# Supplementary material for: Microarray Analysis Reveals Higher Gestational Folic Acid Alters Expression of Genes in the Cerebellum of Mice Offspring—A Pilot Study
Source: MDPI journal article supplement (doi:10.3390/brainsci5010014), 2015-01-26
Supplement: s1 [file s1]

## Sheet: Table S1
Table S1. Genes down-regulated ≥2.5 fold in the cerebellum of male pups from mothers having FA supplementation during gestation at 20 mg/kg in comparison to mothers at 2 mg/kg diet.
UniqueID	Accession	Symbol	Fold Change
A_30_P01020950	Unknown	chr2:117024098-117025009_R	-40.56
A_51_P352720	ref|NM_053098|ens|ENSMUST00000031694|gb|BC156701|gb|AK147141	Lmod2	-36.127
A_66_P114158	gb|AK019659|gb|BY715193|tc|TC1698207|riken|4930487D11	4930487D11Rik	-24.067
A_52_P71756	ref|NM_198669|ens|ENSMUST00000087853|gb|BC011176|gb|X63005	Prb1	-23.752
A_30_P01031063	Unknown	chr4:106506151-106537682_R	-23.621
A_30_P01018900	Unknown	chr3:27760757-27761151_F	-22.131
A_55_P2176898	Unknown	A_55_P2176898	-20.521
A_55_P2183313	ens|ENSMUST00000103637|gb|M87848|gb|M87850|tc|TC1686977	ENSMUST00000103637	-20.506
A_30_P01025884	Unknown	chr8:26870059-26870530_F	-20.478
A_30_P01022243	Unknown	chr5:22810359-22836386_F	-19.973
A_66_P128199	ref|NM_022721|ref|NM_001042659|ens|ENSMUST00000063982|ens|ENSMUST00000116133	Fzd5	-18.176
A_55_P2125823	Unknown	A_55_P2125823	-18.038
A_30_P01019905	Unknown	chr8:91530286-91530495_R	-17.753
A_52_P414368	ref|NM_178715|ens|ENSMUST00000042975|gb|BC119224|gb|BC119226	Tmem30b	-16.484
A_51_P390804	ref|NM_016873|ens|ENSMUST00000029188|gb|AF100778|gb|BC032877	Wisp2	-16.393
A_55_P2044374	nap|NAP059850-1	NAP059850-1	-16.011
A_52_P142888	ref|NM_001038604|ref|NM_021364|ens|ENSMUST00000031975|ens|ENSMUST00000101491	Clec5a	-15.978
A_52_P25026	ref|NM_133203|ens|ENSMUST00000088019|ens|ENSMUST00000122219|ens|ENSMUST00000014687	Klra17	-15.714
A_52_P126132	ens|ENSMUST00000145763|gb|AK014984|tc|TC1586709|riken|4921530G03	Mmrn1	-15.137
A_30_P01028708	Unknown	chr1:69531191-69570566_F	-14.754
A_55_P2101947	Unknown	A_55_P2101947	-14.39
A_66_P140082	ref|NM_207657|gb|AK077239|ens|ENSMUST00000063524|ens|ENSMUST00000095004	5031410I06Rik	-14.241
A_30_P01024270	Unknown	chr17:15357376-15385701_F	-13.861
A_55_P1952618	ref|NM_007895|ref|NM_007894|ens|ENSMUST00000074839|ens|ENSMUST00000100691	Ear2	-13.794
A_55_P2152881	ref|NM_146568|ens|ENSMUST00000099916|gb|BC111581|gb|BC143104	Olfr1012	-13.775
A_30_P01030033	Unknown	chr16:7947710-7948066_R	-13.52
A_55_P2026715	ref|NM_175111|ens|ENSMUST00000023555|gb|AK038142|tc|TC1597680	Hspbap1	-13.436
A_55_P2033824	ref|NM_207622|ens|ENSMUST00000076675|gb|AF102517|gb|BC104289	Olfr403	-13.297
A_52_P462657	ref|NM_001105561|gb|AK139527|gb|AK135739|gb|AK169863	Gm11545	-13.205
A_55_P2415387	ref|NM_026668|ens|ENSMUST00000172350|ens|ENSMUST00000165162|gb|AK015024	Lrriq4	-13.141
A_30_P01026694	Unknown	chr5:106121842-106127192_F	-12.817
A_55_P2091055	Unknown	A_55_P2091055	-12.649
A_55_P2099114	ens|ENSMUST00000116231	LOC100504608	-12.449
A_30_P01030531	Unknown	chr12:72103832-72116875_R	-12.286
A_51_P397575	ref|NM_019539|ens|ENSMUST00000021892|gb|BC064740|gb|BC050198	Cts7	-11.68
A_55_P1968085	Unknown	A_55_P1968085	-11.432
A_30_P01030045	Unknown	chr9:82991830-82999937_F	-10.793
A_55_P2050988	Unknown	A_55_P2050988	-10.718
A_55_P2155572	Unknown	A_55_P2155572	-10.674
A_55_P2173601	ens|ENSMUST00000128091|ref|XM_003086374|ref|XM_003085434|tc|TC1652560	ENSMUST00000128091	-10.644
A_55_P2075090	ref|NM_001167586|ens|ENSMUST00000041537	Gm7257	-10.133
A_55_P2018836	Unknown	A_55_P2018836	-10.042
A_55_P1972495	nap|NAP062625-1	NAP062625-1	-10.042
A_51_P192089	ref|NM_028228|ens|ENSMUST00000022528|gb|AJ344106|gb|BC115636	Pinx1	-9.741
A_55_P2033461	nap|NAP114803-1	NAP114803-1	-9.707
A_55_P2193819	gb|BG067895	C87882	-9.633
A_55_P2028804	ref|NM_016723|ens|ENSMUST00000002289|gb|BC029242|gb|AB033370	Uchl3	-9.613
A_30_P01029567	Unknown	chr16:9129538-9137898_R	-9.573
A_55_P1970901	ref|NM_001033498|ens|ENSMUST00000098661|gb|AK041631|tc|TC1590752	Gramd2	-9.5
A_30_P01033194	Unknown	chr10:92798725-92811622_F	-9.461
A_52_P200125	ens|ENSMUST00000103559|ens|ENSMUST00000103563|gb|X00697|gb|M77018	ENSMUST00000103559	-9.448
A_55_P1985945	Unknown	A_55_P1985945	-9.389
A_55_P1990538	ref|NM_029561|ref|NM_001190989|ens|ENSMUST00000149781|ens|ENSMUST00000149358	Ndfip2	-9.286
A_55_P2102738	gb|AK036976|gb|AK035064|gb|AK149481|gb|AK143074	AK036976	-9.26
A_55_P1968399	ref|NM_001150749|ref|NM_017473|ens|ENSMUST00000095258|ens|ENSMUST00000047199	Rdh7	-9.228
A_55_P1966383	Unknown	A_55_P1966383	-9.057
A_55_P2012592	ref|NM_134109|ens|ENSMUST00000119464|ens|ENSMUST00000089618|ens|ENSMUST00000023617	Ildr1	-9.038
A_55_P2074411	Unknown	A_55_P2074411	-9.013
A_30_P01024857	Unknown	chr18:5951953-5952386_F	-8.932
A_55_P1980721	Unknown	A_55_P1980721	-8.926
A_55_P2146872	Unknown	A_55_P2146872	-8.883
A_55_P2174743	ref|NM_018747|ens|ENSMUST00000095779|ens|ENSMUST00000041984|gb|BC099487	Akap7	-8.846
A_51_P499599	ref|NM_054049|ens|ENSMUST00000022952|gb|AY038074|gb|AK052147	Osr2	-8.803
A_30_P01024464	Unknown	chr17:83497541-83520081_R	-8.803
A_55_P2065508	Unknown	A_55_P2065508	-8.779
A_30_P01019475	Unknown	chr6:120670699-120677449_F	-8.773
A_55_P2037697	ref|NM_001076679|ens|ENSMUST00000108361|gb|DQ055452|gb|BC152888	Gm9733	-8.76
A_30_P01018927	Unknown	chr15:90156889-90184564_F	-8.754
A_55_P2010586	ref|XR_001564|ref|XR_001587|gb|AK132285|riken|3830429B21	Gm6252	-8.748
A_30_P01020566	Unknown	chr18:49644984-49645412_F	-8.634
A_55_P2179983	gb|AK139810|riken|B020018I07	Gm10637	-8.58
A_55_P1976882	gb|DT926623	DT926623	-8.491
A_30_P01019927	Unknown	chr1:71984564-71985074_R	-8.474
A_55_P1999601	gb|AK135158|riken|6530432O13	Gm10631	-8.456
A_30_P01023489	Unknown	chr9:27148989-27155714_R	-8.444
A_30_P01028303	Unknown	chr14:49314574-49358174_R	-8.357
A_30_P01024324	Unknown	chr3:137736327-137752677_R	-8.357
A_55_P1993589	Unknown	A_55_P1993589	-8.248
A_55_P2132888	gb|AK014678|ens|ENSMUST00000108374|gb|AV248921|tc|TC1747513	Sdcbp	-8.248
A_55_P2170747	gb|AK020710|riken|A230103O09|nap|NAP076083-1	A230103O09Rik	-8.236
A_55_P2081885	Unknown	A_55_P2081885	-8.219
A_55_P2089268	ref|NM_053237|ens|ENSMUST00000089918|gb|BC141639|gb|BC140345	Vmn1r14	-8.14
A_55_P2387284	gb|BC099970|tc|TC1646119|nap|NAP041479-1	BC099970	-8.117
A_51_P365844	ref|NM_146893|ens|ENSMUST00000099800|tc|TC1600275|nap|NAP021867-001	Olfr1216	-8.056
A_55_P2355676	gb|AK017005|tc|TC1731788|riken|4933431I19|nap|NAP073583-1	4933431I19Rik	-8
A_55_P2088360	ref|XM_355309|ref|XM_909470|nap|NAP101660-1	Gm13194	-7.945
A_55_P2005720	Unknown	A_55_P2005720	-7.912
A_55_P2180445	Unknown	A_55_P2180445	-7.873
A_55_P2095010	Unknown	A_55_P2095010	-7.852
A_51_P343954	ref|NM_178695|ens|ENSMUST00000028593|gb|BC151019|gb|BC151011	Prrg4	-7.717
A_55_P1967002	Unknown	A_55_P1967002	-7.701
A_55_P2004168	Unknown	A_55_P2004168	-7.642
A_30_P01025650	Unknown	chr13:98062189-98066613_F	-7.548
A_30_P01027184	Unknown	chr18:75513062-75523889_F	-7.532
A_55_P1981649	Unknown	A_55_P1981649	-7.501
A_30_P01020706	Unknown	chr8:10913790-10928696_R	-7.495
A_55_P2157159	Unknown	A_55_P2157159	-7.402
A_30_P01020811	Unknown	chr11:120041124-120052299_F	-7.392
A_52_P571109	ens|ENSMUST00000150164|ref|XM_001481325|ref|XM_001481332|tc|TC1601122	Olfr1285	-7.387
A_55_P2179246	Unknown	A_55_P2179246	-7.356
A_55_P1964332	Unknown	A_55_P1964332	-7.341
A_55_P2133385	tc|TC1739424	TC1739424	-7.341
A_30_P01022513	Unknown	chr6:28161665-28189840_F	-7.326
A_55_P2149906	ens|ENSMUST00000097570|nap|NAP114238-1	Gm8618	-7.321
A_55_P2147532	ref|NM_146978|ens|ENSMUST00000102609|ens|ENSMUST00000111516|tc|TC1720389	Olfr1258	-7.25
A_55_P1995127	Unknown	A_55_P1995127	-7.2
A_55_P2174942	nap|NAP059947-1|nap|NAP102330-1	NAP059947-1	-7.19
A_55_P2199917	gb|AK135741|riken|7420409G12	AU043392	-7.165
A_55_P1963094	ref|NM_133698|ens|ENSMUST00000107293|gb|BC118008|gb|AY027660	Hrnr	-7.106
A_30_P01029962	Unknown	chr4:140841206-140841639_F	-7.086
A_55_P2124319	nap|NAP028285-1	NAP028285-1	-7.081
A_52_P322927	nap|NAP002592-003	NAP002592-003	-7.047
A_30_P01033258	Unknown	chr14:80080060-80080597_R	-7.008
A_55_P2032559	nap|NAP099731-001	NAP099731-001	-7.008
A_51_P292357	ref|NM_016959|ens|ENSMUST00000074680|ens|ENSMUST00000029722|ref|XM_974769	Rps3a	-6.989
A_55_P2008870	ref|XM_141816|ref|XM_906854|nap|NAP021037-001	Gm4910	-6.979
A_55_P2042863	Unknown	A_55_P2042863	-6.96
A_30_P01030077	Unknown	chr9:46894029-46973977_R	-6.945
A_55_P2016967	ref|XM_975156|gb|BC056958|gb|BC086939|gb|DT907912	Gm7536	-6.926
A_55_P2153321	Unknown	A_55_P2153321	-6.902
A_30_P01028134	Unknown	chr8:80581177-80621652_R	-6.902
A_30_P01022558	Unknown	chr10:62262341-62271961_R	-6.878
A_52_P676359	ref|NM_010190|ens|ENSMUST00000028179|gb|AF063217|gb|BC107220	Fcnb	-6.869
A_55_P2090933	Unknown	A_55_P2090933	-6.845
A_30_P01030422	Unknown	chr2:31001976-31006755_R	-6.84
A_55_P1954960	ref|NM_028742|ens|ENSMUST00000111708|gb|AK016641|gb|BC053420	Ifltd1	-6.793
A_30_P01025310	Unknown	chr2:108456668-108532418_R	-6.793
A_55_P2134882	ens|ENSMUST00000129465|gb|AK008024|tc|TC1592381|riken|2010001P20	Slc7a15	-6.76
A_55_P2082489	ref|NM_147036|ens|ENSMUST00000057386|gb|BC125358|nap|NAP021758-001	Olfr283	-6.76
A_55_P1987847	Unknown	A_55_P1987847	-6.755
A_30_P01026280	Unknown	chr3:87757295-87774970_F	-6.751
A_55_P2009449	ref|NM_175498|ens|ENSMUST00000122431|ens|ENSMUST00000089236|gb|AK043718	Pnma2	-6.746
A_51_P197064	ref|NM_028927|ens|ENSMUST00000002025|gb|BC132110|gb|BC132298	Tktl2	-6.746
A_55_P2044074	ref|NM_008192|ens|ENSMUST00000108665|ens|ENSMUST00000108664|ens|ENSMUST00000021259	Gucy2e	-6.741
A_30_P01029241	Unknown	chr13:99465269-99472596_F	-6.713
A_30_P01026573	Unknown	chr3:19179899-19216399_R	-6.648
A_51_P471911	gb|AK014837|tc|TC1592958|riken|4921507L20|nap|NAP018393-001	4921507L20Rik	-6.648
A_55_P2042071	ref|NM_133668|ens|ENSMUST00000076694|ens|ENSMUST00000163246|ref|XM_001475927	Slc25a3	-6.598
A_55_P2138739	Unknown	A_55_P2138739	-6.584
A_55_P1972560	ref|NM_009567|gb|AK132229|riken|3526405A20	Zfp93	-6.575
A_30_P01017982	Unknown	chr3:131128972-131163308_R	-6.57
A_55_P2107020	ref|XR_108070|ref|XR_105252|gb|AK153680|riken|A630043H04	Gm10690	-6.557
A_30_P01021941	Unknown	chr9:36511566-36512137_R	-6.543
A_55_P2039622	ref|NM_001170333|ref|NM_011999|ref|NM_001170332|ens|ENSMUST00000041779	Clec4a2	-6.503
A_55_P2133978	ref|NM_001009950|ens|ENSMUST00000036748|gb|BC089013|tc|TC1588540	Slc38a8	-6.485
A_30_P01017593	Unknown	chr10:16670899-16710263_R	-6.476
A_55_P2073602	ens|ENSMUST00000098625|ref|XM_003086338|ref|XM_003084545|gb|AK156352	Gm10650	-6.453
A_52_P401475	ref|NM_026390|ens|ENSMUST00000027592|gb|AK147795|gb|AK129098	Ubxn4	-6.444
A_55_P2183518	Unknown	A_55_P2183518	-6.444
A_52_P671132	ref|NM_152915|ens|ENSMUST00000049126|gb|AK044597|gb|AK152755	Dner	-6.44
A_30_P01022059	Unknown	chr3:27848923-27856325_F	-6.435
A_30_P01028716	Unknown	chr15:10367307-10370076_R	-6.4
A_52_P112033	ref|NM_028533|gb|AK045280|gb|BC053441|tc|TC1588356	1700065D16Rik	-6.395
A_55_P2060163	Unknown	A_55_P2060163	-6.391
A_52_P82617	ref|NM_175431|ens|ENSMUST00000053458|gb|BC144941|gb|BC145648	A830093I24Rik	-6.378
A_55_P2102816	ref|NM_019865|ens|ENSMUST00000081987|ens|ENSMUST00000152266|ens|ENSMUST00000149857	Rpl36a	-6.32
A_55_P2043882	ref|NM_012035|ens|ENSMUST00000022023|gb|AK135153|gb|AF139923	Trpc7	-6.32
A_30_P01026825	Unknown	chr17:79042382-79052046_R	-6.294
A_66_P120425	nap|NAP111304-1	NAP111304-1	-6.29
A_55_P2185143	ens|ENSMUST00000111181|ens|ENSMUST00000111182|gb|AK090036|gb|AF367709	Fkbp6	-6.281
A_55_P2029436	Unknown	A_55_P2029436	-6.281
A_66_P134809	ref|NR_002840|gb|AK083453|gb|X59728|gb|BC080708	Gas5	-6.268
A_55_P2155181	Unknown	A_55_P2155181	-6.251
A_30_P01019558	Unknown	chr18:47352028-47352681_R	-6.242
A_55_P2020736	ref|NM_144939|ens|ENSMUST00000138316|ens|ENSMUST00000113296|ens|ENSMUST00000024034	Frs3	-6.238
A_30_P01020573	Unknown	chr17:6806500-6861042_R	-6.225
A_55_P2073841	Unknown	A_55_P2073841	-6.22
A_52_P740562	ref|NM_025587|ens|ENSMUST00000148629|ens|ENSMUST00000059080|gb|BC023795	Rps21	-6.207
A_30_P01027720	Unknown	chr17:32229024-32229663_F	-6.177
A_30_P01021689	Unknown	chr12:109619407-109619843_F	-6.169
A_55_P1994173	Unknown	A_55_P1994173	-6.165
A_66_P111689	ens|ENSMUST00000168454|ref|XM_001003736|ref|XM_980593|nap|NAP019856-001	Gm9372	-6.13
A_66_P138072	gb|AK054182|ens|ENSMUST00000105588|tc|TC1612040|riken|E230025M07	Esr1	-6.118
A_66_P107523	gb|BG085481|nap|NAP049574-1	BG085481	-6.101
A_55_P2117677	Unknown	A_55_P2117677	-6.092
A_51_P307944	ref|NM_010102|ens|ENSMUST00000053646|gb|AJ006074|gb|BC107000	S1pr4	-6.075
A_30_P01017883	Unknown	chr2:75493715-75494227_R	-6.038
A_55_P1981584	ref|NM_146607|ens|ENSMUST00000095084|ens|ENSMUST00000172257|gb|BC127971	Olfr270	-6.034
A_55_P2214959	gb|AK084284|tc|TC1631961|riken|D230017M19|nap|NAP020151-001	D230017M19Rik	-6.025
A_66_P117414	Unknown	A_66_P117414	-6.008
A_55_P2072150	ref|NM_016983|ref|NM_016982|ens|ENSMUST00000075371|ens|ENSMUST00000075017	Vpreb2	-6
A_30_P01022549	Unknown	chr1:175705225-175717250_R	-5.967
A_55_P1954860	Unknown	A_55_P1954860	-5.963
A_55_P2049976	Unknown	A_55_P2049976	-5.959
A_30_P01017821	Unknown	chr10:93819821-93976621_R	-5.95
A_55_P2030790	nap|NAP059513-1	NAP059513-1	-5.946
A_55_P1955950	ref|XR_105877|ref|XR_107057|gb|AK136858|riken|9330154B14	Gm8437	-5.926
A_55_P2130144	ref|NM_181074|ens|ENSMUST00000053568|ens|ENSMUST00000114247|gb|AK027262	Lingo1	-5.913
A_30_P01027222	Unknown	chr5:105063625-105077700_R	-5.893
A_30_P01021824	Unknown	chr19:29969050-29980675_F	-5.877
A_30_P01032372	Unknown	chr18:69923410-69965360_F	-5.856
A_30_P01025331	Unknown	chr6:125330524-125410249_F	-5.844
A_55_P2162543	Unknown	A_55_P2162543	-5.824
A_55_P2183369	ens|ENSMUST00000103401|ens|ENSMUST00000103402|gb|U18577|gb|DQ125306	ENSMUST00000103401	-5.824
A_30_P01018115	Unknown	chr18:36449530-36456800_R	-5.808
A_55_P2170599	Unknown	A_55_P2170599	-5.796
A_30_P01025255	Unknown	chr6:51542802-51544588_R	-5.784
A_55_P2039359	ref|NM_011613|ens|ENSMUST00000110858|ens|ENSMUST00000022592|gb|AK159498	Tnfsf11	-5.776
A_55_P2055523	nap|NAP062918-1	NAP062918-1	-5.772
A_55_P1965273	ref|NM_153391|ens|ENSMUST00000041892|ens|ENSMUST00000113784|gb|AY029258	Wdr19	-5.76
A_51_P126365	ref|NM_153052|ens|ENSMUST00000167932|ens|ENSMUST00000015587|gb|BC120809	Gzmn	-5.744
A_55_P2128853	ref|NM_001012766|ref|NM_017388|gb|BC148661|gb|BC152970	Ear12	-5.744
A_30_P01027445	Unknown	chr19:56820850-56837925_R	-5.744
A_55_P1998169	ref|NM_177123|ens|ENSMUST00000041840|gb|BC132098|gb|AK048961	Spef2	-5.736
A_55_P2041145	Unknown	A_55_P2041145	-5.728
A_66_P107734	gb|DV047974|nap|NAP030482-1|nap|NAP112557-1	DV047974	-5.728
A_55_P2008691	Unknown	A_55_P2008691	-5.724
A_55_P2072915	Unknown	A_55_P2072915	-5.716
A_55_P2160473	Unknown	A_55_P2160473	-5.708
A_55_P2143446	nap|NAP029911-1	NAP029911-1	-5.704
A_55_P1991151	ref|NM_016738|ens|ENSMUST00000129311|ens|ENSMUST00000000756|ref|XM_001473362	Rpl13	-5.7
A_55_P1993879	ref|XR_105781|ref|XR_106983|nap|NAP095943-001	Gm6030	-5.692
A_55_P2014807	ref|NM_024212|ens|ENSMUST00000034966|gb|BC094036|gb|BC132321	Rpl4	-5.688
A_55_P2097759	ens|ENSMUST00000076314|ens|ENSMUST00000080237|ref|XM_001480398|ref|XM_003085763	ENSMUST00000076314	-5.68
A_55_P2046368	ref|NM_177345|ens|ENSMUST00000113126|ens|ENSMUST00000147337|gb|BC090644	Mapkap1	-5.673
A_55_P2077623	Unknown	A_55_P2077623	-5.673
A_55_P1999838	ref|NM_007749|ens|ENSMUST00000074576|ens|ENSMUST00000131011|ref|XM_001480380	Cox7c	-5.661
A_55_P2065298	ref|NM_001011831|ens|ENSMUST00000067670|gb|BC150926|tc|TC1694309	Olfr1500	-5.649
A_51_P228971	ref|NM_023219|gb|BC109133|gb|BC109134|gb|BC127612	Slc5a4b	-5.637
A_55_P2060663	ref|XM_915945	Gm14407	-5.61
A_55_P2058606	ref|NM_177661|ref|NR_037189|ens|ENSMUST00000094227|ens|ENSMUST00000049476	C130079G13Rik	-5.606
A_55_P2166049	ref|NM_030738|ens|ENSMUST00000086338|gb|AF324870|tc|TC1596838	Vmn1r65	-5.602
A_55_P2116235	Unknown	A_55_P2116235	-5.591
A_30_P01030011	Unknown	chr3:41143423-41359623_R	-5.587
A_55_P2082969	ref|NM_027661|ens|ENSMUST00000062085|gb|AK016803|gb|BC049724	Hsfy2	-5.583
A_30_P01022999	Unknown	chr3:93150607-93151201_R	-5.579
A_55_P2222557	gb|AK005516|tc|TC1599588|riken|1600022D10|nap|NAP018563-001	1600022D10Rik	-5.571
A_30_P01020420	Unknown	chr10:116814196-116920696_R	-5.567
A_30_P01019034	Unknown	chrX:6942702-6954713_F	-5.533
A_55_P2269254	gb|AK017575|tc|NP741061|riken|5730419F03|nap|NAP073044-1	5730419F03Rik	-5.529
A_55_P2003492	Unknown	A_55_P2003492	-5.529
A_55_P2064969	nap|NAP018461-001	NAP018461-001	-5.525
A_52_P573727	ref|NM_199476|ens|ENSMUST00000022901|gb|BC058103|nap|NAP037297-1	Rrm2b	-5.521
A_55_P2094991	Unknown	A_55_P2094991	-5.51
A_55_P1997574	ref|NR_015347|tc|TC1640895|nap|NAP112560-1|nap|NAP014219-001	Gm4850	-5.506
A_55_P2044843	nap|NAP102896-1|nap|NAP112426-1	NAP102896-1	-5.491
A_55_P2166506	ref|XM_886369|ref|XM_917300|nap|NAP027003-1	Gm6272	-5.487
A_55_P2057976	Unknown	A_55_P2057976	-5.479
A_55_P2140953	Unknown	A_55_P2140953	-5.472
A_55_P2028832	ref|NM_001033539|gb|AK157452|gb|AK139543|gb|AY833559	Bex6	-5.438
A_55_P2275319	gb|BY715316	1700025F24Rik	-5.43
A_55_P1955242	nap|NAP114395-1	NAP114395-1	-5.426
A_55_P1982096	ref|NM_024176|ens|ENSMUST00000126908|ens|ENSMUST00000025853|ens|ENSMUST00000125468	Drap1	-5.426
A_55_P2186460	ref|NR_002863|gb|AK033011|gb|AY117414|tc|TC1628116	Emx2os	-5.426
A_55_P2130834	Unknown	A_55_P2130834	-5.419
A_52_P600304	ref|NM_026165|ens|ENSMUST00000060396|gb|AK030346|riken|5230400P09	Slc25a46	-5.389
A_55_P2081930	ref|NM_146897|ens|ENSMUST00000099804|tc|NP646708|nap|NAP025162-001	Olfr1214	-5.389
A_55_P2062480	Unknown	A_55_P2062480	-5.385
A_55_P2065040	Unknown	A_55_P2065040	-5.381
A_55_P2175615	ref|NM_144901|ref|NM_001161854|ens|ENSMUST00000071942|ens|ENSMUST00000029446	Csde1	-5.378
A_55_P1991994	ref|NM_001081432|ens|ENSMUST00000050702|gb|BC156453|nap|NAP029608-1	Ptprq	-5.378
A_55_P2119478	ref|NM_028388|ens|ENSMUST00000024909|ens|ENSMUST00000143987|gb|AK150404	Ndufv2	-5.363
A_55_P2091224	Unknown	A_55_P2091224	-5.355
A_55_P2115364	Unknown	A_55_P2115364	-5.355
A_55_P2185330	ref|XM_003085091|ref|XM_003086029|gb|AK038241|tc|TC1592188	Gm10914	-5.352
A_66_P132446	ref|NM_027604|ens|ENSMUST00000020334|ens|ENSMUST00000105259|gb|AF468037	Usp15	-5.344
A_55_P2414679	gb|AK049866|tc|TC1593039|riken|C630004M23|nap|NAP025684-001	C630004M23Rik	-5.344
A_30_P01026334	Unknown	chr14:62267786-62285335_F	-5.337
A_55_P1987013	ref|XM_003085398|ref|XM_003085747|gb|AK137618|riken|9830168E02	Gm10372	-5.333
A_30_P01031977	Unknown	chr5:13125413-13310754_F	-5.329
A_55_P2319730	gb|AK019576|tc|TC1621540|riken|4930414F18|nap|NAP021780-001	4930414F18Rik	-5.318
A_52_P508999	ref|NM_146023|ref|NM_001077496|ens|ENSMUST00000093983|ens|ENSMUST00000170422	Evi2b	-5.315
A_66_P112234	gb|AY081860|tc|TC1706681|tc|TC1707790|nap|NAP018725-001	AY081860	-5.311
A_55_P1966630	ens|ENSMUST00000155472	ENSMUST00000155472	-5.311
A_30_P01021541	Unknown	chr15:61984389-62102500_R	-5.307
A_30_P01029812	Unknown	chr8:28345511-28361105_R	-5.304
A_51_P478238	ref|NM_031387|ref|NM_001002241|ref|NM_001002238|ref|NM_001002240	Tdrd1	-5.296
A_55_P2108275	Unknown	A_55_P2108275	-5.296
A_51_P361951	ref|NM_025710|ens|ENSMUST00000042834|gb|BC019934|gb|BC047125	Uqcrfs1	-5.289
A_55_P2409570	gb|AK042182|tc|TC1599886|riken|A630067L13	Luc7l2	-5.282
A_51_P285736	ref|NM_008798|ens|ENSMUST00000027507|gb|AK039828|gb|E06067	Pdcd1	-5.282
A_55_P1954897	Unknown	A_55_P1954897	-5.267
A_30_P01017733	Unknown	chr9:67414463-67483185_F	-5.26
A_55_P2182147	gb|CN835660	CN835660	-5.256
A_55_P1985463	Unknown	A_55_P1985463	-5.256
A_30_P01026162	Unknown	chr8:122947917-122948153_F	-5.256
A_55_P2090364	ens|ENSMUST00000113749|ens|ENSMUST00000141412|ens|ENSMUST00000067916|gb|AK083793	Plcd4	-5.252
A_55_P2286493	ref|NR_045506|ens|ENSMUST00000131019|gb|AK016664|riken|4933405E24	4933405E24Rik	-5.242
A_55_P1989469	nap|NAP111475-1	NAP111475-1	-5.238
A_51_P398089	ref|NM_134229|ens|ENSMUST00000055964|gb|BC138174|gb|BC145742	Vmn1r67	-5.234
A_30_P01030075	Unknown	chr18:36449530-36456800_F	-5.227
A_55_P2185589	ref|NM_001172123|ref|NM_001172122|ref|NM_178660|ref|NM_001172124	Rbms3	-5.227
A_30_P01022434	Unknown	chr7:57115122-57121735_R	-5.223
A_52_P205710	ref|NM_021611|ref|NM_001085387|ens|ENSMUST00000005611|gb|BC125528	Myl10	-5.22
A_55_P2140390	nap|NAP068456-1	NAP068456-1	-5.216
A_55_P2139673	ref|NM_025919|ens|ENSMUST00000133613|ens|ENSMUST00000102536|ens|ENSMUST00000079733	Rpl11	-5.205
A_55_P2078830	gb|BC080727	Gm5589	-5.198
A_55_P1976109	nap|NAP113563-1	NAP113563-1	-5.198
A_55_P1994957	ref|XR_107483|ref|XR_107484|ref|XR_107482|nap|NAP111752-1	LOC100503168	-5.187
A_30_P01022829	Unknown	chr1:78591605-78606083_R	-5.187
A_30_P01020727	Unknown	chr12:82500406-82501102_F	-5.184
A_55_P2055844	ref|NM_025785|ens|ENSMUST00000098917|ens|ENSMUST00000043520|gb|AK134722	Fbxo25	-5.18
A_30_P01023582	Unknown	chr1:135992981-135995736_R	-5.169
A_55_P1957754	ens|ENSMUST00000077381|nap|NAP092663-001	ENSMUST00000077381	-5.155
A_30_P01019246	Unknown	chr6:66994066-67034841_F	-5.13
A_55_P2142808	Unknown	A_55_P2142808	-5.127
A_30_P01022458	Unknown	chr11:69193873-69194307_F	-5.127
A_55_P2267696	ens|ENSMUST00000168137|gb|AK134160|gb|BB031169|riken|5830462I19	ENSMUST00000168137	-5.112
A_55_P2087374	Unknown	A_55_P2087374	-5.102
A_55_P2002954	Unknown	A_55_P2002954	-5.095
A_55_P2012599	ref|XM_001000571|ref|XM_137270	Kifc5c-ps	-5.088
A_55_P2046153	Unknown	A_55_P2046153	-5.084
A_30_P01022405	Unknown	chr7:85949555-85960019_F	-5.074
A_30_P01022846	Unknown	chrX:12443510-12444165_F	-5.067
A_55_P2061660	ref|NM_001081182|ens|ENSMUST00000069805|ens|ENSMUST00000107396|tc|TC1599071	Atp8b2	-5.06
A_30_P01033414	Unknown	chr10:117027298-117032998_F	-5.053
A_52_P21486	ref|NM_183257|ens|ENSMUST00000074671|gb|AK008993|gb|AY232841	Hamp2	-5.028
A_55_P2121760	Unknown	A_55_P2121760	-5.025
A_55_P2176871	Unknown	A_55_P2176871	-4.993
A_30_P01022956	Unknown	chr13:70745306-70837331_R	-4.986
A_30_P01025140	Unknown	chr4:147156425-147183949_R	-4.979
A_55_P2043018	ref|NM_001102580|ens|ENSMUST00000165771	Vmn2r76	-4.973
A_55_P1957768	Unknown	A_55_P1957768	-4.966
A_55_P2182006	ref|NM_133183|ens|ENSMUST00000108647|gb|AF361348|gb|BC115456	Cacng6	-4.966
A_55_P2024600	ref|NM_001008549|ens|ENSMUST00000107972|ref|XM_003086596|gb|AK155078	Zfp658	-4.959
A_51_P334979	ref|NM_009695|ens|ENSMUST00000142352|ens|ENSMUST00000150569|ens|ENSMUST00000134116	Apoc2	-4.955
A_55_P2011672	nap|NAP030482-1|nap|NAP112557-1|nap|NAP114033-1	NAP030482-1	-4.955
A_55_P2034320	Unknown	A_55_P2034320	-4.949
A_30_P01023772	Unknown	chr17:84895250-84908450_R	-4.945
A_55_P2004137	ref|NM_008138|ens|ENSMUST00000055704|ens|ENSMUST00000165357|gb|BC065159	Gnai2	-4.945
A_30_P01031125	Unknown	chr10:59382822-59383642_R	-4.938
A_55_P1954856	ref|NM_001083887|ref|NM_172272|ens|ENSMUST00000058905|gb|AK154150	Pars2	-4.938
A_30_P01027962	Unknown	chr3:148884650-148888709_R	-4.928
A_55_P1954361	nap|NAP018620-001	NAP018620-001	-4.928
A_55_P2108761	ref|NM_172713|ens|ENSMUST00000031364|gb|AK160646|gb|BC042708	Sdad1	-4.911
A_55_P2139009	nap|NAP113833-1	NAP113833-1	-4.904
A_30_P01031823	Unknown	chr17:21177225-21187525_R	-4.901
A_55_P2057913	ens|ENSMUST00000085496|nap|NAP092777-001|nap|NAP112032-1	ENSMUST00000085496	-4.897
A_55_P2083566	nap|NAP061238-1	NAP061238-1	-4.88
A_51_P115535	ref|NM_146949|ens|ENSMUST00000071437|tc|NP646672|nap|NAP022188-001	Olfr339	-4.88
A_30_P01021897	Unknown	chr3:35782698-35789932_R	-4.853
A_55_P2032890	ref|NM_001177504|ens|ENSMUST00000100882|gb|AK133454|riken|4933439B04	Gm6588	-4.847
A_52_P352563	ref|NR_003625|ens|ENSMUST00000136180|ens|ENSMUST00000152419|gb|BC049631	1700073E17Rik	-4.84
A_30_P01023997	Unknown	chr12:110967974-110969051_F	-4.823
A_55_P2055763	ref|NM_001034902|gb|BC150951|gb|AK132708|ens|ENSMUST00000113802	Gm5878	-4.813
A_30_P01027303	Unknown	chr12:76771424-76772158_F	-4.813
A_55_P2135031	nap|NAP068632-1|nap|NAP070801-1	NAP068632-1	-4.813
A_55_P1961165	nap|NAP015379-001	NAP015379-001	-4.81
A_55_P2005977	Unknown	A_55_P2005977	-4.807
A_55_P1974807	ref|XR_106168|ref|XR_108036|gb|AK020815|gb|AK136274	A930006D01Rik	-4.803
A_55_P2178720	Unknown	A_55_P2178720	-4.793
A_55_P1952312	Unknown	A_55_P1952312	-4.79
A_52_P11061	ens|ENSMUST00000023433|gb|AK122356|gb|AK028543|tc|TC1619687	Tomm70a	-4.773
A_30_P01020024	Unknown	chr1:52507374-52514124_F	-4.77
A_55_P2060608	nap|NAP000014-005	NAP000014-005	-4.754
A_52_P361435	ref|NM_175513|ens|ENSMUST00000047527|gb|BC035535|gb|AK035949	Zfp804a	-4.747
A_55_P2046178	ens|ENSMUST00000075549|ens|ENSMUST00000080545|nap|NAP000030-004|nap|NAP114480-1	Gm5451	-4.737
A_55_P2010936	ref|NM_015796|ens|ENSMUST00000032818|ens|ENSMUST00000108278|gb|AK133408	Fbxo17	-4.731
A_55_P2137726	gb|AK015516|riken|4930466O16	Gm10620	-4.727
A_55_P2026530	ref|NM_177814|ens|ENSMUST00000100776|ens|ENSMUST00000112283|ens|ENSMUST00000090302	Erc2	-4.704
A_55_P2023480	Unknown	A_55_P2023480	-4.701
A_52_P234910	ref|XM_001472223|ref|XM_003086859|nap|NAP061240-1	Gm15032	-4.701
A_55_P1954798	ref|NM_001177487|ref|NM_001079933|ref|NM_001195634|ens|ENSMUST00000074343	Gm15292	-4.701
A_55_P2049025	ens|ENSMUST00000093546|nap|NAP021113-001	ENSMUST00000093546	-4.701
A_30_P01019323	Unknown	chr6:145727805-145728171_F	-4.698
A_55_P2121595	gb|AF397911|ens|ENSMUST00000105495|nap|NAP058269-1	Scml4	-4.691
A_55_P1989248	Unknown	A_55_P1989248	-4.685
A_55_P2119420	ref|NM_026612|ens|ENSMUST00000119379|gb|AK010642|gb|AK007495	Ndufb2	-4.682
A_55_P1994144	ref|NM_001079929|ens|ENSMUST00000169971|ens|ENSMUST00000073277|gb|JN935900	Ccdc154	-4.678
A_51_P200494	ref|NM_010645|ens|ENSMUST00000078835|gb|AK089370|gb|BC026378	Klk1b1	-4.672
A_30_P01022546	Unknown	chr15:83181291-83197750_F	-4.672
A_55_P2017769	ref|NM_001033769|gb|AK139881|tc|TC1596142|riken|B020031M17	B020031M17Rik	-4.665
A_55_P1969176	Unknown	A_55_P1969176	-4.659
A_30_P01018188	Unknown	chr11:87841800-87858725_F	-4.659
A_55_P2138796	ref|NM_177039|ens|ENSMUST00000057465|gb|AK079947|gb|AK040701	A530016L24Rik	-4.649
A_55_P2069468	ref|NM_027588|ens|ENSMUST00000147323|ens|ENSMUST00000002456|ens|ENSMUST00000118657	Nt5c1b	-4.64
A_30_P01028019	Unknown	chr3:36280098-36347798_F	-4.64
A_55_P2121996	Unknown	A_55_P2121996	-4.633
A_55_P2064906	Unknown	A_55_P2064906	-4.63
A_55_P1979536	ref|NM_001130444|ref|NM_001130443|ref|NM_008284|ens|ENSMUST00000168550	Hras1	-4.627
A_30_P01018649	Unknown	chr8:91571643-91576878_R	-4.614
A_55_P2084263	ens|ENSMUST00000143227|ref|XM_003084509|ref|XM_003086249|gb|AK158168	ENSMUST00000143227	-4.608
A_55_P2074982	ref|NM_025281|ens|ENSMUST00000087514|ens|ENSMUST00000114106|gb|AK006373	Lyar	-4.608
A_55_P2042451	ref|NM_133251|gb|AB036708|tc|TC1658676|nap|NAP101870-1	Vgll1	-4.588
A_30_P01023905	Unknown	chr12:82495575-82516300_F	-4.576
A_55_P2083426	Unknown	A_55_P2083426	-4.573
A_52_P497388	nap|NAP017926-001	NAP017926-001	-4.563
A_55_P2131659	ref|NM_145707|ens|ENSMUST00000095217|ens|ENSMUST00000174443|gb|BC119564	Obox3	-4.56
A_55_P2096702	ens|ENSMUST00000143122|tc|TC1645149	ENSMUST00000143122	-4.56
A_30_P01033236	Unknown	chr3:96215885-96218756_R	-4.56
A_55_P2037922	ref|NM_013721|ens|ENSMUST00000137376|ens|ENSMUST00000143678|ens|ENSMUST00000102898	Rpl7a	-4.56
A_66_P108474	Unknown	A_66_P108474	-4.557
A_55_P2218483	gb|AK043413|tc|TC1625045|riken|A730093L10	A730093L10Rik	-4.554
A_55_P2155574	ens|ENSMUST00000077660|tc|TC1778878|nap|NAP000013-001|nap|NAP061297-1	ENSMUST00000077660	-4.55
A_30_P01026872	Unknown	chr3:34003359-34537330_F	-4.541
A_55_P2068451	ref|XR_104530|nap|NAP028769-1|nap|NAP058877-1	Gm7634	-4.541
A_55_P2134452	Unknown	A_55_P2134452	-4.535
A_55_P2029581	Unknown	A_55_P2029581	-4.532
A_30_P01018145	Unknown	chr4:135136959-135139933_F	-4.528
A_55_P2173005	ref|NM_010062|ens|ENSMUST00000003910|gb|AK167277|ens|ENSMUST00000109744	Dnase2a	-4.525
A_55_P2073975	nap|NAP114416-1	NAP114416-1	-4.506
A_52_P460929	ref|NM_001001185|ens|ENSMUST00000078471|gb|BC048507|gb|AK133011	BC048507	-4.497
A_51_P140207	ref|NM_025601|gb|BC049575|gb|AK006340|ens|ENSMUST00000134023	1700029H14Rik	-4.482
A_55_P2057085	Unknown	A_55_P2057085	-4.478
A_51_P506748	ref|NM_172739|ens|ENSMUST00000170567|ens|ENSMUST00000075845|gb|AK173242	Grlf1	-4.472
A_55_P1978726	Unknown	A_55_P1978726	-4.463
A_55_P2106763	ref|NM_025831|ens|ENSMUST00000125037|ens|ENSMUST00000021847|ens|ENSMUST00000053459	1300014I06Rik	-4.451
A_55_P2137286	ref|NR_033535|ens|ENSMUST00000146108|ens|ENSMUST00000100355|gb|BC040765	Gm10845	-4.448
A_51_P207380	ref|NM_199023|ens|ENSMUST00000052416|gb|AK076877|gb|BC087873	4930526D03Rik	-4.444
A_55_P2086628	ens|ENSMUST00000059110|ref|XR_105114|ref|XR_108258|tc|TC1711298	ENSMUST00000059110	-4.438
A_55_P2186621	ref|NM_009033|ref|NM_001252089|ens|ENSMUST00000049245|gb|AK149658	Rbmxl1	-4.435
A_55_P2061134	Unknown	A_55_P2061134	-4.432
A_52_P283368	ens|ENSMUST00000074116|ref|XM_001480808|ref|XM_001477378|ref|XM_003085094	ENSMUST00000074116	-4.432
A_55_P2149189	gb|CJ055109	CJ055109	-4.426
A_55_P2313658	gb|BG066537	BG066537	-4.417
A_55_P2237440	ens|ENSMUST00000141511|gb|AK016792|tc|TC1594136|riken|4933412K16	ENSMUST00000141511	-4.417
A_30_P01018083	Unknown	chr1:183951156-183986156_F	-4.417
A_55_P2256551	ref|NR_045470|gb|AK003944|tc|TC1737601|riken|1110028F18	1110028F18Rik	-4.411
A_30_P01017564	Unknown	chr3:58118325-58136550_F	-4.411
A_51_P256747	ref|NM_173029|ens|ENSMUST00000027852|ens|ENSMUST00000155216|ens|ENSMUST00000148550	Adcy10	-4.405
A_66_P111534	gb|AK017368|tc|TC1692389|riken|5430431A17|nap|NAP022829-001	5430431A17Rik	-4.405
A_55_P2185347	Unknown	A_55_P2185347	-4.405
A_65_P10671	ref|NM_001037134|ref|NM_009830|ens|ENSMUST00000170901|ens|ENSMUST00000108324	Ccne2	-4.405
A_30_P01024981	Unknown	chr1:23340097-23340552_F	-4.392
A_66_P101664	ref|NM_178778|ens|ENSMUST00000038874|gb|AK142499|riken|D530048H07	Scai	-4.386
A_55_P2036967	ref|NM_001017429|ens|ENSMUST00000050273|ens|ENSMUST00000120495|gb|AK146388	Cox17	-4.374
A_55_P1993180	ref|NM_025759|ens|ENSMUST00000095006|ens|ENSMUST00000162387|ref|XM_001477341	Speer4d	-4.368
A_55_P2072543	ref|NM_009188|ens|ENSMUST00000004494|gb|AK173005|gb|AK013202	Sin3b	-4.365
A_66_P122415	ref|NR_024067|gb|AK003573|gb|CK793285|tc|TC1681854	Snhg6	-4.362
A_55_P2134979	ref|XM_003085889|ref|XM_884320|nap|NAP113769-1|nap|NAP113826-1	Gm6115	-4.356
A_30_P01023592	Unknown	chr17:17315025-17460175_F	-4.347
A_30_P01032224	Unknown	chr8:123571640-123607481_F	-4.347
A_55_P1998776	Unknown	A_55_P1998776	-4.344
A_55_P1954086	ref|NM_001198766|ref|NM_015784|ref|NM_001198765|ens|ENSMUST00000107985	Postn	-4.344
A_30_P01031833	Unknown	chr10:5950116-5958250_F	-4.344
A_52_P238902	ref|NM_024262|ens|ENSMUST00000020801|gb|AK004714|gb|AK031106	1200011M11Rik	-4.344
A_55_P1960018	ref|XR_034946|gb|AK143305|riken|E330001B16	Fbxw25	-4.341
A_55_P1997895	ref|NM_021338|ref|NM_001130484|ref|NM_001130485|ens|ENSMUST00000172543	Rpl35a	-4.338
A_55_P2074678	ref|XR_104915|ref|XR_107598|gb|AK156722|riken|F830043P07	Gm3831	-4.335
A_55_P2237915	ref|NM_001081229|ens|ENSMUST00000099090|gb|AK007760|gb|BC058221	Tsc22d2	-4.323
A_30_P01033365	Unknown	chr9:30805020-30810645_F	-4.317
A_55_P2015304	Unknown	A_55_P2015304	-4.314
A_55_P2082271	nap|NAP114207-1|nap|NAP114279-1	NAP114207-1	-4.311
A_55_P2176688	Unknown	A_55_P2176688	-4.308
A_55_P2160253	gb|AK020160|gb|CN686345|gb|BB662374|tc|TC1608373	6720475J19Rik	-4.305
A_55_P1985815	ens|ENSMUST00000103673|tc|NP396944|nap|NAP019755-001	ENSMUST00000103673	-4.296
A_30_P01026012	Unknown	chrX:34360500-34388500_R	-4.29
A_55_P2011163	ref|NM_198677|ens|ENSMUST00000096899|ens|ENSMUST00000164021|ref|XM_001479241	BC061237	-4.29
A_30_P01023786	Unknown	chr5:110891642-110918642_R	-4.29
A_55_P1982559	ref|NM_027040|ens|ENSMUST00000028174|ens|ENSMUST00000086370|ens|ENSMUST00000126242	1700007K13Rik	-4.275
A_30_P01019491	Unknown	chr9:41137539-41353289_R	-4.269
A_30_P01030613	Unknown	chr18:61799195-61807139_F	-4.266
A_30_P01030503	Unknown	chrX:6988942-6998206_R	-4.26
A_55_P2065370	Unknown	A_55_P2065370	-4.257
A_55_P2069144	ens|ENSMUST00000087769|nap|NAP057071-1	ENSMUST00000087769	-4.257
A_55_P2018611	ref|NM_001159518|ref|NM_008048|ens|ENSMUST00000072884|ens|ENSMUST00000163898	Igfbp7	-4.252
A_55_P2100585	ref|NM_001080820|ens|ENSMUST00000109136|gb|BC117858|gb|BC129975	Cass4	-4.246
A_55_P1983888	Unknown	A_55_P1983888	-4.24
A_55_P2022699	tc|TC1709970|nap|NAP031457-1	TC1709970	-4.231
A_55_P2037812	ref|NM_023245|ens|ENSMUST00000040097|gb|AK171869|gb|AK014531	Palmd	-4.222
A_55_P2186450	Unknown	A_55_P2186450	-4.222
A_55_P2111563	Unknown	A_55_P2111563	-4.219
A_30_P01021065	Unknown	chrX:138967807-138968413_R	-4.216
A_30_P01023221	Unknown	chr7:114386535-114443910_F	-4.205
A_55_P1971448	ref|NM_009226|ens|ENSMUST00000002551|ref|XM_001481166|ref|XM_003086278	Snrpd1	-4.202
A_55_P2065442	Unknown	A_55_P2065442	-4.196
A_30_P01021853	Unknown	chr16:23992037-24001037_F	-4.193
A_55_P2181326	ref|XM_001474011	LOC100045292	-4.184
A_55_P2151461	Unknown	A_55_P2151461	-4.181
A_30_P01021372	Unknown	chr3:96205072-96205937_R	-4.173
A_55_P2240116	ref|NR_045498|gb|AK009168|tc|TC1719616|riken|2310005E17	2310005E17Rik	-4.173
A_55_P2008692	ref|NM_010106|ens|ENSMUST00000042235|ref|XR_107483|ref|XR_107484	Eef1a1	-4.17
A_55_P2001238	ref|NM_026313|ens|ENSMUST00000107821|ens|ENSMUST00000165620|ens|ENSMUST00000171033	Luc7l3	-4.158
A_30_P01020058	Unknown	chr11:69195483-69195857_R	-4.155
A_30_P01023632	Unknown	chr9:111214181-111260465_F	-4.153
A_30_P01023452	Unknown	chrX:11693432-11693908_R	-4.15
A_30_P01024546	Unknown	chr11:60728207-60745369_F	-4.144
A_30_P01019507	Unknown	chr11:97457180-97487074_R	-4.13
A_55_P2040270	nap|NAP092480-001	NAP092480-001	-4.124
A_55_P2177639	Unknown	A_55_P2177639	-4.121
A_51_P184321	ref|NM_007926|ens|ENSMUST00000029663|gb|AK087932|gb|AK133859	Aimp1	-4.118
A_52_P482925	ref|NM_025814|ref|NM_001113564|ref|NM_001113565|ref|NM_001113566	Serbp1	-4.115
A_55_P2132147	ens|ENSMUST00000082411|gb|AK139029|gb|BU555928|tc|TC1694307	ND3	-4.104
A_55_P1954393	ref|NM_144796|ens|ENSMUST00000048739|ens|ENSMUST00000085724|gb|AK035779	Susd4	-4.104
A_55_P1971137	Unknown	A_55_P1971137	-4.101
A_55_P2069787	Unknown	A_55_P2069787	-4.098
A_55_P1975932	gb|AK135124|riken|6430706K06	Gm10618	-4.095
A_30_P01024724	Unknown	chr13:73472571-73483846_R	-4.093
A_30_P01024363	Unknown	chr14:21462770-21463270_F	-4.09
A_55_P1964596	ref|NM_177705|ens|ENSMUST00000081074|gb|BC117864|gb|BC117865	4932411N23Rik	-4.087
A_55_P1993280	ref|NM_001166738|ref|NM_001166739|ref|NM_001166744|ref|NM_001166747	Vmn1r104	-4.084
A_55_P2153633	ref|NM_011432|gb|BC092266|gb|BC008243|gb|BC067386	Snrpc	-4.081
A_55_P1993517	ref|NM_001113362|ref|NM_133910|ref|NM_001113364|ens|ENSMUST00000087550	Tbc1d14	-4.081
A_55_P2106330	ref|NM_031390|ref|NM_001099321|ref|NM_177918|ref|NM_001242937	Pramel3	-4.081
A_51_P229664	ref|NM_001033126|ref|NM_001042564|ens|ENSMUST00000032486|gb|L24495	Cd27	-4.073
A_55_P2146535	ref|NM_009924|ens|ENSMUST00000097843|ens|ENSMUST00000068830|gb|X86405	Cnr2	-4.073
A_66_P100268	gb|AK087888|gb|EU234049|tc|NP714769|tc|TC1619420	AK087888	-4.07
A_55_P2117959	ref|NM_007823|ens|ENSMUST00000102707|ens|ENSMUST00000135569|ens|ENSMUST00000030482	Cyp4b1	-4.064
A_55_P2177741	ref|XM_001478213|ref|XM_910904	Gm7166	-4.059
A_55_P1961870	gb|BC025219|tc|TC1755804|tc|TC1639469|tc|TC1579632	BC025219	-4.056
A_55_P2154570	ref|NM_080463|ens|ENSMUST00000170297|ens|ENSMUST00000099191|ens|ENSMUST00000049863	Pofut1	-4.056
A_52_P150114	nap|NAP115343-1|nap|NAP061498-1	NAP115343-1	-4.045
A_55_P2042870	ref|NM_178932|ens|ENSMUST00000041095|gb|AF350445|tc|TC1591107	Aoc2	-4.042
A_55_P2107682	Unknown	A_55_P2107682	-4.042
A_30_P01024503	Unknown	chr15:96984422-97000322_R	-4.039
A_55_P2060878	nap|NAP058380-1	NAP058380-1	-4.033
A_55_P1967320	nap|NAP114236-1	NAP114236-1	-4.033
A_51_P264084	ref|NM_029781|ens|ENSMUST00000020391|ens|ENSMUST00000147802|gb|AK038445	Rab36	-4.028
A_30_P01033487	Unknown	chr6:83841733-83842297_F	-4.022
A_30_P01026206	Unknown	chr1:63168439-63172297_F	-4.017
A_55_P2103811	nap|NAP059416-1	NAP059416-1	-3.994
A_30_P01027948	Unknown	chr6:117829576-117834247_F	-3.994
A_30_P01021550	Unknown	chr19:55715078-55776694_R	-3.994
A_30_P01020490	Unknown	chr2:151343784-151344246_F	-3.989
A_55_P2102698	nap|NAP017864-001	NAP017864-001	-3.989
A_55_P1976734	ref|NM_001174047|ref|NM_020263|ref|NM_001174048|ref|NM_001174050	Cacna2d2	-3.986
A_55_P2032165	ens|ENSMUST00000164923|ens|ENSMUST00000085340|nap|NAP093932-001|nap|NAP093888-001	ENSMUST00000164923	-3.983
A_55_P2038500	gb|DV650783	DV650783	-3.981
A_55_P2239758	gb|AK016492|tc|TC1600695|riken|4931430N09|nap|NAP023626-001	4931430N09Rik	-3.981
A_66_P126603	Unknown	A_66_P126603	-3.978
A_55_P2021393	ref|NM_001105180|ens|ENSMUST00000044583|gb|AB194095|tc|NP1404796	Vmn2r65	-3.972
A_30_P01023546	Unknown	chr19:21655691-21665116_R	-3.972
A_55_P2172500	ref|NM_144934|ens|ENSMUST00000051008|gb|BC064744|tc|TC1583491	Mbd3l2	-3.967
A_55_P1985495	ref|XM_003086212|ref|XM_887942|nap|NAP093230-001|nap|NAP112915-1	Gm13196	-3.964
A_55_P2419514	ref|NM_026484|ens|ENSMUST00000053917|ens|ENSMUST00000115867|gb|BC035524	Ccny	-3.961
A_55_P1979407	ref|NM_001162928	Pom121l2	-3.959
A_55_P2033540	ref|NM_198423|ens|ENSMUST00000044985|gb|AK147250|gb|BC057623	Bahcc1	-3.956
A_30_P01027131	Unknown	chr15:12119755-12127230_R	-3.948
A_55_P1992257	ref|NM_007457|ens|ENSMUST00000111080|gb|AK002225|gb|M62418	Ap1s1	-3.939
A_55_P1978441	ref|NM_008443|ens|ENSMUST00000108954|ens|ENSMUST00000132653|ens|ENSMUST00000120613	Kif3a	-3.939
A_55_P1963124	nap|NAP061945-1	NAP061945-1	-3.937
A_55_P2178201	ref|NM_025793|ens|ENSMUST00000106110|ens|ENSMUST00000136797|ens|ENSMUST00000137230	Wdr45l	-3.937
A_52_P598605	ens|ENSMUST00000169233|gb|AK147626|gb|AK163736|gb|AK020715	Ptch1	-3.934
A_55_P1961620	ref|NM_011912|ens|ENSMUST00000037807|gb|Y17792|gb|AF028715	Vax2	-3.931
A_55_P2179069	Unknown	A_55_P2179069	-3.931
A_55_P2069579	Unknown	A_55_P2069579	-3.923
A_30_P01025845	Unknown	chr10:81615171-81615810_F	-3.923
A_55_P2081253	ref|NM_023689|ref|NM_001252620|ref|NM_001252621|ens|ENSMUST00000119068	Spock3	-3.923
A_55_P2260052	gb|AK131895|riken|2210413J24	Gm17753	-3.92
A_30_P01024761	Unknown	chr5:15146475-15170100_F	-3.918
A_55_P2082185	Unknown	A_55_P2082185	-3.915
A_55_P1968505	tc|TC1762818	TC1762818	-3.915
A_55_P1973360	ens|ENSMUST00000080603|ens|ENSMUST00000078393|ref|XM_001475769|ref|XM_003086511	ENSMUST00000080603	-3.91
A_52_P624149	ref|NM_011631|ens|ENSMUST00000020238|ens|ENSMUST00000129178|gb|AK146885	Hsp90b1	-3.907
A_30_P01032207	Unknown	chr1:183951156-183986156_R	-3.907
A_52_P339722	ref|NM_146087|gb|AK180731|gb|AK219793|gb|AK147165	Csnk1a1	-3.904
ETG09_35454	Unknown	ETG09_35454	-3.893
A_55_P2081169	Unknown	A_55_P2081169	-3.893
A_30_P01018760	Unknown	chr15:79764481-79809909_R	-3.893
A_55_P2003043	ref|NM_011030|ens|ENSMUST00000009789|gb|AK030574|gb|BC009654	P4ha1	-3.891
A_66_P133993	ref|XM_286185|ref|XM_911700|nap|NAP097387-001	Gm5093	-3.891
A_55_P2129955	ref|NM_207150|ens|ENSMUST00000099599|gb|BC127964|tc|TC1600764	Olfr1313	-3.888
A_55_P2105819	ens|ENSMUST00000110178|ens|ENSMUST00000161329|nap|NAP101432-1	Wdr67	-3.885
A_55_P2025090	ref|NM_030198|ens|ENSMUST00000034094|gb|AK177395|gb|AK150602	Gins3	-3.883
A_55_P2053733	Unknown	A_55_P2053733	-3.877
A_66_P139088	ens|ENSMUST00000128180|gb|AK080422|gb|BB639734|tc|TC1716203	ENSMUST00000128180	-3.872
A_55_P2073010	ref|NM_001190356|ens|ENSMUST00000072072|ref|XM_001000635|gb|AK139504	Gm4832	-3.869
A_55_P2098591	ref|NM_183287|ens|ENSMUST00000093336|gb|AK012048|gb|AK146836	2610318N02Rik	-3.866
A_55_P2095854	ref|NM_023852|ens|ENSMUST00000022210|ens|ENSMUST00000167824|gb|AK148904	Rab3c	-3.845
A_55_P2052475	Unknown	A_55_P2052475	-3.842
DCP_22_7	Unknown	DCP_22_7	-3.842
A_55_P2014932	ens|ENSMUST00000160698|gb|AK133228|gb|CJ205475|riken|4932419C06	ENSMUST00000160698	-3.842
A_55_P2209273	ens|ENSMUST00000129924|gb|AK006879|tc|TC1695877|riken|1700064E03	ENSMUST00000129924	-3.84
A_55_P1980094	ref|NM_146343|ref|NM_146342|ens|ENSMUST00000080311|ens|ENSMUST00000099756	Olfr1265	-3.837
A_55_P2143376	Unknown	A_55_P2143376	-3.829
A_30_P01021477	Unknown	chr13:99465424-99465644_R	-3.826
A_55_P2088075	tc|TC1626843	TC1626843	-3.824
A_55_P2181084	ref|NM_001002239|ens|ENSMUST00000079716|ref|XM_003085500|ref|XM_001475503	Rpl17	-3.824
A_51_P424499	ref|NM_011660|ens|ENSMUST00000030051|gb|AK007790|gb|X77585	Txn1	-3.824
A_55_P2025635	Unknown	A_55_P2025635	-3.824
A_55_P2041265	ref|NM_144826|ens|ENSMUST00000043152|gb|AK029151|gb|AK161178	Utp6	-3.821
A_30_P01018619	Unknown	chr13:67806242-67830110_R	-3.813
A_55_P2000489	ref|NM_172523|ens|ENSMUST00000086765|ens|ENSMUST00000026084|gb|AK078096	Slc18a2	-3.811
A_55_P1960735	ref|NM_011819|ens|ENSMUST00000110103|ens|ENSMUST00000003808|gb|AK144199	Gdf15	-3.808
A_30_P01031265	Unknown	chr18:32389816-32394927_R	-3.808
A_66_P125161	ref|NR_040774|ens|ENSMUST00000143859|gb|AK132134|riken|3110093C09	1700057H15Rik	-3.797
A_30_P01018236	Unknown	chr4:56480568-56658018_R	-3.795
A_55_P2039694	ens|ENSMUST00000029932|ens|ENSMUST00000059091|gb|AF052746|gb|AK137904	Clca1	-3.792
A_55_P1997421	ref|NM_001082542|ens|ENSMUST00000089628|gb|BC115936|gb|BC146444	Gm5416	-3.784
A_30_P01026412	Unknown	chr1:81632600-81644175_F	-3.779
A_55_P2178423	Unknown	A_55_P2178423	-3.771
A_55_P1964363	ref|NM_001012434|ens|ENSMUST00000050732|gb|AY899809|gb|BC024588	Kctd14	-3.769
A_55_P2125456	nap|NAP112641-1|nap|NAP111127-1	NAP112641-1	-3.758
A_55_P2044413	ref|NM_019494|ref|NR_038116|ens|ENSMUST00000077820|ens|ENSMUST00000122808	Cxcl11	-3.758
A_30_P01024390	Unknown	chr17:80133213-80144417_F	-3.755
A_55_P2169909	ens|ENSMUST00000147899|ens|ENSMUST00000105497|ens|ENSMUST00000144806|gb|BU612454	Ostm1	-3.742
A_30_P01017640	Unknown	chr11:76427968-76435706_R	-3.737
A_55_P2056315	ref|NM_009321|ens|ENSMUST00000046644|gb|AK140276|gb|AK010859	Tbca	-3.735
A_52_P551743	ref|NM_033565|ens|ENSMUST00000167934|ens|ENSMUST00000060945|gb|BC138999	Aff4	-3.735
A_52_P457924	ref|NM_146664|ens|ENSMUST00000050928|gb|BC141029|tc|NP830858	Olfr734	-3.73
A_51_P406077	ref|NM_025363|gb|AK008291|gb|AK009186|gb|BC059710	1110001J03Rik	-3.727
A_55_P2161132	Unknown	A_55_P2161132	-3.727
A_55_P2096797	ref|NM_001040696|ref|NM_001162414|ens|ENSMUST00000136493|gb|DQ153214	Nlrp1b	-3.724
A_52_P164136	ref|NM_001042591|ens|ENSMUST00000099356|ens|ENSMUST00000159690|gb|AK122499	Arrdc3	-3.724
A_51_P463607	ref|NM_177310|gb|AK088324|ens|ENSMUST00000041609|tc|TC1581972	Xpnpep3	-3.722
A_55_P2012627	ref|NR_033455|gb|AK141979|riken|D130079J24	Gm10536	-3.717
A_55_P2153431	ref|NM_009058|ref|NM_001145834|ref|NM_001145835|ref|NM_001145836	Ralgds	-3.717
A_30_P01025609	Unknown	chr10:84010161-84016083_R	-3.714
A_55_P2052472	nap|NAP114787-1	NAP114787-1	-3.711
A_30_P01021702	Unknown	chr8:122788975-122789224_R	-3.709
A_55_P1978466	ref|NM_001100461|ens|ENSMUST00000114540|gb|AK141385|ens|ENSMUST00000152209	Pnma5	-3.706
A_55_P2088755	ref|NM_001048196|ens|ENSMUST00000081007|gb|AK137752|tc|TC1691802	Krtap4-1	-3.694
A_55_P2058467	gb|AK161320|riken|4930403L07	AK161320	-3.694
A_55_P2008896	nap|NAP114945-1	NAP114945-1	-3.691
A_55_P2028568	ref|XM_894578|ref|XM_913528	Gm6993	-3.688
A_55_P2114769	Unknown	A_55_P2114769	-3.681
A_30_P01023652	Unknown	XIST	-3.668
A_55_P2210575	gb|AK080460|riken|A730020G15|nap|NAP118030-1	A830073O21Rik	-3.668
A_30_P01027747	Unknown	chr17:79042382-79051807_F	-3.665
A_30_P01026859	Unknown	chr1:82892851-82943201_R	-3.663
A_55_P2003011	Unknown	A_55_P2003011	-3.66
A_66_P114255	gb|AK081926|tc|TC1597757|riken|C130087L05|nap|NAP015894-001	5930412G12Rik	-3.66
A_55_P2026049	Unknown	A_55_P2026049	-3.658
A_55_P2180680	ref|NM_020288|ens|ENSMUST00000074674|gb|BC146326|gb|BC148811	Olfr749	-3.653
A_55_P2304482	gb|AK053996|tc|TC1611548|riken|E230011F24|nap|NAP088140-1	2700086A05Rik	-3.653
A_55_P2175925	Unknown	A_55_P2175925	-3.653
A_55_P1980631	ref|NM_011496|ens|ENSMUST00000021277|ens|ENSMUST00000108666|gb|AK075951	Aurkb	-3.653
A_30_P01020937	Unknown	chr2:167085700-167117795_R	-3.65
A_55_P2144341	ref|NR_040470|ens|ENSMUST00000172817|gb|BC027672|gb|BC033916	BC033916	-3.645
A_55_P2114697	ref|NM_008103|ens|ENSMUST00000024104|gb|BC066866|gb|AK013651	Gcm1	-3.64
A_55_P1957168	ref|NM_133777|ens|ENSMUST00000079496|gb|AK146276|gb|AK154067	Ube2s	-3.638
A_30_P01021821	Unknown	chr2:153325670-153352170_R	-3.638
A_30_P01019724	Unknown	chr4:89032648-89133273_R	-3.635
A_55_P2098640	ref|NM_053184|ref|NM_001024148|ens|ENSMUST00000147854|ens|ENSMUST00000079811	Ugt2a1	-3.623
A_55_P2079732	ref|NM_001164573|ens|ENSMUST00000169347|ens|ENSMUST00000172328|ens|ENSMUST00000152694	Myo1h	-3.62
A_55_P2137853	Unknown	A_55_P2137853	-3.605
A_55_P2100155	ref|NM_001038609|ref|NM_010838|ens|ENSMUST00000106992|gb|AK147636	Mapt	-3.605
A_30_P01025723	Unknown	chr1:107866276-107887102_F	-3.605
A_55_P2176260	nap|NAP094054-001	NAP094054-001	-3.603
A_52_P351882	ref|NM_177730|gb|AK045511|gb|BC048776|gb|AK003208	Impad1	-3.603
A_55_P2086741	ens|ENSMUST00000141604|ens|ENSMUST00000136716|ens|ENSMUST00000114138	Fam3a	-3.583
A_55_P1965402	ref|NM_026219|ens|ENSMUST00000021993|ref|XM_003084461|gb|AK008945	Uqcrb	-3.58
A_30_P01020374	Unknown	chr8:111766396-111772271_F	-3.578
A_55_P2153116	gb|AF138745|tc|TC1643100	Tsix	-3.578
A_55_P2027230	Unknown	A_55_P2027230	-3.573
A_55_P1978905	ens|ENSMUST00000085379|nap|NAP019752-001	ENSMUST00000085379	-3.573
A_51_P349888	ref|NM_007449|ens|ENSMUST00000051274|gb|BC140357|gb|BC146501	Ang2	-3.573
A_55_P1981830	Unknown	A_55_P1981830	-3.573
A_51_P185627	ref|NM_172412|ens|ENSMUST00000162909|ens|ENSMUST00000159689|ens|ENSMUST00000161984	Gpc2	-3.57
A_55_P1984861	nap|NAP018250-001	NAP018250-001	-3.568
A_55_P2131433	Unknown	A_55_P2131433	-3.568
A_55_P1971619	nap|NAP114307-1	NAP114307-1	-3.565
A_55_P1993365	Unknown	A_55_P1993365	-3.555
A_30_P01027558	Unknown	chr7:99879368-99889978_F	-3.548
A_30_P01023356	Unknown	chr16:11024315-11055740_F	-3.548
A_30_P01026593	Unknown	chr6:86480265-86481192_F	-3.546
A_55_P2110743	ref|NM_199477|ens|ENSMUST00000088142|gb|BC090971|gb|AB253944	Mettl7a2	-3.543
A_30_P01032026	Unknown	chr13:48576557-48581632_R	-3.543
A_51_P123314	ref|NM_054091|ens|ENSMUST00000099840|gb|AB061229|gb|BC140281	Olfr74	-3.541
A_55_P2049287	Unknown	A_55_P2049287	-3.541
A_30_P01019193	Unknown	chr18:82862340-82875566_F	-3.541
A_55_P2098727	Unknown	A_55_P2098727	-3.538
A_55_P2308117	gb|AK009506|tc|NP745049|riken|2310026I22|nap|NAP090730-1	2310026I22Rik	-3.531
A_55_P2180854	ref|NM_203492|ens|ENSMUST00000058092|gb|BC100302|tc|TC1589858	Mrgprg	-3.526
A_55_P2082986	ref|NM_010439|ref|NR_033589|ens|ENSMUST00000084171|ens|ENSMUST00000093196	Hmgb1	-3.523
A_55_P2151066	gb|AK008891|tc|TC1610161|riken|2210411A11|nap|NAP091152-1	2210411A11Rik	-3.523
A_55_P1986185	nap|NAP096343-001|nap|NAP111476-1|nap|NAP096354-001|nap|NAP096299-001	NAP096343-001	-3.521
A_55_P2110177	nap|NAP114740-1	NAP114740-1	-3.519
A_55_P2076772	ref|NM_022310|ref|NM_001163434|ens|ENSMUST00000100171|ens|ENSMUST00000028222	Hspa5	-3.519
A_55_P2064901	Unknown	A_55_P2064901	-3.516
A_55_P2133661	Unknown	A_55_P2133661	-3.509
A_55_P1970385	Unknown	A_55_P1970385	-3.506
A_55_P2049856	ref|NM_001159645|gb|AK010060|gb|AB158252|gb|AK039044	Araf	-3.506
A_55_P2180096	ref|NR_003373|gb|X80699|gb|NM_001178039|tc|TC1671121	Gm15772	-3.504
A_30_P01031878	Unknown	chr3:87575891-87576343_F	-3.504
A_55_P2115318	ref|NM_174993|ref|NM_001166619|ref|NM_001166620|ens|ENSMUST00000071848	Fmr1nb	-3.499
A_52_P428446	ref|NM_011650|ens|ENSMUST00000027623|gb|AF234179|gb|AK165598	Tsn	-3.494
A_55_P2110671	Unknown	A_55_P2110671	-3.487
A_55_P1973548	Unknown	A_55_P1973548	-3.473
A_55_P2131481	Unknown	A_55_P2131481	-3.473
A_55_P1970745	nap|NAP114532-1|nap|NAP111093-1|nap|NAP111099-1|nap|NAP112273-1	NAP114532-1	-3.463
A_51_P434198	ref|NM_024213|ens|ENSMUST00000144574|ens|ENSMUST00000138629|ens|ENSMUST00000031072	Anapc4	-3.456
A_55_P1984381	ref|NM_177786|ens|ENSMUST00000049780|gb|AK136321|gb|AK078771	Depdc5	-3.456
A_55_P1975181	ref|NM_025421|ens|ENSMUST00000117138|ens|ENSMUST00000008966|gb|AK004176	Acyp1	-3.456
A_55_P2016968	Unknown	A_55_P2016968	-3.453
A_55_P2087900	nap|NAP028341-1	NAP028341-1	-3.451
A_55_P2172233	Unknown	A_55_P2172233	-3.449
A_55_P2116802	nap|NAP000020-007	NAP000020-007	-3.446
A_30_P01025012	Unknown	chr9:31390809-31591204_F	-3.444
A_66_P108088	tc|NP063432	NP063432	-3.434
A_55_P2184385	Unknown	A_55_P2184385	-3.432
A_55_P2008898	Unknown	A_55_P2008898	-3.43
A_55_P2086087	ref|XM_003085500|nap|NAP112565-1|nap|NAP093899-001|nap|NAP093977-001	Rpl17-ps1	-3.425
A_55_P2045777	nap|NAP095730-001	NAP095730-001	-3.422
A_55_P2169135	nap|NAP113691-1	NAP113691-1	-3.418
A_55_P2091626	Unknown	A_55_P2091626	-3.413
A_55_P1986568	ref|NM_001205032|ref|XM_003085689	Gm19402	-3.413
A_52_P407796	ref|NM_008618|ens|ENSMUST00000102874|gb|AK008270|gb|AK002404	Mdh1	-3.411
A_66_P135694	Unknown	A_66_P135694	-3.411
A_55_P2413939	gb|AK018576|gb|BB277633|gb|BB281435|tc|NP740480	9030625G05Rik	-3.406
A_55_P2462377	ref|NM_008740|ens|ENSMUST00000103075|gb|AK153905|gb|AK049281	Nsf	-3.403
A_30_P01022453	Unknown	chr13:23517278-23523756_F	-3.403
A_30_P01026566	Unknown	chr18:6201019-6201758_R	-3.403
A_55_P2091230	nap|NAP113008-1	NAP113008-1	-3.401
A_52_P462949	ref|NM_001038676|ens|ENSMUST00000069740|gb|BC099488|tc|TC1589977	Gm4745	-3.399
A_55_P2181356	ref|NM_009866|ens|ENSMUST00000075190|ref|XM_001472288|gb|D31963	Cdh11	-3.394
A_30_P01030876	Unknown	chr17:88466300-88495175_R	-3.392
A_30_P01018738	Unknown	chr4:73870498-73881323_F	-3.392
A_55_P2156556	nap|NAP112173-1|nap|NAP112209-1|nap|NAP058516-1|nap|NAP112375-1	NAP112173-1	-3.389
A_55_P2053933	ref|NM_008259|ens|ENSMUST00000044380|gb|U44752|gb|BC096524	Foxa1	-3.389
A_55_P1993404	nap|NAP111477-1	NAP111477-1	-3.375
A_52_P658974	ref|XM_358238|ref|XM_910188|nap|NAP102606-1|nap|NAP113047-1	Gm5396	-3.375
A_55_P2162651	ens|ENSMUST00000055088|nap|NAP026464-1	ENSMUST00000055088	-3.364
A_55_P2043782	ref|NM_001039104|ens|ENSMUST00000138074|ens|ENSMUST00000107522|ens|ENSMUST00000107519	Trpm1	-3.361
A_55_P2111237	ref|NM_053102|ens|ENSMUST00000106211|ens|ENSMUST00000082437|gb|AK218207	2014-09-15	-3.359
A_55_P2092983	nap|NAP124043-1	NAP124043-1	-3.357
A_65_P20683	ref|XR_105056|ref|XR_107838|gb|BC147402|gb|AK136050	Gm1070	-3.357
A_55_P2099760	nap|NAP094807-001	NAP094807-001	-3.347
A_55_P2060253	ref|NM_001081019	Gm12657	-3.338
A_55_P2200628	gb|AK014629|riken|4733401D01|nap|NAP073220-1	4733401D01Rik	-3.336
A_30_P01026457	Unknown	chr13:76326228-76332632_R	-3.336
A_55_P2002567	ens|ENSMUST00000077747|nap|NAP111305-1|nap|NAP111327-1|nap|NAP114267-1	Gm9234	-3.333
A_30_P01021753	Unknown	chr5:124697599-124700029_F	-3.333
A_30_P01032549	Unknown	chr17:71242333-71273533_F	-3.331
A_55_P2040988	Unknown	A_55_P2040988	-3.329
A_52_P485891	ref|NM_133365|ens|ENSMUST00000067048|gb|AK034139|tc|TC1613185	Dnahc5	-3.326
A_30_P01025225	Unknown	chr4:33364774-33364898_R	-3.324
A_55_P2136813	gb|AK171768|gb|BC038315|gb|BC099424|tc|TC1610795	1700012B15Rik	-3.32
A_55_P2065958	gb|BY326470	BY326470	-3.317
A_55_P2088251	Unknown	A_55_P2088251	-3.315
A_55_P2084641	Unknown	A_55_P2084641	-3.31
A_55_P2132099	nap|NAP092947-001	NAP092947-001	-3.308
A_55_P2063402	ref|NM_001085528|ref|NM_001161609|ref|NM_001085532|ref|NM_001098840	Gm13271	-3.301
A_52_P650473	nap|NAP027894-1|nap|NAP061282-1	NAP027894-1	-3.297
A_55_P2043459	Unknown	A_55_P2043459	-3.294
A_55_P2193064	gb|AK142114|gb|BB471708|riken|D230040F06	6720473M08Rik	-3.292
A_55_P1970536	Unknown	A_55_P1970536	-3.292
A_55_P2104472	nap|NAP028575-1	NAP028575-1	-3.292
A_55_P2112549	nap|NAP103155-1|nap|NAP113516-1	NAP103155-1	-3.29
A_55_P2056192	nap|NAP111293-1	NAP111293-1	-3.29
A_55_P2065829	ref|NM_199017|ens|ENSMUST00000065291|gb|AK033793|tc|TC1585720	9230110C19Rik	-3.29
A_55_P2094641	ens|ENSMUST00000105918|gb|BC045142	Kcnq1	-3.288
A_55_P2164998	ens|ENSMUST00000165299|ref|XM_908296|nap|NAP026548-1	LOC546711	-3.285
A_66_P116311	ref|NM_008448|ens|ENSMUST00000025083|gb|AK163055|gb|AK151264	Kif5b	-3.274
A_55_P2244360	ref|NR_045390|ens|ENSMUST00000159260|gb|AK021341|tc|TC1618041	D730045A05Rik	-3.269
A_52_P843573	ref|NM_028821|ens|ENSMUST00000110295|ens|ENSMUST00000123491|gb|AK054461	Dnalc1	-3.263
A_55_P2077671	Unknown	A_55_P2077671	-3.242
A_55_P2134236	ref|NM_010446|ens|ENSMUST00000047315|gb|X74937|gb|L10409	Foxa2	-3.242
A_55_P2009042	ens|ENSMUST00000062637|ens|ENSMUST00000169045|ref|XM_003084818|ref|XM_003084432	ENSMUST00000062637	-3.238
A_30_P01018229	Unknown	chr12:21380896-21387071_R	-3.238
A_55_P2088222	ref|NM_001163032|ref|NM_028052|ens|ENSMUST00000112656|ens|ENSMUST00000070323	Synpr	-3.233
A_55_P2013780	nap|NAP059649-1	NAP059649-1	-3.224
A_52_P515869	ref|NM_178615|ens|ENSMUST00000170578|gb|AK035713|gb|AK004310	Rgmb	-3.222
A_30_P01020132	Unknown	chr6:39205913-39248468_F	-3.215
A_55_P1968633	Unknown	A_55_P1968633	-3.213
A_55_P1955827	Unknown	A_55_P1955827	-3.209
A_30_P01027539	Unknown	chr9:88338621-88338923_F	-3.207
A_30_P01033004	Unknown	chr5:100849748-100858532_R	-3.202
A_55_P1979563	ref|NM_146186|ens|ENSMUST00000085760|ens|ENSMUST00000145027|gb|AK154592	Wdr62	-3.198
A_51_P247393	ens|ENSMUST00000140820|ens|ENSMUST00000155075|gb|AK029726|gb|AK033851	9330101J02Rik	-3.195
A_52_P146457	nap|NAP111270-1|nap|NAP093888-001	NAP111270-1	-3.195
A_30_P01018752	Unknown	chr4:11899775-11931875_R	-3.195
A_52_P384134	gb|AK049968|ens|ENSMUST00000119792|tc|TC1630938|riken|C630034H22	Anapc7	-3.195
A_51_P211423	gb|AK021199|ens|ENSMUST00000108934|tc|TC1590493|riken|C330013J21	C330013J21Rik	-3.191
A_55_P2065501	ref|NM_011279|ens|ENSMUST00000057500|gb|AK002628|gb|AK003248	Rnf7	-3.187
A_55_P1969242	Unknown	A_55_P1969242	-3.182
A_55_P2038627	Unknown	A_55_P2038627	-3.18
A_66_P134252	ref|XM_001474505|ref|XM_001476039|nap|NAP026882-1	Gm12471	-3.18
A_55_P2034663	ref|NM_007781|ens|ENSMUST00000096678|ens|ENSMUST00000096356|gb|AK155626	Csf2rb2	-3.178
A_55_P1955159	ref|NM_025746|ens|ENSMUST00000073179|gb|BC115556|gb|AK016819	4933415F23Rik	-3.171
A_55_P1979126	ref|NM_009446|ens|ENSMUST00000088246|gb|BC089547|tc|TC1680129	Tuba3a	-3.169
A_55_P2046245	ref|NM_008235|ens|ENSMUST00000023171|gb|AK132536|gb|AK133538	Hes1	-3.167
A_55_P1962509	ref|NM_015770|ens|ENSMUST00000029123|ens|ENSMUST00000109697|ens|ENSMUST00000148300	a	-3.167
A_30_P01029540	Unknown	chr1:134171292-134176062_R	-3.165
A_55_P2104587	Unknown	A_55_P2104587	-3.165
A_55_P2106440	Unknown	A_55_P2106440	-3.162
A_51_P352411	ref|NM_026149|ref|NM_001113554|ens|ENSMUST00000038719|gb|AK077673	Nudcd1	-3.16
A_55_P2114838	Unknown	A_55_P2114838	-3.158
A_55_P2103952	ens|ENSMUST00000163885|ens|ENSMUST00000166928|ens|ENSMUST00000170613|ens|ENSMUST00000168088	ENSMUST00000163885	-3.158
A_55_P2164218	nap|NAP111474-1	NAP111474-1	-3.151
A_55_P1974780	Unknown	A_55_P1974780	-3.149
A_30_P01025536	Unknown	chr11:97505439-97522274_F	-3.149
A_51_P488768	ref|NM_178696|ref|NM_001145876|ref|NM_001145877|ref|NR_027357	Slc25a44	-3.143
A_55_P2002975	ref|NM_205795|ens|ENSMUST00000094388|gb|BC107202|gb|BC107203	Mrgprb4	-3.136
A_55_P2170139	ref|NM_053075|ens|ENSMUST00000030787|gb|AB039919|gb|AK151213	Rheb	-3.134
A_55_P2067221	ens|ENSMUST00000051049|ens|ENSMUST00000129815|gb|AK147351|tc|TC1678812	Iqsec3	-3.132
A_30_P01031059	Unknown	chr2:135472670-135484220_R	-3.13
A_51_P423518	ref|NM_175007|ens|ENSMUST00000003345|gb|AK132168|gb|BC043718	Amph	-3.117
A_55_P1962568	nap|NAP061224-1	NAP061224-1	-3.114
A_55_P2019190	Unknown	A_55_P2019190	-3.11
A_55_P2003973	Unknown	A_55_P2003973	-3.11
A_55_P1973779	ref|NM_201607|ens|ENSMUST00000110095|ens|ENSMUST00000034307|gb|AK149514	Pde4c	-3.106
A_55_P1956728	nap|NAP059691-1|nap|NAP060602-1	NAP059691-1	-3.102
A_30_P01030798	Unknown	chr13:15947521-15999246_F	-3.099
A_55_P2171177	ref|NM_177765|gb|AM690757|gb|AK029565|gb|BC145749	Ttll13	-3.091
A_51_P443475	ref|NM_025392|ens|ENSMUST00000033282|gb|AK003666|gb|AK010684	Bccip	-3.091
A_66_P133642	ens|ENSMUST00000104977|nap|NAP000009-003	ENSMUST00000104977	-3.089
A_55_P2071863	ref|NM_023363|ens|ENSMUST00000100275|gb|BC027798|gb|AK036346	Zfp788	-3.089
A_52_P266132	ref|NM_008013|ens|ENSMUST00000035799|gb|AK036784|gb|AK036402	Fgl2	-3.087
A_55_P2048656	ref|NM_013795|ens|ENSMUST00000043675|ref|XM_001478455|gb|AK009806	Atp5l	-3.084
A_55_P2018116	ref|NM_001101479|ens|ENSMUST00000166505|tc|TC1713314	Pabpc4l	-3.084
A_55_P2049369	ref|NM_146843|ens|ENSMUST00000111576	Olfr1097	-3.08
A_52_P590392	ref|NM_016676|ens|ENSMUST00000021001|gb|AK166010|gb|AK028320	Rab10	-3.076
A_55_P2060793	nap|NAP062435-1	NAP062435-1	-3.076
A_55_P2009812	ref|NM_001081565|ref|NM_001001450|ref|NM_001134226|ref|NM_199066	Ssxb8	-3.065
A_55_P2006385	ref|NM_001037502|ens|ENSMUST00000121912|gb|BC141496|gb|BC148776	Defb28	-3.065
A_30_P01018469	Unknown	chr14:79304650-79345152_R	-3.063
A_55_P2074942	ref|NM_010484|ens|ENSMUST00000021195|ens|ENSMUST00000108402|gb|AK008410	Slc6a4	-3.063
A_55_P2020361	ref|NM_197945|ens|ENSMUST00000045761|ens|ENSMUST00000089561|ens|ENSMUST00000110260	Prosapip1	-3.055
A_52_P427759	nap|NAP029816-1|nap|NAP062445-1	NAP029816-1	-3.046
A_55_P2070936	ref|NM_009186|gb|AK152519|gb|Y08948|gb|AK167544	Tra2b	-3.044
A_30_P01032402	Unknown	chr3:50934868-50939918_R	-3.044
A_55_P2373091	gb|AK039611|gb|AK079662|tc|TC1612050|riken|A330072L02	A330072L02Rik	-3.042
A_55_P2036377	Unknown	A_55_P2036377	-3.04
A_30_P01025589	Unknown	chr14:33115110-33131171_F	-3.038
A_55_P2143081	Unknown	A_55_P2143081	-3.036
A_55_P2090924	ref|NM_001081499|gb|BC051701|gb|AK014817|ens|ENSMUST00000096313	Tbc1d8b	-3.027
A_52_P425092	ens|ENSMUST00000077110|nap|NAP029167-1	ENSMUST00000077110	-3.027
A_55_P1971614	Unknown	A_55_P1971614	-3.025
A_51_P510764	ref|NM_178767|ens|ENSMUST00000049874|gb|AK040702|gb|BY763315	Agmo	-3.025
A_55_P2160663	ref|XR_105543|ref|XR_106814	Gm8327	-3.025
A_55_P2151897	ens|ENSMUST00000085282|ens|ENSMUST00000085365|tc|TC1648390|nap|NAP093433-001	ENSMUST00000085282	-3.025
A_30_P01020864	Unknown	chr10:97196521-97207471_F	-3.025
A_55_P2106956	ref|NR_004447|gb|AK002273|riken|0610007C02	Gm5523	-3.023
A_52_P311031	gb|AK016943|tc|TC1593688|riken|4933427C01|nap|NAP121004-001	Gm9757	-3.023
A_55_P2071846	Unknown	A_55_P2071846	-3.023
A_55_P2049757	nap|NAP112865-1	NAP112865-1	-3.021
A_52_P321627	nap|NAP071933-1|nap|NAP060225-1	NAP071933-1	-3.015
A_55_P2015599	Unknown	A_55_P2015599	-3.013
A_66_P105288	ref|NM_007475|ens|ENSMUST00000086519|gb|AK009767|gb|AK010267	Rplp0	-3.008
A_55_P2044050	ens|ENSMUST00000012921|ens|ENSMUST00000107945	ENSMUST00000012921	-3
A_55_P2181104	ref|NM_001033415|ens|ENSMUST00000087241|gb|AK143290|gb|BC120534	Shisa3	-2.996
A_55_P1998987	nap|NAP104240-1|nap|NAP125448-1	NAP104240-1	-2.99
A_55_P2029111	gb|AK040829|riken|A530028G21|nap|NAP124674-1	AK040829	-2.988
A_30_P01031649	Unknown	chr2:67412478-67412959_F	-2.986
A_55_P2176087	ens|ENSMUST00000099960	Cox11	-2.986
A_30_P01020570	Unknown	chr12:73838608-73862621_F	-2.983
A_55_P2036794	ens|ENSMUST00000130159|gb|DV655295|nap|NAP114078-1	ENSMUST00000130159	-2.983
A_55_P2255944	gb|AK018586|tc|TC1697088|riken|9130002K18|nap|NAP025701-001	9130002K18Rik	-2.983
A_55_P2064038	Unknown	A_55_P2064038	-2.981
A_55_P2176391	Unknown	A_55_P2176391	-2.981
A_55_P2075894	ens|ENSMUST00000054380|ref|XM_356811|nap|NAP020122-001	Gm5215	-2.977
A_66_P125910	Unknown	A_66_P125910	-2.977
A_55_P2056221	nap|NAP095481-001	NAP095481-001	-2.975
A_30_P01030900	Unknown	chr18:5808025-5818625_R	-2.975
A_30_P01019393	Unknown	chr1:121201987-121223410_R	-2.973
A_30_P01031751	Unknown	chr12:3407353-3426580_R	-2.971
A_55_P2117993	gb|AK137058|tc|TC1712032|riken|9430056M06	Cep63	-2.961
A_52_P383653	ref|NM_001033851|ens|ENSMUST00000154569|gb|AK005311|gb|BC076564	Cpne8	-2.959
A_51_P147361	ref|NM_001201390|ref|XM_003086551|ref|XM_003086552|gb|AK054382	E330021D16Rik	-2.959
A_55_P2072906	gb|NM_001177391	Gm6788	-2.959
A_55_P2037689	Unknown	A_55_P2037689	-2.957
A_55_P2039518	ref|XR_106101|ref|XR_107249|gb|AK006139|gb|BU936470	1700019P21Rik	-2.957
A_55_P2025612	ens|ENSMUST00000104958|tc|TC1730939	Psme2	-2.953
A_30_P01029371	Unknown	chr1:88524037-88540731_R	-2.951
A_55_P1999715	ens|ENSMUST00000103291|gb|M97158|tc|TC1698560	ENSMUST00000103291	-2.951
A_55_P1979427	ref|NM_001134458|ref|NM_008374|ens|ENSMUST00000020518|gb|M84746	Il9r	-2.946
A_52_P707503	ref|NM_001164437|ens|ENSMUST00000058077|gb|AK053134|tc|TC1609416	Tmem212	-2.946
A_30_P01021239	Unknown	chr9:24617562-24625262_R	-2.942
A_55_P2073482	ref|XR_104680|ref|XR_107372|nap|NAP000079-001|nap|NAP108483-1	Gm13430	-2.938
A_55_P2161423	ref|NM_016868|ref|NM_001162950|ens|ENSMUST00000094803|ens|ENSMUST00000037762	Hif3a	-2.936
A_51_P378336	ref|NM_172687|ens|ENSMUST00000029909|gb|AK028680|gb|AK142287	Coq3	-2.934
A_55_P2127617	ref|NM_001081227|ens|ENSMUST00000136521|tc|TC1632316	6330403A02Rik	-2.932
A_55_P2175579	ref|NM_146694|ens|ENSMUST00000075868|tc|TC1636706|nap|NAP029402-1	Olfr1466	-2.932
A_30_P01027519	Unknown	chr17:29571806-29603008_F	-2.932
A_51_P497882	ref|NM_030080|ens|ENSMUST00000107369|ens|ENSMUST00000029547|gb|AK088919	Creb3l4	-2.926
A_55_P2106255	ref|NM_134163|tc|TC1623327	Mbnl3	-2.92
A_55_P2167040	ref|NM_027893|ref|NM_001122680|ens|ENSMUST00000006578|gb|AK004821	Pvrl4	-2.92
A_55_P1978258	Unknown	A_55_P1978258	-2.92
A_51_P269404	ref|NM_008030|ens|ENSMUST00000028010|gb|AK149440|gb|U87147	Fmo3	-2.918
A_55_P2177726	ens|ENSMUST00000164544|nap|NAP102419-1	ENSMUST00000164544	-2.916
A_51_P380005	ref|NM_015736|ens|ENSMUST00000028378|gb|AK135489|gb|BC043331	Galnt3	-2.914
A_55_P2296088	ref|NM_001018042|ref|NM_001098425|ens|ENSMUST00000133615|ens|ENSMUST00000066003	Sp3	-2.912
A_30_P01031484	Unknown	chr6:052032838-052033444	-2.91
A_55_P1955244	ref|XM_001000635|nap|NAP114395-1|nap|NAP101990-1	LOC677113	-2.906
A_55_P2006713	ens|ENSMUST00000164001|ens|ENSMUST00000172206|ref|XM_003084735|ref|XM_983891	ENSMUST00000164001	-2.906
A_55_P2130365	gb|AK045380|tc|TC1592524|riken|B230111C05|nap|NAP076511-1	Nup93	-2.904
A_55_P2060722	ref|NM_019490|ens|ENSMUST00000097035|ens|ENSMUST00000031355|gb|AK168433	Uso1	-2.904
A_55_P1959119	Unknown	A_55_P1959119	-2.904
A_55_P2064272	Unknown	A_55_P2064272	-2.904
A_55_P1991911	Unknown	A_55_P1991911	-2.896
A_30_P01028515	Unknown	chr3:19793699-19822899_R	-2.894
A_30_P01028428	Unknown	chr5:121759042-121789992_R	-2.892
A_66_P111840	ref|XM_909282|nap|NAP000009-001	Gm11362	-2.892
A_52_P485450	ref|NM_025418|ens|ENSMUST00000020018|ens|ENSMUST00000100058|ens|ENSMUST00000154132	Vta1	-2.89
A_55_P2421352	gb|AK020298|tc|TC1621681|riken|9130604C24|nap|NAP024010-001	9130604C24Rik	-2.888
A_51_P264825	ref|NM_008479|ens|ENSMUST00000032217|gb|BC120591|gb|X98113	Lag3	-2.884
A_55_P2044922	ref|NM_175669|ens|ENSMUST00000053659|gb|AK033761|tc|TC1591937	Gpr82	-2.882
A_52_P256955	ref|NM_177585|ens|ENSMUST00000063263|gb|AK052136|tc|TC1592225	Iqcj	-2.88
A_51_P393598	ref|NM_023721|ens|ENSMUST00000021536|gb|AK146448|gb|AK165761	Atp6v1d	-2.88
A_55_P2117799	ref|NM_001048146|ens|ENSMUST00000134433|gb|AK134714|gb|AK167783	Azi2	-2.878
A_55_P2042783	ens|ENSMUST00000161216|gb|AK010164|tc|TC1704219|riken|2310075C17	ENSMUST00000161216	-2.878
A_52_P665202	nap|NAP115124-1	NAP115124-1	-2.878
A_30_P01021297	Unknown	chr6:23105525-23118900_R	-2.874
A_30_P01026399	Unknown	chr17:33368400-33393525_F	-2.872
A_55_P2022663	Unknown	A_55_P2022663	-2.87
A_55_P2069730	nap|NAP111933-1	NAP111933-1	-2.87
A_55_P1982449	Unknown	A_55_P1982449	-2.87
A_66_P113599	ens|ENSMUST00000032858|gb|AK006119|gb|AK015592|gb|AK131801	ENSMUST00000032858	-2.868
A_51_P349546	ref|NM_153098|ens|ENSMUST00000093812|gb|AK036799|gb|AK042169	Cd109	-2.864
A_55_P2130576	ens|ENSMUST00000080097|ens|ENSMUST00000073376|ens|ENSMUST00000080223|ref|XM_003084467	ENSMUST00000080097	-2.862
A_66_P103092	ens|ENSMUST00000077111|nap|NAP000030-001	ENSMUST00000077111	-2.86
A_55_P2346619	gb|AK033346|riken|8030498J20	8030498J20Rik	-2.86
A_55_P1968053	nap|NAP111715-1	NAP111715-1	-2.856
A_30_P01028074	Unknown	chr15:92174262-92196074_F	-2.844
A_55_P2004119	Unknown	A_55_P2004119	-2.844
A_55_P2082625	nap|NAP061666-1	NAP061666-1	-2.842
A_30_P01023900	Unknown	chr10:21855725-21867925_R	-2.84
A_55_P2055137	Unknown	A_55_P2055137	-2.838
A_30_P01029029	Unknown	chr7:140081171-140123058_R	-2.838
A_55_P1976471	tc|TC1778268	TC1778268	-2.836
A_55_P1955921	ens|ENSMUST00000077278|nap|NAP093677-001	ENSMUST00000077278	-2.834
A_30_P01018436	Unknown	chr4:136856064-136875614_F	-2.834
A_52_P349143	ref|NM_026854|ref|NM_001170960|ens|ENSMUST00000025383|ens|ENSMUST00000163590	Dtwd2	-2.832
A_55_P2090612	ens|ENSMUST00000110980|gb|AK041413|tc|TC1592525|riken|A630007P20	Pilra	-2.832
A_30_P01023384	Unknown	chr10:81680941-81704964_F	-2.83
A_55_P2005828	ref|NM_008219|ens|ENSMUST00000063957|gb|AK012442|gb|AK012495	Hbb-bh1	-2.828
A_30_P01029442	Unknown	chr19:44653017-44654777_F	-2.826
A_55_P2344798	tc|TC1700796	TC1700796	-2.819
A_55_P2149001	Unknown	A_55_P2149001	-2.819
A_55_P2097072	Unknown	A_55_P2097072	-2.817
A_55_P2055727	ref|NM_053222|ens|ENSMUST00000079832|gb|BC140231|gb|BC141614	Vmn1r52	-2.815
A_30_P01024738	Unknown	chr4:126009815-126015875_F	-2.815
A_55_P2105035	ens|ENSMUST00000058881|ref|XM_357814|ref|XM_003086611|nap|NAP062832-1	ENSMUST00000058881	-2.813
A_55_P2049553	ens|ENSMUST00000081163|ref|XM_621774|nap|NAP114633-1	Gm6003	-2.811
A_55_P2163404	ens|ENSMUST00000073317|ens|ENSMUST00000081993|ens|ENSMUST00000086799|ref|XM_357471	Gm5292	-2.805
A_55_P1990170	nap|NAP111329-1	NAP111329-1	-2.803
A_51_P414927	ref|NM_027388|ref|NM_001077636|ens|ENSMUST00000067058|gb|AK081337	Pigw	-2.801
A_55_P2042833	Unknown	A_55_P2042833	-2.797
A_55_P2032543	ref|NM_001161844|ref|NM_023224|ens|ENSMUST00000043822|ens|ENSMUST00000148416	Cblc	-2.797
A_66_P135403	ens|ENSMUST00000122832|gb|AK135748|tc|TC1588724|riken|7420410H05	AI481877	-2.795
A_52_P299311	nap|NAP060056-1	NAP060056-1	-2.795
A_55_P2118740	Unknown	A_55_P2118740	-2.78
A_52_P248403	nap|NAP101442-1	NAP101442-1	-2.776
A_55_P2377296	ref|NR_040335|ref|NR_040336|ens|ENSMUST00000126467|gb|AK084832	D330050G23Rik	-2.772
A_52_P91235	ref|NM_017367|ens|ENSMUST00000058550|gb|AK152614|gb|AK079476	Ccni	-2.77
A_66_P102581	ref|NM_172300|ens|ENSMUST00000100528|gb|AK077793|gb|BC027266	Ube2z	-2.768
A_55_P2138961	ref|NM_013861|ens|ENSMUST00000114644|ens|ENSMUST00000067888|gb|AK087844	Tpk1	-2.768
A_30_P01019857	Unknown	chr1:194659312-194661407_R	-2.768
A_52_P1135722	ref|NM_001195681|ref|XM_003084780|ref|XM_003086726|nap|NAP069345-1	Gm684	-2.766
A_55_P2000783	ref|NM_015732|ens|ENSMUST00000052915|ens|ENSMUST00000139682|gb|AK049192	Axin2	-2.761
A_55_P2041828	ref|NM_023279|ens|ENSMUST00000071134|gb|AF312873|gb|BC088749	Tubb3	-2.761
A_55_P2045086	Unknown	A_55_P2045086	-2.761
A_55_P2396312	gb|AK015566|riken|4930473H19|nap|NAP074245-1	4930473H19Rik	-2.759
A_55_P2119035	nap|NAP069152-1	NAP069152-1	-2.757
A_55_P2024012	ref|NM_016980|ens|ENSMUST00000071641|ens|ENSMUST00000140659|ens|ENSMUST00000082223	Rpl5	-2.757
A_30_P01022768	Unknown	chr1:182685730-182689074_F	-2.755
A_52_P685511	gb|AK014656|tc|TC1639023|tc|TC1603515|riken|4833405L11	4833405L11Rik	-2.755
A_51_P120785	ens|ENSMUST00000101420|gb|BC127031|gb|BC107020|gb|BC127032	ENSMUST00000101420	-2.743
A_30_P01027545	Unknown	chr3:40439525-40509975_R	-2.743
A_30_P01030772	Unknown	chr17:38132217-38157667_R	-2.738
A_55_P2416464	gb|AK014875|tc|NP742711|riken|4921511I17|nap|NAP073229-1	4921511I17Rik	-2.738
A_51_P279232	ref|NM_028110|ref|NM_001093754|ens|ENSMUST00000061206|gb|AK008546	Dennd2d	-2.738
A_55_P2049005	ref|NM_080434|ens|ENSMUST00000121598|ens|ENSMUST00000034584|gb|AK050280	Apoa5	-2.734
A_55_P2045512	Unknown	A_55_P2045512	-2.734
A_55_P1953411	gb|AK162207|ens|ENSMUST00000137086|tc|TC1647892|riken|7420455C13	Efcab3	-2.734
A_55_P2023953	ref|NM_019824|gb|BC013618	Arpc3	-2.734
A_51_P481221	ref|NM_019517|ens|ENSMUST00000047275|gb|AK004306|gb|AK078770	Bace2	-2.732
A_55_P2045085	ref|NM_001199350|ens|ENSMUST00000081679|ens|ENSMUST00000084445|ref|XM_001478936	Rpl34-ps1	-2.726
A_55_P2074864	Unknown	A_55_P2074864	-2.726
A_30_P01027203	Unknown	chr11:69186873-69187472_F	-2.725
A_55_P2151951	Unknown	A_55_P2151951	-2.725
A_30_P01022321	Unknown	chr9:24307857-24309318_F	-2.723
A_30_P01019676	Unknown	chrX:123306246-123307974_F	-2.721
A_30_P01027970	Unknown	chr13:62580825-62596425_R	-2.721
A_55_P2113768	Unknown	A_55_P2113768	-2.719
A_66_P138585	gb|AK014727|riken|4833419G08|nap|NAP073893-1	4833419G08Rik	-2.719
A_55_P1959628	ref|NM_001110152|ref|NM_001199902|ref|NM_001013369|ens|ENSMUST00000075087	Pfdn4	-2.717
A_55_P2015199	Unknown	A_55_P2015199	-2.717
A_30_P01017468	Unknown	chr11:87841800-87858725_R	-2.713
A_51_P514256	ref|NM_023716|ens|ENSMUST00000075774|gb|AK010786|tc|TC1573221	Tubb2b	-2.708
A_55_P2061515	gb|AK170661|ens|ENSMUST00000115802|riken|F630113C06	Pdxdc1	-2.702
A_55_P2045055	ref|NM_001204252|ref|NM_010796|ens|ENSMUST00000000327|ens|ENSMUST00000153959	Clec10a	-2.7
A_55_P1994289	gb|AK166404|gb|AK082307|gb|XM_003085113|tc|TC1622857	Gm10791	-2.7
A_52_P420500	ref|NM_007771|ens|ENSMUST00000020227|gb|AK133818|gb|AK162460	Cry1	-2.696
A_55_P1993708	ref|NM_172814|ens|ENSMUST00000110305|ens|ENSMUST00000022916|gb|BC039793	Lrp12	-2.696
A_55_P2088945	ref|NM_021387|ens|ENSMUST00000044705|gb|AB030198|gb|AK020370	Vstm2b	-2.694
A_52_P631547	ref|NM_001081106|ens|ENSMUST00000073554|gb|BC063103|gb|AK076770	Cytl1	-2.694
A_55_P2142251	gb|BC015270	Hist2h3c2-ps	-2.693
A_55_P2083894	Unknown	A_55_P2083894	-2.689
A_52_P1164643	gb|AK084195|tc|TC1618244|riken|D230007F04|nap|NAP085806-1	AK084195	-2.687
A_55_P1962661	ref|NM_001024719|ens|ENSMUST00000067328|gb|AK149389|gb|BC092260	Cyp2c67	-2.687
A_55_P2098802	ref|NM_025352|ens|ENSMUST00000109021|ens|ENSMUST00000156503|ens|ENSMUST00000061326	Uqcrq	-2.685
A_55_P2154744	tc|TC1658734	TC1658734	-2.683
A_52_P8251	ens|ENSMUST00000094969|gb|AK015743|riken|4930510I22|nap|NAP124357-1	ENSMUST00000094969	-2.681
A_55_P1996421	nap|NAP112543-1	NAP112543-1	-2.681
A_55_P1969710	nap|NAP068561-1	NAP068561-1	-2.678
A_30_P01020003	Unknown	chr14:77511189-77522852_F	-2.678
A_55_P2030194	ref|NM_010505|ens|ENSMUST00000102804|gb|BC120910|gb|BC120911	Ifna5	-2.678
A_55_P2004551	ref|NM_016659|ens|ENSMUST00000080955|ens|ENSMUST00000032288|gb|BC140968	Klra1	-2.674
A_51_P388325	ref|NM_009904|ens|ENSMUST00000109831|gb|D86323|gb|U08373	Clgn	-2.674
A_66_P113556	ref|NM_053116|gb|BC115811|gb|BC115925|gb|AK054110	Wnt16	-2.67
A_55_P2016287	ref|NM_013837|ref|NM_001130476|ens|ENSMUST00000040721|ens|ENSMUST00000118993	Tpst1	-2.667
A_30_P01020218	Unknown	chr10:83364590-83364873_F	-2.667
A_55_P2333126	gb|AK088506|gb|AK054352|gb|AK045615|tc|TC1583862	E330018D03Rik	-2.661
A_55_P2109222	gb|AK146165|gb|BF166378|tc|TC1696761|tc|TC1631323	Rps3	-2.659
A_30_P01032023	Unknown	chr15:96032592-96116907_F	-2.656
A_30_P01021270	Unknown	chr2:75496518-75496992_R	-2.654
A_55_P1974602	ref|NM_001042557|ens|ENSMUST00000052385|ens|ENSMUST00000110999|ens|ENSMUST00000129866	Map2k7	-2.65
A_55_P2071374	ref|NM_001166842|ens|ENSMUST00000098704	Vmn1r168	-2.646
A_55_P2130418	gb|AK153738|gb|AK158244|riken|A630066K19|riken|F930045I16	Gm10565	-2.645
A_55_P2068157	Unknown	A_55_P2068157	-2.643
A_30_P01018506	Unknown	chr9:113648970-113715170_R	-2.643
A_30_P01030964	Unknown	chrX:58343629-58372091_F	-2.643
A_55_P1970324	Unknown	A_55_P1970324	-2.639
A_55_P2055123	ref|NM_001113478|ref|NM_009146|ens|ENSMUST00000040260|gb|AK162693	Frrs1	-2.639
A_55_P1988723	ref|XR_105450|gb|AK135500|riken|6820437L16	Gm5953	-2.639
A_55_P2127179	nap|NAP023935-001	NAP023935-001	-2.63
A_55_P2183318	Unknown	A_55_P2183318	-2.628
A_55_P2141585	tc|TC1597894|nap|NAP121919-001	TC1597894	-2.624
A_55_P1968763	ref|NM_199022|ens|ENSMUST00000110480|ens|ENSMUST00000042246|gb|AK148576	Shc4	-2.624
A_55_P1985689	Unknown	A_55_P1985689	-2.624
A_55_P2053798	Unknown	A_55_P2053798	-2.624
A_52_P445474	ref|NM_001081109|ens|ENSMUST00000041804|gb|AK013633|gb|AK129279	Lmtk2	-2.621
A_52_P671812	nap|NAP000123-003	NAP000123-003	-2.615
A_30_P01031192	Unknown	chr6:52046805-52072744_R	-2.615
A_30_P01027446	Unknown	chr8:41934312-41945487_F	-2.614
A_55_P2056260	tc|TC1725193	TC1725193	-2.614
A_55_P2053281	ens|ENSMUST00000172100|gb|AK144159|gb|AK166742|gb|AK166824	ENSMUST00000172100	-2.614
A_55_P2166884	ens|ENSMUST00000090234|ref|XM_484529|ref|XM_909990|nap|NAP096376-001	Gm5481	-2.614
A_55_P2131340	ref|NM_206534|ens|ENSMUST00000110399|ens|ENSMUST00000041262|gb|BC076499	Churc1	-2.612
A_55_P2387104	gb|AK015209|gb|AV261947|tc|TC1618374|riken|4930427C17	4930471M09Rik	-2.612
A_55_P2006366	nap|NAP106421-1	NAP106421-1	-2.612
A_30_P01031000	Unknown	chr10:39383665-39442690_F	-2.612
A_51_P245102	ens|ENSMUST00000041998|gb|AK019837|gb|AK019836|tc|TC1592317	ENSMUST00000041998	-2.608
A_30_P01029266	Unknown	chr3:70581406-70614856_R	-2.606
A_55_P2132805	ref|NM_001081267|ens|ENSMUST00000042399|gb|AK021117|ens|ENSMUST00000107153	Rsf1	-2.606
A_55_P1984413	ref|XM_003085058|ref|XM_003085956|gb|AK040251|tc|TC1591739	Gm9948	-2.606
A_30_P01030508	Unknown	chr5:33779273-33780113_R	-2.604
A_55_P2235958	ens|ENSMUST00000079186|tc|TC1638179	ENSMUST00000079186	-2.604
A_30_P01023736	Unknown	chr5:125205454-125209470_F	-2.604
A_55_P2017894	ref|NM_009307|gb|AK036357|tc|TC1587594|tc|TC1686828	Syt2	-2.599
A_52_P639751	ref|NM_001033785|ens|ENSMUST00000046557|gb|BC147265|gb|BC147494	Akap14	-2.599
A_30_P01027312	Unknown	chr17:27012442-27024356_F	-2.599
A_30_P01026381	Unknown	chr14:33975934-33998694_R	-2.597
A_55_P1955627	ref|NM_001114385|ens|ENSMUST00000063029|ens|ENSMUST00000112878|gb|BC050818	Chrdl1	-2.594
A_66_P102163	Unknown	A_66_P102163	-2.594
A_55_P1975355	gb|AK135037|riken|6430550P15	C030010C08Rik	-2.594
A_55_P1969885	Unknown	A_55_P1969885	-2.586
A_55_P2092262	ref|NM_001198955|ens|ENSMUST00000111345	Gm7694	-2.586
A_55_P1996008	ens|ENSMUST00000099000|ens|ENSMUST00000099029|ens|ENSMUST00000108986|ens|ENSMUST00000153210	ENSMUST00000099000	-2.586
A_55_P1955587	ref|NM_010477|ens|ENSMUST00000027123|gb|X53584|gb|AK143882	Hspd1	-2.583
A_55_P1973531	gb|AK135819|riken|7420422B15	Gm10763	-2.583
A_66_P129469	ens|ENSMUST00000167989|ref|XM_485041|ref|XM_916856|nap|NAP111833-1	ENSMUST00000167989	-2.579
A_55_P2169371	ens|ENSMUST00000098634|gb|AK035639|tc|TC1593254|riken|9530080C08	ENSMUST00000098634	-2.576
A_30_P01017981	Unknown	chr4:128060015-128075590_R	-2.576
A_55_P2061899	Unknown	A_55_P2061899	-2.574
A_52_P42069	ref|NM_021381|ens|ENSMUST00000050887|gb|AK156734|gb|AK134279	Prokr1	-2.574
A_55_P2083405	Unknown	A_55_P2083405	-2.57
A_55_P2187220	ref|NM_183166|ens|ENSMUST00000050375|ens|ENSMUST00000108011|ens|ENSMUST00000164422	Gm4884	-2.57
A_30_P01032711	Unknown	chr18:57104718-57105355_F	-2.569
A_51_P159293	ref|NM_172515|ens|ENSMUST00000107778|gb|AK029899|gb|AK133102	Zbbx	-2.567
A_55_P2015173	nap|NAP115224-1	NAP115224-1	-2.567
A_55_P1977802	ref|NM_176807|ref|NM_022888|ens|ENSMUST00000069400|ens|ENSMUST00000170775	Folr4	-2.565
A_30_P01025657	Unknown	chr13:73472571-73483846_F	-2.563
A_55_P2118609	ref|NM_011371|ens|ENSMUST00000009732|gb|Y11274|tc|TC1592196	St6galnac1	-2.563
A_55_P2142668	Unknown	A_55_P2142668	-2.562
A_55_P1982744	ens|ENSMUST00000089904|ens|ENSMUST00000097222|ref|XM_003084742|nap|NAP062435-1	ENSMUST00000089904	-2.562
A_55_P2128646	ref|NM_020567|ens|ENSMUST00000006898|ens|ENSMUST00000110382|gb|AF068780	Gmnn	-2.56
A_30_P01023832	Unknown	chr18:36470130-36489110_R	-2.558
A_66_P132969	ref|XR_106240|nap|NAP101287-1	Gm12618	-2.554
A_55_P2278093	gb|AK148445|gb|BB222719|riken|C820001A05	AI480461	-2.551
A_55_P2186205	ref|NM_025432|ens|ENSMUST00000116495|ens|ENSMUST00000112194|gb|AK007889	Trappc2	-2.551
A_51_P275642	ens|ENSMUST00000103459|gb|FM179587|gb|JF690484|gb|JF690567	ENSMUST00000103459	-2.551
A_55_P2081925	ref|NM_013843|gb|AK030965|gb|BB032495|tc|TC1583196	Zfp53	-2.551
A_52_P6828	ref|NM_023500|ens|ENSMUST00000015486|gb|BC054851|tc|TC1622655	Xk	-2.549
A_30_P01022689	Unknown	chr8:106037800-106070025_F	-2.549
A_30_P01027016	Unknown	chr9:81537835-81583227_R	-2.547
A_55_P2062004	tc|TC1773384	TC1773384	-2.547
A_55_P1994290	gb|AK082307|gb|XM_003085113|tc|TC1622857|riken|C230036B22	AK082307	-2.546
A_52_P284821	ref|NM_172658|ens|ENSMUST00000071985|gb|BC119022|gb|AK049253	Slco4c1	-2.544
A_55_P2021345	ens|ENSMUST00000140450	ENSMUST00000140450	-2.54
A_55_P2007457	ref|NM_028801|ens|ENSMUST00000165147|ens|ENSMUST00000166675|ens|ENSMUST00000084424	Muc5b	-2.533
A_55_P2079158	ref|NM_177894|ens|ENSMUST00000056728|gb|AK051095|tc|TC1592266	Fam154b	-2.532
A_55_P1988246	nap|NAP113539-1	NAP113539-1	-2.532
A_66_P137516	ens|ENSMUST00000086964|ref|XM_003086174|nap|NAP020612-001	LOC100505285	-2.532
A_55_P2210011	ens|ENSMUST00000162204|gb|AK036810|tc|TC1580064|riken|9930013M16	Heatr7a	-2.528
A_55_P2170539	tc|TC1642954	TC1642954	-2.528
A_55_P2422164	gb|AI851140|tc|TC1597947	C130093G08Rik	-2.528
A_55_P2007640	ref|NM_029735|ens|ENSMUST00000046514|gb|X54327|gb|AK166460	Eprs	-2.526
A_30_P01029412	Unknown	chr15:92667158-93020682_R	-2.526
A_55_P2048588	ref|NM_007659|ens|ENSMUST00000119827|ens|ENSMUST00000020099|gb|U58633	Cdk1	-2.526
A_55_P2257251	ref|NR_045381|gb|AK015461|tc|NP742346|riken|4930455D15	4930455D15Rik	-2.523
A_30_P01025476	Unknown	chr2:25182970-25188091_R	-2.521
A_30_P01032956	Unknown	chr5:92548501-92566401_R	-2.521
A_55_P2047967	ref|NM_025976|ref|NM_001177552|ens|ENSMUST00000069281|ens|ENSMUST00000023365	Bfar	-2.516
A_55_P2065249	ens|ENSMUST00000043966|gb|AK014764|tc|TC1590793|tc|TC1638364	Mrpl47	-2.514
A_66_P130916	ref|NM_010389|ens|ENSMUST00000069091|gb|BC100709|gb|BC127027	H2-Ob	-2.512
A_55_P1980401	ref|NM_144811|ens|ENSMUST00000109616|gb|AK045714|gb|AK005457	Cbx7	-2.512
A_55_P1999078	Unknown	A_55_P1999078	-2.507
A_55_P2370337	gb|AK018390|riken|8430406P12	8430406P12Rik	-2.505
A_30_P01019656	Unknown	chr1:185808525-185826139_F	-2.505
A_52_P204311	ref|NM_011898|ens|ENSMUST00000025295|gb|AK034201|gb|BC050944	Spry4	-2.504
A_30_P01018930	Unknown	chr3:88009045-88036270_R	-2.502
A_55_P2086912	ref|XM_001478804|ref|XM_003086844|nap|NAP020393-001	Gm14816	-2.5

## Sheet: Table S2
Table S2. Genes up-regulated ≥2.5 fold in the cerebellum of male pups from mothers having FA supplementation during gestation at 20 mg/kg in comparison to mothers at 2 mg/kg diet.
UniqueID	Accession	Symbol	Fold Change
A_55_P2079806	ref|NM_146773|ens|ENSMUST00000072914|gb|BC130241|tc|TC1642234	Olfr508	100
A_30_P01020164	Unknown	chr5:108538417-108550517_F	90.9091
A_30_P01033442	Unknown	chr18:63226635-63227111_R	12.8205
A_30_P01028813	Unknown	chr1:81854900-81906900_F	12.1951
A_55_P2136164	Unknown	A_55_P2136164	12.0482
A_30_P01029701	Unknown	chr17:84895250-84908450_F	10.6383
A_55_P1982747	ref|NM_080440|ref|NM_001167920|ens|ENSMUST00000085238|ens|ENSMUST00000064594	Slc8a3	10
A_55_P2007699	ref|NM_028016|ens|ENSMUST00000112580|ens|ENSMUST00000112581|ens|ENSMUST00000012540	Nanog	8.92857
A_55_P2174198	ref|NM_175656|gb|BC092144	Hist1h4i	8.77193
A_55_P2005903	ref|NM_008500|ref|NM_001083125|ref|NM_001083126|ref|NM_001083127	Lhx6	8.54701
A_30_P01017476	Unknown	chr5:123440192-123451767_R	8.33333
A_55_P2002792	ref|NM_007887|ens|ENSMUST00000067695|gb|U41636|tc|TC1596559	Dub1	8
A_55_P2091294	ref|NM_001005247|ref|NM_001005248|ref|NM_001167864|ens|ENSMUST00000107649	Hps5	7.87402
A_55_P1956547	ref|NM_001146330	Gpr52	7.69231
A_55_P1988065	ref|NR_038014|gb|AK144329|tc|TC1675562|riken|G630022P05	Gm17745	7.69231
A_55_P2320263	gb|CX236116|tc|TC1681691	C030007I01Rik	7.63359
A_30_P01024107	Unknown	chrX:20378510-20379091_F	7.0922
A_52_P534235	ref|NM_011481|ens|ENSMUST00000163234|ens|ENSMUST00000016498|gb|BC120633	Srms	7.04225
A_30_P01025328	Unknown	chrX:50087925-50101700_R	6.89655
A_55_P1954067	ref|NM_001205234|ref|NM_020253|ref|NM_001205235|ens|ENSMUST00000154580	Nrxn2	6.80272
A_55_P2091756	ref|NM_145598|ens|ENSMUST00000163659|ref|XM_001478485|tc|TC1609795	Nxnl1	6.80272
A_30_P01020232	Unknown	chr2:175374875-175465550_F	6.75676
A_55_P2174736	ref|XR_106548|ref|XR_105368	Gm3515	6.45161
A_66_P117933	ref|NM_001005858|gb|AK077243|ens|ENSMUST00000076249|riken|5031412D17	I830012O16Rik	6.13497
A_51_P206489	ref|NM_080433|ens|ENSMUST00000022262|gb|AK019996|gb|AB042399	Fezf2	6.0241
A_30_P01019837	Unknown	chr4:53315503-53316050_F	5.98802
A_55_P2120324	ref|NM_001003666|ref|NM_183027|ref|NR_033621|ens|ENSMUST00000049705	Zfp457	5.98802
A_55_P1970287	ref|NM_001163730|ref|NM_148949|ens|ENSMUST00000076768|ens|ENSMUST00000094413	Gm9125	5.95238
A_55_P2164524	ref|NM_001033813|gb|AK137156|tc|TC1591246|riken|9530015I07	Zfp872	5.95238
A_30_P01025015	Unknown	chr5:14988715-14989311_F	5.91716
A_55_P2138100	ens|ENSMUST00000099050|ens|ENSMUST00000099049|ens|ENSMUST00000099051|ens|ENSMUST00000099047	ENSMUST00000099050	5.88235
A_52_P554650	ref|NM_010372|ens|ENSMUST00000082093|gb|BC165974|gb|BC145434	Gzmd	5.84795
A_55_P2393734	gb|AK016863|riken|4933421H12	4933421H12Rik	5.84795
A_55_P2100222	gb|AK031311|tc|TC1594633|riken|6030405G12|nap|NAP075553-1	Gm5433	5.81395
A_52_P138806	ref|NM_198618|ens|ENSMUST00000106094|ens|ENSMUST00000046659|gb|AK158868	Dlgap3	5.81395
A_30_P01018551	Unknown	chr1:115829055-115854155_R	5.81395
A_55_P2075237	ref|NM_027895|ref|NM_025563|ref|NM_178589|ref|NM_026696	Ulk3	5.78035
A_30_P01027915	Unknown	chr19:54011403-54018978_F	5.74713
A_55_P2167447	ref|NM_001039551|ref|NM_053186|ens|ENSMUST00000097776|ens|ENSMUST00000001166	Cnnm3	5.64972
A_30_P01027897	Unknown	chr12:72103832-72116875_F	5.64972
A_55_P2142103	gb|BC030479|tc|TC1621602	BC030479	5.61798
A_55_P2082979	ref|NM_172161|ref|NM_001113553|ens|ENSMUST00000059286|ens|ENSMUST00000089022	Irak2	5.52486
A_55_P2047599	ref|NM_133796|ens|ENSMUST00000067936|ens|ENSMUST00000106197|gb|AK075656	Arhgdia	5.52486
A_52_P843948	ref|XM_914998|ref|XM_884978|gb|AK079718|tc|TC1614212	Gm9804	5.49451
A_30_P01021209	Unknown	chr4:148119487-148121143_R	5.49451
A_66_P106334	ens|ENSMUST00000064223|gb|AK035082|riken|9430085I19|nap|NAP078602-1	ENSMUST00000064223	5.43478
A_55_P1978636	ens|ENSMUST00000099035|tc|TC1642683	ENSMUST00000099035	5.43478
A_55_P2163028	ref|NM_010499|ens|ENSMUST00000060427|gb|AK144601|gb|AK150860	Ier2	5.40541
A_51_P278550	ref|NM_134118|ref|NM_027179|ens|ENSMUST00000163837|ens|ENSMUST00000019382	Tecr	5.37634
A_55_P2165554	ens|ENSMUST00000099046|ens|ENSMUST00000099051|ens|ENSMUST00000099047|ens|ENSMUST00000151376	ENSMUST00000099046	5.37634
A_55_P2362931	gb|AY512949|tc|TC1595317	AY512949	5.37634
A_55_P2219189	gb|BG069230	D3Ertd711e	5.31915
A_55_P2047200	Unknown	A_55_P2047200	5.26316
A_55_P1977776	ref|NR_003280|gb|J01871	LOC790956	5.2356
A_66_P124164	ens|ENSMUST00000099683|ens|ENSMUST00000099684|ens|ENSMUST00000170073|ens|ENSMUST00000099046	ENSMUST00000099683	5.20833
A_51_P503937	ref|NM_009790|ens|ENSMUST00000110082|gb|BC018592|gb|BC054805	Calm1	5.20833
A_30_P01028082	Unknown	chr10:97196521-97207471_R	5.20833
A_51_P241319	ref|NM_173385|ens|ENSMUST00000141382|ens|ENSMUST00000048762|ens|ENSMUST00000094637	Cilp	5.12821
A_55_P2039463	ref|NM_024273|ref|NM_007473|ref|NM_176912|ref|NM_001146005	4930455C21Rik	5.12821
A_55_P2066553	ref|NM_177028|ens|ENSMUST00000115097|gb|BC141265|gb|AK030604	5330437I02Rik	5.07614
A_30_P01019138	Unknown	chr14:76912477-76931702_R	5.02513
A_52_P533270	ref|NM_183281|ens|ENSMUST00000067173|gb|BC150914|gb|BC150924	2310005G13Rik	5.02513
A_55_P2091247	gb|BC024703|tc|TC1591692|nap|NAP111427-1|nap|NAP111410-1	3000002C10Rik	5.02513
A_30_P01028227	Unknown	chr18:35967933-35986564_R	5
A_55_P2263877	ref|NR_040645|ens|ENSMUST00000129988|gb|AK018465|tc|NP740535	8430436N08Rik	4.9505
A_55_P1967315	ref|NM_172261|ens|ENSMUST00000038696|gb|AY508450|gb|AK084730	Ppp1r9b	4.90196
A_55_P2007630	ref|NM_144926|ref|NM_001252566|ref|NM_001252567|ens|ENSMUST00000106332	Sez6l2	4.90196
A_30_P01032230	Unknown	chr17:56791549-56803877_R	4.85437
A_30_P01033332	Unknown	chr16:40463859-40464481_R	4.85437
A_55_P2330535	ref|NR_033307|gb|AK077183|tc|TC1615864|riken|4933422K03	4930592I03Rik	4.78469
A_55_P2063795	ref|NM_057171|ref|NM_001252468|ref|NM_001252469|ens|ENSMUST00000087274	Bag6	4.78469
A_55_P1970785	gb|AK140579|gb|AK157539|tc|TC1603916|tc|TC1652722	AK140579	4.78469
A_55_P1984070	ens|ENSMUST00000094104|ens|ENSMUST00000094175|nap|NAP000003-031|nap|NAP059283-1	ENSMUST00000094104	4.7619
A_52_P458249	ref|NM_177593|ens|ENSMUST00000081657|gb|BC037749|tc|TC1591897	Gm4763	4.73934
A_55_P2108451	ref|NM_016722|ref|NM_001193645|ens|ENSMUST00000015171|gb|AK159592	Galns	4.73934
A_51_P357744	ref|NM_010592|ens|ENSMUST00000165353|ens|ENSMUST00000095267|gb|AK131827	Jund	4.73934
A_55_P2003266	ref|NM_183187|ens|ENSMUST00000120411|ens|ENSMUST00000121887|ens|ENSMUST00000036070	Fam107a	4.71698
A_55_P1996181	ref|NM_001103368|ens|ENSMUST00000165834	Vmn2r80	4.69484
A_66_P136364	nap|NAP026415-1|nap|NAP111664-1	NAP026415-1	4.65116
A_51_P194377	ref|NM_021567|ens|ENSMUST00000024260|gb|AK077632|gb|AK004580	Pcbp4	4.56621
A_55_P2062513	ref|NM_018884|ens|ENSMUST00000101117|ens|ENSMUST00000075994|gb|AK173098	Pdzrn3	4.54545
A_66_P113141	gb|AK042438|tc|TC1593591|riken|A630091L03|nap|NAP081983-1	Gm9878	4.52489
A_52_P211956	ref|NM_025658|ens|ENSMUST00000025581|gb|AK008968|gb|AK003110	Ms4a4d	4.4843
A_55_P1972257	ref|NM_011319|ref|NM_001204979|ens|ENSMUST00000102625|ens|ENSMUST00000090553	Sars	4.4843
A_51_P397468	ref|NM_016759|ref|NM_001252347|ens|ENSMUST00000006750|ens|ENSMUST00000146330	Rundc3a	4.4843
A_30_P01027317	Unknown	chr17:27012442-27024356_R	4.42478
A_30_P01019700	Unknown	chr18:3003075-3016150_F	4.42478
A_30_P01032987	Unknown	chr13:66381200-66410200_R	4.40529
A_55_P2328082	ref|NR_040387|gb|AK142074|riken|D230021C23	AI606473	4.38596
A_55_P2261395	ens|ENSMUST00000139621|gb|AK006468|tc|TC1593931|riken|1700028N14	ENSMUST00000139621	4.34783
A_30_P01025819	Unknown	chr3:96205368-96217943_F	4.329
A_30_P01018068	Unknown	chr3:88009045-88036270_F	4.29185
A_55_P2121484	ref|NM_176996|ens|ENSMUST00000001812|gb|AF089721|gb|BC030377	Smo	4.29185
A_55_P1958976	ref|NM_001004157|ens|ENSMUST00000042808|ens|ENSMUST00000123819|gb|AK133477	Scarf1	4.2735
A_30_P01028498	Unknown	chr2:112014068-112049540_F	4.2735
A_55_P2123220	ref|NM_177766|ens|ENSMUST00000043238|ens|ENSMUST00000152080|gb|AK031600	Slc35e1	4.2735
A_55_P2117124	ref|NM_029162|ens|ENSMUST00000114114|tc|TC1630026|tc|TC1735596	Zbtb49	4.25532
A_55_P2139407	ref|NM_023402|ens|ENSMUST00000038446|gb|BC131927|gb|BC131925	Myl12b	4.23729
A_55_P2060107	ref|NM_001253883|ref|NM_011099|ens|ENSMUST00000163694|ens|ENSMUST00000034834	Pkm2	4.20168
A_30_P01023167	Unknown	chr2:104590593-104606218_F	4.1841
A_30_P01026759	Unknown	chr14:49314574-49358174_F	4.16667
A_55_P2058180	ref|NM_001099309	Gm12887	4.09836
A_55_P2081530	ref|NM_080559|ens|ENSMUST00000030651|gb|AK003431|gb|BC008110	Sh3bgrl3	4.09836
A_55_P2149393	Unknown	A_55_P2149393	4.08163
A_30_P01017572	Unknown	chr6:82831236-82841536_F	4.06504
A_52_P191633	ref|NM_001013783|ens|ENSMUST00000063166|gb|AB473727|gb|BC150988	Fam71b	4.06504
A_30_P01029764	Unknown	chr2:94017095-94019092_R	4.04858
A_65_P04847	ref|NM_028572|ens|ENSMUST00000168064|gb|AK031197|tc|TC1599418	Vgll3	4.04858
A_52_P1163890	ref|NR_033556|ens|ENSMUST00000100165|gb|AK041445|gb|AK139693	A630010A05Rik	4.01606
A_66_P136343	gb|AK078603|tc|TC1607882|riken|7030419G21|nap|NAP088573-1	7030419G21Rik	4
A_30_P01029488	Unknown	chr2:173420987-173480087_F	3.98406
A_52_P360330	ref|NM_008634|ens|ENSMUST00000064762|gb|AK141735|gb|AK051573	Mtap1b	3.98406
A_55_P2079973	ens|ENSMUST00000108644|tc|TC1646416|tc|TC1713942	Ndufa3	3.96825
A_30_P01026459	Unknown	chr12:83271350-83357214_F	3.96825
A_55_P2120856	ens|ENSMUST00000066461	ENSMUST00000066461	3.96825
A_55_P2093862	ens|ENSMUST00000099042|ens|ENSMUST00000099056|ens|ENSMUST00000075573|ens|ENSMUST00000099047	ENSMUST00000099042	3.95257
A_55_P2056106	Unknown	A_55_P2056106	3.93701
A_55_P2131752	gb|BY780362	BY780362	3.90625
A_55_P2097329	ens|ENSMUST00000156064|ens|ENSMUST00000137004|gb|AK166391|gb|AK164757	Sgsm3	3.89105
A_30_P01021628	Unknown	chr11:60728207-60745369_R	3.87597
A_30_P01028807	Unknown	chr13:37633225-37640309_F	3.861
A_55_P2035986	ref|NR_033736|ens|ENSMUST00000097535|gb|AK143622|gb|CK030712	E330020D12Rik	3.84615
A_55_P2007106	Unknown	A_55_P2007106	3.83142
A_55_P2129691	ref|NM_001198794|ref|NM_206536|ens|ENSMUST00000086361|ens|ENSMUST00000076326	AB124611	3.81679
A_30_P01019316	Unknown	chr3:62727150-62758225_F	3.81679
A_30_P01019892	Unknown	chr12:19409800-19420825_R	3.81679
A_55_P2185359	ens|ENSMUST00000091621|nap|NAP000003-008	ENSMUST00000091621	3.80228
A_55_P2001336	gb|AK036897|tc|TC1599685|riken|9930022F21|nap|NAP117545-1	Gpr31c	3.78788
A_55_P2148873	ref|NM_009804|ens|ENSMUST00000028610|gb|AK169069|gb|AK128919	Cat	3.77358
A_51_P486681	ref|NM_021492|ens|ENSMUST00000082090|ens|ENSMUST00000147624|gb|AY528675	Ap3b2	3.77358
A_55_P1961567	ref|NM_026875|ref|NM_025347|ens|ENSMUST00000106356|ens|ENSMUST00000170882	Ypel3	3.77358
A_30_P01030593	Unknown	chr4:141527564-141547339_R	3.7594
A_51_P101196	ref|NM_011189|ens|ENSMUST00000174148|ens|ENSMUST00000173544|ens|ENSMUST00000174259	Psme1	3.73134
A_52_P547158	ens|ENSMUST00000060657|gb|AK043505|gb|AK046739|tc|TC1591218	ENSMUST00000060657	3.73134
A_55_P2003369	ref|NM_001199631|ref|NM_001111066|ref|NM_010223|ens|ENSMUST00000119353	Fkbp8	3.71747
A_51_P328652	ref|NM_133348|ref|NM_001146057|ref|NM_001146058|ens|ENSMUST00000030779	Acot7	3.71747
A_55_P2012314	tc|TC1584441	TC1584441	3.71747
A_55_P2063880	ref|NM_001243837|ens|ENSMUST00000110689|nap|NAP026381-1	C7	3.7037
A_30_P01030656	Unknown	chr1:138570107-138632310_R	3.7037
A_51_P268798	ref|NM_134224|ens|ENSMUST00000078642|tc|NP496245|nap|NAP057746-1	Vmn1r202	3.69004
A_30_P01025940	Unknown	chr2:174982600-175005825_R	3.69004
A_30_P01032752	Unknown	chr8:18592437-18593034_R	3.69004
A_55_P2168823	nap|NAP111644-1	NAP111644-1	3.67647
A_55_P2218656	ref|XR_104936|ref|XR_107687|gb|AK006485|tc|TC1615391	1700029E06Rik	3.663
A_55_P2072035	ref|NM_009382|ens|ENSMUST00000114840|gb|BC054436|tc|TC1577066	Thy1	3.64964
A_30_P01030393	Unknown	chr14:14688472-14747272_R	3.64964
A_55_P1970880	ref|NM_147052|ens|ENSMUST00000061055|gb|BC141586|tc|NP646589	Olfr589	3.63636
A_52_P230733	ens|ENSMUST00000095778|gb|AK017287|gb|BE943614|tc|TC1591096	Rcbtb1	3.62319
A_30_P01028123	Unknown	chr9:78107225-78118850_R	3.61011
A_55_P2000964	ref|NM_029901|ens|ENSMUST00000021628|ens|ENSMUST00000074985|gb|AK020439	Akr1c21	3.61011
A_55_P1988009	ens|ENSMUST00000165619|nap|NAP114820-1	ENSMUST00000165619	3.61011
A_52_P108845	ref|NM_001081114|ens|ENSMUST00000014065|gb|BC058124|gb|BC048753	Clip3	3.58423
A_55_P2052465	nap|NAP029844-1	NAP029844-1	3.57143
A_55_P2071322	ens|ENSMUST00000167318|ens|ENSMUST00000172340|nap|NAP114703-1	ENSMUST00000167318	3.57143
A_55_P2317929	ens|ENSMUST00000068730|gb|AK017085|gb|BC049643|tc|TC1594677	ENSMUST00000068730	3.57143
A_55_P2149492	ref|NM_001159934|ref|NM_145228|ens|ENSMUST00000111847|ens|ENSMUST00000171820	Oas1h	3.57143
A_51_P519756	ref|NM_028188|ref|NM_001083807|ref|NM_001083808|ens|ENSMUST00000090929	Rusc1	3.57143
A_55_P2353004	ref|NR_045369|ens|ENSMUST00000161697|gb|AK016253|tc|NP741828	4930568K20Rik	3.55872
A_55_P2097626	Unknown	A_55_P2097626	3.5461
A_55_P2052887	ref|NM_146402|ens|ENSMUST00000099609|tc|TC1599988|nap|NAP101676-1	Olfr1303	3.5461
A_52_P256492	ref|NM_001159507|ens|ENSMUST00000159684|ens|ENSMUST00000162300|ens|ENSMUST00000162293	Grip2	3.5461
A_55_P2183668	ref|XM_003086154|ref|XM_003084438	Vwa3b	3.5461
A_30_P01017817	Unknown	chr2:84344350-84370075_F	3.5461
A_55_P2066598	ref|NM_011012|ref|NM_001252565|ref|NR_045540|ref|NR_045541	Oprl1	3.5461
A_30_P01033370	Unknown	chr17:87492112-87506638_R	3.53357
A_52_P216427	ref|NM_009385|ref|NM_001146198|ens|ENSMUST00000001536|gb|AK136362	Nkx2-1	3.53357
A_55_P2290218	gb|AI853502	AI853502	3.52113
A_55_P2017851	ref|XM_916601	LOC636901	3.52113
A_55_P2017864	ref|NM_146649|ens|ENSMUST00000099839|tc|TC1600205|nap|NAP103251-1	Olfr1160	3.48432
A_55_P2020726	Unknown	A_55_P2020726	3.48432
A_30_P01019849	Unknown	chr9:31834945-32015745_F	3.47222
A_55_P1970234	ref|NM_001195498|ref|NM_001195499|ref|NM_001195496|ref|NM_027539	Dclk2	3.44828
A_30_P01019081	Unknown	chr4:124202159-124202824_F	3.44828
A_30_P01023287	Unknown	chr5:75186625-75186910_F	3.41297
A_30_P01019313	Unknown	chr3:26982754-26983352_R	3.41297
A_55_P2027337	tc|TC1703117	TC1703117	3.40136
A_30_P01022731	Unknown	chr8:60132300-60146830_R	3.37838
A_55_P1983135	gb|AK143785|ens|ENSMUST00000109703|tc|TC1655765|tc|TC1668989	Pxmp4	3.37838
A_30_P01024823	Unknown	chrX:34360500-34388500_F	3.367
A_55_P2222377	gb|BF788177	AA408650	3.367
A_55_P2126855	ref|NM_172831|ens|ENSMUST00000115682|gb|AK087618|tc|TC1595060	E230025N22Rik	3.367
A_30_P01027122	Unknown	chr1:193875525-193978800_R	3.3557
A_55_P2055607	ref|NM_008813|ens|ENSMUST00000039882|gb|AK164619|gb|AK088857	Enpp1	3.3557
A_55_P2085156	nap|NAP065263-1	NAP065263-1	3.3557
A_52_P131353	ref|NM_177343|ens|ENSMUST00000100446|ens|ENSMUST00000114987|ens|ENSMUST00000044009	Camk1d	3.3557
A_51_P247963	ref|NM_027027|ens|ENSMUST00000033756|gb|AK005878|gb|BC061038	Asb9	3.3557
A_30_P01030722	Unknown	chr3:87757295-87774970_R	3.33333
A_55_P2017929	ref|NM_013492|ens|ENSMUST00000022616|gb|L05670|gb|BC075668	Clu	3.33333
A_55_P1959142	Unknown	A_55_P1959142	3.32226
A_55_P2006467	ref|NM_011354|ens|ENSMUST00000134412|ens|ENSMUST00000139253|ref|XM_003085419	Serf2	3.32226
A_55_P2072110	ref|NM_011889|ens|ENSMUST00000116423|ens|ENSMUST00000023095|gb|AK164861	2014-09-03	3.30033
A_30_P01032320	Unknown	chr18:38395600-38407525_R	3.27869
A_55_P2365922	tc|TC1699341	TC1699341	3.27869
A_66_P127024	ref|NM_013595|ens|ENSMUST00000092295|ens|ENSMUST00000105349|ens|ENSMUST00000142997	Mbd3	3.26797
A_30_P01018223	Unknown	chr13:5506700-5519000_F	3.26797
A_55_P2028399	ref|NM_001024842|ens|ENSMUST00000001701|gb|BC139233|gb|BC139269	Hoxc11	3.26797
A_30_P01031369	Unknown	chr6:50339188-50409363_F	3.25733
A_55_P2151278	ref|NM_147001|ref|NM_147000|ens|ENSMUST00000095991|ens|ENSMUST00000049940	Olfr172	3.25733
A_55_P2103927	ens|ENSMUST00000161308|tc|TC1629882	ENSMUST00000161308	3.24675
A_55_P2422650	gb|AK017143|riken|5031425E22|nap|NAP024788-001	5031425E22Rik	3.24675
A_66_P136749	ref|NM_001177858|ens|ENSMUST00000164661|tc|TC1659081|tc|TC1604599	Trim43c	3.23625
A_55_P2136413	Unknown	A_55_P2136413	3.23625
A_30_P01032407	Unknown	chr10:94134000-94149200_F	3.23625
A_52_P305579	ref|NR_033554|gb|AK084778|gb|AK166073|gb|AK038021	D330041H03Rik	3.22581
A_30_P01020151	Unknown	chr3:34497447-34501170_R	3.22581
A_30_P01018137	Unknown	chr9:65368908-65377592_R	3.21543
A_55_P2123907	Unknown	A_55_P2123907	3.20513
A_55_P2213483	gb|C78535	D7Ertd183e	3.20513
A_55_P2063033	ens|ENSMUST00000133439|ens|ENSMUST00000147572|tc|TC1703408|tc|TC1711749	Phc2	3.19489
A_30_P01019000	Unknown	chr13:94194458-94195068_R	3.19489
A_30_P01019878	Unknown	chr12:103151385-103157796_F	3.19489
A_55_P2120961	Unknown	A_55_P2120961	3.19489
A_55_P2175318	ens|ENSMUST00000101405|gb|AK155135|gb|U42384|ens|ENSMUST00000163244	Dfna5	3.18471
A_55_P1964138	ref|NM_013784|ens|ENSMUST00000070699|gb|AK132928|gb|EU234001	Pign	3.1746
A_66_P120380	ref|NM_177820|ref|NM_001143686|ref|NM_001177533|ens|ENSMUST00000089465	Apol10b	3.1746
A_55_P2139191	ref|NM_207142|ref|NM_001011872|ens|ENSMUST00000164985|ens|ENSMUST00000079298	Olfr1036	3.16456
A_30_P01023108	Unknown	chr7:26212709-26230775_F	3.16456
A_30_P01020328	Unknown	chr18:84737058-84737644_F	3.16456
A_66_P125847	ref|NM_139134|ens|ENSMUST00000023568|gb|AK031063|gb|AK076523	Chodl	3.15457
A_55_P2113310	ens|ENSMUST00000023262	ENSMUST00000023262	3.14465
A_55_P1955268	ens|ENSMUST00000109160	ENSMUST00000109160	3.14465
A_51_P148122	ref|NM_027910|ref|NM_001163729|ens|ENSMUST00000071841|ens|ENSMUST00000165007	Klhdc3	3.14465
A_55_P2280868	gb|AK085337|tc|TC1604629|riken|D630013G20|nap|NAP086703-1	0610005C13Rik	3.1348
A_66_P105843	ref|NM_011181|ref|NM_001112701|ens|ENSMUST00000107729|ens|ENSMUST00000056820	Cyth2	3.1348
A_30_P01017887	Unknown	chr16:25122825-25273475_F	3.10559
A_30_P01018617	Unknown	chr6:86425510-86450160_R	3.10559
A_55_P2024313	gb|AK163160|riken|A730052O22	Gm4221	3.10559
A_51_P286321	ref|NM_026760|ens|ENSMUST00000047281|gb|AK009653|gb|AK003299	2310036O22Rik	3.09598
A_55_P1993858	ref|NR_001460	Rmrp	3.09598
A_51_P211786	ref|NM_027928|ens|ENSMUST00000070890|gb|AK004401|tc|TC1622946	Chst13	3.08642
A_55_P2114367	ref|NM_001177571|ens|ENSMUST00000099932|ens|ENSMUST00000159868|ens|ENSMUST00000019955	Ccdc162	3.08642
A_66_P107878	gb|AK080926|tc|TC1611955|riken|B430211I10|nap|NAP076711-1	Gm2670	3.08642
A_55_P1959313	ref|NM_133693|ens|ENSMUST00000146232|gb|AK013929|gb|AK151000	Rbm42	3.08642
A_55_P2061061	ref|NM_001204875|ref|NM_023871|ens|ENSMUST00000125824|ens|ENSMUST00000067996	Set	3.08642
A_55_P2184957	nap|NAP061708-1	NAP061708-1	3.07692
A_30_P01033609	Unknown	chr6:143053023-143069198_F	3.07692
A_30_P01019852	Unknown	chr2:151992806-152025456_R	3.07692
A_55_P2073338	ref|NM_013680|ref|NM_001110780|ens|ENSMUST00000041344|ens|ENSMUST00000081893	Syn1	3.07692
A_30_P01033003	Unknown	chr6:142915873-142938323_F	3.06748
A_55_P2037732	ref|NM_012020|ens|ENSMUST00000051312|gb|BC137811|gb|BC137812	Foxl2	3.06748
A_30_P01031399	Unknown	chrX:8898275-8909200_F	3.06748
A_51_P243153	ref|NM_146741|ens|ENSMUST00000061993|gb|BC111435|tc|TC1687830	Olfr1497	3.0581
A_55_P2215580	ref|NR_040455|gb|AK017079|tc|TC1600885|riken|4933436E23	4933436E23Rik	3.0581
A_55_P2087911	ref|NM_001166482|ens|ENSMUST00000116415|ens|ENSMUST00000149718|gb|AK141278	Mthfsd	3.0581
A_55_P1988413	ref|NM_011993|ens|ENSMUST00000121184|ens|ENSMUST00000122844|ens|ENSMUST00000154273	Dpysl4	3.0581
A_30_P01024582	Unknown	chr10:118385588-118439338_R	3.04878
A_55_P2045928	ens|ENSMUST00000069941	Butr1	3.04878
A_30_P01031175	Unknown	chr1:52706748-52712402_R	3.03951
A_30_P01019798	Unknown	chrX:12755425-12772575_R	3.03951
A_30_P01022039	Unknown	chr13:98528250-98551125_F	3.03951
A_30_P01019691	Unknown	chr12:3199327-3200827_F	3.03951
A_55_P1959384	ens|ENSMUST00000103589|gb|X06771|gb|BC147823|gb|BC147827	ENSMUST00000103589	3.03951
A_30_P01027098	Unknown	chr4:119405156-119461821_F	3.0303
A_55_P2256158	gb|AK043779|gb|AI843084|tc|TC1750421|riken|A830032D15	4930506C21Rik	3.02115
A_51_P472901	ref|NM_008577|ref|NM_001161413|ens|ENSMUST00000170157|ens|ENSMUST00000010239	Slc3a2	3.01205
A_30_P01032157	Unknown	chr16:45014806-45029475_F	3.01205
A_55_P2127809	ref|NM_146570|ens|ENSMUST00000099919|ens|ENSMUST00000099917|tc|TC1599950	Olfr1006	3.01205
A_55_P1954680	ref|NR_033532|gb|AK038776|gb|AK080797|tc|NP719858	B230206H07Rik	3.003
A_55_P2042615	ens|ENSMUST00000135268|gb|AK082716|tc|TC1594394|riken|C230094I18	ENSMUST00000135268	2.99401
A_52_P548202	gb|AK086953|tc|TC1613979|riken|E030015K02|nap|NAP124977-1	Gm10030	2.99401
A_30_P01025298	Unknown	chr17:33439305-33441112_R	2.99401
A_55_P1982414	gb|AI464814	AI464814	2.99401
A_55_P1963324	ref|NM_146494|ens|ENSMUST00000053290|gb|BC051403|tc|TC1594552	Olfr722	2.99401
A_66_P132832	ref|NM_001033208|ens|ENSMUST00000163708|ens|ENSMUST00000093823|gb|BC139077	Gcom1	2.98507
A_55_P2003941	ref|NM_001034868|ens|ENSMUST00000098433|gb|AK148121|riken|G370024M05	Mrgprx2	2.98507
A_55_P2058613	Unknown	A_55_P2058613	2.98507
A_30_P01031860	Unknown	chr17:3004525-3086000_F	2.98507
A_55_P2162807	ref|NM_012044|ens|ENSMUST00000030531|ens|ENSMUST00000105804|gb|AF166098	Pla2g2e	2.98507
A_55_P2094945	gb|BG067755|nap|NAP012247-001	BG067755	2.97619
A_51_P361580	ref|NM_008997|ens|ENSMUST00000057373|gb|AK148106|gb|AK207155	Rab11b	2.97619
A_55_P2008639	Unknown	A_55_P2008639	2.96736
A_30_P01032813	Unknown	chr1:138442536-138520766_R	2.96736
A_55_P2126528	Unknown	A_55_P2126528	2.95858
A_55_P2167743	Unknown	A_55_P2167743	2.95858
A_55_P2212968	ref|NM_001113394|ref|NM_001113393|ref|NM_001113392|ens|ENSMUST00000161559	Cd247	2.95858
A_55_P2407752	gb|CB202205	AI449212	2.94985
A_55_P1963374	ref|NM_173427|tc|TC1616259	Klhdc7a	2.94985
A_55_P2403453	ref|NR_028266|gb|AK143148|riken|E130116O09	BC037032	2.94985
A_55_P2091525	Unknown	A_55_P2091525	2.94118
A_30_P01033219	Unknown	chr7:50403100-50418175_R	2.94118
A_52_P357133	ref|NM_053267|ens|ENSMUST00000123677|ens|ENSMUST00000094469|gb|AK079576	Selm	2.94118
A_55_P2169804	ref|NM_194059|ens|ENSMUST00000070102|gb|AB095973|tc|TC1589443	Nanos3	2.94118
A_30_P01032341	Unknown	chr5:123440192-123451767_F	2.94118
A_55_P2144931	nap|NAP068489-1	NAP068489-1	2.94118
A_55_P2076159	ref|NM_207301|ens|ENSMUST00000023913|gb|AK172079|gb|AK179336	Wrb	2.93255
A_51_P198076	ref|NM_025559|ens|ENSMUST00000002655|gb|AK219905|gb|AK002959	1810046J19Rik	2.92398
A_55_P2149615	ref|NM_009750|ref|NM_001110233|ref|NM_001110234|ens|ENSMUST00000113112	Ngfrap1	2.92398
A_55_P1987290	ref|NR_004413|ref|NR_004412|ref|NR_024200|gb|M18091	Rnu1b6	2.91545
A_30_P01022892	Unknown	chrX:120819096-120820227_R	2.91545
A_30_P01032778	Unknown	chr3:35782698-35789748_F	2.90698
A_55_P2123593	ref|NM_001104627|ens|ENSMUST00000165180|ens|ENSMUST00000074107|ref|XM_003085563	Vmn2r16	2.90698
A_66_P138769	ref|NM_001168371|ref|NM_001168372|ref|NM_001168373|ref|NM_145407	Usp19	2.90698
A_51_P344376	ref|NM_013533|ens|ENSMUST00000164984|ens|ENSMUST00000046893|gb|AK171145	Gpr162	2.90698
A_30_P01033087	Unknown	chr4:101010948-101032148_R	2.90698
A_30_P01024005	Unknown	chr10:94133769-94151321_R	2.89855
A_55_P1998937	ref|NM_177635|gb|AF539596|ens|ENSMUST00000041964|tc|NP659936	H2-M11	2.89855
A_52_P354390	ref|NM_013670|ref|NM_001082962|ref|NM_001082961|ref|NM_033174	Snrpn	2.89017
A_55_P2080476	nap|NAP069007-1|nap|NAP061939-1	NAP069007-1	2.89017
A_30_P01031156	Unknown	chr5:100845342-100869667_F	2.89017
A_55_P2129578	ref|NM_001162924|ref|NM_019762|ens|ENSMUST00000160403|ens|ENSMUST00000106039	Pkp3	2.89017
A_55_P2090105	ens|ENSMUST00000134866|gb|AK147862|tc|TC1594426|riken|G270071A07	ENSMUST00000134866	2.88184
A_55_P2146050	ref|NM_177192|ens|ENSMUST00000111557|gb|AK143126|tc|TC1633280	Dennd5b	2.88184
A_55_P2142116	Unknown	A_55_P2142116	2.88184
A_55_P2129623	ref|NM_201608|ref|NM_177637|ens|ENSMUST00000073546|ens|ENSMUST00000041531	H2-M10.3	2.88184
A_55_P1979397	ref|NM_023128|ref|NM_001161747|ens|ENSMUST00000105379|ens|ENSMUST00000046945	Palm	2.87356
A_30_P01033544	Unknown	chr11:95097483-95097918_F	2.87356
A_30_P01021153	Unknown	chr4:3149375-3169700_R	2.87356
A_52_P559748	ref|NM_001097979|ref|NM_001110555|ens|ENSMUST00000110468|ens|ENSMUST00000110470	Hist1h2bq	2.87356
A_30_P01031682	Unknown	chr18:82858314-82872414_F	2.86533
A_55_P2091616	ref|NM_172946|ens|ENSMUST00000038214|gb|AK044068|gb|AK031954	Krt222	2.86533
A_55_P1988010	ref|NM_001164727|ens|ENSMUST00000096178|ens|ENSMUST00000170104|ens|ENSMUST00000166966	Gm10406	2.86533
A_55_P2084797	gb|AK046648|ens|ENSMUST00000027250|tc|TC1611241|riken|B430219L17	Aff3	2.86533
A_55_P1974273	ref|NM_029272|ens|ENSMUST00000020361|ens|ENSMUST00000105364|gb|BC013503	Ndufs7	2.86533
A_55_P2051854	nap|NAP113893-1	NAP113893-1	2.86533
A_55_P2099742	ref|NM_011888|ens|ENSMUST00000166898|ens|ENSMUST00000115914|ens|ENSMUST00000102957	Ccl19	2.85714
A_66_P127704	ens|ENSMUST00000043352|ref|XM_144292|ref|XM_914571|nap|NAP029481-1	Tmem156	2.849
A_66_P126523	ref|NM_007531|ens|ENSMUST00000129422|ens|ENSMUST00000143000|ens|ENSMUST00000100958	Phb2	2.849
A_55_P1971867	ref|NM_153143|ens|ENSMUST00000050555|gb|AK161602|gb|AK170258	Kctd11	2.84091
A_66_P122227	ref|NR_033545|gb|AK135068|riken|6430565L09	Gm10790	2.84091
A_55_P2161180	ref|NM_001199321|ref|NM_009568|ens|ENSMUST00000093395|ens|ENSMUST00000098693	Zfp94	2.84091
A_66_P113134	ref|NM_019536|ens|ENSMUST00000058440|gb|Z83812|ens|ENSMUST00000141137	Dnahc10	2.84091
A_55_P2000595	Unknown	A_55_P2000595	2.83286
A_30_P01020861	Unknown	chr6:116116949-116119051_R	2.83286
A_55_P2040583	ref|NM_198599|ens|ENSMUST00000040880|gb|AK163656|gb|BB320085	Map6d1	2.82486
A_55_P2044212	ref|NM_177787|ens|ENSMUST00000165272|ens|ENSMUST00000171804|ens|ENSMUST00000050132	Slc15a5	2.82486
A_55_P2387515	ref|XR_105147|ref|XR_107933|tc|TC1641323	9130208D14Rik	2.82486
A_30_P01026961	Unknown	chr12:81217572-81233910_F	2.82486
A_52_P240693	ref|NM_177587|ref|NM_001159658|ens|ENSMUST00000059676|gb|BC107213	Aqp12	2.8169
A_30_P01030559	Unknown	chr7:28778209-28800409_R	2.80899
A_55_P2076550	ref|NM_001093749|ens|ENSMUST00000114663|gb|EF102773|tc|TC1698478	Mpzl3	2.80899
A_30_P01021251	Unknown	chr14:77006215-77063293_R	2.80112
A_66_P134383	gb|AK082358|riken|C230040G06|nap|NAP084604-1	Gm5079	2.80112
A_30_P01031545	Unknown	chr8:131178212-131180657_F	2.80112
A_51_P484054	ref|NM_010172|ens|ENSMUST00000098925|ens|ENSMUST00000033820|gb|AK171362	F7	2.80112
A_52_P387884	ref|NM_001167923|ens|ENSMUST00000165165|ref|XM_003086751|gb|AM748258	Col6a5	2.80112
A_55_P2030005	ref|NM_146638|ens|ENSMUST00000061081|gb|BC141444|tc|NP830777	Olfr1151	2.7933
A_55_P2127139	ref|NM_178204|ref|NM_178203|ref|NM_178205|ref|NM_178207	Hist1h3d	2.7933
A_55_P1959305	ref|NM_178446|ref|NM_001127382|ref|NM_139065|ens|ENSMUST00000094757	Rbm47	2.7933
A_55_P1976376	ref|NM_174990|ref|NM_001243200|ens|ENSMUST00000090070|ens|ENSMUST00000118802	Gimap4	2.7933
A_55_P1993938	Unknown	A_55_P1993938	2.78552
A_30_P01027778	Unknown	chr15:5969454-5994540_F	2.78552
A_55_P2064965	ref|XM_003084701|ref|XM_003086603|gb|AK154763|riken|F630106A15	Gm10624	2.78552
A_55_P2109932	ref|NM_198167|ens|ENSMUST00000113523|gb|AK159673|gb|AK090200	Tmem63b	2.78552
A_30_P01025488	Unknown	chr11:22681800-22707775_F	2.78552
A_30_P01027432	Unknown	chr2:65240793-65292293_R	2.77778
A_66_P117450	ref|NM_146448|ens|ENSMUST00000060098|tc|NP830864|nap|NAP098475-001	Olfr1317	2.77008
A_55_P1966271	nap|NAP060749-1	NAP060749-1	2.77008
A_51_P421303	ref|NM_026769|ref|NM_001190386|ref|NM_001190385|ens|ENSMUST00000166758	Caly	2.77008
A_30_P01018961	Unknown	chr2:175640275-175701875_F	2.77008
A_55_P2000107	ref|NM_009720|ens|ENSMUST00000138412|ens|ENSMUST00000108857|gb|AK002432	Atox1	2.77008
A_55_P2102951	Unknown	A_55_P2102951	2.77008
A_55_P2132223	ref|NR_001582|ref|NR_027506|gb|AK005695|tc|TC1603417	Speer5-ps1	2.76243
A_30_P01025831	Unknown	chr3:22184002-22196752_R	2.76243
A_30_P01024537	Unknown	chr1:4889810-4890012_R	2.76243
A_55_P2014269	ref|NM_177362|ens|ENSMUST00000052509|gb|AK159461|gb|AK090240	Zfp771	2.76243
A_51_P468456	ref|NM_011310|ens|ENSMUST00000001047|gb|BC100690|gb|BC099893	S100a3	2.76243
A_55_P2122096	tc|TC1626042	TC1626042	2.75482
A_51_P118650	ref|NM_031392|ens|ENSMUST00000163508|ens|ENSMUST00000068700|gb|AK215735	Wdr6	2.75482
A_30_P01030012	Unknown	chr18:77805693-77811218_F	2.75482
A_55_P2179869	Unknown	A_55_P2179869	2.75482
A_55_P1971313	gb|AK156978|riken|F830111C14	Gm15847	2.75482
A_55_P2008991	ref|NM_009305|ens|ENSMUST00000116638|ens|ENSMUST00000069520|ens|ENSMUST00000033484	Syp	2.74725
A_30_P01018814	Unknown	chr19:54011403-54019143_F	2.74725
A_66_P138210	ens|ENSMUST00000149910|ref|XM_003084884|ref|XM_003085772|gb|AK131682	4930512M02Rik	2.73973
A_55_P2163904	ref|NM_001166754|ref|NM_001166845|ref|NM_001166847|ref|NM_001166736	Vmn1r157	2.73973
A_30_P01020059	Unknown	chr17:14683411-14698476_F	2.73224
A_55_P2025328	ref|NM_009314|ens|ENSMUST00000020278|gb|BC106959|gb|AK033443	Tacr2	2.73224
A_51_P262701	ref|NM_019775|ens|ENSMUST00000022576|gb|AK004045|gb|AB021968	Cpb2	2.73224
A_55_P2062039	ref|NM_001164204|ref|NM_001164205|ref|NM_024168|ens|ENSMUST00000108627	Tsen34	2.73224
A_51_P513254	ref|NM_009007|ens|ENSMUST00000080537|gb|AK193118|gb|AK076023	Rac1	2.73224
A_30_P01022309	Unknown	chr5:143196275-143207575_R	2.73224
A_30_P01032076	Unknown	chr5:44625083-44634763_F	2.7248
A_55_P2007981	ref|NM_019445|ens|ENSMUST00000085858|ens|ENSMUST00000030039|ens|ENSMUST00000165284	Fmn2	2.7248
A_55_P2093286	ref|NM_007470|ens|ENSMUST00000130560|ens|ENSMUST00000115230|gb|AK157917	Apod	2.71739
A_55_P2108109	ref|NM_010205|ref|NM_001166361|ref|NM_001166362|ref|NM_001166363	Fgf8	2.71739
A_30_P01020603	Unknown	chr18:54115625-54123729_F	2.71739
A_51_P197259	ref|NM_007638|ens|ENSMUST00000032078|gb|AK202338|gb|AK198159	Cct7	2.71003
A_55_P1966377	ref|NM_029142|ens|ENSMUST00000069209|gb|BC115663|gb|BC115664	4930502E18Rik	2.71003
A_55_P2008349	ref|NM_025596|ens|ENSMUST00000021942|ref|XM_001476721|gb|AK146857	Prelid1	2.71003
A_30_P01030468	Unknown	chr12:17350856-17355179_R	2.71003
A_30_P01031588	Unknown	chr1:134167181-134181457_R	2.71003
A_55_P2007966	ref|NM_177175|ref|NM_001166009|gb|AK044217|gb|AK044627	Tmem215	2.71003
A_51_P484671	ref|NM_138305|ref|NM_001159537|ref|NM_001159536|ens|ENSMUST00000127756	Adcy3	2.71003
A_55_P2100290	ref|NM_007416|ens|ENSMUST00000067258|ens|ENSMUST00000124306|ens|ENSMUST00000167574	Adra1b	2.7027
A_55_P2007673	ref|NM_199302|ens|ENSMUST00000028132|ens|ENSMUST00000113200|gb|BC049146	Lrsam1	2.7027
A_55_P2019457	ref|NM_013509|ens|ENSMUST00000125436|ens|ENSMUST00000004378|ens|ENSMUST00000147307	Eno2	2.7027
A_55_P1952162	Unknown	A_55_P1952162	2.7027
A_55_P2046867	ref|NM_008093|ens|ENSMUST00000015771|gb|U84725|tc|TC1589643	Gata5	2.7027
A_55_P2041137	ens|ENSMUST00000161581	ENSMUST00000161581	2.7027
A_55_P2093774	ref|NM_007697|ens|ENSMUST00000032163|ens|ENSMUST00000089225|ens|ENSMUST00000066905	Chl1	2.69542
A_30_P01028819	Unknown	chr4:146345650-146356650_F	2.69542
A_55_P2234964	gb|AI987986	AI987986	2.68817
A_55_P2270437	gb|AK029922|tc|TC1718586|riken|4931441A13|nap|NAP124538-1	4930528J11Rik	2.68097
A_51_P174016	ref|NM_008202|ref|NM_001077709|ens|ENSMUST00000170491|ens|ENSMUST00000025186	Slc39a7	2.68097
A_30_P01029443	Unknown	chr15:58985008-58985429_F	2.6738
A_55_P2205448	gb|AK037477|riken|A130020N20|nap|NAP079538-1	C330026H20Rik	2.6738
A_51_P431543	ref|NM_027084|ens|ENSMUST00000132440|ens|ENSMUST00000044533|gb|JF698684	Prss56	2.6738
A_30_P01025765	Unknown	chr4:44240894-44241570_R	2.6738
A_51_P126177	ref|NM_026160|ens|ENSMUST00000034270|gb|AK003106|gb|AK172322	Map1lc3b	2.66667
A_66_P125560	ref|NM_207000|ens|ENSMUST00000020283|ens|ENSMUST00000169265|gb|AK032636	H2afy2	2.66667
A_30_P01031447	Unknown	chr5:120253747-120281800_R	2.65957
A_66_P120901	ref|NM_016843|ens|ENSMUST00000016685|ens|ENSMUST00000163242|gb|X61506	Atxn10	2.65957
A_55_P2087352	ens|ENSMUST00000044043	ENSMUST00000044043	2.65957
A_55_P2074647	ref|NM_144521|ens|ENSMUST00000010038|gb|AK028053|gb|AK081883	Snap47	2.65957
A_55_P2016049	ref|NM_001163014|ens|ENSMUST00000108590|gb|AK079424|tc|TC1624504	Gp6	2.65957
A_55_P1976224	ref|NM_021273|ens|ENSMUST00000001304|gb|BC106109|gb|BC015271	Ckb	2.65252
A_30_P01020789	Unknown	chr7:16584852-16657252_F	2.65252
A_55_P2014352	Unknown	A_55_P2014352	2.65252
A_30_P01019887	Unknown	chr8:12535648-12544923_R	2.65252
A_30_P01032614	Unknown	chr8:34646787-34680312_R	2.63852
A_55_P2108389	ref|NM_177135|ens|ENSMUST00000169555|gb|AK085928|ens|ENSMUST00000112816	D830030K20Rik	2.63852
A_55_P2028500	gb|AY512922|tc|TC1593677|nap|NAP054893-1|nap|NAP125254-1	Gm10165	2.63852
A_55_P2052495	ref|NM_025868|ens|ENSMUST00000111665|ens|ENSMUST00000053664|ens|ENSMUST00000111664	Tmx2	2.63852
A_55_P2135931	Unknown	A_55_P2135931	2.63852
A_51_P281700	ref|NM_010613|ens|ENSMUST00000065744|ens|ENSMUST00000007814|gb|AK077415	Khsrp	2.63158
A_55_P2072656	ref|NM_009897|ens|ENSMUST00000000317|ens|ENSMUST00000078222|ens|ENSMUST00000153040	Ckmt1	2.63158
A_30_P01028495	Unknown	chr14:105988692-105994145_F	2.63158
A_55_P2148684	ref|NM_011913|ens|ENSMUST00000117346|gb|BC139060|gb|BC139061	Best1	2.62467
A_55_P2118856	ens|ENSMUST00000072455|gb|AK015192|tc|TC1733120|riken|4930423O20	ENSMUST00000072455	2.62467
A_55_P2397614	gb|AI842900	AI842900	2.62467
A_66_P110798	gb|AK145507|gb|BC042411|tc|TC1616894|tc|TC1575601	AK145507	2.62467
A_30_P01022623	Unknown	chr11:120094176-120097622_R	2.6178
A_30_P01021922	Unknown	chr3:62727150-62758225_R	2.6178
A_55_P2117731	ref|NM_027470|ens|ENSMUST00000108283|ens|ENSMUST00000032823|gb|AK088512	Pak4	2.6178
A_51_P329003	ref|NM_178386|ens|ENSMUST00000091184|gb|AK006599|gb|BC139243	Slc25a31	2.6178
A_55_P2314316	gb|CA491940	0610008F07Rik	2.6178
A_30_P01029673	Unknown	chr11:69188111-69188571_R	2.61097
A_55_P1960097	ref|NM_013813|ens|ENSMUST00000024843|ens|ENSMUST00000112680|ens|ENSMUST00000080208	Epb4.1l3	2.61097
A_30_P01025379	Unknown	chr13:94182877-94203935_F	2.61097
A_55_P1983848	ref|NM_028924|ref|NM_001082976|ens|ENSMUST00000110047|gb|AK016683	Tc2n	2.61097
A_55_P2100197	ens|ENSMUST00000090166|ref|XM_003086329|gb|AK142824|gb|BB525011	ENSMUST00000090166	2.61097
A_55_P2050169	ref|NM_134244|ens|ENSMUST00000091734|tc|NP1398887|nap|NAP029150-1	Vmn1r197	2.60417
A_30_P01029805	Unknown	chr1:182686731-182709331_R	2.60417
A_30_P01030957	Unknown	chr11:102878974-102888924_R	2.60417
A_55_P1988260	tc|TC1630414	TC1630414	2.60417
A_51_P276802	ref|NM_054080|ens|ENSMUST00000078239|gb|AK012162|tc|TC1591493	Akr1c20	2.60417
A_55_P2169029	ref|NM_207235|ens|ENSMUST00000100146|gb|BC119215|gb|BC119217	Olfr358	2.5974
A_30_P01032937	Unknown	chr1:74084292-74138492_F	2.5974
A_30_P01022840	Unknown	chr9:113676535-113677163_F	2.5974
A_30_P01017627	Unknown	chr17:26679595-26688270_R	2.59067
A_55_P2102991	ref|XR_105971|gb|AK035331|tc|TC1615325|riken|9530018H19	Gm4311	2.59067
A_30_P01023888	Unknown	chr17:39960567-39992817_F	2.58398
A_55_P2261572	ref|NM_009619|ens|ENSMUST00000171438|ens|ENSMUST00000170318|ens|ENSMUST00000033958	Adam3	2.58398
A_51_P376711	ens|ENSMUST00000126693|gb|BC028660|tc|TC1591914	ENSMUST00000126693	2.58398
A_55_P2065661	ref|NM_020262|gb|AF167316|tc|TC1589758|nap|NAP000119-005	Zfp109	2.58398
A_51_P416869	ref|NM_008683|ens|ENSMUST00000163750|ens|ENSMUST00000010520|gb|D10918	Nedd8	2.58398
A_55_P2020894	ref|NM_178609|ens|ENSMUST00000173471|ens|ENSMUST00000073781|gb|AK045040	E2f7	2.58398
A_51_P266248	gb|AK134885|gb|BC037128|tc|TC1650351|tc|TC1605289	Ighv14-2	2.57732
A_30_P01025862	Unknown	chr3:137736327-137752677_F	2.57732
A_30_P01032077	Unknown	chr14:14660983-14746992_R	2.57732
A_55_P2097340	ref|NM_145621|ens|ENSMUST00000035700|gb|BC017634|gb|AK085143	Camkv	2.57732
A_30_P01033163	Unknown	chr7:71231097-71233680_R	2.57732
A_55_P2000628	gb|BC025048	Dusp7	2.57732
A_55_P2159715	ref|XM_892685|ref|XM_003086587	Gm6818	2.57732
A_55_P2007381	ens|ENSMUST00000032872|gb|AK005840|tc|TC1713706|riken|1700010L04	ENSMUST00000032872	2.57069
A_30_P01024572	Unknown	chr11:49932129-49938154_R	2.57069
A_52_P423247	ref|NM_019840|ref|NM_001177980|ref|NM_001177981|ref|NM_001177982	Pde4b	2.57069
A_51_P301621	gb|AK018435|ens|ENSMUST00000122014|tc|TC1746547|riken|8430422M09	2610015P09Rik	2.57069
A_55_P2101137	ref|NM_146350|ens|ENSMUST00000054974	Olfr1123	2.5641
A_55_P2221484	ref|NR_045715|ref|NR_045716|gb|AK165234|tc|TC1706431	F420014N23Rik	2.5641
A_30_P01025180	Unknown	chr18:83530624-83534486_R	2.5641
A_30_P01033590	Unknown	TSIX	2.5641
A_55_P1983284	ref|NM_008028|ref|NM_001040403|ens|ENSMUST00000100784|ens|ENSMUST00000100786	Flot2	2.5641
A_52_P112463	ref|NR_015388|ens|ENSMUST00000159568|gb|AK044034|gb|AK032537	Dlx6as1	2.5641
A_52_P593212	ens|ENSMUST00000155922|ens|ENSMUST00000114435|ref|XM_003084645|ref|XM_003086518	ENSMUST00000155922	2.5641
A_51_P444502	ens|ENSMUST00000103369|ens|ENSMUST00000103367|gb|U55589|gb|U37912	ENSMUST00000103369	2.5641
A_55_P2029687	ref|NM_010442|ens|ENSMUST00000098626|ens|ENSMUST00000005548|gb|AK159870	Hmox1	2.55754
A_55_P2128794	ref|NM_001080385|ref|NM_016760|ref|NM_001080384|ref|NM_001080386	Clta	2.55754
A_52_P573467	ref|NM_008644|ens|ENSMUST00000078656|ens|ENSMUST00000170832|gb|U37531	Prol1	2.55754
A_55_P1967010	ref|NM_012014|ens|ENSMUST00000099506|ens|ENSMUST00000135343|gb|AK144210	Gprin1	2.55754
A_55_P2003297	ref|NM_020015|ref|NM_020016|ens|ENSMUST00000112559|ens|ENSMUST00000069477	Magea1	2.55102
A_30_P01020418	Unknown	chr3:3030146-3033623_F	2.55102
A_51_P114772	ref|NM_170588|ref|NM_170590|ens|ENSMUST00000147627|ens|ENSMUST00000109607	Cpne1	2.55102
A_66_P109595	ref|NM_022022|ens|ENSMUST00000167743|ens|ENSMUST00000103212|gb|AK122345	Ube4b	2.55102
A_30_P01023123	Unknown	chr14:78957377-78962977_F	2.54453
A_55_P2016064	Unknown	A_55_P2016064	2.53807
A_55_P1990319	ref|NM_025516|ens|ENSMUST00000149381|ens|ENSMUST00000006035|ens|ENSMUST00000137545	Ergic3	2.53807
A_51_P344346	ref|NM_001081665|ens|ENSMUST00000044729|ens|ENSMUST00000169699|gb|BC116335	Ccdc129	2.53807
A_30_P01019912	Unknown	chr17:39960567-39992817_R	2.53807
A_66_P123357	ref|NM_001033412|gb|AK147771|tc|TC1592874|riken|G270031F15	Gm829	2.53807
A_30_P01030984	Unknown	chr9:14460976-14488051_R	2.53165
A_55_P2398089	gb|AK045073|gb|BE949301|riken|B130024M06|nap|NAP124764-1	B130024M06Rik	2.52525
A_30_P01025518	Unknown	chr16:31321192-31333486_R	2.52525
A_55_P2152946	ens|ENSMUST00000082356|gb|AK042381|tc|TC1593448|riken|A630086M08	Scaf8	2.52525
A_55_P2106778	Unknown	A_55_P2106778	2.52525
A_30_P01032775	Unknown	chrX:92149320-92151107_R	2.52525
A_55_P2040490	Unknown	A_55_P2040490	2.51889
A_55_P2090500	Unknown	A_55_P2090500	2.51889
A_55_P2075627	ref|NM_011789|ens|ENSMUST00000020349|ens|ENSMUST00000105359|tc|TC1608415	Apc2	2.51889
A_55_P2240161	ref|NR_040279|gb|AK139229|riken|A730075M18	A730090H04Rik	2.51889
A_55_P2064976	ref|NR_028384|gb|AK014838|gb|AK015922|gb|BC031206	4930528A17Rik	2.51889
A_51_P220625	gb|AK019641|gb|BY715075|tc|TC1693803|riken|4930469B13	4930469B13Rik	2.51889
A_51_P469951	ref|NM_080448|ens|ENSMUST00000133702|ens|ENSMUST00000088373|gb|AK122276	Srgap3	2.51889
A_66_P139618	ref|NM_001082545|gb|M92418|nap|NAP098315-001	Stfa2	2.51889
A_55_P2013223	ref|NM_001081159|ens|ENSMUST00000022186|gb|BC147382|gb|BC147383	S100z	2.51256
A_55_P2013414	ref|NM_010058|ens|ENSMUST00000170564|ens|ENSMUST00000108478|ens|ENSMUST00000146429	Dmwd	2.50627
A_55_P2052181	ref|NM_025534|ens|ENSMUST00000046743|ens|ENSMUST00000139567|ens|ENSMUST00000004473	Ccdc82	2.50627
A_66_P110606	ens|ENSMUST00000015981|gb|AK028898|tc|TC1582754|riken|4732468D23	Sqstm1	2.5

## Sheet: Table S3
Table S3. Genes down-regulated ≥2.5 fold in the cerebellum of female pups from mothers having FA supplementation during gestation at 20 mg/kg in comparison to mothers at2 mg/kg diet.
UniqueID	Accession	Symbol	Fold Change
A_55_P2144401	gb|AK076447|tc|TC1610828|riken|4833401C05|nap|NAP089021-1	Gm4319	-816.891
A_51_P281582	ref|NM_029985|ens|ENSMUST00000137837|ens|ENSMUST00000030360|gb|AK020847	Lrrc42	-732.66
A_55_P2100241	ref|NR_003278|gb|BC042411|gb|AK145507|tc|TC1684486	Rn18s	-170.19
A_30_P01023727	Unknown	chr9:100977450-100989325_F	-103.465
A_30_P01032942	Unknown	chr4:94742359-94822969_F	-80.56
A_55_P2106569	ens|ENSMUST00000102968|tc|TC1692242	ENSMUST00000102968	-72.605
A_30_P01025310	Unknown	chr2:108456668-108532418_R	-47.571
A_55_P2355676	gb|AK017005|tc|TC1731788|riken|4933431I19|nap|NAP073583-1	4933431I19Rik	-47.275
A_55_P2178466	ref|NM_025466|ens|ENSMUST00000163632|ens|ENSMUST00000032129|gb|AK008622	Gkn1	-45.255
A_30_P01018115	Unknown	chr18:36449530-36456800_R	-44.447
A_30_P01018188	Unknown	chr11:87841800-87858725_F	-23.802
A_55_P2039196	ref|NM_020014|ref|NM_001136063|ens|ENSMUST00000110234|ens|ENSMUST00000066958	Gfra4	-23.361
A_55_P1987290	ref|NR_004413|ref|NR_004412|ref|NR_024200|gb|M18091	Rnu1b6	-23.28
A_55_P2121618	ref|NM_023434|ens|ENSMUST00000022766|gb|AK147023|gb|AK137050	Tox4	-22.896
A_55_P1954897	Unknown	A_55_P1954897	-22.88
A_30_P01022343	Unknown	chr7:86651948-86675223_F	-22.378
A_30_P01023832	Unknown	chr18:36470130-36489110_R	-22.131
A_30_P01024724	Unknown	chr13:73472571-73483846_R	-20.337
A_52_P420466	ref|NM_175660|ens|ENSMUST00000078369|gb|AI787920|tc|TC1594441	Hist1h2ab	-19.08
A_30_P01026605	Unknown	chr16:39984031-40081556_R	-18.328
A_55_P1956443	ref|NM_001080949|ens|ENSMUST00000006451|gb|AK157777|gb|AK161279	Ttc5	-18.038
A_30_P01024297	Unknown	chr6:121035216-121035648_R	-18.001
A_55_P2132147	ens|ENSMUST00000082411|gb|AK139029|gb|BU555928|tc|TC1694307	ND3	-17.926
A_55_P1982329	Unknown	A_55_P1982329	-17.28
A_30_P01026859	Unknown	chr1:82892851-82943201_R	-17.148
A_52_P28651	ref|NM_021424|ens|ENSMUST00000034510|gb|AK147479|gb|BC060694	Pvrl1	-16.807
A_55_P2161829	ref|NR_033589|gb|L38477|gb|U00431|gb|DV069204	Hmgb1-rs17	-16.564
A_55_P2072458	gb|AK029367|tc|TC1610737|riken|4833406H12|nap|NAP025216-001	Atp13a4	-15.978
A_55_P2181326	ref|XM_001474011	LOC100045292	-15.867
A_55_P2175550	ref|NM_001025093|ref|NM_009715|ens|ENSMUST00000112017|ens|ENSMUST00000112005	Atf2	-15.595
A_30_P01029505	Unknown	chr9:27148989-27155714_F	-15.253
A_51_P225525	ref|NR_004052|ens|ENSMUST00000140299|gb|AK043098|gb|BC038498	Gm9079	-15.064
A_55_P2125823	Unknown	A_55_P2125823	-15.053
A_30_P01024801	Unknown	chr5:52998788-53010250_R	-15.001
A_55_P2048867	gb|EU616813|gb|EU616812	EU616813	-14.991
A_30_P01030751	Unknown	chr7:71093563-71095094_F	-14.672
A_30_P01022751	Unknown	chr11:97275905-97310538_F	-14.652
A_55_P2041086	ref|NM_001114102|tc|TC1662746	1110034B05Rik	-14.52
A_51_P469789	ref|NM_016702|ens|ENSMUST00000027491|gb|AF027730|gb|AK149432	Agxt	-14.4
A_55_P1988703	ref|NM_146896|ens|ENSMUST00000076438|nap|NAP006888-002	Olfr1205	-14.192
A_55_P2005050	tc|TC1602431|nap|NAP092777-001|nap|NAP111358-1|nap|NAP114875-1	TC1602431	-13.948
A_55_P2008896	nap|NAP114945-1	NAP114945-1	-13.671
A_55_P1998169	ref|NM_177123|ens|ENSMUST00000041840|gb|BC132098|gb|AK048961	Spef2	-13.604
A_30_P01020620	Unknown	chr13:98635795-98646617_R	-13.501
A_52_P628915	ref|NM_009308|ens|ENSMUST00000025110|ens|ENSMUST00000165336|gb|AK043985	Syt4	-13.399
A_55_P2096867	ref|NM_008083|ens|ENSMUST00000125187|ens|ENSMUST00000102817|gb|BC080758	Gap43	-13.38
A_51_P116813	ref|NM_007809|ens|ENSMUST00000131142|ens|ENSMUST00000026012|gb|M64863	Cyp17a1	-13.223
A_55_P2098140	ref|NM_019770|ens|ENSMUST00000076160|ens|ENSMUST00000060226|ref|XR_105246	Tmed2	-13.177
A_55_P2086525	Unknown	A_55_P2086525	-13.096
A_30_P01025536	Unknown	chr11:97505439-97522274_F	-13.096
A_51_P136508	ref|NM_009732|ens|ENSMUST00000046001|gb|AK138179|gb|BC051997	Avp	-13.068
A_55_P2004201	nap|NAP000004-004	NAP000004-004	-13.041
A_30_P01032963	Unknown	chr12:110845020-110850870_R	-13.005
A_55_P1961414	Unknown	A_55_P1961414	-12.96
A_30_P01020374	Unknown	chr8:111766396-111772271_F	-12.808
A_51_P353008	ref|NM_010799|ens|ENSMUST00000025827|gb|AK151486|gb|AK128911	Minpp1	-12.79
A_30_P01018294	Unknown	chr3:127170996-127201096_F	-12.764
A_55_P2177910	ref|NM_010704|ens|ENSMUST00000156402|ens|ENSMUST00000102777|gb|U49110	Lepr	-12.685
A_55_P1999197	ref|NM_001081276|ref|NM_177548|ref|NM_029709|ens|ENSMUST00000070989	Clasp1	-12.614
A_55_P2104472	nap|NAP028575-1	NAP028575-1	-12.562
A_30_P01032901	Unknown	chr9:14480441-14483362_F	-12.475
A_55_P2166685	ens|ENSMUST00000149819|gb|AK187901|gb|AK184771|gb|AK189005	Fxc1	-12.432
A_30_P01022017	Unknown	chr6:90745692-90777977_R	-11.917
A_55_P1971574	ref|NM_030721|ens|ENSMUST00000114237|ens|ENSMUST00000154796|ens|ENSMUST00000114235	Acox3	-11.893
A_52_P460929	ref|NM_001001185|ens|ENSMUST00000078471|gb|BC048507|gb|AK133011	BC048507	-11.77
A_55_P1989248	Unknown	A_55_P1989248	-11.68
A_52_P579252	nap|NAP063041-1|nap|NAP071183-1	NAP063041-1	-11.632
A_55_P2072315	gb|AK133410|riken|4933416E08	Gm10216	-11.584
A_30_P01023755	Unknown	chr17:22815742-22828592_R	-11.551
A_52_P467140	ref|NM_019776|ens|ENSMUST00000001460|gb|AK161591|gb|AK159837	Snd1	-11.551
A_55_P2060938	nap|NAP061055-1	NAP061055-1	-11.511
A_55_P1992099	ref|NM_008982|ens|ENSMUST00000026352|ens|ENSMUST00000169760|ens|ENSMUST00000168621	Ptprj	-11.48
A_30_P01025453	Unknown	chr12:13109460-13122709_F	-11.472
A_51_P405089	ens|ENSMUST00000022099|ens|ENSMUST00000123766|gb|AK081865|gb|AK137404	Lpcat1	-11.385
A_30_P01020298	Unknown	chr15:78404840-78412046_R	-11.377
A_55_P1999408	ens|ENSMUST00000030443|ens|ENSMUST00000144620|ens|ENSMUST00000123226|gb|BC058397	Ptch2	-11.267
A_66_P125161	ref|NR_040774|ens|ENSMUST00000143859|gb|AK132134|riken|3110093C09	1700057H15Rik	-11.197
A_51_P229893	ref|NM_021445|ens|ENSMUST00000021890|gb|AF223401|gb|AK005518	Cts6	-11.142
A_55_P1960703	nap|NAP096028-001	NAP096028-001	-11.004
A_55_P2386677	Unknown	A_55_P2386677	-10.997
A_55_P2064969	nap|NAP018461-001	NAP018461-001	-10.989
A_55_P2093770	Unknown	A_55_P2093770	-10.966
A_55_P1982533	ref|NM_148941|ref|NM_001145974|ens|ENSMUST00000034796|gb|BC037030	Elovl4	-10.906
A_51_P508115	ref|NM_001164659|ens|ENSMUST00000078626|gb|BC086653|gb|AK129119	Trank1	-10.875
A_55_P2164998	ens|ENSMUST00000165299|ref|XM_908296|nap|NAP026548-1	LOC546711	-10.845
A_55_P2067221	ens|ENSMUST00000051049|ens|ENSMUST00000129815|gb|AK147351|tc|TC1678812	Iqsec3	-10.785
A_51_P257550	ref|NM_010807|ens|ENSMUST00000062356|gb|BC006757|gb|X61399	Marcksl1	-10.778
A_30_P01026230	Unknown	chr2:31714946-31716972_F	-10.77
A_51_P195483	ref|NM_180600|ens|ENSMUST00000059555|gb|AK150776|gb|AK083216	Ube2q2	-10.755
A_52_P311031	gb|AK016943|tc|TC1593688|riken|4933427C01|nap|NAP121004-001	Gm9757	-10.741
A_55_P2071846	Unknown	A_55_P2071846	-10.666
A_55_P1981105	ref|NM_001243043|ref|NM_001243044|ref|NM_007454|ens|ENSMUST00000063477	Ap1b1	-10.637
A_55_P1968304	Unknown	A_55_P1968304	-10.607
A_30_P01029934	Unknown	chr11:95627874-95640824_R	-10.461
A_55_P2007243	ref|NM_008421|ens|ENSMUST00000025202|gb|AK082119|gb|AK147476	Kcnc1	-10.411
A_55_P1988907	ref|NM_001114361|ref|NM_001114362|ref|NM_199466|ens|ENSMUST00000096766	Eml4	-10.375
A_30_P01033668	Unknown	chr11:49933305-49934805_F	-10.26
A_55_P2268945	gb|AK081449|riken|C130018J17|nap|NAP122333-001	Gm17244	-10.218
A_30_P01024456	Unknown	chr4:90877414-90917198_F	-10.189
A_51_P328300	ref|NM_009787|ens|ENSMUST00000077290|gb|BC141078|gb|Y00884	Pdia4	-10.098
A_55_P1984413	ref|XM_003085058|ref|XM_003085956|gb|AK040251|tc|TC1591739	Gm9948	-10.077
A_55_P2095266	ens|ENSMUST00000062591|nap|NAP113774-1	ENSMUST00000062591	-9.959
A_55_P1960936	Unknown	A_55_P1960936	-9.89
A_30_P01020476	Unknown	chrX:18744367-18853992_F	-9.877
A_55_P2151209	ref|NM_130873|ens|ENSMUST00000051103|gb|AF345294|gb|BC116200	Krtap16-4	-9.836
A_55_P2007496	gb|BB237529	BB237529	-9.768
A_51_P172688	ref|NM_024270|ens|ENSMUST00000039694|gb|AK152378|gb|AK002760	Stard3nl	-9.768
A_55_P2235958	ens|ENSMUST00000079186|tc|TC1638179	ENSMUST00000079186	-9.768
A_55_P2258366	gb|AK081218|tc|TC1595901|riken|C030009H01|nap|NAP089809-1	C030009H01Rik	-9.734
A_30_P01027466	Unknown	chr4:35106125-35127700_R	-9.734
A_55_P2092252	ref|NM_001142965|ens|ENSMUST00000128276|gb|AK038461|gb|BC132345	6430704M03Rik	-9.667
A_55_P2065513	ref|NM_007897|ens|ENSMUST00000101326|ens|ENSMUST00000109268|gb|AK139021	Ebf1	-9.573
A_30_P01019269	Unknown	chr12:112224193-112225328_R	-9.547
A_55_P2029446	ref|NM_001255991|ens|ENSMUST00000094541|gb|XM_003085438	Btbd8	-9.435
A_51_P237688	ref|NM_133697|ens|ENSMUST00000135258|gb|AK088833|gb|AK003345	1110003E01Rik	-9.37
A_52_P234910	ref|XM_001472223|ref|XM_003086859|nap|NAP061240-1	Gm15032	-9.35
A_30_P01026445	Unknown	chr11:19778600-19815950_F	-9.324
A_51_P485240	ref|NM_028320|gb|AK208698|gb|AK168069|gb|AK167896	Adipor1	-9.324
A_52_P553316	ref|NM_133741|ref|NM_001164572|ens|ENSMUST00000118886|ens|ENSMUST00000120173	Snrk	-9.266
A_55_P1988754	ref|NM_175652|ens|ENSMUST00000090778|gb|BC152885|gb|AK045187	Hist4h4	-9.221
A_55_P2055137	Unknown	A_55_P2055137	-9.209
A_51_P208769	ref|NM_133719|ens|ENSMUST00000002344|ens|ENSMUST00000165838|gb|BC132177	Metrn	-9.177
A_30_P01018760	Unknown	chr15:79764481-79809909_R	-9.101
A_55_P1970631	ref|NM_139061|ens|ENSMUST00000109578|ens|ENSMUST00000094375|ens|ENSMUST00000006221	Vps54	-9.095
A_55_P2108754	ref|NM_138589|ens|ENSMUST00000033158|gb|AK078990|tc|TC1581111	Ubfd1	-9.082
A_52_P544555	ref|NM_024219|ens|ENSMUST00000034300|gb|AK010939|gb|AK018708	Hsbp1	-9.076
A_55_P2034097	ref|NM_010485|ens|ENSMUST00000098950|gb|AK034536|gb|AK080365	Elavl1	-9.069
A_52_P381929	ref|NM_018798|ens|ENSMUST00000060714|gb|AK076159|gb|BC053022	Ubqln2	-9.044
A_30_P01032612	Unknown	chr2:60531602-60543635_R	-8.982
A_51_P388973	ref|NM_001042438|ref|NM_009572|ens|ENSMUST00000110168|ens|ENSMUST00000070143	Zhx1	-8.976
A_55_P1955821	ref|NM_001193666|ref|NM_001193668|ref|NM_011335|ref|NM_023052	Gm13304	-8.963
A_55_P2006852	ref|NM_178681|ens|ENSMUST00000170871|ens|ENSMUST00000072865|ens|ENSMUST00000040500	Dgkb	-8.932
A_55_P2183672	ref|NM_018858|ens|ENSMUST00000036951|gb|AK149815|gb|AK143897	Pebp1	-8.901
A_30_P01022956	Unknown	chr13:70745306-70837331_R	-8.87
A_30_P01032124	Unknown	chr7:66562376-66579519_R	-8.864
A_55_P2148744	Unknown	A_55_P2148744	-8.852
A_66_P105074	ref|NM_032003|ref|NM_001168620|ens|ENSMUST00000024756|ens|ENSMUST00000126032	Enpp5	-8.84
A_55_P1954092	ref|XM_003085330|gb|BB713741	Gm19809	-8.809
A_55_P2142393	ref|NM_007578|ref|NM_001252061|ref|NM_001252059|ref|NM_001252060	Cacna1a	-8.797
A_55_P2051322	ref|NM_025994|ens|ENSMUST00000036854|gb|AK150207|gb|AK007560	Efhd2	-8.785
A_55_P1964682	ref|NR_003279	Rna28s1	-8.773
A_55_P2024933	ref|NM_026521|ens|ENSMUST00000078976|gb|AK167791|gb|AK168303	Zfp706	-8.742
A_55_P2035981	ref|NM_199475|ref|NM_133858|ens|ENSMUST00000133762|ens|ENSMUST00000168223	Fam63a	-8.724
A_51_P520384	ref|NM_007502|ens|ENSMUST00000034983|gb|AK218384|gb|AK218295	Atp1b3	-8.682
A_55_P2350022	ref|NM_198111|ens|ENSMUST00000065911|ens|ENSMUST00000110722|ens|ENSMUST00000095737	Akap6	-8.67
A_30_P01031833	Unknown	chr10:5950116-5958250_F	-8.646
A_52_P283910	ref|NM_016690|ens|ENSMUST00000031271|ens|ENSMUST00000135424|gb|AK011143	Hnrpdl	-8.616
A_55_P2025655	gb|CB248850|tc|TC1629243	CB248850	-8.61
A_55_P2079732	ref|NM_001164573|ens|ENSMUST00000169347|ens|ENSMUST00000172328|ens|ENSMUST00000152694	Myo1h	-8.598
A_55_P2170834	ens|ENSMUST00000151373|gb|CA461216|tc|TC1717286	Myo18a	-8.574
A_66_P126348	ref|NR_033217|ens|ENSMUST00000098713|gb|AK018670|gb|AK136454	BC030870	-8.574
A_55_P2084128	ref|NM_198957|ens|ENSMUST00000095143|ens|ENSMUST00000063839|gb|BC137620	C430048L16Rik	-8.556
A_55_P2408848	ref|NM_172671|ens|ENSMUST00000046548|ens|ENSMUST00000111037|gb|AK033699	Lgr4	-8.55
A_55_P2022569	ref|NM_001195049|ref|NM_001195048|ref|NM_001195046|ref|NM_008778	Pak3	-8.533
A_55_P2123529	nap|NAP114419-1	NAP114419-1	-8.497
A_30_P01032655	Unknown	chr16:13752215-13764390_R	-8.491
A_55_P2097543	ref|NM_001011773|ens|ENSMUST00000075390|nap|NAP108586-1|nap|NAP100243-001	Olfr1287	-8.486
A_66_P111322	ref|NM_001004182|ens|ENSMUST00000061740|gb|AK084030|tc|TC1709763	Gm5567	-8.444
A_66_P125257	ref|NM_178686|ens|ENSMUST00000049811|gb|AK089236|gb|AK089242	Cep120	-8.421
A_30_P01022666	Unknown	chr14:105987405-106063477_F	-8.415
A_55_P1983739	Unknown	A_55_P1983739	-8.404
A_55_P2045066	ref|NM_001166589|ref|NM_001166590|ref|NM_001166591|ref|NM_001166592	Eif5a	-8.328
A_51_P319879	ref|NM_007382|ens|ENSMUST00000072697|gb|AK146444|gb|U07159	Acadm	-8.328
A_55_P2015173	nap|NAP115224-1	NAP115224-1	-8.299
A_55_P2166572	ref|NM_009261|ens|ENSMUST00000028279|ens|ENSMUST00000072186|gb|BC014710	Strbp	-8.288
A_55_P2260052	gb|AK131895|riken|2210413J24	Gm17753	-8.259
A_55_P2018307	Unknown	A_55_P2018307	-8.248
A_52_P314129	ref|NM_008862|ens|ENSMUST00000028999|gb|AK031123|gb|AK010212	Pkia	-8.219
A_51_P298837	ref|NM_009262|ref|NM_001166466|ref|NM_001166463|ens|ENSMUST00000070209	Spock1	-8.208
A_51_P256384	ref|NM_009723|ref|NM_001036684|ens|ENSMUST00000101044|ens|ENSMUST00000101045	Atp2b2	-8.202
A_55_P2037111	ref|NM_009391|ens|ENSMUST00000111343|ens|ENSMUST00000031383|gb|AK151341	Ran	-8.196
A_55_P2036629	Unknown	A_55_P2036629	-8.168
A_52_P539414	ref|NM_181410|ens|ENSMUST00000142746|ens|ENSMUST00000031333|gb|AK017176	Gtf2h3	-8.145
A_51_P180001	ref|NM_153178|ens|ENSMUST00000044113|gb|BC096465|gb|AK220193	Eif2c2	-8.095
A_51_P116665	ens|ENSMUST00000136929|ref|XM_003086685|gb|AK012880|tc|TC1627899	ENSMUST00000136929	-8.078
A_55_P2056192	nap|NAP111293-1	NAP111293-1	-8.056
A_55_P2009677	ref|NM_183208|ens|ENSMUST00000007961|ens|ENSMUST00000162645|gb|BC058646	Zmiz1	-8.017
A_52_P307961	ref|NM_147219|ens|ENSMUST00000043961|gb|AK143029|gb|AK129463	Abca5	-8
A_55_P2029111	gb|AK040829|riken|A530028G21|nap|NAP124674-1	AK040829	-7.989
A_52_P521507	ref|NM_001081302|ens|ENSMUST00000090247|gb|BC035955|gb|BC051169	Trio	-7.983
A_30_P01019472	Unknown	chr9:65376063-65390480_R	-7.967
A_52_P235861	ref|NM_008817|gb|AK083432|riken|D030010D15|nap|NAP107611-1	Peg3	-7.956
A_55_P2056342	ref|NM_025569|ens|ENSMUST00000028005|gb|AK003309|gb|AK135742	Mgst3	-7.956
A_51_P161037	ref|NM_001099637|ens|ENSMUST00000057037|gb|AK172953|gb|BC038377	Cep170	-7.95
A_30_P01021929	Unknown	chr9:118291593-118324230_F	-7.939
A_66_P124670	ref|NM_178259|ens|ENSMUST00000109684|gb|AY160971|ens|ENSMUST00000042740	Abca13	-7.917
A_55_P2150540	ref|NM_010679|ens|ENSMUST00000023726|gb|M80909|gb|BC019634	Lalba	-7.917
A_52_P137371	ref|NM_008255|ens|ENSMUST00000022176|gb|AK079302|gb|BC085083	Hmgcr	-7.895
A_55_P2078994	gb|AK136409|ens|ENSMUST00000108263|riken|9030008F08	Lrrc31	-7.895
A_65_P13713	ref|NM_146005|ref|NM_170689|ref|NM_170690|ref|NM_170729	Ank3	-7.89
A_51_P146505	ref|NM_029570|ens|ENSMUST00000134260|ens|ENSMUST00000125214|ens|ENSMUST00000029257	Atp11b	-7.868
A_52_P675530	ref|NM_183221|ens|ENSMUST00000061260|gb|DQ286572|gb|AK031348	Fat4	-7.857
A_51_P180452	ref|NM_133656|ens|ENSMUST00000168066|ens|ENSMUST00000017920|gb|AK163291	Crk	-7.835
A_52_P313071	ref|NM_016810|ens|ENSMUST00000010536|gb|AK154972|gb|AK133836	Gosr1	-7.83
A_55_P2087322	ref|NM_009023|ens|ENSMUST00000050323|ens|ENSMUST00000111445|ens|ENSMUST00000111446	Rapsn	-7.819
A_52_P1042732	ref|NM_001101471|ens|ENSMUST00000154078|ens|ENSMUST00000095610|gb|AK014386	Akap5	-7.814
A_55_P2000623	ref|NM_009282|ens|ENSMUST00000129269|gb|AK134848|gb|BC062954	Stag1	-7.808
A_52_P339722	ref|NM_146087|gb|AK180731|gb|AK219793|gb|AK147165	Csnk1a1	-7.797
A_51_P398723	ref|NM_010228|ens|ENSMUST00000031653|gb|D88689|gb|L07297	Flt1	-7.787
A_30_P01030672	Unknown	chr15:74476934-74477001_F	-7.787
A_52_P526396	ref|NM_178628|ens|ENSMUST00000021466|gb|AK015327|gb|AK077004	Atl1	-7.781
A_55_P2040031	nap|NAP062632-1	NAP062632-1	-7.776
A_30_P01024754	Unknown	chrX:155945151-155945654_R	-7.77
A_55_P2074381	Unknown	A_55_P2074381	-7.765
A_66_P106238	gb|AK079527|tc|TC1615708|riken|A230021K14|nap|NAP088777-1	Gm5106	-7.76
A_55_P2173601	ens|ENSMUST00000128091|ref|XM_003086374|ref|XM_003085434|tc|TC1652560	ENSMUST00000128091	-7.754
A_55_P2166049	ref|NM_030738|ens|ENSMUST00000086338|gb|AF324870|tc|TC1596838	Vmn1r65	-7.754
A_30_P01027257	Unknown	chr13:114054758-114082339_R	-7.749
A_30_P01024592	Unknown	chrX:148720661-148763177_R	-7.744
A_30_P01019681	Unknown	chr13:98513868-98517366_R	-7.744
A_55_P2067662	ref|NM_001081094|ens|ENSMUST00000098534|tc|TC1669301	Znhit6	-7.733
A_55_P2091230	nap|NAP113008-1	NAP113008-1	-7.733
A_52_P126825	ref|NM_020608|ens|ENSMUST00000073337|gb|AK147411|gb|AK147449	Cramp1l	-7.727
A_55_P2141479	ref|NR_004414|gb|FM991916|gb|BY234655|tc|TC1701275	Rnu2	-7.717
A_55_P2077479	ref|NM_001101562|ens|ENSMUST00000164527	Vmn1r167	-7.717
A_55_P2090933	Unknown	A_55_P2090933	-7.717
A_52_P269672	ref|NM_011447|ens|ENSMUST00000025003|gb|AK032459|gb|BC034551	Sox8	-7.69
A_55_P2060672	ref|NM_010452|ens|ENSMUST00000114434|gb|AK076761|gb|BC096612	Hoxa3	-7.679
A_55_P1957245	nap|NAP113112-1	NAP113112-1	-7.663
A_55_P2001063	ref|NM_028632|ens|ENSMUST00000172241|ens|ENSMUST00000021669|ref|XM_907802	Fcf1	-7.648
A_52_P407796	ref|NM_008618|ens|ENSMUST00000102874|gb|AK008270|gb|AK002404	Mdh1	-7.626
A_30_P01025372	Unknown	chr9:20784567-20799942_R	-7.611
A_55_P1955827	Unknown	A_55_P1955827	-7.605
A_51_P432520	ref|NM_030215|ens|ENSMUST00000021832|gb|AK214516|gb|AK050368	Wrnip1	-7.6
A_55_P2168490	Unknown	A_55_P2168490	-7.595
A_30_P01028428	Unknown	chr5:121759042-121789992_R	-7.595
A_52_P394539	ref|NM_198292|ens|ENSMUST00000042780|gb|AK009520|gb|BC057406	Tex2	-7.589
A_55_P2037922	ref|NM_013721|ens|ENSMUST00000137376|ens|ENSMUST00000143678|ens|ENSMUST00000102898	Rpl7a	-7.553
A_51_P365980	ref|NM_175149|ens|ENSMUST00000034464|gb|AK217083|gb|AK154813	2310022B05Rik	-7.542
A_51_P283649	ref|NM_172724|ref|NM_181066|ens|ENSMUST00000110806|ens|ENSMUST00000165789	Baat1	-7.527
A_55_P2030135	ens|ENSMUST00000137566|ens|ENSMUST00000154677|ens|ENSMUST00000109584|tc|TC1627608	Rbm39	-7.511
A_55_P2162472	ens|ENSMUST00000117580|ens|ENSMUST00000132867|ens|ENSMUST00000138260	ENSMUST00000117580	-7.49
A_55_P2001494	ref|NM_013598|ens|ENSMUST00000099320|ens|ENSMUST00000020129|ens|ENSMUST00000105283	Kitl	-7.475
A_55_P2279685	gb|DV072070	2900076A07Rik	-7.464
A_55_P2086475	Unknown	A_55_P2086475	-7.459
A_52_P204629	ref|NM_021361|ens|ENSMUST00000021438|gb|AK047565|gb|AF232828	Nova1	-7.449
A_51_P390377	ref|NM_144814|gb|BC145469|gb|BC138938|gb|BC138939	Rcor3	-7.444
A_30_P01018721	Unknown	chr3:95502970-95503399_R	-7.402
A_55_P2107347	ref|NM_013835|ens|ENSMUST00000159879|gb|BC051974|gb|BC052380	Trove2	-7.387
A_66_P124755	ref|NM_001252614|ref|NM_016893|ref|NM_001252616|ref|NM_001252615	Fut8	-7.377
A_55_P2138961	ref|NM_013861|ens|ENSMUST00000114644|ens|ENSMUST00000067888|gb|AK087844	Tpk1	-7.372
A_30_P01027720	Unknown	chr17:32229024-32229663_F	-7.356
A_66_P111562	ref|NM_007631|ens|ENSMUST00000093962|gb|S78355|gb|AK203926	Ccnd1	-7.356
A_55_P2073699	ref|NM_009761|ens|ENSMUST00000138160|ens|ENSMUST00000022634|gb|AK013467	Bnip3l	-7.341
A_55_P2076543	ref|XM_001476757|ref|XM_003086733	Gm10144	-7.341
A_51_P137094	ref|NM_015772|ref|NM_001244916|ens|ENSMUST00000163383|ens|ENSMUST00000058326	Sall2	-7.306
A_51_P441782	ref|NM_028643|ens|ENSMUST00000022543|gb|AK031692|gb|AK215431	Efha1	-7.285
A_51_P393454	ref|NM_001025074|gb|AK160789|tc|TC1604716|riken|3221403I19	Ntrk2	-7.28
A_52_P632423	ref|NM_172868|ens|ENSMUST00000102904|ens|ENSMUST00000102905|gb|AK045344	Palm2	-7.28
A_30_P01031578	Unknown	chr6:5311375-5328075_F	-7.28
A_30_P01032207	Unknown	chr1:183951156-183986156_R	-7.275
A_55_P2118744	ref|NM_001253916|ref|NM_019982|ref|NM_001253917|ens|ENSMUST00000075387	Sez6l	-7.26
A_51_P342535	ref|NM_001033142|ens|ENSMUST00000014614|gb|AK216687|gb|AK151813	Rnf166	-7.255
A_55_P2185548	ref|NM_153599|ens|ENSMUST00000159615|ens|ENSMUST00000031640|ens|ENSMUST00000162494	Cdk8	-7.225
A_55_P1967776	ref|NM_018760|ref|NM_001197147|ref|NM_001136260|ens|ENSMUST00000148750	Slc4a4	-7.22
A_55_P2082625	nap|NAP061666-1	NAP061666-1	-7.215
A_55_P2333126	gb|AK088506|gb|AK054352|gb|AK045615|tc|TC1583862	E330018D03Rik	-7.2
A_30_P01023243	Unknown	chr2:25774411-25783736_F	-7.195
A_30_P01020570	Unknown	chr12:73838608-73862621_F	-7.195
A_52_P682382	ref|NM_009127|ens|ENSMUST00000041331|gb|AK012370|gb|AK078704	Scd1	-7.19
A_51_P467837	ref|NM_029505|ref|NM_001122820|ens|ENSMUST00000163739|ens|ENSMUST00000050229	Ap3m2	-7.19
A_55_P1961700	ens|ENSMUST00000027905|gb|DQ463440|ens|ENSMUST00000127077|tc|TC1698426	Ush2a	-7.18
A_51_P434426	ref|NM_203507|ens|ENSMUST00000033973|gb|AK004597|gb|BC016198	Rwdd4a	-7.175
A_55_P2006499	ref|NM_001243792|ref|NM_011935|ens|ENSMUST00000110939|ens|ENSMUST00000027906	Esrrg	-7.135
A_55_P2117711	ref|NM_145355|ens|ENSMUST00000064364|ens|ENSMUST00000077078|ens|ENSMUST00000110026	Rnf185	-7.13
A_55_P2152164	ref|XM_972614|ref|XM_003084706|nap|NAP113963-1	Gm7339	-7.126
A_30_P01029540	Unknown	chr1:134171292-134176062_R	-7.121
A_51_P241210	ref|NM_001081231|ref|NM_029990|gb|AK076730|gb|AK033906	Lhfpl3	-7.121
A_55_P2379510	gb|AK081638|riken|C130058A18|nap|NAP089826-1	LOC628062	-7.106
A_55_P2105035	ens|ENSMUST00000058881|ref|XM_357814|ref|XM_003086611|nap|NAP062832-1	ENSMUST00000058881	-7.101
A_55_P2059105	ref|NR_045093|gb|BC099610|ens|ENSMUST00000110230|ens|ENSMUST00000100659	Gm9920	-7.101
A_30_P01019645	Unknown	chr14:21029450-21049451_F	-7.096
A_51_P141836	ref|NM_133907|ens|ENSMUST00000049453|gb|AK122187|gb|AK046056	Ube3c	-7.091
A_55_P2091297	ens|ENSMUST00000108646	ENSMUST00000108646	-7.081
A_51_P265545	ref|NM_025382|ens|ENSMUST00000150031|ens|ENSMUST00000030628|gb|AK014449	Tmem57	-7.076
A_66_P130582	ref|NM_010881|ens|ENSMUST00000085814|ens|ENSMUST00000072464|gb|AK086638	Ncoa1	-7.067
A_55_P2138177	ref|NM_177698|ref|NM_030263|ref|NM_027626|ens|ENSMUST00000098696	Psd3	-7.052
A_55_P2141008	ens|ENSMUST00000171077|ens|ENSMUST00000169250|gb|AK080658|ens|ENSMUST00000121492	Siglech	-7.047
A_55_P2068429	ref|NM_145591|ref|NM_001201330|ref|NM_001033157|ref|NM_001163064	Zfp958	-7.042
A_55_P1967672	ref|NM_207017|ens|ENSMUST00000067539|gb|BC127604|gb|BC156834	Tas2r109	-7.037
A_52_P652336	ens|ENSMUST00000018842|gb|AK141086|gb|AK080848|gb|AK049786	Lhx1	-7.027
A_52_P648424	ref|NM_010890|ens|ENSMUST00000034740|gb|AK122203|gb|BC007184	Nedd4	-7.023
A_55_P2180680	ref|NM_020288|ens|ENSMUST00000074674|gb|BC146326|gb|BC148811	Olfr749	-7.023
A_51_P368757	ref|NM_008069|gb|BC130258|gb|U14418|gb|X55273	Gabrb1	-7.023
A_55_P1961968	ref|NM_009538|ens|ENSMUST00000105548|gb|AK142210|gb|AK142052	Plagl1	-6.998
A_30_P01021097	Unknown	chr5:149947200-149979950_F	-6.993
A_52_P171212	ref|NM_010570|ens|ENSMUST00000069799|gb|AK045317|gb|X69722	Irs1	-6.989
A_55_P1955502	ref|NM_134063|ens|ENSMUST00000096069|gb|AK220437|gb|AK128934	BC016423	-6.984
A_52_P625808	ref|NM_031179|ens|ENSMUST00000027127|gb|AK048521|gb|AK077993	Sf3b1	-6.979
A_55_P2068137	nap|NAP111750-1	NAP111750-1	-6.974
A_30_P01020395	Unknown	chr8:19792940-19798868_F	-6.969
A_55_P2455725	ref|NM_001039482|ens|ENSMUST00000117467|ens|ENSMUST00000140905|ens|ENSMUST00000111611	Klhl20	-6.964
A_55_P2200628	gb|AK014629|riken|4733401D01|nap|NAP073220-1	4733401D01Rik	-6.955
A_55_P2069392	Unknown	A_55_P2069392	-6.936
A_51_P224593	ref|NM_026823|ens|ENSMUST00000027684|gb|AK004080|gb|BC018479	Arl8a	-6.931
A_55_P2007640	ref|NM_029735|ens|ENSMUST00000046514|gb|X54327|gb|AK166460	Eprs	-6.916
A_52_P503730	ref|NM_199012|ref|NM_001146010|ens|ENSMUST00000098250|ens|ENSMUST00000032931	Fchsd2	-6.916
A_51_P162176	ref|NM_013718|ens|ENSMUST00000030660|gb|AK004299|gb|AK168518	Trappc3	-6.883
A_55_P2022337	ref|NM_007856|ens|ENSMUST00000073878|ens|ENSMUST00000141916|ens|ENSMUST00000124340	Dhcr7	-6.873
A_55_P1978366	tc|TC1664423	TC1664423	-6.873
A_52_P206613	ref|NM_007422|ens|ENSMUST00000159184|ens|ENSMUST00000016105|gb|AK010263	Adss	-6.869
A_30_P01019988	Unknown	chr5:31862823-31871445_F	-6.85
A_66_P137219	ref|NM_015779|ens|ENSMUST00000046091|gb|AK143710|gb|E02657	Elane	-6.85
A_52_P471292	ref|NM_146786|ens|ENSMUST00000057755|tc|TC1762828|nap|NAP021187-001	Olfr914	-6.845
A_51_P509489	ref|NM_021284|ens|ENSMUST00000032399|gb|BC141051|gb|AK155064	Kras	-6.845
A_66_P112436	ref|NM_011158|ens|ENSMUST00000146865|ens|ENSMUST00000036497|gb|AK218624	Prkar2b	-6.84
A_30_P01017437	Unknown	chr12:81221532-81232030_F	-6.835
A_55_P2183498	ref|NM_025668|gb|AK134578|riken|6330417H18	Spcs2	-6.831
A_55_P2017894	ref|NM_009307|gb|AK036357|tc|TC1587594|tc|TC1686828	Syt2	-6.826
A_55_P2027142	Unknown	A_55_P2027142	-6.826
A_52_P98614	ref|NM_009209|ens|ENSMUST00000072939|gb|AK078616|gb|AY188506	Slc6a2	-6.821
A_55_P1982699	ref|NM_001167148|ref|NM_001167149|ref|NM_001166708|ref|NM_001166836	Gm16442	-6.821
A_51_P398467	ref|NM_133889|ens|ENSMUST00000048162|gb|AK037201|gb|AK144053	Bsdc1	-6.812
A_51_P151484	ref|NM_009721|ens|ENSMUST00000027863|gb|X16646|gb|AK010677	Atp1b1	-6.802
A_55_P2104790	ens|ENSMUST00000095471|gb|BC110678|gb|AF283559|gb|BC091730	ENSMUST00000095471	-6.802
A_55_P2075000	Unknown	A_55_P2075000	-6.797
A_52_P455428	ref|NM_183427|ens|ENSMUST00000058787|gb|AK139335|gb|AK135134	Glra2	-6.793
A_55_P2048813	nap|NAP068610-1	NAP068610-1	-6.783
A_55_P2164070	ref|NM_028736|ref|NM_130891|ref|NM_133442|ens|ENSMUST00000138410	Grip1	-6.774
A_51_P517094	ref|NM_013664|ref|NM_001252471|ens|ENSMUST00000003268|gb|AK154836	Sh3gl1	-6.769
A_55_P2084092	ref|NM_147060|ens|ENSMUST00000071362|tc|TC1600315	Olfr667	-6.765
A_55_P2358002	ref|NM_027314|gb|AK017741|tc|TC1639247|riken|5730499H23	2014-03-05	-6.755
A_55_P2052754	ref|NM_023662|ens|ENSMUST00000045218|ens|ENSMUST00000045199|gb|BC139033	Pcm1	-6.737
A_52_P276792	ref|NM_053202|ref|NM_001197321|ref|NM_001197322|ens|ENSMUST00000113322	Foxp1	-6.718
A_66_P116299	ref|NM_019663|ens|ENSMUST00000098651|ens|ENSMUST00000116566|gb|AK187989	Pias1	-6.713
A_55_P1987131	ref|NM_177727|ens|ENSMUST00000164284|ens|ENSMUST00000094250|ens|ENSMUST00000058764	Lsm14b	-6.713
A_51_P363525	ref|NM_028596|ref|NM_001142642|ens|ENSMUST00000069483|ens|ENSMUST00000086653	Fbrsl1	-6.713
A_55_P2025855	ref|NM_144922|ens|ENSMUST00000043765|gb|BC021506|gb|AK155604	Hnrnpul1	-6.704
A_51_P130994	ens|ENSMUST00000019276|gb|BC005537|gb|AK050530|gb|BC002217	BC005537	-6.704
A_55_P1979126	ref|NM_009446|ens|ENSMUST00000088246|gb|BC089547|tc|TC1680129	Tuba3a	-6.704
A_52_P325527	ref|NM_010103|ref|NM_001037987|ens|ENSMUST00000081769|ens|ENSMUST00000043111	Edil3	-6.699
A_30_P01028492	Unknown	chr16:93121505-93142255_R	-6.695
A_55_P2098802	ref|NM_025352|ens|ENSMUST00000109021|ens|ENSMUST00000156503|ens|ENSMUST00000061326	Uqcrq	-6.69
A_52_P143346	ref|NM_001163191|ens|ENSMUST00000060241|gb|BC153817|nap|NAP025773-001	Otud6a	-6.676
A_52_P366932	ref|NM_010301|ens|ENSMUST00000043604|gb|AK143685|gb|AK088773	Gna11	-6.676
A_55_P2138071	Unknown	A_55_P2138071	-6.662
A_30_P01019644	Unknown	chr6:126766225-126771309_F	-6.662
A_55_P2175095	ref|NM_011384|ens|ENSMUST00000021519|gb|AK029309|riken|4832418K20	Six6	-6.658
A_51_P222590	ref|NM_007481|ens|ENSMUST00000050063|gb|AK156960|gb|AK006366	Arf6	-6.648
A_51_P361788	ref|NM_013933|ens|ENSMUST00000024897|gb|AK088132|gb|AK167381	Vapa	-6.644
A_55_P1999849	Unknown	A_55_P1999849	-6.639
A_66_P116154	ref|NM_133196|ens|ENSMUST00000149658|ens|ENSMUST00000033609|gb|AK147438	Cstf2	-6.63
A_55_P2084763	ens|ENSMUST00000099425|ref|XR_105554|ref|XR_106796|gb|AK131965	ENSMUST00000099425	-6.625
A_55_P2157200	nap|NAP096950-001	NAP096950-001	-6.625
A_52_P137378	ref|NM_178143|ens|ENSMUST00000030243|gb|AK044030|gb|AK020297	Prkaa2	-6.607
A_55_P2102540	ref|NM_133859|gb|AK002518|gb|AK076084|gb|BC005485	Olfml3	-6.607
A_55_P2062921	ens|ENSMUST00000051774|ens|ENSMUST00000113399|ens|ENSMUST00000113401|ens|ENSMUST00000113398	Epha5	-6.602
A_30_P01017550	Unknown	chr2:36112819-36114110_F	-6.602
A_52_P282700	ref|NM_020256|ref|NM_001079513|ens|ENSMUST00000049740|gb|AK080301	Zbtb33	-6.589
A_30_P01030742	Unknown	chr2:31001736-31006911_R	-6.584
A_55_P2037797	ref|NM_027966|gb|BC100497	1700019O17Rik	-6.575
A_55_P2393483	gb|AK032533|tc|TC1627424|riken|6430584L05|nap|NAP075109-1	6430584L05	-6.57
A_55_P1955269	ref|NM_030219|ens|ENSMUST00000035026|gb|AK019654|tc|TC1590524	Trim42	-6.566
A_51_P168695	ref|NM_175171|ens|ENSMUST00000167058|gb|AK137360|gb|AK090136	Mast4	-6.561
A_30_P01018122	Unknown	chr2:77715502-77719430_F	-6.561
A_66_P123449	tc|TC1701181	TC1701181	-6.548
A_55_P1969670	ref|NM_199021|ens|ENSMUST00000112606|ens|ENSMUST00000112603|ens|ENSMUST00000035420	Dpp10	-6.543
A_51_P183971	ref|NM_019446|ref|NM_001164186|ens|ENSMUST00000113847|ens|ENSMUST00000113849	Barhl1	-6.543
A_30_P01024530	Unknown	chr11:97275905-97310538_R	-6.539
A_55_P1996983	ref|NM_001034856|gb|AK132831|ens|ENSMUST00000089060|tc|TC1593575	4930430D24Rik	-6.539
A_52_P89049	ref|NM_011807|ref|NM_001243046|ref|NM_001243047|gb|AK032411	Dlg2	-6.525
A_55_P2045549	ref|NM_172920|ens|ENSMUST00000115277|ens|ENSMUST00000152480|ens|ENSMUST00000034446	Dpy19l1	-6.512
A_52_P253915	ref|NM_138651|ens|ENSMUST00000138194|ens|ENSMUST00000103181|ens|ENSMUST00000089461	Cds2	-6.507
A_55_P2088945	ref|NM_021387|ens|ENSMUST00000044705|gb|AB030198|gb|AK020370	Vstm2b	-6.507
A_55_P2049052	ens|ENSMUST00000119739	Otx2	-6.507
A_30_P01026145	Unknown	chr4:32294119-32294941_F	-6.498
A_55_P2148748	ref|NM_001111053|ref|NM_001195540|ref|NM_001195538|ref|NM_001111051	Dclk1	-6.489
A_55_P2103880	ref|NM_020331|ref|NM_001081464|ref|NM_001081465|ref|NM_001081466	Gtf2ird1	-6.485
A_55_P2017998	ens|ENSMUST00000085979	Abcg4	-6.48
A_55_P2261772	gb|AK082735|gb|DT907413|riken|C230098O21|nap|NAP019428-001	C230098O21Rik	-6.48
A_52_P480544	ref|NM_145390|ref|NM_001122843|ens|ENSMUST00000166592|ens|ENSMUST00000093360	Tnpo2	-6.476
A_55_P2073482	ref|XR_104680|ref|XR_107372|nap|NAP000079-001|nap|NAP108483-1	Gm13430	-6.471
A_30_P01026233	Unknown	chr8:119739165-119739905_F	-6.467
A_55_P2033849	ref|NM_172430|ens|ENSMUST00000056934|gb|AK122538|gb|BC060217	Sphkap	-6.444
A_52_P97192	ref|NM_026170|ens|ENSMUST00000167662|gb|AK194366|gb|AK036300	Ergic1	-6.44
A_55_P1956464	ref|NM_011484|ens|ENSMUST00000102960|gb|AK162431|gb|AK164191	Stam	-6.44
A_55_P2118090	nap|NAP092744-001	NAP092744-001	-6.44
A_51_P329413	ref|NM_029786|ref|NM_026651|ens|ENSMUST00000106498|ens|ENSMUST00000121052	Pomgnt1	-6.44
A_55_P2398788	ref|NM_009548|ens|ENSMUST00000058348|ens|ENSMUST00000060255|ens|ENSMUST00000102661	Rnf112	-6.422
A_55_P2107647	Unknown	A_55_P2107647	-6.413
A_52_P665675	ref|NM_013454|ens|ENSMUST00000030010|gb|AK045442|gb|DJ026144	Abca1	-6.409
A_51_P148959	ref|NM_028136|ens|ENSMUST00000029336|gb|AF448804|gb|AK013031	Dhx36	-6.404
A_55_P1992227	ref|NM_001081329|gb|BC028272|gb|BC054371|tc|TC1585863	Zkscan2	-6.404
A_30_P01032621	Unknown	chr14:65430484-65432413_R	-6.404
A_55_P2094966	ref|NM_178215|ref|NM_054045|ens|ENSMUST00000091711|ens|ENSMUST00000098843	Hist2h3b	-6.386
A_55_P1979341	ref|NM_007806|ens|ENSMUST00000108893|ens|ENSMUST00000017604|gb|AK171748	Cyba	-6.386
A_66_P109562	ref|XM_890719|nap|NAP000039-001	Gm12271	-6.386
A_55_P2249536	ref|NM_175294|ref|NM_001145804|ens|ENSMUST00000062264|gb|BC039951	Nucks1	-6.382
A_66_P114167	gb|AK021392|tc|TC1620189|riken|E130116L18|nap|NAP124523-1	E130116L18Rik	-6.373
A_51_P392005	ref|NM_007592|ens|ENSMUST00000066674|gb|AK004896|gb|EU234006	Car8	-6.369
A_66_P117417	ens|ENSMUST00000023335|gb|AK013863|tc|TC1600463|riken|3000002N23	Pvrl3	-6.36
A_51_P212801	ref|NM_019668|ens|ENSMUST00000016452|gb|AF089812|gb|AF383148	Ube2a	-6.351
A_51_P353392	ref|NM_019936|ens|ENSMUST00000024959|gb|AF151637|gb|AK008523	Cript	-6.351
A_51_P253883	ref|NM_029758|ref|NM_001146119|ens|ENSMUST00000069066|ens|ENSMUST00000167108	Fam49a	-6.347
A_55_P1979669	ref|NM_198003|ens|ENSMUST00000088763|ens|ENSMUST00000120222|gb|AK004870	Zfp946	-6.342
A_30_P01026835	Unknown	chr14:55433382-55452757_R	-6.338
A_55_P2017804	ref|NM_009942|ens|ENSMUST00000081180|ens|ENSMUST00000168827|ref|XM_001475417	Cox5b	-6.338
A_52_P578581	ref|NM_170599|ens|ENSMUST00000023478|gb|BC057555|gb|BE983147	Igsf11	-6.333
A_55_P2002357	ref|NM_178242|ens|ENSMUST00000036253|ens|ENSMUST00000151477|gb|BC049818	Tnrc18	-6.333
A_51_P184062	ref|NM_019702|ref|NM_001042593|ens|ENSMUST00000020153|gb|AK168671	Hbs1l	-6.329
A_55_P2105843	Unknown	A_55_P2105843	-6.329
A_30_P01017515	Unknown	chr1:183832694-183834125_R	-6.325
A_55_P2106394	ref|NM_026412|gb|BC031709|gb|AK012148|gb|AK006328	D2Ertd750e	-6.316
A_52_P248604	ref|NM_009868|ens|ENSMUST00000034339|gb|AK164474|gb|AK167620	Cdh5	-6.312
A_55_P2079430	ens|ENSMUST00000028829|gb|AK155065|gb|AK042131|gb|AK136760	Spred1	-6.307
A_55_P2147220	ref|NM_016895|ens|ENSMUST00000102604|gb|AK010951|gb|AK010936	Ak2	-6.307
A_55_P1970841	ref|NM_011630|ens|ENSMUST00000146175|ens|ENSMUST00000113460|gb|AK137373	Nr2c2	-6.298
A_66_P111433	Unknown	A_66_P111433	-6.285
A_51_P520849	ref|NM_009144|ens|ENSMUST00000029625|gb|D50462|gb|AK147091	Sfrp2	-6.277
A_66_P134252	ref|XM_001474505|ref|XM_001476039|nap|NAP026882-1	Gm12471	-6.272
A_51_P223929	ref|NM_138679|ens|ENSMUST00000090933|gb|AF247132|gb|AK031724	Ash1l	-6.268
A_55_P2052006	ref|NM_199024|ref|NM_001161483|ens|ENSMUST00000081423|ens|ENSMUST00000171159	Nol4	-6.264
A_52_P629037	ref|XM_894492|ref|XM_904627|ref|XM_003085276|ref|XM_003086842	Gm6987	-6.255
A_30_P01024352	Unknown	chr9:113650590-113670786_F	-6.251
A_55_P2161903	ref|NM_011025|ens|ENSMUST00000028764|gb|AK003042|tc|TC1590188	Oxt	-6.251
A_51_P257885	ref|NM_175217|gb|AK015833|gb|AY424299|gb|BC025064	Mmd2	-6.246
A_55_P2156229	ref|NM_007648|ens|ENSMUST00000102832|gb|J02990|tc|TC1588586	Cd3e	-6.242
A_55_P2010116	ref|NM_030554|ref|NM_001082553|ens|ENSMUST00000069749|ens|ENSMUST00000117692	Rab27b	-6.242
A_51_P149455	ref|NM_007381|ens|ENSMUST00000027153|gb|AK167537|gb|AK005140	Acadl	-6.238
A_55_P2020602	ref|NM_178365|ens|ENSMUST00000114873|ens|ENSMUST00000097360|ens|ENSMUST00000114872	Pacsin1	-6.238
A_52_P72839	ref|NM_009147|ens|ENSMUST00000021375|gb|AK028152|gb|BC034610	Sec23a	-6.229
A_51_P516133	ref|NM_015786|ens|ENSMUST00000040914|gb|AK216922|gb|AK216099	Hist1h1c	-6.225
A_55_P2387284	gb|BC099970|tc|TC1646119|nap|NAP041479-1	BC099970	-6.216
A_55_P2000127	ref|NM_009365|ens|ENSMUST00000070656|ens|ENSMUST00000167965|ens|ENSMUST00000168825	Tgfb1i1	-6.207
A_51_P383629	ref|NM_126165|ens|ENSMUST00000034388|gb|AK169949|gb|AK159117	Vps4a	-6.203
A_55_P2045777	nap|NAP095730-001	NAP095730-001	-6.195
A_55_P2110601	ref|NM_001083937|ens|ENSMUST00000033496|ens|ENSMUST00000115660|gb|AK155755	Slc35a2	-6.195
A_52_P132074	ens|ENSMUST00000107533|gb|DQ656357|gb|AK045521|riken|B230208H21	A230006K03Rik	-6.195
A_55_P2041910	ens|ENSMUST00000100555|ref|XM_981687|ref|XM_909126|nap|NAP029396-1	Gm7935	-6.19
A_55_P2089362	ref|NM_001012704|ens|ENSMUST00000088260|gb|AY542486|gb|AY542487	Wfdc13	-6.19
A_30_P01020910	Unknown	chr2:117781720-117937595_R	-6.186
A_51_P270949	ref|NM_020034|ens|ENSMUST00000080511|gb|AK020117|gb|BC114579	Hist1h1b	-6.16
A_30_P01028808	Unknown	chr10:126817846-126827484_F	-6.16
A_55_P2036883	ref|NM_175666|gb|BG973412|tc|TC1595438|nap|NAP058486-1	Hist2h2bb	-6.16
A_55_P2079967	ref|NM_008580|ens|ENSMUST00000095806|gb|AK078668|tc|TC1598876	Map3k5	-6.152
A_52_P312467	ref|NM_001079869|ref|NM_010458|tc|TC1708740|nap|NAP036282-1	Hoxb3	-6.152
A_51_P157255	ref|NM_008304|ens|ENSMUST00000022871|gb|U00674|gb|AK011042	Sdc2	-6.143
A_66_P107038	ref|NM_028243|ens|ENSMUST00000076052|gb|AK051677|gb|AK083719	Prcp	-6.139
A_30_P01023742	Unknown	chr14:62263564-62307496_R	-6.135
A_55_P2076805	ens|ENSMUST00000106778|tc|TC1768397|tc|TC1633406	ENSMUST00000106778	-6.135
A_52_P636151	ref|NM_025673|ens|ENSMUST00000059680|ens|ENSMUST00000165551|gb|AK028409	Golph3	-6.13
A_51_P209327	ref|NM_013912|ens|ENSMUST00000039026|gb|AK020057|gb|BC020015	Apln	-6.126
A_55_P2006236	ref|NM_009466|ens|ENSMUST00000125375|ens|ENSMUST00000031103|gb|AK146693	Ugdh	-6.118
A_52_P581435	ref|NM_008810|ens|ENSMUST00000033662|gb|AK148459|gb|AK145718	Pdha1	-6.109
A_52_P590392	ref|NM_016676|ens|ENSMUST00000021001|gb|AK166010|gb|AK028320	Rab10	-6.105
A_55_P2058189	ref|NM_029875|ens|ENSMUST00000079041|gb|BC057101|gb|AK020379	Slc35e3	-6.097
A_55_P2132039	Unknown	A_55_P2132039	-6.097
A_51_P453948	ref|NM_007879|ens|ENSMUST00000139430|ens|ENSMUST00000020741|gb|AK144438	Drg1	-6.097
A_52_P207635	ref|NM_001033261|ens|ENSMUST00000127283|ens|ENSMUST00000036044|gb|AK161448	Zfc3h1	-6.092
A_51_P196509	ref|NM_023900|ens|ENSMUST00000036805|gb|AK088567|gb|AK051734	Plekhj1	-6.088
A_52_P638895	ref|NM_001025250|ref|NM_009505|ref|NM_001025257|ref|NM_001110266	Vegfa	-6.084
A_55_P2156776	ens|ENSMUST00000069431|ref|XR_105412|ref|XR_106532|gb|AK081416	ENSMUST00000069431	-6.084
A_51_P469902	gb|AK046876|gb|AK163652|gb|AK138802|gb|AK138564	Ggps1	-6.071
A_55_P2135049	ens|ENSMUST00000171512|ens|ENSMUST00000171351|nap|NAP028846-1	ENSMUST00000171512	-6.071
A_55_P2051864	ens|ENSMUST00000023534|ens|ENSMUST00000135406	ENSMUST00000023534	-6.071
A_52_P684087	gb|AK005214|gb|BC092234|tc|TC1669747|tc|TC1671543	AK005214	-6.071
A_51_P502225	ref|NM_019687|ens|ENSMUST00000020586|gb|AB016257|gb|AK143595	Slc22a4	-6.063
A_55_P2067483	Unknown	A_55_P2067483	-6.059
A_55_P2170094	ref|NM_001143755|gb|AK006931|ens|ENSMUST00000106104|tc|TC1619094	Lrrc27	-6.054
A_55_P2078266	ref|NM_008210|ref|NM_001081019|ens|ENSMUST00000076595|ens|ENSMUST00000162814	H3f3a	-6.046
A_55_P2090459	Unknown	A_55_P2090459	-6.042
A_51_P379552	ref|NM_177006|gb|AK014189|gb|AB093290|gb|BC062655	3110047P20Rik	-6.042
A_52_P524895	ref|NM_010123|ens|ENSMUST00000025955|gb|U14172|tc|TC1573978	Eif3a	-6.034
A_52_P72497	ref|NM_133225|ens|ENSMUST00000027780|gb|AK168799|gb|AK030371	Acbd3	-6.029
A_55_P1955472	ref|NM_001033128|ens|ENSMUST00000053506|gb|BC076577|tc|TC1600927	Bbs1	-6.029
A_52_P543824	ref|NM_026499|ens|ENSMUST00000130411|gb|AK146293|gb|AK133872	Srsf6	-6.029
A_52_P254149	ref|NM_153134|ens|ENSMUST00000049020|gb|BC056347|gb|BC080294	Irgq	-6.025
A_55_P2185214	ref|XM_003086350|ref|XM_001472912|nap|NAP097744-001	Gm11810	-6.004
A_30_P01025590	Unknown	chr5:88995039-89009064_R	-5.992
A_52_P175679	ref|NM_001007077|ref|NM_178657|ref|NM_001105254|ref|NM_001177542	Gm13023	-5.992
A_51_P498720	ref|NM_009784|ref|NM_001110843|ref|NM_001110844|ref|NM_001110845	Cacna2d1	-5.984
A_55_P2014337	ref|NM_007520|ens|ENSMUST00000026703	Bach1	-5.979
A_52_P420308	ens|ENSMUST00000109401|gb|BC058670|gb|CJ256519|tc|TC1688325	Tnpo1	-5.979
A_55_P2002567	ens|ENSMUST00000077747|nap|NAP111305-1|nap|NAP111327-1|nap|NAP114267-1	Gm9234	-5.979
A_51_P494361	ref|NM_175341|ref|NM_207515|ens|ENSMUST00000088418|ens|ENSMUST00000088419	Mbnl2	-5.963
A_52_P579640	ref|NM_021511|ens|ENSMUST00000072079|gb|AK214958|gb|AK013172	Rrs1	-5.963
A_55_P2120682	ref|NM_020585|ref|NM_001042484|ens|ENSMUST00000121783|ens|ENSMUST00000051094	Golga7	-5.959
A_55_P2044458	ref|NM_172877|ens|ENSMUST00000059790|ens|ENSMUST00000037356|gb|AK029142	Pramef8	-5.946
A_55_P2194958	ref|NM_010905|ref|NM_001122953|ref|NM_001122952|ens|ENSMUST00000075448	Nfia	-5.946
A_52_P167189	ref|NM_026921|ens|ENSMUST00000057115|gb|AK041946|gb|AK153820	Isca1	-5.946
A_51_P331870	ref|NM_028862|ens|ENSMUST00000019333|gb|AK014408|gb|AK043002	Rnf145	-5.942
A_30_P01020988	Unknown	chr18:73870981-73877247_F	-5.938
A_55_P2370096	gb|BB453506|tc|TC1694897|tc|TC1625780	BB453506	-5.938
A_52_P480360	ref|NM_023595|ref|NM_001159646|ens|ENSMUST00000082122|ens|ENSMUST00000051605	Dut	-5.934
A_55_P1952324	gb|CF550882	CF550882	-5.922
A_52_P606774	ref|NM_021420|ens|ENSMUST00000018353|gb|AK085750|gb|AK043385	Stk4	-5.918
A_30_P01027121	Unknown	chr17:6265275-6362150_R	-5.905
A_55_P2094852	ref|NM_019400|ens|ENSMUST00000100928|ens|ENSMUST00000142220|ens|ENSMUST00000108533	Rabep1	-5.905
A_30_P01027949	Unknown	chr12:110944403-110988678_F	-5.905
A_30_P01027241	Unknown	chr4:55593675-55629225_R	-5.897
A_55_P2173968	ref|NM_133710|ens|ENSMUST00000073109|ens|ENSMUST00000174132|gb|AK013115	Ctdspl	-5.893
A_52_P110291	ref|NM_174852|ens|ENSMUST00000049167|gb|AK155354|gb|AK129383	Phf12	-5.885
A_30_P01027558	Unknown	chr7:99879368-99889978_F	-5.881
A_30_P01023030	Unknown	chr6:91284617-91285070_R	-5.881
A_55_P2066230	ref|NM_001172117|ref|NM_010407|ens|ENSMUST00000003370|ens|ENSMUST00000109799	Hck	-5.864
A_55_P2160563	ref|NM_025450|ens|ENSMUST00000121339|ens|ENSMUST00000121813|ens|ENSMUST00000118420	Mrps17	-5.86
A_51_P205968	ref|NM_026912|ens|ENSMUST00000025702|gb|AK197572|gb|AK005338	Snx15	-5.86
A_55_P1981739	ref|NM_021720|ens|ENSMUST00000123893|ens|ENSMUST00000023682|ens|ENSMUST00000139324	Donson	-5.856
A_30_P01027139	Unknown	chr13:94182877-94203935_R	-5.856
A_52_P531662	ref|NM_027412|ens|ENSMUST00000096751|gb|AK039321|gb|AK169288	Ttc9c	-5.852
A_51_P330133	ref|NM_025682|ens|ENSMUST00000022507|gb|AK011272|gb|AK169737	Pspc1	-5.848
A_51_P185509	ref|NM_007896|ens|ENSMUST00000028981|gb|AK087318|gb|AK035661	Mapre1	-5.836
A_55_P2296641	gb|AK015427|tc|TC1596934|riken|4930449A18|nap|NAP016404-001	4930449A18Rik	-5.836
A_52_P651248	ref|NM_178395|gb|AK030662|riken|5430408L04	Zdhhc2	-5.832
A_55_P2017972	ref|NM_011404|ens|ENSMUST00000168262|ens|ENSMUST00000045557|gb|AB017189	Slc7a5	-5.824
A_30_P01032051	Unknown	chr4:56013597-56020622_F	-5.82
A_52_P655663	ref|NM_010376|ref|NM_001159551|ens|ENSMUST00000125366|gb|AK171790	H13	-5.812
A_55_P1985298	ref|NM_027844|ref|NM_001037822|ens|ENSMUST00000067978|ens|ENSMUST00000097943	Krtap5-2	-5.808
A_51_P227275	ens|ENSMUST00000001667|gb|AK085710|gb|M10114|gb|AK164788	Csn3	-5.804
A_66_P101755	ref|NM_013672|gb|AK003347|ens|ENSMUST00000001326|tc|TC1602893	Sp1	-5.804
A_55_P2130945	Unknown	A_55_P2130945	-5.8
A_51_P232901	ref|NM_009923|ref|NM_001146318|ens|ENSMUST00000150414|ens|ENSMUST00000103120	Cnp	-5.796
A_51_P472867	ref|NM_145226|ens|ENSMUST00000044833|gb|BC141055|gb|AF453830	Oas3	-5.796
A_51_P259118	ref|NM_053105|ens|ENSMUST00000022666|gb|AK220397|gb|AK031932	Klhl1	-5.796
A_30_P01029294	Unknown	chr13:94182877-94203852_F	-5.788
A_51_P413916	ref|NM_027558|ens|ENSMUST00000058578|gb|AK014543|gb|AK140064	Pgrmc2	-5.78
A_51_P433026	ref|NM_028922|ens|ENSMUST00000045674|gb|AK149181|gb|AK016572	Ppapdc2	-5.78
A_30_P01032185	Unknown	chr8:91471819-91551119_F	-5.776
A_55_P1976112	ref|NM_178692|ens|ENSMUST00000048308|gb|AK081755|tc|TC1585230	C130074G19Rik	-5.776
A_51_P502152	ref|NM_031196|ref|NM_001199271|ens|ENSMUST00000105410|ens|ENSMUST00000144234	Slc19a1	-5.768
A_65_P10180	ref|NM_009011|ens|ENSMUST00000107621|ens|ENSMUST00000030134|gb|AK167582	Rad23b	-5.768
A_55_P2175579	ref|NM_146694|ens|ENSMUST00000075868|tc|TC1636706|nap|NAP029402-1	Olfr1466	-5.768
A_51_P411264	ref|NM_172597|ens|ENSMUST00000123879|ens|ENSMUST00000139526|gb|AK173153	Txndc16	-5.764
A_55_P2157048	ref|NM_027326|ref|NM_029931|ens|ENSMUST00000097995|ens|ENSMUST00000078090	Mllt3	-5.76
A_51_P140797	ref|NM_028759|ens|ENSMUST00000027856|gb|AK004618|gb|AK077238	Dcaf6	-5.76
A_55_P2051099	ref|NM_011609|ens|ENSMUST00000164813|ens|ENSMUST00000032491|gb|AK159989	Tnfrsf1a	-5.76
A_55_P2032165	ens|ENSMUST00000164923|ens|ENSMUST00000085340|nap|NAP093932-001|nap|NAP093888-001	ENSMUST00000164923	-5.748
A_30_P01025458	Unknown	chr11:50994911-51050704_R	-5.748
A_55_P2143179	ref|NM_001011798|ens|ENSMUST00000115003|ens|ENSMUST00000077732|nap|NAP108628-1	Olfr884	-5.744
A_65_P03442	ref|NM_008828|ens|ENSMUST00000135949|ens|ENSMUST00000081593|gb|AK216492	Pgk1	-5.74
A_55_P2088095	nap|NAP092770-001	NAP092770-001	-5.736
A_55_P2148210	ref|NM_001166631|ref|NM_134248|ref|NM_001166632|ens|ENSMUST00000109223	Havcr1	-5.736
A_51_P317181	ref|NM_053146|gb|AF326314|tc|TC1597801|nap|NAP025039-001	Pcdhb21	-5.732
A_55_P2007663	ref|NM_026303|ens|ENSMUST00000165105|ens|ENSMUST00000164711|gb|AK054267	Alkbh8	-5.732
A_30_P01017507	Unknown	chr8:119732348-119749198_F	-5.728
A_51_P337771	ref|NM_053142|ens|ENSMUST00000053856|gb|AK077255|gb|AF326310	Pcdhb17	-5.728
A_51_P214796	ref|NM_199196|ref|NM_001163018|ens|ENSMUST00000163272|ens|ENSMUST00000017692	Suz12	-5.728
A_30_P01024834	Unknown	chr9:65647428-65677009_R	-5.728
A_55_P2017677	ref|NM_026056|gb|AK033071|tc|TC1574982|riken|7630403A08	Cap2	-5.724
A_51_P496381	ref|NM_175168|ens|ENSMUST00000044442|gb|AK018379|gb|AB055408	Ptk7	-5.72
A_55_P2023864	ref|NM_026220|ens|ENSMUST00000056732|gb|AK050561|gb|AK088766	Mfap1a	-5.72
A_51_P461779	ref|NM_172994|ens|ENSMUST00000031003|gb|AK032023|gb|BC059811	Ppp2r2c	-5.712
A_55_P2150603	ens|ENSMUST00000103672|gb|U07883|gb|U07662|tc|NP063563	ENSMUST00000103672	-5.696
A_55_P1963184	ref|NM_001163314|ens|ENSMUST00000097739|ref|XM_003084445|ref|XM_003086204	Pgap1	-5.692
A_55_P2075080	ref|NM_001029988|ens|ENSMUST00000068853|ens|ENSMUST00000108864|gb|AK132523	Fat2	-5.692
A_55_P2094352	gb|AK170523|tc|TC1705480|riken|F630106K16	Zfp523	-5.688
A_30_P01019535	Unknown	chr6:126768864-126769326_R	-5.688
A_55_P2092194	ref|NM_028576|gb|AK155246|riken|F630211G03|nap|NAP063428-1	1700106N22Rik	-5.688
A_52_P392216	ref|NM_177259|ens|ENSMUST00000080139|ens|ENSMUST00000166786|ens|ENSMUST00000106830	Dab1	-5.68
A_52_P214891	ref|NM_021433|ens|ENSMUST00000027743|gb|AK198164|gb|AK019106	Stx6	-5.68
A_52_P626756	ref|NM_027296|ref|NM_001242358|ens|ENSMUST00000057578|gb|AK139764	Trnt1	-5.68
A_55_P1997956	Unknown	A_55_P1997956	-5.676
A_51_P368713	ref|NM_026617|ens|ENSMUST00000134203|ens|ENSMUST00000141206|ens|ENSMUST00000020446	Tmbim4	-5.676
A_55_P2075631	ref|NM_011394|ens|ENSMUST00000067786|gb|AK087507|gb|AK182280	Slc20a2	-5.676
A_51_P213928	ref|NM_138742|ens|ENSMUST00000079490|gb|AB010711|gb|AK078521	Nap1l3	-5.673
A_51_P400585	ref|NM_007466|ens|ENSMUST00000028617|gb|U35846|gb|AK212083	Api5	-5.673
A_55_P2061437	ref|NM_025520|ens|ENSMUST00000170382|gb|AK008480|gb|BC048459	Lsm5	-5.669
A_55_P2281624	gb|AK142273|tc|TC1645847|riken|D330027A05	2610034E01Rik	-5.669
A_52_P196105	ref|NM_175274|ens|ENSMUST00000042661|gb|AK052340|gb|AK173233	Ttyh3	-5.665
A_55_P1961645	ref|NM_009503|ens|ENSMUST00000030164|gb|AK030751|gb|AK153249	Vcp	-5.665
A_51_P310821	ref|NM_010453|ens|ENSMUST00000048794|gb|X16840|gb|M36604	Hoxa5	-5.665
A_55_P2009604	ens|ENSMUST00000088356	Gm608	-5.657
A_55_P2005081	ref|NM_052835|ens|ENSMUST00000098432|ens|ENSMUST00000134330|ens|ENSMUST00000076364	Rpl10	-5.657
A_55_P2009861	gb|BB713741	BB713741	-5.653
A_55_P2071751	ens|ENSMUST00000103568|gb|AF012170|gb|X03760|tc|NP050711	ENSMUST00000103568	-5.649
A_55_P1973349	ref|NM_033596|gb|BC051566|tc|TC1591125|nap|NAP017613-001	Hist2h4	-5.649
A_52_P213181	ref|NM_001110142|ref|NM_028288|ens|ENSMUST00000016681|gb|AK164640	Cul4b	-5.645
A_55_P2139625	ref|NM_001039519|ens|ENSMUST00000122087|ens|ENSMUST00000140305|ens|ENSMUST00000133881	Gtf2a2	-5.641
A_51_P277444	ref|NM_013923|ref|NR_033529|ens|ENSMUST00000022890|gb|AK147768	Rnf19a	-5.629
A_51_P249930	ref|NM_146236|gb|BC011290|gb|BC083157|tc|TC1582745	Tceal1	-5.626
A_55_P1992834	ref|NM_007706|ref|NM_001168655|ref|NM_001168656|ref|NM_001168657	Socs2	-5.626
A_52_P220810	ref|NM_144551|ens|ENSMUST00000020922|gb|AK144192|gb|AK082329	Trib2	-5.626
A_30_P01031184	Unknown	chr4:15230638-15231187_F	-5.622
A_55_P1959624	ref|XM_003084636|ref|XM_003086517|gb|AK157913|riken|F930007G17	XM_003084636	-5.618
A_51_P346826	ref|NM_017475|ens|ENSMUST00000155757|ens|ENSMUST00000030399|gb|AK186486	Rragc	-5.618
A_66_P133498	ref|NM_001164677|ref|NM_001164678|ref|NM_011052|ens|ENSMUST00000111853	Pdcd6ip	-5.618
A_51_P280437	ref|NM_133649|ref|NM_133648|ens|ENSMUST00000028549|ens|ENSMUST00000053666	Slc12a6	-5.61
A_55_P2040977	ref|NM_013780|ens|ENSMUST00000101432|gb|AK034372|gb|AK162871	Npas3	-5.61
A_30_P01026536	Unknown	chr1:163508244-163586072_F	-5.61
A_52_P341598	ref|NM_022416|ens|ENSMUST00000094836|gb|AK082468|gb|AK010941	Stk32b	-5.602
A_51_P111259	ref|NM_026373|ens|ENSMUST00000174799|ens|ENSMUST00000025779|ens|ENSMUST00000172914	Cdk2ap2	-5.598
A_51_P363791	ref|NM_018829|gb|AK004740|gb|BC010667|tc|TC1572627	Ap3m1	-5.594
A_52_P140497	ens|ENSMUST00000112512|gb|AK077389|tc|TC1645154|riken|5430416E01	Golga3	-5.587
A_30_P01025234	Unknown	chr5:96591892-96606467_F	-5.587
A_51_P232207	ref|NM_008269|ens|ENSMUST00000173432|ens|ENSMUST00000000704|gb|X56461	Hoxb6	-5.583
A_55_P1989703	ref|NM_144908|ens|ENSMUST00000114952|ens|ENSMUST00000045737|ens|ENSMUST00000114950	Galnt11	-5.579
A_52_P574653	ref|NM_007544|ens|ENSMUST00000004560|ens|ENSMUST00000160684|gb|AK161235	Bid	-5.575
A_51_P282609	ref|NM_146072|ref|NM_010348|gb|X66118|gb|AK043542	Grik1	-5.571
A_52_P59579	ref|NM_026669|ref|NM_001171034|ref|NM_001171035|ref|NM_001171036	Tmbim6	-5.571
A_55_P2010586	ref|XR_001564|ref|XR_001587|gb|AK132285|riken|3830429B21	Gm6252	-5.567
A_51_P152826	ref|NM_025872|ens|ENSMUST00000032372|gb|AK032678|gb|BC085246	Golt1b	-5.567
A_55_P2129836	gb|DQ648020|ens|ENSMUST00000118605	Inpp5f	-5.567
A_55_P1993353	ref|NM_001081263|ens|ENSMUST00000144677|ens|ENSMUST00000089948|gb|AK148718	Slc44a5	-5.564
A_55_P2130144	ref|NM_181074|ens|ENSMUST00000053568|ens|ENSMUST00000114247|gb|AK027262	Lingo1	-5.564
A_30_P01029532	Unknown	chr3:138239464-138241728_R	-5.56
A_52_P404273	ref|NM_144813|ens|ENSMUST00000037798|gb|BC016094|gb|BC044859	Slc24a1	-5.548
A_30_P01030909	Unknown	chr1:35034564-35047457_F	-5.54
A_52_P234729	ref|NM_008861|ens|ENSMUST00000086831|gb|Y13278|gb|AF014010	Pkd2	-5.537
A_52_P6524	ref|NM_001099277|ens|ENSMUST00000108509|ens|ENSMUST00000163604|gb|BC157962	Zfp541	-5.525
A_55_P1975120	ref|XM_003084878|gb|AK172211|gb|AK041588|tc|TC1605034	Gm10777	-5.521
A_51_P215540	ref|NM_011278|ens|ENSMUST00000030992|gb|AK145596|gb|AK019656	Rnf4	-5.521
A_30_P01027188	Unknown	chr9:51905865-51911474_F	-5.521
A_52_P562593	ref|NM_148934|ens|ENSMUST00000020552|gb|AF303106|gb|BC138515	Gm16517	-5.521
A_55_P2013273	Unknown	A_55_P2013273	-5.517
A_30_P01031790	Unknown	chr5:52461266-52541416_R	-5.514
A_55_P2015118	Unknown	A_55_P2015118	-5.514
A_51_P438149	ref|NM_153058|ref|NM_001162941|ref|NM_001162942|ens|ENSMUST00000025127	Mapre2	-5.506
A_30_P01019332	Unknown	chr7:88668435-88674440_F	-5.502
A_55_P1961870	gb|BC025219|tc|TC1755804|tc|TC1639469|tc|TC1579632	BC025219	-5.495
A_52_P586141	ref|NM_001037724|ref|NM_007406|ref|NM_001037723|ref|NM_001109756	Adcy7	-5.495
A_30_P01023188	Unknown	chr11:69185658-69186082_F	-5.487
A_52_P194971	ref|NM_010460|ens|ENSMUST00000049352|gb|X06762|tc|TC1585082	Hoxb7	-5.487
A_55_P2090794	ens|ENSMUST00000117735|tc|TC1697535	Mtus1	-5.487
A_55_P1954501	ref|NM_177664|ens|ENSMUST00000125664|ens|ENSMUST00000061071|gb|BC137702	D3Bwg0562e	-5.483
A_51_P198835	ref|NM_013760|ens|ENSMUST00000015049|gb|AK005475|gb|AB028857	Dnajb9	-5.479
A_66_P104390	ref|NM_019718|ens|ENSMUST00000026009|gb|AK185320|gb|AK192226	Arl3	-5.476
A_30_P01021554	Unknown	chr17:6830756-6832322_R	-5.476
A_55_P1973770	ref|NM_029770|ens|ENSMUST00000105458|ens|ENSMUST00000077925|gb|AK041547	Unc5b	-5.472
A_51_P394471	ref|NM_011548|ref|NM_001164147|ref|NM_001164148|ref|NM_001164149	Tcf3	-5.468
A_51_P496845	ref|NM_007604|ens|ENSMUST00000015877|gb|U16741|gb|AK008204	Capza2	-5.464
A_55_P2145389	ref|NM_001172160|ref|NM_178382|ens|ENSMUST00000110057|gb|AK017456	Flrt3	-5.464
A_51_P352720	ref|NM_053098|ens|ENSMUST00000031694|gb|BC156701|gb|AK147141	Lmod2	-5.464
A_30_P01032063	Unknown	chr3:100363012-100369971_R	-5.46
A_52_P678895	ref|NM_025975|ens|ENSMUST00000033519|gb|AK088277|gb|AK010186	Dynlt3	-5.46
A_30_P01028665	Unknown	chr17:6455677-6476228_F	-5.457
A_55_P2163263	Unknown	A_55_P2163263	-5.457
A_51_P481644	ref|NM_145442|ens|ENSMUST00000021416|gb|AK154318|gb|AK171164	Mbip	-5.453
A_55_P2166506	ref|XM_886369|ref|XM_917300|nap|NAP027003-1	Gm6272	-5.449
A_51_P413539	ref|NM_021606|ref|NM_001159631|ens|ENSMUST00000112902|ens|ENSMUST00000054234	Nek6	-5.449
A_55_P2011551	gb|AK168135|riken|I730060B02	Anapc5	-5.445
A_66_P125777	ref|NM_001199283|ref|NM_001199284|ref|NM_173388|ens|ENSMUST00000100839	Slc43a2	-5.438
A_30_P01027461	Unknown	chr10:56151791-56184966_R	-5.438
A_55_P2099650	ref|NM_053195|ens|ENSMUST00000081121|ens|ENSMUST00000110007|ens|ENSMUST00000137908	Slc24a3	-5.438
A_51_P267740	ref|NM_026934|ens|ENSMUST00000081591|ens|ENSMUST00000134789|gb|AK139511	Zc3h15	-5.438
A_51_P288341	ref|NM_008277|ens|ENSMUST00000155092|ens|ENSMUST00000031398|gb|X59530	Hpd	-5.434
A_55_P2018572	gb|AK163734|tc|TC1636960|riken|B930082A13	Mtmr9	-5.426
A_55_P1953693	ref|NM_008994|ref|NM_001163303|ref|NM_001163302|ref|NM_001163305	Pxmp3	-5.423
A_55_P2170335	ref|NM_007552|ens|ENSMUST00000051929|ens|ENSMUST00000028071|ref|XR_001569	Bmi1	-5.423
A_30_P01020514	Unknown	chr17:39983902-39985688_F	-5.423
A_30_P01023258	Unknown	chr8:13507348-13543773_F	-5.423
A_55_P2022699	tc|TC1709970|nap|NAP031457-1	TC1709970	-5.423
A_55_P2061686	ref|NM_030708|ens|ENSMUST00000081955|ens|ENSMUST00000026284|gb|AB024499	Zfhx4	-5.419
A_30_P01032905	Unknown	chr2:181650800-181669350_F	-5.411
A_51_P289881	ref|NM_025334|ens|ENSMUST00000030296|gb|AK002862|gb|AK003481	Txndc12	-5.411
A_55_P2031125	ref|NM_019949|ens|ENSMUST00000028473|ens|ENSMUST00000102642|gb|AK206200	Ube2l6	-5.408
A_51_P333159	gb|BC019119|gb|AK151590|gb|AK153144|riken|I830031P11	Rpa1	-5.408
A_55_P2096777	ref|NM_175286|ens|ENSMUST00000114336|ens|ENSMUST00000051033|gb|AK171799	Tprn	-5.404
A_55_P2054714	Unknown	A_55_P2054714	-5.404
A_55_P2117146	ref|NM_011119|ens|ENSMUST00000026425|gb|BC037623|gb|BC003777	Pa2g4	-5.4
A_55_P2164040	ref|NM_001170454|ens|ENSMUST00000031097|ens|ENSMUST00000119916|tc|TC1657204	Tada2b	-5.4
A_55_P2145480	Unknown	A_55_P2145480	-5.4
A_55_P2003483	ref|NM_138595|ens|ENSMUST00000070303|ens|ENSMUST00000025778|gb|AK080937	Gldc	-5.396
A_55_P1997105	ref|NM_172670|ref|NM_001166633|ens|ENSMUST00000090582|ens|ENSMUST00000043868	Gyltl1b	-5.396
A_55_P1962707	Unknown	A_55_P1962707	-5.396
A_55_P1985463	Unknown	A_55_P1985463	-5.393
A_55_P2126890	Unknown	A_55_P2126890	-5.393
A_51_P451151	ref|NM_026785|ens|ENSMUST00000088248|gb|AK136186|gb|BC147032	Ube2c	-5.393
A_55_P2030040	ref|NM_007526|ens|ENSMUST00000021813|gb|BC119047|gb|BC119049	Barx1	-5.385
A_55_P2030080	ref|NM_001017426|ens|ENSMUST00000094077|tc|TC1578227	Kdm6b	-5.385
A_55_P1957272	ens|ENSMUST00000099360|gb|AK135228|gb|AK018359|tc|TC1600974	Obfc1	-5.385
A_55_P2016421	Unknown	A_55_P2016421	-5.385
A_51_P405476	ref|NM_010185|ens|ENSMUST00000079957|gb|AK155600|gb|J05020	Fcer1g	-5.385
A_30_P01022594	Unknown	chrX:90997595-91009570_R	-5.381
A_55_P2038046	nap|NAP005004-001	NAP005004-001	-5.378
A_30_P01030549	Unknown	chr8:12278818-12280657_F	-5.378
A_30_P01023033	Unknown	chr17:26911397-26917047_F	-5.37
A_55_P2084646	ref|NM_153409|ref|NM_178634|ens|ENSMUST00000112394|ens|ENSMUST00000112397	Csrnp3	-5.367
A_52_P256817	ref|NM_009577|ens|ENSMUST00000032551|gb|AK146692|gb|AK159077	Zik1	-5.367
A_55_P2133895	ref|NM_019868|ens|ENSMUST00000113202|ens|ENSMUST00000050331|ens|ENSMUST00000074950	Hnrnph2	-5.367
A_55_P2061465	ref|NM_028658|ens|ENSMUST00000038551|gb|AK170254|gb|BC137673	Klraq1	-5.359
A_51_P416669	ref|NM_008473|ens|ENSMUST00000023790|gb|BC117842|gb|BC117843	Krt1	-5.359
A_55_P2099530	nap|NAP093812-001	NAP093812-001	-5.352
A_30_P01020727	Unknown	chr12:82500406-82501102_F	-5.348
A_51_P273508	ref|NM_025985|ens|ENSMUST00000138247|ens|ENSMUST00000021148|gb|BC065083	Ube2g1	-5.344
A_55_P1996702	ref|NM_008174|ens|ENSMUST00000090512|ens|ENSMUST00000115324|gb|AK038395	Grm8	-5.344
A_52_P480402	ref|NM_030235|ens|ENSMUST00000031805|gb|AK147365|gb|AK122228	Avl9	-5.344
A_51_P195100	ref|NM_009190|gb|U10119|gb|AK152131|gb|AK151023	Vps4b	-5.341
A_51_P431316	ref|NM_025773|ens|ENSMUST00000117146|gb|AK077997|gb|AK044463	Ube2w	-5.341
A_30_P01033329	Unknown	chr6:11994002-11997859_F	-5.333
A_30_P01017931	Unknown	chr1:138570107-138632310_F	-5.329
A_55_P2091145	ref|NM_178211|ref|NM_175657|ref|NM_178192|ref|NM_001195421	Hist1h4k	-5.329
A_51_P201773	ref|NM_198031|ens|ENSMUST00000168657|ens|ENSMUST00000000776|ens|ENSMUST00000164774	Tubgcp3	-5.329
A_55_P2177513	ref|NM_144803|ens|ENSMUST00000022620|gb|BC011490|tc|TC1590138	Chrna2	-5.326
A_55_P2160473	Unknown	A_55_P2160473	-5.326
A_30_P01032266	Unknown	chr14:28231577-28242027_F	-5.326
A_55_P2170105	Unknown	A_55_P2170105	-5.322
A_51_P198664	ref|NM_153524|ens|ENSMUST00000087092|gb|AY042194|gb|BC115741	Mrgpra4	-5.322
A_55_P2091368	ref|NM_001081373|ens|ENSMUST00000114628|ens|ENSMUST00000117194|gb|BC076567	Cep164	-5.322
A_52_P425667	ref|NM_009625|ens|ENSMUST00000064775|gb|BC057344|gb|AK142765	Adcyap1	-5.318
A_51_P412966	ref|NM_008516|ens|ENSMUST00000049285|gb|AK161885|gb|AK139355	Lrrn1	-5.315
A_51_P178347	ref|NM_018759|ref|NR_030777|ens|ENSMUST00000136558|ens|ENSMUST00000031227	Zfp326	-5.315
A_51_P123805	ref|NM_001081203|ens|ENSMUST00000065263|gb|AK133096|gb|BC063073	Sbno1	-5.315
A_55_P2171196	Unknown	A_55_P2171196	-5.311
A_66_P126485	ref|NM_026062|ens|ENSMUST00000031198|gb|AK013580|gb|AK038811	Fam69a	-5.311
A_51_P305843	ref|NM_025844|ens|ENSMUST00000001825|gb|AK003259|gb|BC018374	Chordc1	-5.304
A_55_P2113466	Unknown	A_55_P2113466	-5.304
A_55_P2065434	Unknown	A_55_P2065434	-5.304
A_51_P336952	ref|NM_030004|ens|ENSMUST00000022517|gb|AK135834|gb|AK003913	Cryl1	-5.304
A_30_P01019507	Unknown	chr11:97457180-97487074_R	-5.3
A_55_P1966719	Unknown	A_55_P1966719	-5.3
A_55_P1999601	gb|AK135158|riken|6530432O13	Gm10631	-5.296
A_55_P1981584	ref|NM_146607|ens|ENSMUST00000095084|ens|ENSMUST00000172257|gb|BC127971	Olfr270	-5.296
A_55_P2154880	Unknown	A_55_P2154880	-5.296
A_52_P542970	nap|NAP071116-1|nap|NAP018852-001	NAP071116-1	-5.293
A_55_P2127977	Unknown	A_55_P2127977	-5.293
A_52_P585028	ref|NM_029074|ens|ENSMUST00000128290|ens|ENSMUST00000095214|ens|ENSMUST00000127490	Tmem188	-5.293
A_55_P2082529	ref|NM_022028|ens|ENSMUST00000021467|gb|AK034983|gb|AJ292968	Sav1	-5.289
A_55_P2020736	ref|NM_144939|ens|ENSMUST00000138316|ens|ENSMUST00000113296|ens|ENSMUST00000024034	Frs3	-5.285
A_51_P364421	ref|NM_011515|ens|ENSMUST00000051100|gb|AK165299|gb|AK005487	Vamp7	-5.282
A_30_P01032238	Unknown	chr15:100908323-100908645_F	-5.278
A_30_P01024440	Unknown	chr17:3213918-3257944_F	-5.274
A_51_P206251	ref|NM_145542|ens|ENSMUST00000029490|ens|ENSMUST00000138091|gb|AK004088	Ahcyl1	-5.274
A_55_P2133845	ref|NM_001177427|ens|ENSMUST00000094651|gb|AK044722|tc|TC1601378	Eid2b	-5.271
A_52_P565279	ref|NM_144815|ens|ENSMUST00000075303|gb|BC014705|gb|AK140387	Cecr5	-5.267
A_52_P683580	ref|NM_027758|ref|NM_001111304|ens|ENSMUST00000093393|ens|ENSMUST00000168190	Tbc1d9	-5.256
A_51_P117477	ref|NM_011977|ens|ENSMUST00000034267|gb|AK155185|gb|AK040923	Slc27a1	-5.249
A_51_P281700	ref|NM_010613|ens|ENSMUST00000065744|ens|ENSMUST00000007814|gb|AK077415	Khsrp	-5.249
A_30_P01026324	Unknown	chr4:149383134-149451259_R	-5.245
A_55_P2008860	ens|ENSMUST00000132097|gb|AK077358|gb|BB027381|tc|TC1611098	ENSMUST00000132097	-5.245
A_55_P2034853	ref|NM_029816|gb|AK161552|ens|ENSMUST00000105415|tc|TC1647900	2610028H24Rik	-5.242
A_52_P222725	ref|NM_026148|ref|NM_001193303|ref|NM_201242|ens|ENSMUST00000171062	Lims1	-5.242
A_55_P2305010	ref|XR_035383|ref|XR_035181|gb|AK043374|gb|AW456978	A730089K16Rik	-5.242
A_52_P437084	nap|NAP111374-1	NAP111374-1	-5.238
A_55_P2110915	ref|NM_201411|ens|ENSMUST00000113383|gb|AK052737|tc|TC1604762	Flrt1	-5.234
A_55_P2399208	gb|AK172666|riken|F830226J21	4930512B01Rik	-5.231
A_30_P01017564	Unknown	chr3:58118325-58136550_F	-5.231
A_55_P2018941	ref|NM_008031|ens|ENSMUST00000114649|ens|ENSMUST00000114651|ens|ENSMUST00000088546	Fmr1	-5.227
A_51_P341130	ref|NM_016721|ens|ENSMUST00000032751|ens|ENSMUST00000167377|gb|AK154213	Iqgap1	-5.223
A_52_P272534	nap|NAP029999-1|nap|NAP000369-004|nap|NAP092230-001	NAP029999-1	-5.223
A_55_P2150352	Unknown	A_55_P2150352	-5.22
A_66_P121137	ref|NM_177197|ens|ENSMUST00000038598|gb|AK029364|gb|BC099586	Idi2	-5.216
A_51_P461319	ref|NM_025961|ens|ENSMUST00000028624|gb|AK151313|gb|AK007325	Gatm	-5.216
A_52_P426513	ref|NM_019989|ens|ENSMUST00000033598|gb|AK151871|gb|AK151501	Sh3bgrl	-5.209
A_55_P2092884	Unknown	A_55_P2092884	-5.209
A_55_P1992475	Unknown	A_55_P1992475	-5.209
A_55_P2086811	ref|NM_001013817|ens|ENSMUST00000080204|ref|XM_003086942|gb|BC069971	Sp140	-5.205
A_66_P118752	ref|NM_145510|ens|ENSMUST00000047978|gb|AK155054|gb|AK087547	Rabif	-5.202
A_55_P1982543	Unknown	A_55_P1982543	-5.202
A_55_P1957876	nap|NAP112239-1|nap|NAP112321-1|nap|NAP112181-1	NAP112239-1	-5.202
A_55_P2178201	ref|NM_025793|ens|ENSMUST00000106110|ens|ENSMUST00000136797|ens|ENSMUST00000137230	Wdr45l	-5.202
A_55_P2181246	Unknown	A_55_P2181246	-5.198
A_55_P1976224	ref|NM_021273|ens|ENSMUST00000001304|gb|BC106109|gb|BC015271	Ckb	-5.195
A_52_P331762	ref|NM_057173|ens|ENSMUST00000036992|gb|BC053074|tc|TC1581634	Lmo1	-5.191
A_51_P484526	ref|NM_011915|ens|ENSMUST00000145691|ens|ENSMUST00000020439|gb|AK142443	Wif1	-5.187
A_55_P2084338	ref|NM_001081226|ens|ENSMUST00000112025|gb|AK009246|tc|TC1666403	2310009B15Rik	-5.187
A_51_P475076	ref|NM_011692|ens|ENSMUST00000033540|gb|BC132169|gb|BC132171	Vbp1	-5.184
A_51_P203474	ref|NM_021884|ens|ENSMUST00000014546|gb|AK205423|gb|BC085308	Tsg101	-5.184
A_55_P2042456	ref|NM_153786|ens|ENSMUST00000163017|gb|AK048390|gb|AJ578054	Vgll2	-5.18
A_30_P01020547	Unknown	chr2:167388900-167402475_F	-5.18
A_51_P398235	ref|NM_172704|ens|ENSMUST00000062904|gb|BC079852|gb|AK171781	Dnajc11	-5.177
A_55_P1959541	nap|NAP000581-003	NAP000581-003	-5.173
A_52_P7183	ref|NM_027854|ref|NM_001081394|ens|ENSMUST00000065329|gb|BC033455	0610007L01Rik	-5.173
A_55_P2253195	gb|AK015435|riken|4930449M09|nap|NAP023986-001	1700025L06Rik	-5.173
A_52_P451073	ref|NM_178589|ens|ENSMUST00000024708|gb|AK033529|gb|AK043823	Tnfrsf21	-5.169
A_55_P2169529	Unknown	A_55_P2169529	-5.169
A_51_P513032	ref|NM_032000|ens|ENSMUST00000165201|ens|ENSMUST00000079901|gb|AK078617	Trps1	-5.162
A_55_P2162935	ref|NM_008744|ens|ENSMUST00000108674|ens|ENSMUST00000021284|gb|BC029161	Ntn1	-5.159
A_52_P191537	ens|ENSMUST00000001079|gb|AK089573|gb|BY569966|riken|F830002H18	Sec24b	-5.155
A_55_P2102693	ref|NM_001110204|ref|NM_007394|ref|NM_001110205|ens|ENSMUST00000056376	Acvr1	-5.152
A_52_P404005	ens|ENSMUST00000093326|nap|NAP103078-1	ENSMUST00000093326	-5.152
A_65_P07627	ref|NM_007826|ref|NM_001038610|ens|ENSMUST00000071533|ens|ENSMUST00000069334	Dach1	-5.152
A_55_P1977761	ref|NM_025978|ref|NM_027619|ens|ENSMUST00000099153|gb|AK081238	Ttc14	-5.148
A_30_P01029790	Unknown	chr16:30200995-30205965_R	-5.148
A_55_P1999818	Unknown	A_55_P1999818	-5.148
A_30_P01027400	Unknown	chr12:110842154-110883594_F	-5.141
A_55_P2124461	gb|BC057675|gb|BC016227|gb|BC037157|gb|AK144717	BC057675	-5.141
A_55_P2098200	ref|NM_011627|ref|NM_001164792|ens|ENSMUST00000006559|ens|ENSMUST00000098500	Tpbg	-5.134
A_55_P1981040	ref|NM_001110826|ref|NM_181324|ref|NM_007841|ens|ENSMUST00000098836	Ddx6	-5.127
A_55_P2162537	ens|ENSMUST00000140883|gb|AK053586|gb|AK141896|gb|BC061122	Ing4	-5.123
A_51_P317317	ref|NM_172116|ens|ENSMUST00000127556|ens|ENSMUST00000106008|ens|ENSMUST00000140337	Pddc1	-5.123
A_51_P448946	ref|NM_021372|ref|NM_001038625|ens|ENSMUST00000109585|ens|ENSMUST00000093292	Sertad2	-5.119
A_51_P416439	ref|NM_001033573|ref|NM_025883|ens|ENSMUST00000076891|gb|AK211742	Zdhhc6	-5.119
A_51_P261107	ref|NM_139144|ens|ENSMUST00000044475|gb|AK045910|gb|AK075653	Ogt	-5.112
A_55_P2019934	ref|NM_172677|ref|NM_001145919|ref|NR_027375|ens|ENSMUST00000108346	Ythdf3	-5.112
A_55_P2030702	Unknown	A_55_P2030702	-5.112
A_51_P342031	ref|NM_011746|ens|ENSMUST00000094340|gb|AK134870|gb|BC054771	Mkrn3	-5.112
A_52_P422859	ref|NM_008305|ens|ENSMUST00000168109|ens|ENSMUST00000171332|ens|ENSMUST00000097839	Hspg2	-5.109
A_30_P01022603	Unknown	chr17:56687541-56694616_F	-5.102
A_55_P2108690	ref|NR_033633|ens|ENSMUST00000095717|ens|ENSMUST00000095723|ens|ENSMUST00000076317	Gm8709	-5.102
A_55_P1972018	ref|NM_178208|ref|NM_178192|ref|NM_175655|ens|ENSMUST00000102967	Hist1h4c	-5.098
A_66_P118165	nap|NAP112345-1	NAP112345-1	-5.098
A_52_P584293	ref|NM_181415|ens|ENSMUST00000077282|ens|ENSMUST00000086783|gb|AK147492	Atrnl1	-5.095
A_55_P2075213	ref|NM_029116|ens|ENSMUST00000069399|gb|AK019339|tc|TC1604328	Kbtbd11	-5.088
A_65_P09177	ref|NM_052973|ref|NM_001172098|ens|ENSMUST00000013130|ens|ENSMUST00000171674	Strn3	-5.084
A_52_P615952	ref|NM_001159517|ens|ENSMUST00000097414|gb|AF090402|gb|AK161210	Qk	-5.084
A_55_P1996212	ref|NM_001033466|ens|ENSMUST00000100078|gb|AK132308|gb|AK173184	Zbtb2	-5.084
A_55_P1982454	ref|NM_007945|ens|ENSMUST00000100841|ens|ENSMUST00000111878|ens|ENSMUST00000130274	Eps8	-5.077
A_55_P2163541	ref|NM_177872|ref|NM_001081401|ens|ENSMUST00000163159|ens|ENSMUST00000061427	Adamts3	-5.077
A_55_P1960298	ref|NM_027797|ref|NM_001141950|ens|ENSMUST00000071001|ens|ENSMUST00000026578	Tmem80	-5.077
A_55_P2130129	ref|NM_010597|ens|ENSMUST00000049230|gb|AK004666|gb|AK153200	Kcnab1	-5.074
A_51_P374772	ref|NM_001102430|ens|ENSMUST00000088615|gb|AK035885|gb|BC025221	Arfgef1	-5.074
A_51_P320357	ref|NM_008171|ens|ENSMUST00000111905|tc|TC1655752	Grin2b	-5.07
A_55_P1959628	ref|NM_001110152|ref|NM_001199902|ref|NM_001013369|ens|ENSMUST00000075087	Pfdn4	-5.07
A_55_P1968778	ref|NM_145452|ens|ENSMUST00000109552|ens|ENSMUST00000022034|gb|BC065082	Rasa1	-5.067
A_65_P00930	ref|NM_001039195|gb|AK043490|gb|AK014389|gb|AK046861	Gria2	-5.067
A_55_P2056483	ref|NM_011079|ens|ENSMUST00000026617|gb|J03293|gb|BC055102	Phkg1	-5.063
A_55_P2138222	ref|XM_001479030|ref|XM_983418|tc|TC1728361	Gm8066	-5.056
A_55_P2072193	ref|NR_026976|gb|AK081581|riken|C130046P11|nap|NAP084154-1	6720401G13Rik	-5.056
A_30_P01017721	Unknown	chr14:44284425-44300475_F	-5.056
A_52_P465121	gb|AK156588|gb|AK166219|riken|F830031M18|riken|G830017C06	1500003O03Rik	-5.056
A_55_P2157159	Unknown	A_55_P2157159	-5.053
A_51_P295442	ref|NM_021605|ens|ENSMUST00000027642|gb|AK088173|gb|AF217650	Nek7	-5.049
A_55_P1992084	ref|NM_008981|ens|ENSMUST00000022264|gb|AK134814|gb|BB354907	Ptprg	-5.049
A_30_P01021211	Unknown	chr5:121778090-121779622_F	-5.049
A_55_P2243431	ref|NR_045032|gb|BC052902|gb|Y17860|tc|TC1585633	Gdap10	-5.046
A_55_P2008898	Unknown	A_55_P2008898	-5.042
A_55_P1977776	ref|NR_003280|gb|J01871	LOC790956	-5.042
A_51_P446583	ref|NM_173364|gb|AK036132|gb|BC099930|gb|BC027167	Zfp445	-5.042
A_55_P1963489	nap|NAP017482-001	NAP017482-001	-5.039
A_30_P01032117	Unknown	chr12:106115442-106115760_R	-5.039
A_55_P2051414	ref|NM_009465|ref|NM_001190974|ref|NM_001190975|ens|ENSMUST00000163542	Axl	-5.035
A_55_P2177755	ref|NM_013812|ens|ENSMUST00000031341|ens|ENSMUST00000161192|gb|BC152370	Cdk2ap1	-5.035
A_52_P637353	ref|NM_027947|ref|NM_001025594|ens|ENSMUST00000028125|ens|ENSMUST00000095035	Zbtb43	-5.035
A_55_P2050192	ens|ENSMUST00000082418|gb|AK142726|gb|AK137271|gb|AK142572	ND5	-5.032
A_51_P196590	ref|NM_008212|ens|ENSMUST00000029610|gb|AK075609|gb|AK169261	Hadh	-5.032
A_51_P228276	ref|NM_008095|ens|ENSMUST00000124342|ens|ENSMUST00000086046|gb|BC055893	Gbas	-5.025
A_55_P1983508	ref|NM_013613|ref|NM_001139509|ens|ENSMUST00000028166|ens|ENSMUST00000112629	Nr4a2	-5.025
A_51_P375771	ref|NM_001093750|ens|ENSMUST00000038665|gb|AK036111|gb|BC116312	Ptchd1	-5.018
A_52_P456077	ref|NM_175095|ens|ENSMUST00000041954|ens|ENSMUST00000160959|gb|AK004536	Commd2	-5.018
A_55_P2112617	ref|NM_008540|ens|ENSMUST00000114939|ens|ENSMUST00000025393|gb|AY493561	Smad4	-5.018
A_55_P2185652	ref|NM_001146311|ref|NM_009907|ens|ENSMUST00000124177|ens|ENSMUST00000138285	Cln3	-5.014
A_55_P2186540	Unknown	A_55_P2186540	-5.011
A_55_P2348799	ref|NM_197990|ens|ENSMUST00000044581|gb|BC022177|tc|TC1589692	1700025G04Rik	-5.011
A_51_P245895	ref|NM_172632|ens|ENSMUST00000162863|ens|ENSMUST00000091851|gb|AK079654	Mapk4	-5.007
A_52_P409731	ref|NM_020270|ens|ENSMUST00000046587|gb|BC018613|gb|BE652730	Scamp5	-5.007
A_55_P2083063	ref|NM_026735|ens|ENSMUST00000006424|gb|AK077320|tc|TC1581736	Mob1b	-5.004
A_52_P502141	ref|NM_172637|ref|NM_001163471|ens|ENSMUST00000139215|ens|ENSMUST00000169036	Hectd2	-5.004
A_52_P514306	ref|NM_170756|ens|ENSMUST00000057627|gb|AK171852|gb|AK122364	Spata2	-5.004
A_55_P1997282	ref|NM_026604|ens|ENSMUST00000027337|ens|ENSMUST00000097806|gb|AK087116	Fam135a	-5
A_55_P2089158	nap|NAP111376-1	NAP111376-1	-4.993
A_30_P01031385	Unknown	chr5:74487385-74497428_F	-4.993
A_55_P2066484	ref|NM_173863|ens|ENSMUST00000122255|gb|AK144840|gb|AK135654	Crtc3	-4.993
A_52_P682745	ref|NM_172803|ens|ENSMUST00000037488|ens|ENSMUST00000164419|gb|BC051125	Dock4	-4.99
A_55_P2061804	Unknown	A_55_P2061804	-4.99
A_52_P324767	ref|NM_001033475|ens|ENSMUST00000037418|gb|AK147378|gb|AK018286	Tmed8	-4.986
A_55_P2069468	ref|NM_027588|ens|ENSMUST00000147323|ens|ENSMUST00000002456|ens|ENSMUST00000118657	Nt5c1b	-4.983
A_52_P91235	ref|NM_017367|ens|ENSMUST00000058550|gb|AK152614|gb|AK079476	Ccni	-4.979
A_30_P01026228	Unknown	chr12:111824094-111838478_F	-4.979
A_52_P296632	nap|NAP092468-001	NAP092468-001	-4.979
A_30_P01031751	Unknown	chr12:3407353-3426580_R	-4.979
A_30_P01029358	Unknown	chr4:136856064-136877219_R	-4.979
A_51_P250123	ref|NM_028543|ens|ENSMUST00000167539|ens|ENSMUST00000087654|gb|AK088750	Zfp763	-4.979
A_55_P1988899	ref|NM_028372|ens|ENSMUST00000057598	Mblac2	-4.976
A_55_P2139407	ref|NM_023402|ens|ENSMUST00000038446|gb|BC131927|gb|BC131925	Myl12b	-4.976
A_30_P01028040	Unknown	chr3:146629425-146649125_F	-4.973
A_55_P2052685	ref|NM_013764|ref|NM_001162521|ens|ENSMUST00000145455|ens|ENSMUST00000014698	Dguok	-4.973
A_52_P164161	ref|NM_020010|ens|ENSMUST00000001507|gb|AK031059|gb|AK028815	Cyp51	-4.969
A_51_P393305	ref|NM_198034|ref|NM_001159419|ens|ENSMUST00000136381|ens|ENSMUST00000127567	Sidt1	-4.962
A_55_P2067976	ref|NM_001122992|ref|NM_020273|ens|ENSMUST00000105964|ens|ENSMUST00000030733	Gmeb1	-4.962
A_52_P525183	ref|NM_134188|ens|ENSMUST00000021649|gb|AK141651|gb|BC064469	Acot2	-4.959
A_30_P01017625	Unknown	chr7:111526943-111545093_F	-4.955
A_66_P101664	ref|NM_178778|ens|ENSMUST00000038874|gb|AK142499|riken|D530048H07	Scai	-4.949
A_55_P1994957	ref|XR_107483|ref|XR_107484|ref|XR_107482|nap|NAP111752-1	LOC100503168	-4.949
A_30_P01026470	Unknown	chr16:43635730-43639104_F	-4.949
A_51_P435251	ref|NM_146207|ens|ENSMUST00000016680|ens|ENSMUST00000125646|gb|AK005426	Cul4a	-4.949
A_55_P2107362	ref|NM_008122|ref|NM_001159382|ref|NM_001159383|ens|ENSMUST00000107075	Gjc1	-4.949
A_66_P136259	ref|NM_025717|ens|ENSMUST00000036744|gb|AK142116|gb|BC019488	Rbm4b	-4.949
A_30_P01033072	Unknown	chr5:124694137-124695689_R	-4.949
A_52_P109403	ref|NM_001024806|ens|ENSMUST00000024885|gb|BC160197|gb|U19892	Cebpz	-4.945
A_55_P2154450	ref|NM_173393|ens|ENSMUST00000037659|gb|BC024502|gb|AY534252	Xkr6	-4.945
A_52_P178866	ref|NM_001024707|ens|ENSMUST00000122409|ens|ENSMUST00000155404|gb|BC094349	Lrp3	-4.938
A_51_P493886	ref|NM_173866|ens|ENSMUST00000034136|gb|AK082030|gb|AK076250	Gpt2	-4.938
A_52_P592951	ref|NM_025509|ens|ENSMUST00000043937|gb|AK013011|gb|AK009237	Ostc	-4.938
A_55_P1990038	ref|NM_007928|ref|NM_001080389|ref|NM_001080388|ref|NM_001080390	Mark2	-4.931
A_55_P2030046	ref|NM_013800|ens|ENSMUST00000116615|gb|BC012684|gb|L77900	Barx2	-4.931
A_55_P2164805	Unknown	A_55_P2164805	-4.928
A_51_P206655	ref|NM_026032|ens|ENSMUST00000038421|gb|AK012814|gb|AK006006	Lsm1	-4.925
A_52_P227937	ens|ENSMUST00000050584|gb|BC028765|gb|AK167679|gb|AK003470	0610010O12Rik	-4.925
A_51_P241074	ref|NM_008927|ens|ENSMUST00000005066|gb|AB041567|gb|AK154793	Map2k1	-4.921
A_51_P329966	ref|NM_138594|ens|ENSMUST00000032497|gb|AK019434|gb|AK137201	D6Wsu163e	-4.914
A_52_P164136	ref|NM_001042591|ens|ENSMUST00000099356|ens|ENSMUST00000159690|gb|AK122499	Arrdc3	-4.914
A_52_P37681	ref|NM_012056|ens|ENSMUST00000031795|gb|AK007499|gb|BC026133	Fkbp9	-4.911
A_55_P2064492	ref|NM_153594|ens|ENSMUST00000029116|gb|AK146080|gb|AK088800	Pcmtd2	-4.908
A_51_P121607	ref|NR_038051|gb|AK019744|tc|TC1596176|riken|4930546C10	4930546C10Rik	-4.908
A_51_P267494	ref|NM_026514|ens|ENSMUST00000068958|gb|AK019447|gb|AK014281	Cdc42ep3	-4.904
A_55_P1988246	nap|NAP113539-1	NAP113539-1	-4.904
A_52_P644354	ref|NM_011743|ens|ENSMUST00000055241|gb|AK029313|tc|TC1626505	Zfp106	-4.904
A_55_P1962289	gb|AK170517|tc|TC1615033|riken|F630106H11	AK170517	-4.901
A_55_P2004071	ref|NM_009459|ref|NM_001169576|ref|NM_001169577|ens|ENSMUST00000166795	Ube2h	-4.897
A_51_P318830	ref|NM_018803|ens|ENSMUST00000029441|gb|BC125634|gb|BC125632	Syt10	-4.894
A_55_P2050932	ref|NM_133211|ens|ENSMUST00000060719|ens|ENSMUST00000112161|gb|AK036549	Tlr7	-4.894
A_55_P2303717	gb|CD775100|tc|TC1610407	AW413774	-4.894
A_51_P439612	ref|NM_020266|ref|NM_001159883|ref|NM_178055|ref|NM_001159885	Dnajb2	-4.894
A_30_P01032760	Unknown	chr4:126710640-126721240_F	-4.887
A_52_P133578	ref|NM_001004761|ens|ENSMUST00000055946|gb|AB093287|tc|TC1618762	Gpr158	-4.887
A_52_P351669	ref|NM_027375|ens|ENSMUST00000162965|ens|ENSMUST00000057659|gb|BC145495	Gcc2	-4.884
A_52_P622442	ref|NM_026850|ens|ENSMUST00000027247|gb|AK168509|gb|AK004334	Pdcl3	-4.884
A_30_P01032224	Unknown	chr8:123571640-123607481_F	-4.88
A_51_P187018	ref|NM_025564|ens|ENSMUST00000172883|ens|ENSMUST00000174488|ens|ENSMUST00000165121	Magohb	-4.877
A_52_P600318	ref|NM_022813|ens|ENSMUST00000045791|gb|AK161002|gb|AK171766	Scamp2	-4.877
A_55_P2037957	nap|NAP096498-001	NAP096498-001	-4.874
A_52_P49042	ref|NM_001033258|ens|ENSMUST00000019999|gb|AK122475|gb|AK147679	D10Bwg1379e	-4.87
A_30_P01031343	Unknown	chr17:3198868-3394643_F	-4.87
A_51_P360880	ref|NM_001082485|ref|NM_001135019|ens|ENSMUST00000174462|gb|AK088432	Zfp266	-4.867
A_66_P140949	ens|ENSMUST00000170434|nap|NAP121332-001	ENSMUST00000170434	-4.864
A_52_P462125	ref|NR_002888|ref|NR_030771|ens|ENSMUST00000171805|ens|ENSMUST00000084161	Smarca5-ps	-4.864
A_55_P2175877	ref|NM_001013412|ens|ENSMUST00000094226|gb|AY587128|gb|BC148586	Ccl26	-4.86
A_30_P01024670	Unknown	chr1:82895400-82897576_F	-4.86
A_52_P220229	ref|NM_145516|ens|ENSMUST00000027297|gb|AF189817|gb|AK039771	Plekhb2	-4.86
A_52_P590535	ref|NM_007992|ref|NM_001081437|ens|ENSMUST00000137029|ens|ENSMUST00000113498	Fbln2	-4.86
A_52_P630632	ref|NM_134083|ref|NM_001170694|ref|NR_033185|ens|ENSMUST00000164298	Rcbtb2	-4.86
A_52_P157274	ref|NM_001077190|ref|NM_145994|ref|NM_007380|ref|NM_001077192	Abi1	-4.857
A_52_P649724	ref|NM_027188|ens|ENSMUST00000131684|ens|ENSMUST00000068437|gb|AK044168	Smyd3	-4.857
A_51_P386562	ref|NM_010095|ens|ENSMUST00000022637|gb|AK053013|gb|U92703	Ebf2	-4.857
A_55_P2427900	ref|NM_001081153|ens|ENSMUST00000075245|gb|AK005367|tc|TC1646721	Unc13c	-4.853
A_52_P570820	ref|NM_172378|ens|ENSMUST00000110196|ens|ENSMUST00000022995|gb|AB520670	Slc22a22	-4.853
A_51_P433769	ref|NM_144838|ens|ENSMUST00000044385|gb|AK197961|gb|AK049820	Sgtb	-4.85
A_51_P501922	ref|NM_008881|ens|ENSMUST00000163139|gb|D86948|gb|AK154544	Plxna1	-4.85
A_55_P2409570	gb|AK042182|tc|TC1599886|riken|A630067L13	Luc7l2	-4.847
A_55_P2165854	ref|NM_027189|ens|ENSMUST00000117222|ens|ENSMUST00000119912|ens|ENSMUST00000122055	Gemin7	-4.843
A_52_P612803	ref|NM_009831|ens|ENSMUST00000020576|gb|AK147026|gb|AK159831	Ccng1	-4.843
A_55_P2040988	Unknown	A_55_P2040988	-4.843
A_55_P2130660	ref|NM_178740|ens|ENSMUST00000114679|gb|AK047626|gb|AK032263	Slitrk4	-4.843
A_55_P2029612	ref|NM_145742|ens|ENSMUST00000145692|ens|ENSMUST00000029186|gb|AK156955	Dhx35	-4.837
A_51_P517381	ref|NM_029789|ens|ENSMUST00000015858|gb|AK002626|gb|AK159325	Lass2	-4.837
A_55_P1972496	tc|TC1704111|nap|NAP062625-1	TC1704111	-4.837
A_55_P1990309	ref|NM_010488|ref|NM_001163399|ref|NM_001038698|ref|NM_001163397	Elavl4	-4.837
A_51_P236324	ref|NM_028812|ens|ENSMUST00000167451|ens|ENSMUST00000023525|gb|AK080478	Gtf2e1	-4.833
A_55_P2118103	ref|NM_013844|ref|NM_001163797|ref|NM_001044747|ens|ENSMUST00000110905	Zfp68	-4.833
A_52_P127024	ref|NM_175091|ens|ENSMUST00000033929|gb|AK082414|tc|TC1604272	Tnks	-4.833
A_55_P2014978	ref|NM_007889|ens|ENSMUST00000003318|gb|BC148469|gb|BC153065	Dvl3	-4.83
A_55_P2036942	ref|NM_021329|ens|ENSMUST00000108669|ens|ENSMUST00000144271|ens|ENSMUST00000143444	Rangrf	-4.827
A_66_P122155	ref|NM_145514|ens|ENSMUST00000159698|ens|ENSMUST00000159673|ens|ENSMUST00000036329	Wdr26	-4.827
A_52_P410636	ref|NM_011642|ref|NM_001126330|ref|NM_001126331|ens|ENSMUST00000097762	Trp73	-4.823
A_51_P500661	ref|NM_183204|ens|ENSMUST00000059986|gb|AK083175|gb|BC089488	Rnf182	-4.823
A_55_P2032890	ref|NM_001177504|ens|ENSMUST00000100882|gb|AK133454|riken|4933439B04	Gm6588	-4.823
A_55_P2072906	gb|NM_001177391	Gm6788	-4.82
A_30_P01021541	Unknown	chr15:61984389-62102500_R	-4.82
A_55_P2061737	ref|NM_021278|ens|ENSMUST00000112176|ens|ENSMUST00000112172|gb|AK169108	Tmsb4x	-4.817
A_51_P118188	ref|NM_207222|ens|ENSMUST00000067437|gb|AK034177|ens|ENSMUST00000163065	Lmo3	-4.817
A_52_P211949	ref|NM_011286|ens|ENSMUST00000079204|gb|AK013478|gb|BC042585	Rph3a	-4.817
A_51_P382369	ref|NM_175751|ens|ENSMUST00000064763|gb|AK077030|gb|BC151073	Zfp608	-4.817
A_51_P428086	ref|NM_009260|ens|ENSMUST00000102838|gb|AF017112|gb|AK161119	Spnb2	-4.813
A_55_P2155062	ref|NM_027643|ens|ENSMUST00000025675|gb|AK162625|gb|AK033510	Naa40	-4.813
A_30_P01028637	Unknown	chr8:119090566-119097735_R	-4.813
A_51_P185247	ref|NM_145741|ens|ENSMUST00000168727|gb|L42114|gb|S82648	Gdf10	-4.81
A_51_P465740	ref|NM_175215|ref|NM_001191051|ens|ENSMUST00000058771|gb|AK172203	Lysmd4	-4.807
A_55_P1983011	ref|NM_001193266|ref|NM_207010|ens|ENSMUST00000101379|ens|ENSMUST00000037181	Mdga2	-4.807
A_30_P01028660	Unknown	chr4:98943050-98959998_F	-4.807
A_66_P123824	ens|ENSMUST00000060989|gb|AK162665|gb|AK013519|gb|AK029071	Sorl1	-4.803
A_52_P213889	ref|NM_172476|ens|ENSMUST00000044195|gb|AK083189|gb|BC105966	Tmc7	-4.803
A_55_P2104769	ref|NM_009482|ens|ENSMUST00000054778|ens|ENSMUST00000168457|gb|AK010280	Utf1	-4.803
A_55_P1977096	ref|NM_007923|tc|TC1602385	Elk4	-4.8
A_30_P01027119	Unknown	chr2:158169020-158191295_R	-4.797
A_51_P229599	ref|NM_029250|ens|ENSMUST00000032413|gb|AK044502|gb|AK033268	Etnk1	-4.797
A_55_P2052881	Unknown	A_55_P2052881	-4.79
A_55_P1979873	ref|NM_028806|ref|NM_001177789|ref|NM_001177790|ref|NM_001177791	Phactr3	-4.79
A_55_P2086885	ref|NM_001033219|ref|NM_001168255|ens|ENSMUST00000054266|ens|ENSMUST00000076224	Slc45a4	-4.783
A_51_P471273	ref|NR_045177|ens|ENSMUST00000096572|gb|AK013700|gb|XM_003085224	2900055J20Rik	-4.78
A_52_P192307	ref|NM_021326|ref|NM_001045482|ens|ENSMUST00000049861|ens|ENSMUST00000166382	Rbak	-4.777
A_30_P01031329	Unknown	chr7:67111261-67120697_F	-4.777
A_30_P01020413	Unknown	chr6:112552041-112560067_F	-4.773
A_55_P2074488	ref|NM_015800|ens|ENSMUST00000112498|gb|BC100348|gb|AF168680	Crim1	-4.767
A_55_P1989321	ref|NM_009121|ens|ENSMUST00000150046|ens|ENSMUST00000138944|ens|ENSMUST00000134855	Sat1	-4.767
A_51_P158210	ref|NM_008564|ens|ENSMUST00000058011|gb|D86725|gb|AK088156	Mcm2	-4.763
A_51_P271665	ref|NM_011264|ens|ENSMUST00000131186|ens|ENSMUST00000164763|ens|ENSMUST00000139803	Rev3l	-4.76
A_55_P1955479	nap|NAP063195-1	NAP063195-1	-4.757
A_55_P2047809	ref|NM_175692|ens|ENSMUST00000059573|ens|ENSMUST00000138307|ens|ENSMUST00000149303	Snhg11	-4.757
A_66_P128839	ens|ENSMUST00000149014|ref|XR_104641|ref|XR_107335|gb|AK085384	ENSMUST00000149014	-4.757
A_55_P1975041	ref|NM_001003912|ens|ENSMUST00000090982|ens|ENSMUST00000039476|ens|ENSMUST00000152006	Arhgef11	-4.757
A_55_P2113061	Unknown	A_55_P2113061	-4.754
A_51_P465292	ref|NM_080462|ens|ENSMUST00000114498|ens|ENSMUST00000051416|gb|BC033928	Hnmt	-4.754
A_30_P01025465	Unknown	chr2:32950586-32984936_F	-4.754
A_30_P01021497	Unknown	chr10:9322308-9332183_F	-4.75
A_52_P173703	ref|NM_144557|ens|ENSMUST00000048121|gb|AK083225|tc|TC1583663	Myrip	-4.75
A_52_P552832	ref|NM_010886|ens|ENSMUST00000031637|gb|AK076036|gb|AK154084	Ndufa4	-4.747
A_51_P423008	ref|NM_026448|ref|NM_001161800|ens|ENSMUST00000030841|ens|ENSMUST00000168745	Klhl7	-4.747
A_55_P2048036	ref|NM_001044386|ref|NM_011768|ens|ENSMUST00000113927|ens|ENSMUST00000113926	Zfx	-4.744
A_55_P1960157	ref|NM_007532|ref|NM_001024468|ens|ENSMUST00000111742|ens|ENSMUST00000032402	Bcat1	-4.744
A_30_P01024402	Unknown	chr3:88323145-88335770_R	-4.744
A_55_P1994289	gb|AK166404|gb|AK082307|gb|XM_003085113|tc|TC1622857	Gm10791	-4.744
A_52_P38908	ref|NM_001190352|tc|TC1661387|nap|NAP035425-1	Tmem132b	-4.737
A_52_P245766	nap|NAP103766-1|nap|NAP115316-1|nap|NAP113449-1	NAP103766-1	-4.737
A_55_P1993365	Unknown	A_55_P1993365	-4.737
A_51_P115005	ref|NM_010104|ens|ENSMUST00000021796|gb|AK040778|gb|AK153437	Edn1	-4.734
A_55_P2078940	ref|NM_198326|ens|ENSMUST00000028949|ens|ENSMUST00000089140|ens|ENSMUST00000103160	Nsfl1c	-4.734
A_30_P01020571	Unknown	chr2:48826955-48827592_F	-4.734
A_55_P2125623	Unknown	A_55_P2125623	-4.727
A_55_P2002093	ref|NM_026044|ens|ENSMUST00000028351|ens|ENSMUST00000126909|ens|ENSMUST00000146382	Wdr85	-4.727
A_52_P554703	ref|NM_183183|ens|ENSMUST00000051065|gb|AK050148|tc|TC1587065	Gprin3	-4.727
A_51_P217047	ref|NM_025277|ens|ENSMUST00000041160|ens|ENSMUST00000126507|gb|AK014158	Gng10	-4.727
A_52_P685511	gb|AK014656|tc|TC1639023|tc|TC1603515|riken|4833405L11	4833405L11Rik	-4.727
A_51_P149373	ref|NM_028149|ens|ENSMUST00000103143|ens|ENSMUST00000075071|gb|AK028535	Fbxl20	-4.724
A_51_P443364	ref|NM_134048|ref|NM_001253847|ref|NM_001253848|ens|ENSMUST00000064240	Cbll1	-4.721
A_51_P289697	ref|NM_011849|ens|ENSMUST00000050171|gb|AF099067|gb|BC057939	Nek4	-4.721
A_51_P189959	ref|NM_133985|ref|NR_045693|ens|ENSMUST00000040853|gb|AK031790	Oxsr1	-4.721
A_55_P1999078	Unknown	A_55_P1999078	-4.721
A_55_P1990299	ref|NM_052976|gb|AK036038|tc|TC1578966|riken|9630028P19	Ophn1	-4.721
A_51_P280446	ref|NM_022324|ens|ENSMUST00000023453|gb|AB043006|gb|BC023290	Sdf2l1	-4.717
A_55_P2123902	ref|NM_178777|ens|ENSMUST00000066187|gb|AK031747|gb|AK082728	Nhlh2	-4.714
A_66_P136228	ref|NM_030690|ref|NM_001166408|ens|ENSMUST00000090339|ens|ENSMUST00000169385	Rai14	-4.714
A_30_P01023072	Unknown	chr15:68161768-68193518_R	-4.714
A_55_P1994027	ref|NM_009633|ens|ENSMUST00000104934|ens|ENSMUST00000071902|gb|BC055783	Adra2b	-4.711
A_51_P383270	ref|NM_175473|ens|ENSMUST00000036019|gb|AK053608|gb|AK030687	Fras1	-4.711
A_55_P2313658	gb|BG066537	BG066537	-4.711
A_30_P01029962	Unknown	chr4:140841206-140841639_F	-4.711
A_30_P01030384	Unknown	chr8:125031410-125075960_F	-4.708
A_55_P2016924	ref|NM_001144855|ens|ENSMUST00000027729|ens|ENSMUST00000168515|gb|EU568872	Ppfia4	-4.704
A_52_P348720	ref|NM_028493|ens|ENSMUST00000022078|gb|AK164957|gb|AK011650	Rhobtb3	-4.704
A_55_P2030209	ref|NM_025854|ens|ENSMUST00000058615|gb|AK006260|tc|TC1767698	Cir1	-4.698
A_55_P1968108	Unknown	A_55_P1968108	-4.695
A_55_P2104689	ens|ENSMUST00000167475|gb|AJ409496|gb|AJ409497|ens|ENSMUST00000164797	ENSMUST00000167475	-4.695
A_55_P2055217	Unknown	A_55_P2055217	-4.695
A_66_P114528	ref|NM_198632|ens|ENSMUST00000041106|ens|ENSMUST00000167588|gb|BC094596	Trim67	-4.691
A_51_P498257	gb|BC096563|tc|TC1658505|nap|NAP031744-1	Rnf141	-4.691
A_55_P2032538	ref|NM_011055|nap|NAP098058-001	Pde3b	-4.688
A_30_P01017750	Unknown	chr7:67111261-67120697_R	-4.688
A_55_P2016356	ref|NM_133916|ens|ENSMUST00000100507|ens|ENSMUST00000075771|gb|AK033722	Eif3b	-4.688
A_30_P01020887	Unknown	chr16:40267386-40268181_F	-4.688
A_55_P2045127	Unknown	A_55_P2045127	-4.685
A_30_P01027193	Unknown	chr3:36299456-36299851_F	-4.685
A_55_P2049757	nap|NAP112865-1	NAP112865-1	-4.685
A_51_P450888	ref|NM_022982|ens|ENSMUST00000059589|gb|AF283462|gb|BC052317	Rtn4r	-4.685
A_66_P118592	ref|NM_009530|ens|ENSMUST00000113573|tc|TC1606553|riken|2610016O11	Atrx	-4.682
A_30_P01026201	Unknown	chrX:138969489-138969953_R	-4.682
A_55_P2013823	ref|NM_016922|ref|NM_001177703|ref|NM_001177691|ens|ENSMUST00000078757	Gal3st1	-4.682
A_55_P1965846	ref|NM_030220|ref|NM_001080964|ens|ENSMUST00000107626|ens|ENSMUST00000107624	Sp2	-4.678
A_52_P329314	gb|AK089904|tc|TC1588235|riken|F830048I15|nap|NAP023037-001	AK089904	-4.675
A_51_P182131	ref|NM_001033304|ens|ENSMUST00000048012|gb|AK017241|gb|AK173149	5330417C22Rik	-4.672
A_51_P138790	ref|NM_175175|ens|ENSMUST00000054776|gb|AK141254|gb|BC016134	Plekhf2	-4.672
A_51_P189722	ref|NM_172549|ens|ENSMUST00000165726|ens|ENSMUST00000170044|ens|ENSMUST00000001712	Cabin1	-4.669
A_55_P1995297	ens|ENSMUST00000127554|gb|BC137827|gb|AK032684|gb|NM_198633	ENSMUST00000127554	-4.669
A_30_P01028336	Unknown	chr1:138528250-138538250_R	-4.665
A_52_P537852	ref|NM_024203|ref|NR_033586|ens|ENSMUST00000055352|gb|BC066088	Fam120b	-4.665
A_65_P14951	ref|NM_001033238|ens|ENSMUST00000114471|gb|AK147367|gb|AK164519	Cblb	-4.665
A_52_P142208	ref|NM_023423|ref|NR_033619|gb|AK006378|gb|AK214568	Akirin1	-4.662
A_55_P2098995	ref|NM_001025575|ens|ENSMUST00000111984|ens|ENSMUST00000094484|ens|ENSMUST00000094489	Cfhr2	-4.662
A_55_P2083351	ref|NM_010474|ens|ENSMUST00000053116|ens|ENSMUST00000117944|gb|AK087753	Hs3st1	-4.662
A_55_P2096535	ref|NM_133788|ref|NR_037908|ens|ENSMUST00000048892|ens|ENSMUST00000151372	Icmt	-4.662
A_30_P01027445	Unknown	chr19:56820850-56837925_R	-4.662
A_55_P2142928	ref|NM_178721|ref|NM_001145977|ens|ENSMUST00000120898|ens|ENSMUST00000120594	Cadm2	-4.656
A_55_P1996852	nap|NAP000533-003	NAP000533-003	-4.656
A_52_P198009	ref|NM_001081210|ens|ENSMUST00000027464|gb|AK156814|gb|AK146024	Mrpl44	-4.652
A_55_P1956457	ref|NM_029998|ens|ENSMUST00000022804|ens|ENSMUST00000057256|gb|AK035859	6030458C11Rik	-4.652
A_52_P504330	ref|NM_001003909|ens|ENSMUST00000043551|gb|BC089031|gb|AK010017	Ankib1	-4.652
A_55_P1955233	ref|NM_177115|ens|ENSMUST00000102912|gb|AK041088|tc|TC1588060	2014-03-03	-4.649
A_51_P156158	ref|NM_133821|ens|ENSMUST00000061047|gb|AB093251|gb|BC022703	Phlpp1	-4.649
A_55_P2103115	ref|NM_172843|ens|ENSMUST00000060404|ens|ENSMUST00000111757|gb|BC066790	Tor1aip2	-4.646
A_51_P282227	ref|NM_020577|ens|ENSMUST00000003655|gb|AK009814|gb|AK008104	As3mt	-4.646
A_65_P03874	ref|NM_175272|ref|NM_001111016|ens|ENSMUST00000064395|ens|ENSMUST00000107610	Nav2	-4.646
A_52_P150950	ref|NM_153157|ref|NM_153458|ens|ENSMUST00000051309|gb|AK044325	Olfm3	-4.646
A_30_P01025255	Unknown	chr6:51542802-51544588_R	-4.643
A_55_P1957213	gb|AK019465|tc|TC1677196|tc|TC1666470|tc|TC1681054	3930401B19Rik	-4.643
A_55_P2025840	ref|NM_033523|ens|ENSMUST00000093298|gb|BC051247|gb|BC066013	Spred2	-4.643
A_52_P375493	ens|ENSMUST00000170302|ens|ENSMUST00000079071|gb|AK030820|gb|AK013180	Tfdp1	-4.636
A_66_P114229	ens|ENSMUST00000039118|tc|TC1625950|nap|NAP050280-1	Zic5	-4.636
A_52_P187940	ref|NM_008494|ens|ENSMUST00000031555|gb|AK004642|tc|TC1602090	Lfng	-4.633
A_55_P2072522	ref|NM_053141|ens|ENSMUST00000051442|gb|BC115720|gb|BC116625	Pcdhb16	-4.633
A_51_P430900	ref|NM_013642|ens|ENSMUST00000126178|ens|ENSMUST00000025025|gb|X61940	Dusp1	-4.63
A_51_P246387	ref|NM_010918|ens|ENSMUST00000166087|ens|ENSMUST00000035112|gb|L04289	Nktr	-4.627
A_55_P1953646	ref|NM_144955|ens|ENSMUST00000044125|gb|BC138019|gb|BC138020	Nkx6-1	-4.627
A_52_P478394	ref|NM_173419|ens|ENSMUST00000063169|gb|AK082171|gb|BC038059	Dleu7	-4.627
A_66_P137556	ref|NM_011599|ens|ENSMUST00000132550|ens|ENSMUST00000102848|ens|ENSMUST00000072695	Tle1	-4.624
A_52_P208727	ref|NM_001114399|ens|ENSMUST00000106108|ens|ENSMUST00000135003|ens|ENSMUST00000030630	Zmym4	-4.62
A_55_P2085574	ref|NM_010906|ref|NM_001081982|ref|NM_001081981|ens|ENSMUST00000063596	Nfix	-4.62
A_30_P01018517	Unknown	chr18:77291264-77299664_F	-4.617
A_51_P205545	ref|NM_133930|ens|ENSMUST00000129125|ens|ENSMUST00000032422|gb|AK213383	Creld1	-4.617
A_52_P32903	ref|NM_001045536|ens|ENSMUST00000069395|ens|ENSMUST00000172220|ens|ENSMUST00000125122	Zzef1	-4.614
A_52_P602898	ref|NM_029891|ens|ENSMUST00000057093|gb|AK079123|gb|BC095972	Nkrf	-4.614
A_30_P01026714	Unknown	KCNQ1ot1	-4.611
A_52_P86116	ref|NM_173052|ens|ENSMUST00000016951|gb|BC030354|gb|AK018226	Serpinb1b	-4.611
A_55_P2181271	ref|NM_001163610|gb|AK004352|ens|ENSMUST00000113628|tc|TC1669364	Nhsl2	-4.611
A_51_P401730	ref|NM_175153|ref|NM_001077631|ens|ENSMUST00000037504|ens|ENSMUST00000170517	2010321M09Rik	-4.608
A_55_P2155996	ens|ENSMUST00000095218|nap|NAP093366-001	ENSMUST00000095218	-4.608
A_55_P1954724	ref|NR_002860|ens|ENSMUST00000156081|ref|XR_104972|ref|XR_107773	A130040M12Rik	-4.608
A_51_P384148	ref|NM_013649|ref|NM_001042607|ens|ENSMUST00000035142|gb|S53216	Ryk	-4.601
A_52_P256757	ref|NM_144816|ens|ENSMUST00000026831|gb|AK140428|gb|BC023948	Rhbdl1	-4.592
A_55_P2059025	ref|NM_001163769|ref|NM_024187|ens|ENSMUST00000014684|ens|ENSMUST00000166526	U2af1	-4.592
A_52_P575668	nap|NAP097103-001	NAP097103-001	-4.588
A_30_P01033082	Unknown	chr1:139822286-139822985_F	-4.588
A_52_P93066	ref|NM_001081237|ens|ENSMUST00000036003|ens|ENSMUST00000171932|gb|AK129335	Klhdc5	-4.582
A_52_P283524	ref|NM_022980|ens|ENSMUST00000030606|gb|AK155270|gb|BC059001	Rcan3	-4.582
A_55_P2061094	ref|NM_008033|ens|ENSMUST00000016138|gb|AK010744|riken|2410089B03	Fnta	-4.582
A_51_P398887	ref|NM_031251|ens|ENSMUST00000108476|ens|ENSMUST00000006103|gb|AK170790	Ctns	-4.582
A_55_P2028522	ref|NM_016853|ens|ENSMUST00000035083|ens|ENSMUST00000161995|gb|AK143440	Stac	-4.582
A_30_P01024589	Unknown	chr10:116814196-116920696_F	-4.579
A_30_P01032023	Unknown	chr15:96032592-96116907_F	-4.576
A_55_P1954768	Unknown	A_55_P1954768	-4.573
A_55_P2038303	tc|TC1637523|nap|NAP112236-1	TC1637523	-4.569
A_52_P154833	ref|NM_019683|ens|ENSMUST00000034406|gb|AK137504|gb|AK157315	Ankrd49	-4.569
A_55_P2073682	ref|NM_001013385|ens|ENSMUST00000088073|ens|ENSMUST00000163112|ens|ENSMUST00000118489	Grm4	-4.569
A_52_P686091	ref|NM_011078|ens|ENSMUST00000035540|gb|AK134358|gb|AK172995	Phf2	-4.569
A_55_P2125013	ref|NM_178210|ref|NM_178211|ens|ENSMUST00000087714|ens|ENSMUST00000102983	Hist1h4j	-4.569
A_51_P359272	ref|NM_009655|ens|ENSMUST00000164888|ens|ENSMUST00000023312|gb|AB003026	Alcam	-4.566
A_55_P2082050	ref|NM_001025572|ens|ENSMUST00000038116|gb|AK045925|gb|AK035216	Ankrd12	-4.56
A_51_P292877	ref|NM_177214|ens|ENSMUST00000131435|ens|ENSMUST00000103220|gb|BC011390	Snrnp200	-4.56
A_52_P403443	ref|NM_001083587|ens|ENSMUST00000020695|gb|AK147781|gb|BC023928	Tns3	-4.56
A_52_P540470	ref|NM_001033341|gb|AK173237|gb|BC057072|ens|ENSMUST00000125763	Zfp407	-4.56
A_55_P2073705	ref|NM_178667|ref|NM_001184706|ref|NM_001184708|ref|NM_001184709	Tfdp2	-4.56
A_52_P184149	ref|NM_008638|ens|ENSMUST00000005810|gb|AK192847|gb|AK190402	Mthfd2	-4.557
A_51_P159814	ref|NM_029945|ref|NM_001164609|ref|NM_001164610|ref|NM_001164611	Smpd4	-4.557
A_55_P2106956	ref|NR_004447|gb|AK002273|riken|0610007C02	Gm5523	-4.554
A_51_P246092	ref|NM_027074|ens|ENSMUST00000078770|gb|AK006335|gb|BC061241	1700025F22Rik	-4.554
A_55_P2184811	ref|NM_026114|ens|ENSMUST00000071230|gb|AK143499|tc|TC1604119	Eif2s1	-4.55
A_30_P01018141	Unknown	chr6:140639450-140662200_F	-4.55
A_66_P136372	ref|NM_030116|ens|ENSMUST00000029786|gb|AK040055|gb|AK161563	Mrpl9	-4.55
A_51_P419017	ref|NM_011866|ens|ENSMUST00000115717|ens|ENSMUST00000089085|ens|ENSMUST00000115718	Pde10a	-4.547
A_30_P01026409	Unknown	chr12:33808493-33829143_R	-4.547
A_66_P106789	ens|ENSMUST00000169692|nap|NAP014486-001	ENSMUST00000169692	-4.547
A_30_P01030063	Unknown	chr7:69024136-69131056_R	-4.544
A_52_P375638	ref|NM_013818|ens|ENSMUST00000046463|gb|AK158342|gb|AK150068	Gtpbp1	-4.544
A_51_P118742	ref|NM_021354|ens|ENSMUST00000018568|gb|AJ243590|gb|BC082564	Drg2	-4.541
A_55_P2373987	gb|AK047818|tc|TC1598582|riken|C130001E07	A730009E18Rik	-4.541
A_51_P127464	ref|NM_199149|ens|ENSMUST00000058444|gb|AK050946|gb|AK160935	Ppp1r37	-4.538
A_52_P325443	ref|NM_172525|ens|ENSMUST00000037958|gb|BC031572|gb|BC052858	Arhgap29	-4.538
A_55_P2159070	ref|NR_027984|ens|ENSMUST00000061537|ref|XM_003086186|gb|AK012812	2810025M15Rik	-4.538
A_52_P582568	ref|NM_177387|ens|ENSMUST00000061601|gb|AK029782|tc|TC1601188	Ust	-4.538
A_55_P2106584	ref|NM_201243|ref|NM_009957|ref|NM_001174154|ref|NM_007766	Pcdha8	-4.538
A_55_P2055199	ref|NR_027784|ref|NR_002853|gb|AK012942|gb|BC009123	Airn	-4.535
A_51_P436020	ref|NM_025335|ens|ENSMUST00000161568|gb|AK012161|gb|AK161037	Tmem167	-4.535
A_55_P1959833	ref|NM_172923|ens|ENSMUST00000085754|ens|ENSMUST00000034862|gb|AK036040	AI118078	-4.532
A_30_P01025169	Unknown	chr9:48889364-48910736_F	-4.532
A_51_P212419	ref|NM_153521|ens|ENSMUST00000030471|gb|AK217820|gb|AK154613	Lrrc41	-4.532
A_55_P2049122	ref|NM_181540|ens|ENSMUST00000049197|ens|ENSMUST00000163597|ens|ENSMUST00000110160	Tm6sf2	-4.528
A_51_P238448	ref|NM_007632|ref|NM_001081636|ref|NM_001081635|ens|ENSMUST00000171031	Ccnd3	-4.528
A_55_P2003338	ref|NM_001045520|ens|ENSMUST00000164692|ens|ENSMUST00000133715|ens|ENSMUST00000109261	Clint1	-4.528
A_55_P1954643	gb|AK036683|tc|TC1692497|riken|9830162J21|nap|NAP079366-1	2310081J21Rik	-4.528
A_55_P2007756	ref|NM_008470|ens|ENSMUST00000103126|ens|ENSMUST00000007280|gb|AK137631	Krt16	-4.525
A_55_P2249220	gb|AK079887|tc|TC1622460|tc|TC1675095|riken|A430102J17	A430102J17Rik	-4.525
A_52_P655948	ref|NM_001164580|ens|ENSMUST00000060175|gb|AK148546|gb|AK164547	BC030336	-4.525
A_55_P2001218	ref|NM_009855|ens|ENSMUST00000114728|ens|ENSMUST00000099816|gb|X60958	Cd80	-4.525
A_55_P2052696	ref|NM_201639|ref|NM_207663|ref|NM_183312|ens|ENSMUST00000056808	Synm	-4.519
A_55_P2099080	ref|NM_008363|ref|NM_001177973|ref|NM_001177975|ens|ENSMUST00000114352	Irak1	-4.519
A_55_P2106583	Unknown	A_55_P2106583	-4.519
A_51_P430950	ref|NM_009041|ref|NM_001104616|ens|ENSMUST00000000590|ens|ENSMUST00000172248	Rdx	-4.516
A_30_P01018632	Unknown	chr8:124713947-124714299_F	-4.513
A_66_P125437	ref|NM_009083|ens|ENSMUST00000009039|gb|AK002988|tc|TC1706017	Rpl30	-4.513
A_55_P2168321	nap|NAP114507-1	NAP114507-1	-4.506
A_52_P485766	ref|NM_172554|ens|ENSMUST00000041723|gb|AK122406|gb|AK088853	Zdhhc17	-4.503
A_51_P392291	ref|NM_145630|ens|ENSMUST00000045748|gb|AK075985|gb|AK088478	Pdk3	-4.503
A_52_P303021	ens|ENSMUST00000035534	ENSMUST00000035534	-4.503
A_55_P2176260	nap|NAP094054-001	NAP094054-001	-4.5
A_55_P2064412	Unknown	A_55_P2064412	-4.497
A_51_P503303	ref|NM_021550|ens|ENSMUST00000058265|gb|AK008040|gb|AK005118	C1galt1c1	-4.497
A_55_P2076713	ref|NM_028260|ens|ENSMUST00000037499|gb|AK011278|gb|AK011466	Immp1l	-4.497
A_52_P404461	ref|NM_177601|ens|ENSMUST00000115259|gb|AK041036|gb|BC027828	Tmem60	-4.497
A_51_P129464	ref|NM_009128|ens|ENSMUST00000026221|gb|AK078543|gb|AK159413	Scd2	-4.497
A_52_P450934	ref|NM_198414|ens|ENSMUST00000079597|gb|AK006159|gb|AY424298	Paqr9	-4.497
A_51_P214107	ref|NM_024196|gb|BC002196|gb|AK213557|gb|AK181212	Tbc1d20	-4.491
A_55_P2006366	nap|NAP106421-1	NAP106421-1	-4.488
A_52_P413584	ens|ENSMUST00000121927|gb|AK078829|gb|BC062260|gb|AK088511	Nrip1	-4.488
A_51_P145415	ref|NM_145130|ens|ENSMUST00000130020|ens|ENSMUST00000135516|ens|ENSMUST00000004381	Lpcat3	-4.485
A_51_P341349	ref|NM_024433|ens|ENSMUST00000058030|gb|AK167319|gb|AK005064	Mtap	-4.485
A_52_P533280	ref|NM_013637|ens|ENSMUST00000023144|gb|AK007068|gb|AK018980	Prm1	-4.485
A_55_P2014332	ref|NM_175275|ens|ENSMUST00000107190|ens|ENSMUST00000169371|ens|ENSMUST00000047023	Cntln	-4.482
A_65_P19780	ref|NM_010638|ens|ENSMUST00000036884|gb|BC138725|gb|BC138724	Klf9	-4.482
A_52_P89477	ens|ENSMUST00000046521|gb|AK147659|gb|AK084676|gb|AK020724	Bcl9	-4.482
A_55_P2419296	gb|AK003491|riken|1110006E14	1110006E14Rik	-4.478
A_55_P2128169	ref|NM_025879|ref|NM_001093759|ref|NM_001093760|ens|ENSMUST00000141557	2410002O22Rik	-4.475
A_55_P1991199	ref|NM_001109985|ens|ENSMUST00000162709|ens|ENSMUST00000160456|gb|AK122290	Nos1ap	-4.475
A_55_P1998023	Unknown	A_55_P1998023	-4.475
A_55_P2172233	Unknown	A_55_P2172233	-4.472
A_30_P01029237	Unknown	chr14:21449863-21450640_R	-4.472
A_51_P103865	ref|NM_027242|ens|ENSMUST00000031739|ens|ENSMUST00000152298|gb|AK008148	Ppp1r35	-4.469
A_30_P01021405	Unknown	chr12:17438940-17439119_F	-4.469
A_55_P2149001	Unknown	A_55_P2149001	-4.469
A_52_P573552	ref|NM_144549|ens|ENSMUST00000067543|gb|AK162876|gb|AK028626	Trib1	-4.469
A_52_P373575	ref|NR_028423|gb|AK046235|gb|AK043120|gb|AK045761	A530058N18Rik	-4.469
A_52_P262219	ref|NM_010234|ens|ENSMUST00000021674|gb|AK159667|gb|AK159688	Fos	-4.466
A_52_P441044	ref|NM_133231|ens|ENSMUST00000044373|gb|AK087489|tc|TC1602990	Rfxap	-4.466
A_51_P233153	ref|NM_153163|ref|NM_001252105|ref|NM_001252110|ref|NM_001252106	Cadps2	-4.466
A_55_P2008870	ref|XM_141816|ref|XM_906854|nap|NAP021037-001	Gm4910	-4.466
A_52_P299358	ref|NM_001081071|ref|NM_001177967|ref|NM_001177968|ens|ENSMUST00000067545	Lclat1	-4.463
A_66_P126603	Unknown	A_66_P126603	-4.463
A_66_P120572	ref|XM_003084493|gb|AK040965|gb|AK138941|tc|TC1626372	Gm14488	-4.46
A_52_P327467	ref|NM_025426|ref|NM_001104530|ref|NM_001104556|ref|NM_001104557	Med7	-4.46
A_30_P01022264	Unknown	chr9:30805020-30810645_R	-4.454
A_30_P01029384	Unknown	chr3:125556577-125557102_R	-4.454
A_30_P01027625	Unknown	chr8:113968152-113973727_F	-4.448
A_55_P2051405	ref|NM_001040400|ens|ENSMUST00000098603|gb|DQ079067|gb|AK137048	Tet2	-4.448
A_55_P1992884	nap|NAP114441-1	NAP114441-1	-4.444
A_30_P01023617	Unknown	chr4:138657728-138687028_R	-4.438
A_52_P604515	ref|NM_024467|ens|ENSMUST00000057717|gb|AK052274|gb|AK089263	Zfp319	-4.438
A_51_P170641	ref|NM_030246|ref|NM_001165256|ens|ENSMUST00000021645|gb|AK215592	Dcaf4	-4.438
A_55_P2449750	ref|NM_001100116|ref|NM_028527|ens|ENSMUST00000038355|ens|ENSMUST00000101415	1700047I17Rik2	-4.438
A_66_P110091	ens|ENSMUST00000144029|ref|XR_106441|ref|XR_107579|gb|AK081400	ENSMUST00000144029	-4.435
A_66_P130882	ref|NM_008388|ens|ENSMUST00000022960|gb|AK181127|gb|AK011436	Eif3e	-4.435
A_55_P1963124	nap|NAP061945-1	NAP061945-1	-4.432
A_30_P01023905	Unknown	chr12:82495575-82516300_F	-4.429
A_65_P20683	ref|XR_105056|ref|XR_107838|gb|BC147402|gb|AK136050	Gm1070	-4.429
A_52_P283055	ref|NM_017391|ens|ENSMUST00000113975|gb|AK133105|gb|CD776705	Slc5a3	-4.426
A_30_P01030682	Unknown	chr5:77084398-77086144_R	-4.426
A_51_P464023	ref|NM_021528|ens|ENSMUST00000043050|gb|AK171208|gb|AK142155	Chst12	-4.426
A_30_P01023331	Unknown	chrX:165792277-165807952_F	-4.426
A_52_P134666	ref|NM_026130|ens|ENSMUST00000034541|gb|AK004967|gb|AK038017	Srpr	-4.423
A_55_P2039532	ref|NM_011040|ens|ENSMUST00000028355|gb|AK050717|gb|X57487	Pax8	-4.423
A_55_P2155181	Unknown	A_55_P2155181	-4.42
A_55_P2179413	ref|NM_011150|ens|ENSMUST00000043722|ens|ENSMUST00000144529|gb|AK214540	Lgals3bp	-4.417
A_30_P01032862	Unknown	chr11:117835849-117842574_R	-4.417
A_55_P2062480	Unknown	A_55_P2062480	-4.411
A_51_P143915	ref|NM_025607|ens|ENSMUST00000125554|ens|ENSMUST00000069580|gb|AK208815	Rnf181	-4.408
A_55_P2266880	ref|NM_001170985|ref|NM_130867|ens|ENSMUST00000107618|ens|ENSMUST00000159976	Kirrel	-4.408
A_55_P1958314	ref|NM_027409|ens|ENSMUST00000023836|ens|ENSMUST00000096447|gb|AK007533	Mospd1	-4.408
A_55_P2140843	Unknown	A_55_P2140843	-4.408
A_55_P1978471	Unknown	A_55_P1978471	-4.405
A_52_P431894	ref|NM_016670|ref|NR_027493|ens|ENSMUST00000097352|gb|AK011179	Pknox1	-4.405
A_66_P138137	ref|NM_013632|ens|ENSMUST00000048615|gb|AK153451|gb|X56548	Pnp	-4.405
A_55_P1992319	ref|NM_023420|ref|NM_001164222|ens|ENSMUST00000077672|ens|ENSMUST00000109444	Col4a3bp	-4.402
A_52_P464003	ref|NM_026402|ens|ENSMUST00000150390|ens|ENSMUST00000023343|gb|AK213960	Atg3	-4.402
A_55_P1968068	ref|NM_011640|ref|NM_001127233|ens|ENSMUST00000163758|ens|ENSMUST00000108658	Trp53	-4.398
A_55_P2070352	ref|NM_007782|ref|NM_001252651|ref|NR_045561|ens|ENSMUST00000030673	Csf3r	-4.398
A_52_P596541	ref|NM_133950|ens|ENSMUST00000002855|gb|AK078785|gb|AJ278132	Kdelr1	-4.398
A_30_P01027972	Unknown	chr18:84306000-84306316_F	-4.398
A_52_P125350	ref|NM_023210|ref|NM_001253757|ref|NM_001253758|ens|ENSMUST00000165307	Anp32e	-4.395
A_30_P01026277	Unknown	chr2:35828611-35838083_F	-4.392
A_55_P1997145	ref|NM_001163743|ens|ENSMUST00000169651|gb|AK089260|gb|AK145780	Nlrx1	-4.392
A_55_P2170787	ref|NM_139294|ens|ENSMUST00000002487|gb|AK140431|gb|AF454556	Braf	-4.392
A_55_P2376701	gb|AK082411|gb|BB652865|tc|TC1606808|riken|C230048B01	A230057D06Rik	-4.389
A_51_P387302	ref|NM_029498|ens|ENSMUST00000022511|gb|BC141403|gb|AK017929	Zmym2	-4.389
A_30_P01028567	Unknown	chr11:6748267-6818192_F	-4.389
A_51_P288891	ref|NM_025706|ens|ENSMUST00000020339|gb|AK078875|gb|AK135905	Tbc1d15	-4.389
A_52_P216427	ref|NM_009385|ref|NM_001146198|ens|ENSMUST00000001536|gb|AK136362	Nkx2-1	-4.386
A_55_P1971619	nap|NAP114307-1	NAP114307-1	-4.386
A_30_P01027329	Unknown	chr15:102932714-102935033_F	-4.386
A_55_P2006668	ref|NM_175356|ens|ENSMUST00000072287|gb|AK172074|gb|AK028974	Pi4kb	-4.386
A_30_P01023199	Unknown	chr11:3548300-3549676_R	-4.38
A_30_P01022420	Unknown	chr2:35828611-35838083_R	-4.38
A_30_P01023977	Unknown	chr5:33773382-33776739_R	-4.38
GE_BrightCorner	Unknown	GE_BrightCorner	-4.377
A_55_P1960451	ref|NM_001164805|ens|ENSMUST00000046121|ens|ENSMUST00000137836|ens|ENSMUST00000119581	Thsd7a	-4.377
A_55_P2122150	ref|NM_198702|ens|ENSMUST00000117407|gb|BC088989|gb|BC058992	Lphn3	-4.377
A_55_P2058601	gb|AK077025|gb|AV273793|tc|TC1587491|riken|4932413L07	AK077025	-4.374
A_52_P566348	ref|NM_010937|ens|ENSMUST00000128264|ens|ENSMUST00000029445|gb|AK088623	Nras	-4.374
A_51_P169047	ref|NM_019551|ens|ENSMUST00000038039|gb|AK217996|gb|AJ251328	Tdp2	-4.371
A_55_P2186558	ref|NM_027457|ens|ENSMUST00000005053|gb|AK009851|gb|AK158107	5730437N04Rik	-4.371
A_55_P2077879	ref|NM_017479|ref|NM_001205241|ens|ENSMUST00000112458|ens|ENSMUST00000069648	Myst4	-4.368
A_52_P308507	ref|NM_173368|ens|ENSMUST00000039782|gb|AK017414|gb|AK078565	Chd6	-4.368
A_52_P596008	ref|NM_015753|ens|ENSMUST00000076836|ens|ENSMUST00000028229|ens|ENSMUST00000068415	Zeb2	-4.365
A_52_P547662	ref|NM_008772|ens|ENSMUST00000029331|gb|AK036611|gb|AK030759	P2ry1	-4.362
A_55_P2095010	Unknown	A_55_P2095010	-4.362
A_55_P1962224	ref|NM_146102|ref|NM_001177796|ref|NM_001177797|ens|ENSMUST00000111584	Afap1l2	-4.359
A_30_P01024070	Unknown	chr17:95255725-95272425_R	-4.359
A_30_P01033280	Unknown	chr16:40312038-40315564_F	-4.359
A_55_P2037662	ref|NM_144921|ens|ENSMUST00000080882|ens|ENSMUST00000102858|gb|BC027000	Atp1a3	-4.359
A_51_P202033	ref|NM_026582|ref|NR_037590|ens|ENSMUST00000068952|gb|AK029104	Wls	-4.359
A_55_P2410304	ref|NM_001146275|ref|NM_021792|ens|ENSMUST00000032473|ens|ENSMUST00000066912	Iigp1	-4.356
A_30_P01026537	Unknown	chr7:66570691-66573827_R	-4.356
A_51_P507280	ref|NM_172635|ens|ENSMUST00000061618|gb|AK170918|gb|AK154102	Patl1	-4.356
A_55_P2141585	tc|TC1597894|nap|NAP121919-001	TC1597894	-4.353
A_52_P612382	ref|NM_023117|ref|NM_001111075|ens|ENSMUST00000028804|gb|BC002287	Cdc25b	-4.353
A_52_P434052	ref|NM_001039388|ref|NM_172445|ens|ENSMUST00000054251|ens|ENSMUST00000021572	Wdr37	-4.347
A_51_P246471	ref|NM_017463|ens|ENSMUST00000038149|gb|BC010287|gb|BC062147	Pbx2	-4.347
A_30_P01019598	Unknown	chr14:105508625-105513462_R	-4.344
A_55_P2259500	ref|XM_003085392|ref|XM_003085739|gb|AK083809|tc|TC1591977	D130012P04Rik	-4.344
A_55_P2021065	ref|NM_153158|ens|ENSMUST00000052420|gb|BC037070|gb|AK047601	E130308A19Rik	-4.341
A_51_P311362	ens|ENSMUST00000022711|gb|AK015429|tc|TC1596018|riken|4930449E01	ENSMUST00000022711	-4.341
A_30_P01022362	Unknown	chr2:174917150-174935618_R	-4.341
A_55_P2081253	ref|NM_023689|ref|NM_001252620|ref|NM_001252621|ens|ENSMUST00000119068	Spock3	-4.341
A_52_P561927	ref|NM_011308|ref|NM_001252313|ens|ENSMUST00000108708|ens|ENSMUST00000101066	Ncor1	-4.341
A_51_P519385	ref|NM_030692|ens|ENSMUST00000026270|gb|AJ297526|gb|AK154759	Sacm1l	-4.341
A_55_P2148921	ref|NM_033327|ens|ENSMUST00000109655|gb|BC139028|gb|BC139030	Zfp423	-4.338
A_55_P2408778	ref|NR_027907|gb|AK138227|tc|TC1613750|riken|A230039C17	AI414108	-4.338
A_52_P356780	ref|NM_001033222|ens|ENSMUST00000099274|gb|AK004145|riken|1110037L13	Pdzd8	-4.338
A_51_P419389	ref|NM_007561|ens|ENSMUST00000087435|gb|AF003942|gb|AK138715	Bmpr2	-4.335
A_55_P1985105	ref|NM_001252072|ens|ENSMUST00000106437|gb|XM_893564	Hs3st4	-4.332
A_52_P612693	ref|NM_011130|ens|ENSMUST00000033938|gb|AF513911|gb|AK160672	Polb	-4.332
A_55_P2097869	ref|NM_172862|ens|ENSMUST00000108016|ens|ENSMUST00000091137|gb|AK018388	Frem2	-4.332
A_52_P40367	ref|NM_026065|ens|ENSMUST00000075829|gb|AK012227|gb|AK013693	Mrpl42	-4.332
A_51_P387608	ref|NM_010431|ens|ENSMUST00000021530|gb|AF003695|gb|AK150367	Hif1a	-4.332
A_55_P2296088	ref|NM_001018042|ref|NM_001098425|ens|ENSMUST00000133615|ens|ENSMUST00000066003	Sp3	-4.329
A_51_P320888	ref|NM_001033242|ens|ENSMUST00000022721|gb|BC141314|gb|BC141315	Cln5	-4.329
A_55_P2073617	gb|M92416|nap|NAP016983-001	Fgf6	-4.326
A_55_P2142008	ref|NM_027500|ens|ENSMUST00000029552|gb|AK017833|tc|TC1679380	4933434E20Rik	-4.326
A_30_P01033145	Unknown	chr7:48794017-48815817_F	-4.323
A_55_P2093013	nap|NAP059413-1	NAP059413-1	-4.323
A_51_P240614	ref|NM_008536|ens|ENSMUST00000029376|gb|AK134603|gb|AK164718	Tm4sf1	-4.32
A_66_P122758	ref|NM_177325|ens|ENSMUST00000045807|gb|BC031531|gb|AK154063	Tsr1	-4.32
A_30_P01024580	Unknown	chr10:33709588-33712046_R	-4.32
A_52_P367565	ref|NM_080452|ref|NM_001166031|ens|ENSMUST00000146332|ens|ENSMUST00000123533	Mrps2	-4.317
A_52_P93933	ref|NM_008562|ens|ENSMUST00000037947|gb|AK010424|gb|BC005427	Mcl1	-4.317
A_66_P116311	ref|NM_008448|ens|ENSMUST00000025083|gb|AK163055|gb|AK151264	Kif5b	-4.317
A_66_P105764	ref|NM_133673|ens|ENSMUST00000133544|ens|ENSMUST00000156711|ens|ENSMUST00000028199	Tor1b	-4.314
A_52_P462350	ref|NM_026106|ens|ENSMUST00000031190|gb|AK075713|gb|AK144749	Dr1	-4.314
A_55_P2118173	ref|NM_010514|ref|NM_001122736|ref|NM_001122737|ens|ENSMUST00000105935	Igf2	-4.314
A_30_P01026357	Unknown	chr4:116790373-116797823_F	-4.314
A_55_P1957291	ref|NM_026055|ens|ENSMUST00000142604|ens|ENSMUST00000115231|ref|XM_003085986	Rpl39	-4.314
A_55_P1974317	ref|NM_009298|ens|ENSMUST00000047632|gb|AK077989|gb|AK132194	Surf6	-4.311
A_55_P1977653	ref|NM_001081390|ens|ENSMUST00000034057|ens|ENSMUST00000036243|ens|ENSMUST00000063451	Palld	-4.311
A_52_P150114	nap|NAP115343-1|nap|NAP061498-1	NAP115343-1	-4.311
A_30_P01027094	Unknown	chr14:65431652-65437902_F	-4.308
A_55_P2137591	ref|NM_025739|ens|ENSMUST00000094853|ens|ENSMUST00000097914|ens|ENSMUST00000102690	Rnf220	-4.308
A_51_P329332	ref|NM_054087|ens|ENSMUST00000044021|gb|AF360396|gb|AF216204	Slc19a2	-4.305
A_30_P01025860	Unknown	chr11:112898724-113062945_F	-4.305
A_55_P2174942	nap|NAP059947-1|nap|NAP102330-1	NAP059947-1	-4.305
A_51_P249537	ref|NM_173741|ens|ENSMUST00000160349|ens|ENSMUST00000026833|gb|AK170253	Wdr24	-4.302
A_30_P01020686	Unknown	chr16:43623581-43642715_F	-4.302
A_55_P1955427	ref|NM_009986|ens|ENSMUST00000004097|gb|BC090847|gb|AK220173	Cux1	-4.302
A_52_P500002	ref|NM_001085421|ens|ENSMUST00000042021|gb|BC079547|gb|AK031988	Tspyl5	-4.302
A_52_P378287	ref|NM_027448|ens|ENSMUST00000034791|gb|AK017509|gb|BC049101	Lca5	-4.302
A_55_P2058851	ref|NM_001115087|ens|ENSMUST00000169357	Fancf	-4.302
A_51_P463401	ref|NM_172887|ens|ENSMUST00000045502|ens|ENSMUST00000087204|ens|ENSMUST00000052630	Fry	-4.302
A_55_P2160204	nap|NAP060545-1	NAP060545-1	-4.302
A_52_P269158	ref|NM_001003948|ens|ENSMUST00000051845|ens|ENSMUST00000168574|ens|ENSMUST00000167490	Pid1	-4.299
A_51_P514961	ref|NM_178892|ens|ENSMUST00000047906|gb|BC068173|gb|AK028529	Tiparp	-4.299
A_52_P464129	ref|NM_001142938|ens|ENSMUST00000173969|gb|AK010878|tc|TC1627224	AK010878	-4.299
A_55_P2125496	ref|NR_045392|ens|ENSMUST00000099124|gb|AK077188|riken|4933425C03	Gm10731	-4.296
A_55_P2186615	ref|NM_001110239|ref|NM_021330|ens|ENSMUST00000062740|ens|ENSMUST00000074038	Acp1	-4.296
A_66_P140307	nap|NAP058906-1	NAP058906-1	-4.293
A_30_P01030079	Unknown	chr8:83218278-83223553_F	-4.293
A_52_P52303	ref|NM_001131020|ens|ENSMUST00000077902|gb|AK140151|tc|TC1640428	Gfap	-4.293
A_55_P2065586	ref|NR_040403|ref|NR_040404|ens|ENSMUST00000126926|gb|AK136654	Gm15417	-4.29
A_51_P327530	ref|NM_026635|ens|ENSMUST00000034945|gb|AK216263|gb|AK077700	Fam96a	-4.287
A_66_P129672	ref|NM_026273|ens|ENSMUST00000165918|ens|ENSMUST00000162732|gb|AK161311	4930453N24Rik	-4.287
A_30_P01024258	Unknown	chr15:85300937-85301522_F	-4.287
A_51_P184223	ref|NM_053132|ens|ENSMUST00000053037|gb|AK043979|gb|AK046463	Pcdhb7	-4.287
A_55_P2299524	ref|NM_022723|ens|ENSMUST00000144773|ens|ENSMUST00000171496|gb|BC080278	Scube1	-4.284
A_55_P2362601	gb|AK078562|tc|TC1729804|riken|7030402E17|nap|NAP019515-001	D4Ertd681e	-4.284
A_52_P381806	ref|NM_020584|ens|ENSMUST00000052138|gb|BC012270|gb|AK214613	Terf2ip	-4.284
A_30_P01024291	Unknown	chr12:110074255-110075707_F	-4.284
A_51_P387845	ref|NM_001033268|ens|ENSMUST00000060805|gb|AK172909|gb|BC010304	Fam120a	-4.281
A_52_P463183	gb|AK147689|gb|AK166056|tc|TC1651604|riken|M5C1108F01	Asap1	-4.281
A_55_P1954393	ref|NM_144796|ens|ENSMUST00000048739|ens|ENSMUST00000085724|gb|AK035779	Susd4	-4.278
A_51_P417053	ref|NM_011656|ens|ENSMUST00000107279|ens|ENSMUST00000107278|ens|ENSMUST00000006123	Tuft1	-4.278
A_52_P162957	ref|NM_177603|ens|ENSMUST00000059231|gb|AK081171|gb|BC085510	Frat2	-4.275
A_51_P307944	ref|NM_010102|ens|ENSMUST00000053646|gb|AJ006074|gb|BC107000	S1pr4	-4.272
A_55_P2053456	ref|NR_003363|gb|BC089461|nap|NAP103085-1|nap|NAP113735-1	Gm6548	-4.269
A_55_P2009752	ref|NM_172563|ens|ENSMUST00000043658|ens|ENSMUST00000107881|ens|ENSMUST00000004051	Hlf	-4.269
A_51_P480499	ref|NM_010926|ens|ENSMUST00000034277|gb|AK076710|gb|AF052621	Cox4nb	-4.269
A_55_P2336558	ref|NM_001163640|ref|NM_023543|ens|ENSMUST00000164830|ens|ENSMUST00000067741	Chn2	-4.269
A_51_P441974	ref|NM_008847|gb|D86177|gb|AK098097|gb|BC031774	Pip5k1a	-4.269
A_55_P2232988	ref|NM_020052|ens|ENSMUST00000007423|gb|AK142950|ens|ENSMUST00000106729	Scube2	-4.266
A_52_P566605	ref|NM_010476|ens|ENSMUST00000027989|gb|AK028380|gb|AK050211	Hsd17b7	-4.266
A_52_P301261	ref|NM_001045533|ens|ENSMUST00000047786|gb|AK043443|gb|BC056494	2014-03-04	-4.266
A_55_P2000930	ref|NM_001097644|ens|ENSMUST00000094898|gb|AK079350|ens|ENSMUST00000114077	Ccnyl1	-4.266
A_55_P2185526	gb|HM627212	HM627212	-4.263
A_51_P255329	ref|NM_025934|ens|ENSMUST00000024620|gb|BC080771|gb|AK049232	Riok2	-4.26
A_30_P01030040	Unknown	chr8:49872686-49872913_F	-4.26
A_55_P2053206	ref|NM_144787|ref|NM_001172095|ens|ENSMUST00000077851|ens|ENSMUST00000030102	Kdm4c	-4.26
A_55_P2016623	ens|ENSMUST00000085288|ref|XM_204772|nap|NAP070885-1	Gm5068	-4.26
A_55_P2184009	ref|NM_009708|ens|ENSMUST00000153185|ens|ENSMUST00000001347|gb|BC107022	Rnd2	-4.257
A_55_P2021094	gb|BC096660|gb|BC032285	Tmem181b-ps	-4.257
A_55_P1968668	ref|NM_027405|ens|ENSMUST00000110212|ens|ENSMUST00000071106|gb|BC048169	1700020O03Rik	-4.257
A_55_P2162811	gb|BC031453|gb|BC055913|tc|TC1622498|nap|NAP112390-1	BC031453	-4.257
A_55_P2127617	ref|NM_001081227|ens|ENSMUST00000136521|tc|TC1632316	6330403A02Rik	-4.255
A_52_P212214	ref|NM_153415|ens|ENSMUST00000037788|gb|AK211754|gb|AK089079	Pomt2	-4.255
A_55_P2014867	ref|NM_173441|ens|ENSMUST00000025243|nap|NAP056007-1	Iws1	-4.252
A_55_P2091846	ref|NM_175472|ens|ENSMUST00000043368|ens|ENSMUST00000145590|ens|ENSMUST00000097925	Zcchc11	-4.249
A_55_P1965459	ref|NM_145492|ens|ENSMUST00000025288|gb|AK081096|gb|AI197084	Zfp521	-4.249
A_55_P1983268	ref|NM_001243238|ens|ENSMUST00000145070|gb|AK015384|ens|ENSMUST00000151004	4930444P10Rik	-4.249
A_51_P498212	ref|NM_019586|ens|ENSMUST00000124992|ens|ENSMUST00000135924|gb|AK149985	Ube2j1	-4.246
A_55_P2170599	Unknown	A_55_P2170599	-4.243
A_30_P01025092	Unknown	chr5:26323150-26357875_R	-4.243
A_52_P299846	ref|NM_021506|ens|ENSMUST00000093488|ens|ENSMUST00000034060|gb|AK136410	Sh3rf1	-4.243
A_51_P191909	ref|NM_080726|ens|ENSMUST00000164766|ens|ENSMUST00000022783|gb|BC018219	Rem2	-4.24
A_55_P2384248	ref|NR_040545|gb|AK015203|tc|TC1622868|riken|4930425O10	4930425O10Rik	-4.237
A_51_P333859	ref|NM_175448|ens|ENSMUST00000019920|gb|AK139868|gb|AK039308	Clvs2	-4.237
A_55_P1980316	ref|NM_001103165|ref|NM_011042|ref|NM_001103166|ref|NM_001174073	Pcbp2	-4.237
A_55_P2067700	ref|NM_207018|ens|ENSMUST00000079035|gb|BC146528|gb|BC140257	Tas2r113	-4.234
A_51_P452820	ref|NM_053257|ref|NM_001252218|ref|NM_001252219|ens|ENSMUST00000086535	Rpl31	-4.231
A_66_P119420	ref|NM_199068|ens|ENSMUST00000100501|ens|ENSMUST00000072837|gb|AK147375	Foxk1	-4.225
A_55_P2006876	nap|NAP063136-1	NAP063136-1	-4.225
A_55_P2127659	ref|NM_023858|ref|NR_024025|ens|ENSMUST00000034396|ens|ENSMUST00000146901	Mtmr2	-4.225
A_52_P491073	ref|NM_080849|ens|ENSMUST00000131015|ens|ENSMUST00000125528|ens|ENSMUST00000152611	Nek8	-4.222
A_55_P2047837	ens|ENSMUST00000066636	Rhox10	-4.222
A_55_P1985143	Unknown	A_55_P1985143	-4.219
A_51_P351285	ref|NM_008794|ens|ENSMUST00000039059|ens|ENSMUST00000164485|gb|AK165389	Pcsk7	-4.219
A_55_P1982817	Unknown	A_55_P1982817	-4.219
A_52_P238846	ref|NM_011794|ens|ENSMUST00000027916|ref|XR_108179|gb|AK008714	Bpnt1	-4.216
A_51_P462972	ref|NM_144535|ens|ENSMUST00000037473|gb|AK016540|gb|BC023094	Mudeng	-4.216
A_30_P01026411	Unknown	chr12:21584725-21595050_R	-4.216
A_55_P1990535	ref|NM_021342|ens|ENSMUST00000113517|ens|ENSMUST00000057262|gb|BC034849	Kcne4	-4.213
A_55_P2145139	ens|ENSMUST00000098653|ref|XR_105223|gb|AK140235|riken|B230363F22	ENSMUST00000098653	-4.213
A_30_P01028464	Unknown	chr1:85150625-85185800_F	-4.213
A_55_P2032727	nap|NAP062640-1	NAP062640-1	-4.211
A_55_P2018825	gb|BC172047|gb|BC172049|gb|BC172057|gb|BC172058	BC172047	-4.208
A_30_P01031896	Unknown	chr10:21463672-21466812_F	-4.205
A_51_P450924	ref|NM_025882|ens|ENSMUST00000141138|ens|ENSMUST00000095786|gb|AK017956	Pole4	-4.205
A_30_P01021669	Unknown	chr8:122920901-123008463_F	-4.205
A_51_P199624	ref|NM_172276|ens|ENSMUST00000053737|ens|ENSMUST00000031394|gb|AK031872	Sfswap	-4.202
A_30_P01021750	Unknown	chr16:32388843-32395264_R	-4.202
A_66_P139355	ref|NM_013735|ens|ENSMUST00000110645|gb|AK036324|riken|9630056N05	Trp53bp1	-4.199
A_52_P143037	ref|NM_176942|ens|ENSMUST00000068456|gb|AK083185|gb|AK038476	Gabra5	-4.199
A_52_P585233	ref|NM_001114328|ens|ENSMUST00000124008|ens|ENSMUST00000150826|ens|ENSMUST00000085350	Ccpg1	-4.199
A_51_P298107	ref|NM_028813|ref|NM_001197028|ens|ENSMUST00000024880|gb|AK013193	Vit	-4.199
A_52_P497534	ref|NM_145940|ens|ENSMUST00000103060|gb|AK170563|gb|BC025560	Wipi1	-4.199
A_55_P1988760	ref|NM_175465|ens|ENSMUST00000102659|ens|ENSMUST00000044107|ens|ENSMUST00000102660	Sestd1	-4.199
A_66_P117610	ref|NR_037980|gb|AK041998|gb|BF463649|riken|A630051J06	Gm16894	-4.196
A_51_P408561	ref|NM_207219|ens|ENSMUST00000167180|ens|ENSMUST00000046651|gb|AK153512	AI314976	-4.196
A_30_P01031878	Unknown	chr3:87575891-87576343_F	-4.196
A_51_P493700	ref|NM_001039184|gb|AK032437|gb|AK172956|gb|BC030496	Cep350	-4.196
A_55_P2166399	ref|NM_011492|ens|ENSMUST00000099495|ens|ENSMUST00000144119|ens|ENSMUST00000144108	Stk11	-4.196
A_52_P470316	ref|NM_033521|ens|ENSMUST00000022867|gb|AK181324|gb|AK077269	Laptm4b	-4.196
A_55_P2060188	ens|ENSMUST00000120532|nap|NAP041808-1	Hira	-4.193
A_55_P2089223	ref|NM_001177602|ref|NM_001177604|ref|NM_001177605|ref|NM_009647	Ak4	-4.193
A_52_P297075	ref|NM_177171|ens|ENSMUST00000040583|gb|AK122493|gb|AK161523	Heatr5a	-4.193
A_65_P06611	ref|NM_175394|ref|NM_001113532|ens|ENSMUST00000160781|ens|ENSMUST00000159986	Wtap	-4.193
A_52_P510119	ref|NM_027629|ens|ENSMUST00000084935|gb|AK033119|gb|AK039189	Pgm2l1	-4.193
A_55_P2121456	ref|NM_177632|ens|ENSMUST00000059078|gb|AK137950|gb|BC022623	Fam43a	-4.193
A_52_P426870	ref|NM_001081225|ens|ENSMUST00000087330|ens|ENSMUST00000164268|ens|ENSMUST00000096053	Fam178a	-4.193
A_30_P01032425	Unknown	chr8:26345571-26346095_R	-4.19
A_30_P01022540	Unknown	chr15:79709500-79714700_R	-4.19
A_30_P01032979	Unknown	chr4:124206166-124334412_R	-4.19
A_55_P2175880	ref|NM_019946|ens|ENSMUST00000120230|ens|ENSMUST00000120302|ens|ENSMUST00000140932	Mgst1	-4.187
A_55_P2144305	ens|ENSMUST00000172721	ENSMUST00000172721	-4.184
A_52_P4046	ref|NM_054078|ens|ENSMUST00000170054|ens|ENSMUST00000045621|gb|AK149353	Baz2a	-4.181
A_30_P01027782	Unknown	chr14:105497388-105511063_R	-4.181
A_55_P2107745	ref|NM_009537|ens|ENSMUST00000021692|gb|M73963|gb|BC055899	Yy1	-4.181
A_55_P2135031	nap|NAP068632-1|nap|NAP070801-1	NAP068632-1	-4.179
A_55_P2141395	ref|NM_023463|ens|ENSMUST00000007260|ens|ENSMUST00000173478|gb|AK003375	Ly6g6c	-4.179
A_51_P397564	ref|NM_025645|ens|ENSMUST00000105994|gb|AK002371|gb|AK152287	Snrnp40	-4.179
A_51_P459661	ref|NM_021460|ref|NM_001111100|ens|ENSMUST00000049572|gb|AK088659	Lipa	-4.179
A_52_P253748	ref|NM_001024699|ens|ENSMUST00000051390|ens|ENSMUST00000172240|gb|AK154877	Zbtb45	-4.176
A_30_P01022768	Unknown	chr1:182685730-182689074_F	-4.173
A_30_P01026350	Unknown	chr5:149751979-149808240_R	-4.173
A_30_P01017743	Unknown	chr10:83181374-83249774_F	-4.17
A_55_P2015742	ref|NM_178647|ens|ENSMUST00000067744|gb|BC031191|gb|BC043097	Cggbp1	-4.167
A_55_P2065040	Unknown	A_55_P2065040	-4.167
A_66_P139387	ref|NM_011169|ens|ENSMUST00000005400|ens|ENSMUST00000124470|gb|BC005555	Prlr	-4.167
A_52_P925277	ref|NM_001079883|ref|NM_021399|ens|ENSMUST00000066060|gb|AK020296	Bcl11b	-4.164
A_30_P01033672	Unknown	chr11:35810031-35810205_F	-4.164
A_30_P01020991	Unknown	chr12:12916233-12919835_F	-4.164
A_52_P157880	nap|NAP000142-002	NAP000142-002	-4.161
A_55_P2104617	ref|NM_027008|ens|ENSMUST00000017090|gb|AK143644|gb|AK129077	Kctd5	-4.161
A_51_P317836	ref|NM_007593|ens|ENSMUST00000062769|gb|AK132753|gb|AK005736	Cetn1	-4.161
A_55_P2008106	ref|NM_152812|ens|ENSMUST00000041921|ens|ENSMUST00000117268|gb|BC087552	Otud6b	-4.161
A_51_P499169	ref|NM_028173|ens|ENSMUST00000027068|gb|AK142658|gb|AK028304	Tram1	-4.158
A_65_P02321	ref|NM_001033528|ens|ENSMUST00000141647|ens|ENSMUST00000092382|gb|AK028915	Usp36	-4.155
A_55_P2032633	ref|XM_001477798|ref|XM_136142|gb|BC022960|tc|TC1633225	BC022960	-4.155
A_55_P2045765	ref|NM_001033410|gb|AK146725|ens|ENSMUST00000091318|tc|TC1592744	Gm757	-4.153
A_51_P111612	ref|NM_001042592|gb|BC025091|gb|BC067413|gb|BB143451	Arrdc4	-4.153
A_55_P2100770	ref|NM_130879|ens|ENSMUST00000105837|ens|ENSMUST00000105839|ens|ENSMUST00000105838	Usp48	-4.153
A_30_P01023979	Unknown	chr13:48576557-48581836_F	-4.153
A_55_P2096166	Unknown	A_55_P2096166	-4.153
A_52_P225570	ref|NM_020606|ens|ENSMUST00000033030|gb|AK212791|gb|AK008197	Parva	-4.153
A_51_P263246	ref|NM_008748|ens|ENSMUST00000164254|ens|ENSMUST00000039926|gb|X95518	Dusp8	-4.15
A_55_P2014932	ens|ENSMUST00000160698|gb|AK133228|gb|CJ205475|riken|4932419C06	ENSMUST00000160698	-4.15
A_52_P318438	ref|NM_008667|ens|ENSMUST00000069792|gb|BC016886|gb|AK018122	Nab1	-4.147
A_30_P01023807	Unknown	chr14:28231577-28242027_R	-4.144
A_55_P2032770	ref|NM_033134|ens|ENSMUST00000114090|ens|ENSMUST00000131109|ens|ENSMUST00000146061	Inpp5e	-4.141
A_51_P301394	ref|NM_008179|gb|BC117825|gb|BC117826|gb|AK019241	Gspt2	-4.141
A_55_P1964363	ref|NM_001012434|ens|ENSMUST00000050732|gb|AY899809|gb|BC024588	Kctd14	-4.141
A_55_P2083419	ref|NM_026361|ref|NM_175464|ens|ENSMUST00000112577|ens|ENSMUST00000128233	Pkp4	-4.138
A_55_P1963889	ref|NM_172544|ref|NM_001198587|ref|NM_001252074|ens|ENSMUST00000167887	Nrxn3	-4.138
A_52_P451574	ref|NM_011273|ens|ENSMUST00000027741|gb|AK050114|gb|AK147403	Xpr1	-4.135
A_52_P460703	ref|NM_138956|ens|ENSMUST00000026902|gb|AK155495|gb|BC011511	Rassf3	-4.135
A_55_P2126489	ref|NM_001033474|ens|ENSMUST00000099276|gb|BC148578|gb|BC153152	Atxn7l3b	-4.135
A_30_P01026009	Unknown	chr8:19682258-19700836_F	-4.132
A_51_P439403	ref|NM_011059|ens|ENSMUST00000026378|gb|AB013848|gb|AK037182	Padi1	-4.132
A_55_P1959379	ref|NM_001007579|ens|ENSMUST00000105774|gb|BC080695	BC080695	-4.132
A_51_P351481	ref|NM_019937|ens|ENSMUST00000149729|ens|ENSMUST00000142153|ens|ENSMUST00000135719	Ccnl1	-4.13
A_66_P108815	ref|NM_025396|ens|ENSMUST00000034264|ens|ENSMUST00000123240|ens|ENSMUST00000127626	Pgls	-4.127
A_52_P408391	ref|NM_010894|ens|ENSMUST00000088056|ens|ENSMUST00000041099|gb|U28068	Neurod1	-4.127
A_30_P01024130	Unknown	chr13:49488457-49493732_F	-4.127
A_52_P92514	ens|ENSMUST00000029315|gb|AK171787|gb|BC052702|gb|DT926074	Fam48a	-4.127
A_52_P429265	ref|NM_027805|gb|AK018403|gb|AK084684|tc|TC1583874	Ppp6r2	-4.124
A_55_P2023902	ref|NM_010251|ens|ENSMUST00000031121|gb|AK141571|gb|AK137354	Gabra4	-4.124
A_55_P1995127	Unknown	A_55_P1995127	-4.124
A_52_P639774	ens|ENSMUST00000120450|gb|AK168445|gb|U01023|tc|TC1583184	Gart	-4.121
A_55_P2024649	ref|NM_025683|ens|ENSMUST00000142920|ens|ENSMUST00000027157|gb|AK088152	Rpe	-4.121
A_30_P01018129	Unknown	chr19:23068397-23190256_R	-4.115
A_55_P2022539	Unknown	A_55_P2022539	-4.115
A_65_P15340	ref|NM_001007568|ens|ENSMUST00000080406|gb|AK153967|gb|AK140082	Zfp251	-4.112
A_51_P478003	ref|NM_172555|ens|ENSMUST00000020513|gb|AK035810|gb|BC023030	Papolg	-4.112
A_52_P436590	ref|NM_145218|gb|BC158110|gb|BC052469|gb|BC069177	Wbscr17	-4.11
A_55_P2003586	ref|NM_001197024|ref|NM_028789|ens|ENSMUST00000115158|ens|ENSMUST00000015271	Unkl	-4.107
A_52_P122843	ref|NM_001100452|ens|ENSMUST00000040624|gb|AB093219|gb|AK133487	BC032203	-4.104
A_52_P222026	ref|NM_009602|ens|ENSMUST00000029562|gb|BC065103|tc|TC1605007	Chrnb2	-4.104
A_51_P304125	ref|NM_007854|ens|ENSMUST00000025826|gb|AF183397|gb|AK010950	Slc29a2	-4.101
A_55_P2132671	ens|ENSMUST00000163080|nap|NAP061827-1	ENSMUST00000163080	-4.098
A_52_P493810	ref|NM_016795|ens|ENSMUST00000004987|gb|AK151152|gb|AK015754	Srpk1	-4.095
A_51_P140819	ref|NM_001110016|ref|NM_001110015|ens|ENSMUST00000166214|ens|ENSMUST00000053663	Wdr36	-4.095
A_52_P74524	ref|XR_035387|ref|XR_035443|gb|AK038227|riken|A130088E03	Gm9734	-4.095
A_55_P2172274	ref|NM_008017|ens|ENSMUST00000102915|ens|ENSMUST00000117280|ens|ENSMUST00000166805	Smc2	-4.095
A_30_P01031130	Unknown	chr13:94200051-94200598_R	-4.095
A_55_P1952828	Unknown	A_55_P1952828	-4.093
A_51_P264084	ref|NM_029781|ens|ENSMUST00000020391|ens|ENSMUST00000147802|gb|AK038445	Rab36	-4.093
A_51_P167232	ref|NM_009806|ens|ENSMUST00000115438|ens|ENSMUST00000116623|ens|ENSMUST00000115436	Cask	-4.093
A_55_P2066927	ens|ENSMUST00000108038|gb|AK088379|tc|TC1599878|riken|E430014F02	Galt	-4.093
A_52_P424767	ref|NM_009030|ens|ENSMUST00000102598|gb|AK082419|tc|TC1601862	Rbbp4	-4.087
A_51_P109295	ref|NM_053128|ens|ENSMUST00000051754|gb|AF326296|gb|AK030570	Pcdhb3	-4.087
A_51_P348665	ref|NM_016894|ens|ENSMUST00000097648|gb|AF209904|gb|BC012644	Ramp1	-4.087
A_30_P01027703	Unknown	chr18:36072785-36076426_F	-4.087
A_51_P473953	ref|NM_001081295|ens|ENSMUST00000079300|gb|AK144976|gb|AK018464	Arhgef26	-4.087
A_52_P198898	ref|NM_177271|ens|ENSMUST00000100070|gb|AK045645|gb|AK087498	Samd5	-4.087
A_55_P2131353	ref|NM_025419|ens|ENSMUST00000035154|gb|AK004312|gb|AK220157	1110059G10Rik	-4.084
A_55_P2173224	ref|NM_008442|ref|NM_001145779|ens|ENSMUST00000122233|ens|ENSMUST00000042181	Kif2a	-4.081
A_51_P472621	ref|NM_172482|gb|AK083143|gb|AK086285|ens|ENSMUST00000058104	Zfp719	-4.081
A_55_P2209273	ens|ENSMUST00000129924|gb|AK006879|tc|TC1695877|riken|1700064E03	ENSMUST00000129924	-4.081
A_55_P2062632	ref|NM_001252684|ref|NM_153808|ref|NM_001252685|ens|ENSMUST00000036334	Smc5	-4.078
A_55_P2097814	ref|NM_146288|ens|ENSMUST00000119082|gb|BC156657|ens|ENSMUST00000172582	Olfr122	-4.078
A_30_P01018086	Unknown	chr2:181663381-181664097_F	-4.078
A_51_P190111	ref|NM_008566|ens|ENSMUST00000005545|ens|ENSMUST00000164309|gb|D26090	Mcm5	-4.076
A_51_P322542	ref|NM_027444|ens|ENSMUST00000138166|ens|ENSMUST00000114489|gb|AK131987	Bbx	-4.076
A_52_P649817	ref|NM_031252|ens|ENSMUST00000026449|gb|AK043894|gb|AF301619	Il23a	-4.073
A_65_P08521	ref|NM_001136081|ref|NM_182990|ens|ENSMUST00000145097|ens|ENSMUST00000168266	Ssrp1	-4.073
A_52_P498193	ref|NM_153543|ens|ENSMUST00000020497|gb|AK141954|gb|BC034531	Aldh1l2	-4.073
A_55_P2052166	ref|NM_029332|ens|ENSMUST00000065516|ens|ENSMUST00000166315|ens|ENSMUST00000171822	Akap13	-4.073
A_52_P96782	ref|NM_028459|ref|NM_001167745|ens|ENSMUST00000041737|ens|ENSMUST00000031695	Wasl	-4.073
A_51_P154933	ref|NM_133967|ens|ENSMUST00000034280|gb|AK170639|gb|AK172462	Zdhhc7	-4.073
A_52_P244193	ref|NM_009846|ens|ENSMUST00000058714|gb|AK014279|gb|AK169613	Cd24a	-4.07
A_51_P153557	ref|NM_175199|ens|ENSMUST00000066285|gb|AB093239|gb|AK141925	Hspa12a	-4.07
A_55_P1978013	ref|NM_008754|ens|ENSMUST00000088201|gb|AK017455|tc|TC1582062	Obp1a	-4.07
A_51_P135517	ref|NM_007728|ref|NM_001198835|ens|ENSMUST00000085412|ens|ENSMUST00000164782	Coch	-4.07
A_51_P394728	ref|NM_029571|ens|ENSMUST00000102738|gb|AK150178|gb|AK003197	Kti12	-4.07
A_65_P18433	ref|NM_001024604|ens|ENSMUST00000014640|gb|BC094609|gb|BC051456	Ankrd28	-4.07
A_55_P1953439	ref|NM_001081193|ens|ENSMUST00000119944|gb|AK140538|gb|AK164006	Lemd3	-4.067
A_30_P01031338	Unknown	chr1:64686823-64728598_R	-4.067
A_51_P315734	ref|NM_008781|ens|ENSMUST00000087086|gb|AK144973|gb|X59358	Pax3	-4.067
A_55_P2043762	ref|NM_026366|ref|NM_001159331|ens|ENSMUST00000054442|gb|AY456393	N6amt1	-4.067
A_51_P257684	ref|NM_011490|ref|NM_001109906|ref|NM_001109905|ens|ENSMUST00000109236	Stau1	-4.064
A_55_P1985288	ref|NM_177182|ens|ENSMUST00000056184|ens|ENSMUST00000104940|gb|BC048728	Bhlha9	-4.064
A_30_P01020072	Unknown	chr7:128341797-128414692_R	-4.061
A_55_P2121081	ref|NM_029402|ens|ENSMUST00000080089|ens|ENSMUST00000159443|ens|ENSMUST00000162301	Cul2	-4.061
A_55_P2106440	Unknown	A_55_P2106440	-4.061
A_55_P2029581	Unknown	A_55_P2029581	-4.061
A_30_P01032305	Unknown	chr8:48476637-48492537_F	-4.059
A_55_P1975447	nap|NAP111403-1	NAP111403-1	-4.059
A_51_P117109	ref|NM_173751|ens|ENSMUST00000105384|gb|AK207645|gb|AK213840	Ilvbl	-4.059
A_51_P448178	ref|NM_175519|ens|ENSMUST00000054095|gb|AK047519|gb|AK043351	Kctd8	-4.059
A_51_P438701	ref|NM_145427|ens|ENSMUST00000045675|ens|ENSMUST00000108721|gb|BC013607	Atpaf2	-4.059
A_55_P1957373	ref|NM_026176|ens|ENSMUST00000112940|ens|ENSMUST00000009174|gb|AK004704	Pdcl	-4.056
A_55_P2048454	ref|NM_008503|ens|ENSMUST00000122809|ens|ENSMUST00000152407|ens|ENSMUST00000169678	Rps2	-4.056
A_51_P505967	ref|NM_015773|ens|ENSMUST00000023468|gb|BC090660|gb|BC100455	Spag6	-4.053
A_55_P2109057	ref|NM_177354|ens|ENSMUST00000021681|ens|ENSMUST00000168569|gb|AK090166	Vash1	-4.05
A_51_P418016	ref|NM_172839|ens|ENSMUST00000025983|gb|AK052506|gb|AK157841	Ccnj	-4.05
A_51_P165098	ref|NM_028758|ens|ENSMUST00000144779|ens|ENSMUST00000124566|ens|ENSMUST00000033160	Gga2	-4.05
A_51_P457331	ref|NM_016710|ens|ENSMUST00000033597|gb|AK146755|gb|AK162478	Hmgn5	-4.05
A_55_P2044922	ref|NM_175669|ens|ENSMUST00000053659|gb|AK033761|tc|TC1591937	Gpr82	-4.047
A_30_P01026399	Unknown	chr17:33368400-33393525_F	-4.047
A_55_P1996751	nap|NAP102295-1|nap|NAP111067-1|nap|NAP112240-1	NAP102295-1	-4.045
A_51_P214343	ref|NM_175400|ens|ENSMUST00000115019|ens|ENSMUST00000027973|gb|AK053638	Sephs1	-4.045
A_52_P681488	ref|NM_026343|ens|ENSMUST00000107720|gb|AK018158|gb|AK154503	Stx17	-4.042
A_30_P01028194	Unknown	chr10:62267317-62269871_R	-4.042
A_30_P01026733	Unknown	chr6:95418306-95424131_R	-4.039
A_51_P248705	ref|NM_023565|ens|ENSMUST00000171410|ens|ENSMUST00000145819|ens|ENSMUST00000169290	Cse1l	-4.039
A_51_P479902	ref|NM_001003913|ref|NM_001171582|ens|ENSMUST00000139683|ens|ENSMUST00000037290	Mars	-4.039
A_55_P2139089	ref|NM_001013820|ref|NM_177002|ens|ENSMUST00000065651|ens|ENSMUST00000096269	Slc22a28	-4.039
A_55_P2085075	ref|NM_008178|ens|ENSMUST00000065382|gb|U21224|tc|NP381074	Gsx1	-4.039
A_51_P453010	ref|NM_026758|ens|ENSMUST00000034303|gb|AK003245|gb|BC069961	Mphosph6	-4.036
A_51_P446085	ref|NM_028908|ens|ENSMUST00000170560|ens|ENSMUST00000053078|gb|AK080043	4933403G14Rik	-4.036
A_55_P2086087	ref|XM_003085500|nap|NAP112565-1|nap|NAP093899-001|nap|NAP093977-001	Rpl17-ps1	-4.036
A_52_P578043	ens|ENSMUST00000119943|gb|AK173011|tc|TC1597367|nap|NAP031971-1	Sacs	-4.036
A_51_P173692	ref|NM_177250|ens|ENSMUST00000050975|gb|AK040952|tc|TC1590760	Lingo4	-4.036
A_51_P511060	ref|NM_030165|ens|ENSMUST00000125531|ens|ENSMUST00000049344|gb|AK145992	Csgalnact2	-4.036
A_51_P415905	ref|NM_008892|ens|ENSMUST00000006856|gb|D17384|gb|D13543	Pola1	-4.033
A_55_P2047932	ref|NM_024195|ens|ENSMUST00000050631|ens|ENSMUST00000113151|ens|ENSMUST00000168643	Cyb5r4	-4.033
A_55_P2285782	gb|AK039976|tc|TC1595134|riken|A430038C16|nap|NAP023613-001	A630038E17Rik	-4.033
A_52_P214752	ens|ENSMUST00000067795|gb|AK155007|gb|AK129442|gb|AK014072	Lcor	-4.033
A_30_P01025088	Unknown	chr16:17833211-17835112_F	-4.031
A_52_P558699	ref|NM_211355|ref|NM_001160214|ens|ENSMUST00000163095|ens|ENSMUST00000048305	Smek1	-4.031
A_51_P487501	ens|ENSMUST00000038658|ens|ENSMUST00000055261|gb|AK167515|gb|AK160521	Mob1a	-4.031
A_55_P2217309	gb|AK082718|riken|C230094P03|nap|NAP084936-1	LOC545198	-4.028
A_55_P2042783	ens|ENSMUST00000161216|gb|AK010164|tc|TC1704219|riken|2310075C17	ENSMUST00000161216	-4.028
A_66_P114797	ens|ENSMUST00000101402|gb|AK145307|ens|ENSMUST00000161723|tc|TC1593183	ENSMUST00000101402	-4.028
A_51_P286865	ref|NM_001170966|gb|BC064745|gb|AK003256|gb|BC011156	Wdr33	-4.025
A_55_P2086033	nap|NAP114452-1	NAP114452-1	-4.025
A_55_P2102816	ref|NM_019865|ens|ENSMUST00000081987|ens|ENSMUST00000152266|ens|ENSMUST00000149857	Rpl36a	-4.022
A_55_P1997410	ens|ENSMUST00000051531|gb|AK144547|gb|AK135569|riken|G630093O12	Exoc6b	-4.022
A_51_P514675	ref|NM_026479|ens|ENSMUST00000018383|gb|AK169856|gb|BC025078	Zcchc10	-4.022
A_30_P01024965	Unknown	chr16:94055900-94120575_R	-4.022
A_55_P2150377	gb|AK136433|tc|TC1619575|riken|9030204C09	AK136433	-4.022
A_52_P98625	ref|NM_172939|gb|AK050497|tc|TC1633487|tc|TC1776705	Sowahc	-4.019
A_55_P1956403	ref|NM_183283|gb|AK009281|ens|ENSMUST00000093183|gb|BY657668	2310010M20Rik	-4.019
A_52_P555723	ref|NM_018871|ens|ENSMUST00000055808|gb|AK088847|gb|AK164356	Ywhag	-4.017
A_51_P439085	ref|NM_023516|ref|NM_001190461|gb|AF141311|gb|AK009377	Hilpda	-4.017
A_55_P2095854	ref|NM_023852|ens|ENSMUST00000022210|ens|ENSMUST00000167824|gb|AK148904	Rab3c	-4.017
A_55_P1962035	ref|NM_198006|ens|ENSMUST00000027286|gb|AK169639|gb|AK075747	6330578E17Rik	-4.017
A_51_P157083	ref|NM_008086|ens|ENSMUST00000109819|ens|ENSMUST00000065086|gb|X65128	Gas1	-4.017
A_55_P2061701	ref|NM_133676|ens|ENSMUST00000162850|ens|ENSMUST00000160890|ens|ENSMUST00000006452	Osgep	-4.014
A_55_P2143184	ref|NM_153087|ens|ENSMUST00000041676|gb|AF358859|tc|NP538209	Hrh4	-4.014
A_30_P01022389	Unknown	chr18:63363388-63365434_R	-4.014
A_52_P483301	ref|NM_145374|ens|ENSMUST00000161134|ens|ENSMUST00000160265|gb|BC025652	Mios	-4.014
A_55_P1969131	ref|NM_178373|ens|ENSMUST00000032416|ens|ENSMUST00000113089|gb|AK080133	Cidec	-4.011
A_55_P1985304	ref|NM_023860|ref|NM_027844|ens|ENSMUST00000084415|ens|ENSMUST00000084414	Krtap5-3	-4.011
A_51_P240723	ref|NR_003953|gb|AK006230|gb|AV047638|tc|TC1679691	1700022A21Rik	-4.011
A_30_P01025658	Unknown	chr15:85412264-85549139_F	-4.008
A_52_P474152	ref|NM_139226|ens|ENSMUST00000051773|gb|BC058700	Onecut3	-4.008
A_55_P2097736	ref|NM_019574|ref|NM_001253691|ref|NM_001253690|ref|NR_045108	Patz1	-4.008
A_65_P12104	ref|NM_198967|ens|ENSMUST00000060095|gb|AK135908|ens|ENSMUST00000100772	Tmtc1	-4.008
A_51_P151835	ref|NM_001110013|ens|ENSMUST00000058154|gb|AK018618|riken|9130014E20	Tmtc3	-4.008
A_55_P2098226	ref|NM_181344|ens|ENSMUST00000049124|gb|AK162497|gb|AK133495	C1rl	-4.006
A_55_P2155574	ens|ENSMUST00000077660|tc|TC1778878|nap|NAP000013-001|nap|NAP061297-1	ENSMUST00000077660	-4.006
A_55_P2141889	nap|NAP019092-001	NAP019092-001	-4.006
A_66_P128608	ref|NM_028428|ens|ENSMUST00000048016|gb|AK029717|gb|AK030310	Fut11	-4.003
A_55_P2117333	Unknown	A_55_P2117333	-4.003
A_55_P2357860	gb|AK160262|riken|4933415E08|nap|NAP018697-001	4933415E08Rik	-4.003
A_52_P641367	ref|NM_134095|ens|ENSMUST00000152227|ens|ENSMUST00000146628|gb|AK208559	Pppde2	-4.003
A_51_P473888	ref|NM_010560|ens|ENSMUST00000070731|gb|AK017211|gb|BC009665	Il6st	-4.003
A_55_P2170034	ref|NM_016846|ens|ENSMUST00000027760|gb|AK173071|gb|BC017678	Rgl1	-4
A_55_P2113071	ref|NM_153177|ens|ENSMUST00000084285|ens|ENSMUST00000084286|ens|ENSMUST00000084289	Eif2c4	-3.997
A_52_P330540	ref|NM_025642|ens|ENSMUST00000129171|ens|ENSMUST00000099554|gb|AK014084	2610039C10Rik	-3.997
A_30_P01031483	Unknown	chr15:62046023-62082530_F	-3.997
A_55_P2051334	ref|NR_004446|ref|XM_003086924|ref|XM_003086925|ref|XM_003086922	H2-K2	-3.994
A_66_P138999	ens|ENSMUST00000125381|gb|AK138854|tc|TC1668116|tc|TC1781327	Plxna2	-3.994
A_55_P2070174	tc|TC1603041	TC1603041	-3.994
A_55_P1979973	ref|NM_001195025|ref|NM_028778|ens|ENSMUST00000072177|ens|ENSMUST00000082125	Nuak2	-3.994
A_66_P109183	ref|NM_001109914|ens|ENSMUST00000167323|gb|AK085884|riken|D830023L12	Apold1	-3.992
A_55_P2098335	ref|NM_009157|ens|ENSMUST00000046963|gb|AK044534|gb|AK044698	Map2k4	-3.992
A_55_P2041310	ens|ENSMUST00000111990|ens|ENSMUST00000001867|gb|BC061467|tc|TC1589422	Evx2	-3.992
A_51_P432199	ref|NM_021788|ens|ENSMUST00000034022|gb|BC132081|gb|BC132087	Sap30	-3.992
A_51_P243914	ref|NM_018773|ens|ENSMUST00000078214|gb|AB014485|gb|AK076000	Skap2	-3.989
A_55_P1955412	ref|NM_011393|ens|ENSMUST00000154446|ens|ENSMUST00000111212|ens|ENSMUST00000111213	Slc1a2	-3.989
A_51_P284988	ref|NM_001036293|ens|ENSMUST00000172012|ens|ENSMUST00000077839|gb|AK002810	Nrbf2	-3.989
A_30_P01021331	Unknown	chrX:75813213-75829323_R	-3.989
A_51_P356055	ref|NM_175012|ens|ENSMUST00000025395|gb|AK133508|gb|BC024515	Grp	-3.989
A_55_P2372897	gb|AK141983|riken|D130081C24	5730480H06Rik	-3.986
A_30_P01021251	Unknown	chr14:77006215-77063293_R	-3.986
A_55_P2046699	ref|NM_026210|ens|ENSMUST00000014321|gb|AK017572|gb|AK077277	Fam18b	-3.983
A_30_P01033314	Unknown	chr13:70745633-70776516_R	-3.981
A_52_P36928	ref|NM_194269|ens|ENSMUST00000061703|gb|BC037365|gb|AY367765	Morn2	-3.981
A_55_P2031501	ref|NM_146130|ref|NM_053263|ref|NR_033513|ens|ENSMUST00000111964	Hnrnpa3	-3.981
A_55_P1961436	ref|NM_011101|ens|ENSMUST00000100302|ens|ENSMUST00000059595|gb|M25811	Prkca	-3.981
A_52_P42380	ref|NM_201359|ref|NM_001252153|ens|ENSMUST00000064200|gb|AK219803	Tmem106c	-3.981
A_51_P347619	ref|NM_028462|ens|ENSMUST00000031709|gb|BC049157|gb|AK014242	Fezf1	-3.981
A_55_P2051124	ref|NM_001008422|ens|ENSMUST00000117282|ens|ENSMUST00000148227|ens|ENSMUST00000085383	Scaf1	-3.978
A_52_P96748	ref|NM_028235|ens|ENSMUST00000099996|gb|AK011097|gb|BC157929	Ttc30b	-3.975
A_55_P2090364	ens|ENSMUST00000113749|ens|ENSMUST00000141412|ens|ENSMUST00000067916|gb|AK083793	Plcd4	-3.972
A_52_P159395	ref|NM_001081402|ens|ENSMUST00000045766|gb|AK159714|gb|AK160933	Wdr70	-3.972
A_51_P492346	ref|NM_026685|ens|ENSMUST00000050389|gb|AK002365|gb|AK057630	Tmem174	-3.972
A_52_P1128182	gb|BC023829|gb|AK207538|gb|AK197085|gb|AK207995	BC023829	-3.97
A_55_P2219657	ref|NM_001081111|gb|AK136794|tc|TC1660299|riken|9330016E10	Tmf1	-3.97
A_30_P01022120	Unknown	chr13:22110479-22116629_R	-3.97
A_55_P2008895	ref|NM_001081983|ref|NM_207267|ens|ENSMUST00000113071|ens|ENSMUST00000127404	Tmsb15b1	-3.964
A_30_P01027342	Unknown	chr8:80056549-80067162_R	-3.964
A_55_P2001891	ref|NM_021463|ens|ENSMUST00000033809|gb|AK165524|gb|AB025048	Prps1	-3.964
A_52_P412529	ref|NM_020593|gb|AF233226|gb|AK006392|gb|AK176959	Fbxo3	-3.964
A_55_P2020054	gb|AK164572|tc|TC1671707|riken|D430003N19	2610035D17Rik	-3.964
A_55_P2013118	tc|TC1694992	TC1694992	-3.964
A_30_P01031295	Unknown	chr18:84735774-84760824_F	-3.961
A_51_P298486	ref|NM_026225|ens|ENSMUST00000036665|gb|AK031149|gb|BC071236	Cog6	-3.961
A_30_P01025751	Unknown	chr6:82268824-82272977_R	-3.961
A_52_P368384	ref|NM_028712|ens|ENSMUST00000049064|gb|AK048795|gb|AK045030	Rap2b	-3.961
A_52_P40241	ref|NM_001163475|ens|ENSMUST00000073124|gb|AK156312|gb|AK013039	Zfp746	-3.961
A_55_P2113650	ref|NM_029556|ens|ENSMUST00000110684|ens|ENSMUST00000026625|gb|AK002741	Clybl	-3.959
A_52_P1077588	ref|NM_145432|ens|ENSMUST00000001002|gb|AK136845|gb|AK138219	Heatr6	-3.959
A_51_P304683	ref|NM_011802|ref|NM_001044389|ens|ENSMUST00000015501|ens|ENSMUST00000113824	Clpx	-3.959
A_51_P138879	ref|NM_144894|ref|NM_001048148|ens|ENSMUST00000108807|ens|ENSMUST00000029105	Zgpat	-3.959
A_55_P2134979	ref|XM_003085889|ref|XM_884320|nap|NAP113769-1|nap|NAP113826-1	Gm6115	-3.956
A_55_P2094499	ref|NM_177887|ens|ENSMUST00000086364|gb|AK041846|riken|A630041N19	Tmem150b	-3.956
A_55_P2149873	ref|NM_178684|ens|ENSMUST00000043494|ens|ENSMUST00000166743|ens|ENSMUST00000164235	Mapk1ip1l	-3.956
A_55_P2111429	ref|NM_027453|ens|ENSMUST00000102741|ens|ENSMUST00000102739|ens|ENSMUST00000102740	Btf3l4	-3.956
A_66_P101519	ref|NM_021041|ref|NM_001044720|ref|NM_021042|ref|NM_011511	Abcc9	-3.956
A_55_P1993609	ref|NM_028201|ref|NM_001038641|ens|ENSMUST00000028737|gb|AK010392	2210009G21Rik	-3.956
A_30_P01023874	Unknown	chr8:111766396-111772271_R	-3.953
A_51_P297105	ref|NM_011671|ens|ENSMUST00000126534|gb|AF111998|gb|U94593	Ucp2	-3.953
A_55_P2202029	gb|AK041257|riken|A530095A18	AK041257	-3.953
A_55_P2056533	ref|NM_008746|ens|ENSMUST00000039431|gb|AY336094|tc|TC1648787	Ntrk3	-3.953
A_30_P01018366	Unknown	chr4:33367670-33368135_R	-3.953
A_55_P1994492	ref|NM_001033173|ens|ENSMUST00000046929|gb|AK135148|gb|AK122466	Usp31	-3.95
A_55_P2072816	ref|NM_177751|ens|ENSMUST00000026750|gb|AK122399|gb|BC043093	Cnksr2	-3.95
A_55_P2117487	Unknown	A_55_P2117487	-3.948
A_55_P2064038	Unknown	A_55_P2064038	-3.948
A_55_P2452259	ref|NM_001113383|gb|AK048072|gb|AK049883|gb|AK173039	Gls	-3.948
A_51_P493117	ref|NM_025807|ens|ENSMUST00000046807|gb|AK004556|tc|TC1642919	Slc16a9	-3.948
A_55_P2122588	ref|NM_001177374|ref|NM_146078|ens|ENSMUST00000113335|ens|ENSMUST00000113337	Ubr2	-3.948
A_51_P307168	ref|NM_026993|ens|ENSMUST00000029845|gb|BC060266|gb|AK149185	Ddah1	-3.945
A_55_P2060663	ref|XM_915945	Gm14407	-3.945
A_51_P267544	ref|NM_013522|ens|ENSMUST00000033999|gb|U62105|gb|AK038143	Frg1	-3.945
A_66_P109673	ens|ENSMUST00000136960|gb|AK156499|gb|AV245905|tc|TC1731371	Sh2b3	-3.942
A_51_P481821	ref|NM_029701|ens|ENSMUST00000067476|ens|ENSMUST00000152597|gb|AK048051	Spcs3	-3.942
A_52_P349694	ref|NM_201244|ens|ENSMUST00000049966|gb|AK080451|gb|AK018151	Copg	-3.942
A_51_P220934	ref|NM_026955|ens|ENSMUST00000034413|gb|AK008621|gb|AK034938	2200002K05Rik	-3.942
A_52_P316644	ref|NM_009748|ens|ENSMUST00000049166|gb|AK078796|gb|BC005572	Bet1	-3.942
A_51_P230287	ref|NM_030889|ens|ENSMUST00000037370|gb|AY004316|gb|BC022668	Sorcs2	-3.939
A_52_P122673	ref|NM_031998|ens|ENSMUST00000140211|ens|ENSMUST00000165636|ens|ENSMUST00000031810	Tsga14	-3.939
A_51_P421303	ref|NM_026769|ref|NM_001190386|ref|NM_001190385|ens|ENSMUST00000166758	Caly	-3.939
A_55_P2161077	nap|NAP111447-1	NAP111447-1	-3.939
A_55_P2329680	gb|AK149371|tc|TC1663782|riken|C730001P21	Dyrk2	-3.937
A_55_P2013591	Unknown	A_55_P2013591	-3.937
A_55_P2062084	gb|AK167004|riken|I1C0027E24	AK167004	-3.934
A_55_P1986907	ref|NM_008899|ref|XM_003084564|ref|XM_003086346|gb|AK039117	Pou3f2	-3.934
A_51_P276939	ref|NM_198101|ens|ENSMUST00000036074|gb|AK019874|gb|AK172438	Gmip	-3.934
A_52_P250590	ref|NM_001163026|ens|ENSMUST00000035170|gb|AK142362|gb|AB093258	Dnajc13	-3.931
A_51_P402435	ref|NM_026508|ens|ENSMUST00000167637|ens|ENSMUST00000006137|gb|AK088471	Trap1	-3.931
A_52_P25251	ref|NM_178756|ens|ENSMUST00000076670|ref|XR_107592|gb|AK034251	E130309F12Rik	-3.931
A_30_P01026434	Unknown	chr10:83181374-83249918_F	-3.931
A_55_P1987222	ens|ENSMUST00000120034	1810014F10Rik	-3.931
A_51_P476261	ref|NM_181266|ref|NM_023266|ens|ENSMUST00000122859|ens|ENSMUST00000089207	Zfp120	-3.929
A_30_P01030964	Unknown	chrX:58343629-58372091_F	-3.929
A_55_P2027212	ref|XM_003086011|ref|XM_978919	Gm7303	-3.926
A_51_P277718	ref|NM_007683|ens|ENSMUST00000031170|gb|BC150700|gb|U03113	Cenpc1	-3.926
A_51_P175580	ref|NM_021897|ref|NM_001199105|ens|ENSMUST00000132010|ens|ENSMUST00000029865	Trp53inp1	-3.926
A_66_P115443	ref|NM_080557|ens|ENSMUST00000023502|gb|BC016599|gb|BC006043	Snx4	-3.926
A_51_P483261	ref|NM_145145|ens|ENSMUST00000129163|ens|ENSMUST00000036473|gb|AY007238	Pomt1	-3.926
A_30_P01023356	Unknown	chr16:11024315-11055740_F	-3.926
A_55_P1979356	ref|NM_001039147|ref|NM_024431|ens|ENSMUST00000085248|ens|ENSMUST00000169860	Morf4l1	-3.923
A_55_P2056344	ref|NM_001142539|ens|ENSMUST00000070059|gb|BC151195|gb|BC139460	Gm9992	-3.923
A_51_P232705	ref|NM_029635|ens|ENSMUST00000028584|gb|AK007640|gb|AK154731	Commd9	-3.92
A_55_P2125862	ens|ENSMUST00000114659|tc|TC1710962	0610007C21Rik	-3.918
A_52_P401311	ens|ENSMUST00000165691|nap|NAP102430-1|nap|NAP111798-1	ENSMUST00000165691	-3.915
A_51_P210350	ref|NM_182959|ens|ENSMUST00000099372|ens|ENSMUST00000020102|gb|AF510321	Slc17a8	-3.912
A_55_P2012096	ref|NM_001256019|ref|NM_007558|ens|ENSMUST00000102641|gb|AK157978	Bmp8a	-3.912
A_52_P110088	ref|NM_023247|ens|ENSMUST00000074208|gb|AK005252|gb|AF235017	Ndufaf3	-3.912
A_52_P264902	ref|NM_008929|ens|ENSMUST00000022734|gb|AK148270|gb|AK146097	Dnajc3	-3.912
A_51_P357207	ref|NM_001081144|ref|NM_001177902|ens|ENSMUST00000057258|gb|AK173245	Zfp518b	-3.912
A_30_P01025343	Unknown	chr7:77323753-77482708_R	-3.91
A_30_P01018404	Unknown	chr13:83860985-84012285_F	-3.91
A_30_P01022316	Unknown	chr2:179984199-179984669_R	-3.91
A_30_P01025916	Unknown	chr6:86776350-86799379_R	-3.91
A_52_P272054	nap|NAP000003-013	NAP000003-013	-3.91
A_55_P2326507	gb|AK079103|gb|BB538556|riken|9330195C05	A630057N01Rik	-3.907
A_52_P429774	ref|NM_146105|ens|ENSMUST00000040706|gb|AK036332|gb|AK146681	Cnst	-3.907
A_55_P2153904	ens|ENSMUST00000080170|ens|ENSMUST00000170499|nap|NAP095054-001|nap|NAP095065-001	Gm6132	-3.904
A_55_P1976908	ref|NM_001195258|ens|ENSMUST00000145165|ref|XM_001472462|ref|XM_003084755	Gm14378	-3.901
A_55_P2033480	ref|NM_001085530|ref|NR_033506|ens|ENSMUST00000108026|ens|ENSMUST00000115912	Gm13298	-3.901
A_65_P19458	ref|NM_009072|ens|ENSMUST00000116446|ens|ENSMUST00000020904|ens|ENSMUST00000168024	Rock2	-3.901
A_55_P2069729	ref|NM_024180|ens|ENSMUST00000116228|ens|ENSMUST00000026409|gb|AK013455	Ormdl2	-3.899
A_55_P1956017	ref|NM_152825|ens|ENSMUST00000040429|ens|ENSMUST00000065111|ens|ENSMUST00000137293	Usp45	-3.899
A_51_P465148	ref|NM_007798|ens|ENSMUST00000006235|gb|AK147192|gb|AK083393	Ctsb	-3.899
A_52_P473419	ref|NM_013512|ens|ENSMUST00000025234|gb|BC011099|gb|BB791182	Epb4.1l4a	-3.899
A_51_P403049	ref|NM_001081179|ens|ENSMUST00000097281|ens|ENSMUST00000164698|gb|AK141783	Heatr5b	-3.899
A_55_P2161238	ref|NM_172706|ens|ENSMUST00000069538|gb|AK034358|gb|AK133610	9330182L06Rik	-3.899
A_66_P103198	gb|AK131883|tc|TC1737400|riken|2210017I01	2210017I01Rik	-3.896
A_55_P2266679	ref|NM_001013799|ens|ENSMUST00000159881|ens|ENSMUST00000162750|ens|ENSMUST00000061421	A530098C11Rik	-3.896
A_55_P2131433	Unknown	A_55_P2131433	-3.893
A_51_P490795	ref|NM_010751|ens|ENSMUST00000001184|gb|AK137548|gb|BC023792	Mxd1	-3.893
A_52_P86353	ref|NM_080644|ref|NM_001199301|ens|ENSMUST00000039071|ens|ENSMUST00000106742	Cacng5	-3.891
A_55_P2111713	ref|NM_001082548|ref|NM_011464|ens|ENSMUST00000108235|ens|ENSMUST00000108236	Spint2	-3.888
A_55_P1956534	ref|NM_033605|ens|ENSMUST00000067219|gb|AK042401|gb|AF257217	Dach2	-3.888
A_30_P01022232	Unknown	chr13:29106280-29120376_F	-3.888
A_52_P274028	ref|NM_025965|ens|ENSMUST00000021864|gb|AK078039|tc|TC1637257	Ssr1	-3.888
A_30_P01027831	Unknown	chr12:89448550-89461843_R	-3.885
A_52_P68221	ref|NM_016886|ens|ENSMUST00000139965|ens|ENSMUST00000076349|gb|AK013750	Gria3	-3.885
A_52_P232580	ref|NM_145508|ens|ENSMUST00000016670|gb|AK161495|gb|BC006704	Dyrk3	-3.885
A_55_P2013913	ref|NM_008779|ens|ENSMUST00000032159|ens|ENSMUST00000168734|gb|AK140747	Cntn3	-3.883
A_55_P2099105	ref|NM_001252638|ref|NM_001252637|ref|NM_001081347|ref|NM_001252636	Rhobtb1	-3.883
A_52_P494930	ref|NM_001162999|ens|ENSMUST00000076136|gb|AK141700|gb|AK122512	Fnip2	-3.883
A_52_P420712	ref|NM_001025309|ref|NM_144859|ens|ENSMUST00000172733|ens|ENSMUST00000172818	Pja2	-3.883
A_55_P2093634	ref|NM_001017966|ref|NM_023544|ens|ENSMUST00000105782|gb|BC150752	Ddi2	-3.88
A_30_P01029325	Unknown	chr13:28537223-28539860_R	-3.88
A_30_P01023128	Unknown	chr5:139225387-139230837_F	-3.88
A_55_P2152956	ref|NM_001039493|ens|ENSMUST00000097713|gb|AK039152|tc|TC1602991	Plekhm3	-3.88
A_51_P265495	ref|NM_010738|ens|ENSMUST00000023248|gb|J03636|gb|X04653	Ly6a	-3.877
A_55_P2129761	ref|NM_172487|ens|ENSMUST00000101059|gb|BC058349|gb|AK031947	Prrt3	-3.877
A_55_P1970027	ref|NM_001243712|ref|NM_008395|ens|ENSMUST00000109685|ens|ENSMUST00000164757	Itch	-3.877
A_30_P01018931	Unknown	chr2:176610409-176612864_F	-3.874
A_51_P354077	ref|NM_153153|ens|ENSMUST00000129543|ens|ENSMUST00000025079|ens|ENSMUST00000055015	Svil	-3.874
A_30_P01029007	Unknown	chr19:53517903-53540753_F	-3.874
A_51_P286792	ref|NM_031494|ref|NM_001160229|ens|ENSMUST00000159795|ens|ENSMUST00000033731	Zfp275	-3.874
A_55_P2032458	ref|XM_893730|gb|AK153670|riken|A630040F03	Gm6934	-3.872
A_55_P2192397	gb|AK171382|riken|F730115K06	A330023F24Rik	-3.872
A_51_P517096	ref|NM_011997|ref|NM_001122978|ens|ENSMUST00000029950|ens|ENSMUST00000108178	Casp8ap2	-3.869
A_52_P576442	ref|NM_146057|ens|ENSMUST00000044524|gb|AK152884|gb|AK169162	Dap	-3.869
A_30_P01033236	Unknown	chr3:96215885-96218756_R	-3.869
A_52_P411601	ref|NM_177821|ens|ENSMUST00000068387|gb|BC144976|gb|BC150681	Ep300	-3.866
A_55_P2094925	ref|NM_011157|ens|ENSMUST00000162161|ens|ENSMUST00000020271|ens|ENSMUST00000160987	Srgn	-3.866
A_52_P509185	ref|NM_207671|ens|ENSMUST00000113481|ens|ENSMUST00000113479|gb|BC150730	Zfp318	-3.866
A_51_P370050	ref|NM_013796|ref|NR_027804|ens|ENSMUST00000023911|gb|AK168830	Nagpa	-3.866
A_51_P260850	ref|NM_025771|ref|NM_001004357|ens|ENSMUST00000114641|gb|AK017341	Cntnap2	-3.866
A_51_P389864	ref|NM_178879|ens|ENSMUST00000093217|ens|ENSMUST00000136822|gb|BC120583	B3gnt9-ps	-3.864
A_55_P2019214	ens|ENSMUST00000120177|tc|TC1640169	Gstt1	-3.861
A_55_P2181419	ref|NM_013685|ref|NM_001083967|ens|ENSMUST00000078486|tc|TC1613124	Tcf4	-3.861
A_51_P251717	ref|NM_026304|gb|AK206361|gb|BC003916|gb|AK012166	l7Rn6	-3.861
A_66_P115116	ref|NM_133784|ref|NM_001168281|ens|ENSMUST00000120977|ens|ENSMUST00000029380	Wwtr1	-3.861
A_55_P1986665	ref|NM_146500|ens|ENSMUST00000076965|gb|BC104265|tc|TC1600447	Olfr319	-3.858
A_52_P604629	ref|NM_153287|ens|ENSMUST00000035101|gb|AK140213|gb|AK171658	Csrnp1	-3.858
A_55_P1969367	ref|NM_001163155|ref|NM_007736|ens|ENSMUST00000112930|ens|ENSMUST00000087358	Col4a5	-3.858
A_55_P2090441	ens|ENSMUST00000147034|gb|AK138849|riken|A430091A01	ENSMUST00000147034	-3.858
A_51_P316949	ref|NM_001111121|ens|ENSMUST00000147545|gb|AK012728|tc|TC1605432	Ccdc6	-3.856
A_55_P2149906	ens|ENSMUST00000097570|nap|NAP114238-1	Gm8618	-3.856
A_55_P2140002	ref|NM_134131|ref|NM_001177759|ens|ENSMUST00000145726|ens|ENSMUST00000115429	Tnfaip8	-3.853
A_55_P2030319	ref|NM_133197|ens|ENSMUST00000168768|ens|ENSMUST00000033478|ens|ENSMUST00000063507	Mcf2	-3.853
A_30_P01017899	Unknown	chr7:69088784-69089906_R	-3.853
A_30_P01023923	Unknown	chr12:110896603-110940553_F	-3.85
A_55_P2050366	ens|ENSMUST00000146581|ens|ENSMUST00000139652|gb|AK051435|gb|BC028536	ENSMUST00000146581	-3.85
A_55_P2203478	ref|NM_021544|ref|NM_001253860|ens|ENSMUST00000065196|ens|ENSMUST00000117911	Scn5a	-3.85
A_55_P2129523	ref|XR_033994|tc|TC1660417|nap|NAP058568-1	Gm9519	-3.85
A_55_P2010332	ref|NM_007968|ens|ENSMUST00000073308|ens|ENSMUST00000079949|gb|AK034755	Ewsr1	-3.848
A_55_P2028804	ref|NM_016723|ens|ENSMUST00000002289|gb|BC029242|gb|AB033370	Uchl3	-3.848
A_55_P2010106	Unknown	A_55_P2010106	-3.848
A_51_P446417	ref|NM_026194|ens|ENSMUST00000038705|ens|ENSMUST00000102994|gb|BC132195	1810074P20Rik	-3.845
A_55_P2232155	gb|AK047872|tc|TC1597921|riken|C130018B16	D930019F10Rik	-3.845
A_55_P2364315	gb|AK051948|tc|TC1598137|riken|D230022F05	D030002E05Rik	-3.842
A_55_P2048588	ref|NM_007659|ens|ENSMUST00000119827|ens|ENSMUST00000020099|gb|U58633	Cdk1	-3.84
A_55_P1993719	ref|NM_026798|ens|ENSMUST00000025569|gb|AK003740|gb|BC052053	Tmem216	-3.837
A_51_P255456	ref|NM_009994|ens|ENSMUST00000024894|ens|ENSMUST00000164905|gb|U03283	Cyp1b1	-3.837
A_55_P2110177	nap|NAP114740-1	NAP114740-1	-3.834
A_51_P268167	ref|NM_001114879|ref|NM_028945|ens|ENSMUST00000059031|ens|ENSMUST00000022450	D14Abb1e	-3.834
A_51_P177691	ref|NM_008075|ens|ENSMUST00000163165|ens|ENSMUST00000029947|gb|AF024620	Gabrr1	-3.832
A_51_P359262	ref|NM_025468|ens|ENSMUST00000125552|ens|ENSMUST00000025394|gb|AK007641	Sec11c	-3.832
A_66_P120414	ref|NM_001012765|gb|AK160942|riken|4021403P06|nap|NAP002186-001	Adcy5	-3.832
A_51_P503883	ref|NM_001081333|ens|ENSMUST00000161672|ens|ENSMUST00000159286|ens|ENSMUST00000162381	Plekhg4	-3.829
A_30_P01021433	Unknown	chrX:98716130-98716340_R	-3.829
A_51_P194628	ref|NM_173037|ens|ENSMUST00000048359|gb|AK085030|tc|TC1621078	Tmco7	-3.826
A_55_P2143527	ref|NM_177059|gb|BC132353|gb|BC144824|gb|AF374459	Fstl4	-3.826
A_55_P1990538	ref|NM_029561|ref|NM_001190989|ens|ENSMUST00000149781|ens|ENSMUST00000149358	Ndfip2	-3.826
A_30_P01026400	Unknown	chr3:127039311-127201919_R	-3.826
A_55_P2033420	ref|NM_023220|ens|ENSMUST00000028844|gb|AB041547|gb|AK155011	2010106G01Rik	-3.826
A_55_P2046877	ref|NM_008239|ens|ENSMUST00000042118|gb|BC047155|gb|AK147202	Foxq1	-3.824
A_52_P59681	ref|NM_008287|ens|ENSMUST00000125286|ens|ENSMUST00000022946|gb|U50631	Hrsp12	-3.824
A_55_P2079757	ens|ENSMUST00000152491	Gm6489	-3.824
A_52_P496655	ref|NM_026609|ens|ENSMUST00000033910|gb|AK046807|gb|AK153277	Leprotl1	-3.821
A_51_P363914	ref|NM_007636|ens|ENSMUST00000047672|gb|AK075581|gb|AK166891	Cct2	-3.818
A_55_P2095673	gb|BC082611|gb|BC086689	Rgr	-3.818
A_55_P2143885	ref|NM_001081006|ref|NM_001177631|ref|NM_178059|ref|NM_029895	Etl4	-3.818
A_55_P2054663	ref|NM_053091|ens|ENSMUST00000109821|ens|ENSMUST00000010020|gb|AF271382	Cox4i2	-3.818
A_52_P186937	ref|NM_020557|ens|ENSMUST00000020969|gb|AK153469|gb|AK004595	Cmpk2	-3.816
A_55_P2046499	ref|NM_134228|ens|ENSMUST00000055847|gb|AF394955|gb|BC148761	Vmn1r70	-3.816
A_51_P290904	ens|ENSMUST00000106955|gb|AK040404|tc|TC1611340|riken|A430091O22	Raver2	-3.816
A_51_P290207	ref|NM_153526|ens|ENSMUST00000059155|gb|AK135941|gb|AK135989	Insig1	-3.813
A_52_P354298	ref|NM_007459|ens|ENSMUST00000003038|gb|AK152463|gb|AK010721	Ap2a2	-3.813
A_51_P366227	ref|NM_177359|gb|AK083640|gb|AK031686|tc|TC1581547	Zfp799	-3.813
A_55_P2218483	gb|AK043413|tc|TC1625045|riken|A730093L10	A730093L10Rik	-3.813
A_51_P451346	ref|NM_011803|ens|ENSMUST00000000080|gb|AK147904|gb|AK146615	Klf6	-3.813
A_51_P431554	ref|NM_027107|gb|BC027639|gb|AK146257|gb|AK009156	2310004N24Rik	-3.813
A_52_P544043	ref|NM_001163144|ref|NM_001190483|ens|ENSMUST00000050715|ens|ENSMUST00000025618	Pcsk5	-3.811
A_51_P486068	ref|NM_177475|ens|ENSMUST00000061617|gb|AK031331|gb|AK049339	Zfp280b	-3.811
A_51_P196895	ref|NM_028018|ens|ENSMUST00000168394|ens|ENSMUST00000034164|gb|AK050468	2400003C14Rik	-3.811
A_55_P2112797	Unknown	A_55_P2112797	-3.811
A_30_P01028076	Unknown	chr16:30170306-30223193_R	-3.808
A_55_P1975322	nap|NAP111845-1	NAP111845-1	-3.808
A_55_P1971815	ref|NM_009900|ens|ENSMUST00000153075|ens|ENSMUST00000148131|ens|ENSMUST00000007207	Clcn2	-3.808
A_55_P2009640	ref|NR_033553|ens|ENSMUST00000063103|gb|BC048726|tc|TC1602657	1700048O20Rik	-3.808
A_55_P2181222	ref|NM_001162938|ens|ENSMUST00000085876|gb|AK036671|tc|TC1654758	Pydc3	-3.805
A_30_P01030206	Unknown	chr1:195327945-195336595_R	-3.805
A_55_P2136174	ens|ENSMUST00000026094|gb|AK051401|tc|TC1595651|riken|D130046F04	Hdgfrp3	-3.805
A_52_P651948	ref|NM_183254|ens|ENSMUST00000135785|ens|ENSMUST00000124941|ens|ENSMUST00000149949	1700025K23Rik	-3.803
A_30_P01032590	Unknown	chr16:64758224-64765674_R	-3.803
A_51_P192162	ref|NM_172493|gb|BC022654|gb|AK052872|ens|ENSMUST00000113320	Diap2	-3.803
A_52_P440709	ref|NM_023868|ens|ENSMUST00000021750|gb|D38217|gb|X83933	Ryr2	-3.8
A_55_P2024600	ref|NM_001008549|ens|ENSMUST00000107972|ref|XM_003086596|gb|AK155078	Zfp658	-3.8
A_52_P403527	nap|NAP061634-1|nap|NAP026825-1	NAP061634-1	-3.797
A_55_P2091055	Unknown	A_55_P2091055	-3.797
A_52_P97670	ref|NM_001099628|ens|ENSMUST00000045664|gb|AK080580|gb|AK085232	Atad2b	-3.797
A_51_P151902	ref|NM_145584|ens|ENSMUST00000046687|gb|AK146506|gb|BC020531	Spon1	-3.797
A_30_P01021470	Unknown	chr2:35829956-35830757_R	-3.795
A_55_P2072940	ens|ENSMUST00000145052|gb|AK138152|tc|TC1587995|riken|A230016A13	Vsig10	-3.795
A_52_P537566	ref|NM_177150|ens|ENSMUST00000040776|gb|BC121824|gb|AK089172	Cenpt	-3.795
A_30_P01020001	Unknown	chr12:53669892-53710742_F	-3.792
A_52_P494126	ref|NM_177561|gb|BC039916|gb|BC030888|gb|AK039074	Usp46	-3.792
A_30_P01023182	Unknown	chr19:46413742-46418617_F	-3.789
A_55_P1978905	ens|ENSMUST00000085379|nap|NAP019752-001	ENSMUST00000085379	-3.789
A_55_P2099760	nap|NAP094807-001	NAP094807-001	-3.789
A_30_P01030455	Unknown	chr4:155602145-155602619_R	-3.787
A_51_P171288	ref|NM_008130|ens|ENSMUST00000110510|gb|AK048009|gb|AK037232	Gli3	-3.787
A_55_P2099269	ref|NM_026641|ens|ENSMUST00000169064|ens|ENSMUST00000029347|ens|ENSMUST00000136448	Ift80	-3.787
A_51_P209527	ref|NM_009740|ens|ENSMUST00000170398|ens|ENSMUST00000029842|gb|AK076082	Bcl10	-3.787
A_55_P2046198	ref|NM_146118|ref|NM_001164357|ref|NM_001164358|ens|ENSMUST00000113310	Slc25a25	-3.787
A_51_P470715	ref|NM_009895|ens|ENSMUST00000165664|ens|ENSMUST00000085102|ens|ENSMUST00000163673	Cish	-3.787
A_30_P01031824	Unknown	chr3:19211659-19213735_F	-3.787
A_51_P108266	ref|NM_033268|ens|ENSMUST00000168193|ens|ENSMUST00000064204|gb|AF248643	Actn2	-3.784
A_52_P95740	ref|NM_001012667|ref|NM_001146117|ens|ENSMUST00000163774|ens|ENSMUST00000033935	AI316807	-3.784
A_51_P366770	ref|NM_001012625|ref|NM_001012624|ref|NM_001012623|ref|NM_183018	Rims1	-3.784
A_52_P231232	ref|NM_178421|ens|ENSMUST00000088237|gb|AK042989|gb|BC056473	Nanos1	-3.784
A_55_P2054942	ref|NM_001205173|ref|NM_183148|ens|ENSMUST00000040023|ens|ENSMUST00000123827	Iffo2	-3.782
A_30_P01020542	Unknown	chr5:26333765-26338143_F	-3.782
A_30_P01029647	Unknown	chr11:79529699-79530564_F	-3.782
A_30_P01021203	Unknown	chr2:157361470-157379813_F	-3.779
A_55_P2101739	Unknown	A_55_P2101739	-3.779
A_51_P196444	ref|NM_013519|ens|ENSMUST00000054691|gb|AK076319|gb|AK146887	Foxc2	-3.776
A_51_P407774	ref|NM_019723|ens|ENSMUST00000129301|ens|ENSMUST00000076493|gb|BC132147	Slc22a21	-3.774
A_51_P181002	ref|NM_024260|ref|NM_001167750|ens|ENSMUST00000171375|ens|ENSMUST00000165823	Ccdc132	-3.771
A_55_P2154416	ref|NM_030558|ens|ENSMUST00000118960|ens|ENSMUST00000150068|ens|ENSMUST00000090144	Car15	-3.771
A_55_P2074796	ref|NM_007671|ens|ENSMUST00000063531|ens|ENSMUST00000097921|gb|AK157209	Cdkn2c	-3.771
A_55_P2021854	gb|AK011488|ens|ENSMUST00000121246|gb|CB844785|tc|TC1587981	AK011488	-3.771
A_30_P01031014	Unknown	chrX:47893703-47996700_R	-3.771
A_51_P284946	ref|NM_028810|ens|ENSMUST00000017288|gb|AK011442|tc|TC1575622	Rnd3	-3.769
A_51_P471520	ref|NM_021537|ens|ENSMUST00000027498|ens|ENSMUST00000151068|gb|AK152917	Stk25	-3.769
A_55_P2020090	ref|NM_001164630|ref|NM_175541|ref|NM_001164632|ref|NM_001164633	Mum1l1	-3.766
A_55_P1974780	Unknown	A_55_P1974780	-3.766
A_55_P1968916	gb|BC051956|tc|TC1623561	Cbln1	-3.766
A_30_P01032330	Unknown	chr10:60473030-60535340_F	-3.763
A_52_P49321	ref|NM_175314|ens|ENSMUST00000167391|ens|ENSMUST00000113438|gb|AK078802	Adamts9	-3.763
A_52_P582261	ref|NM_175115|ens|ENSMUST00000046306|gb|AK153883|gb|AK009564	Ikzf5	-3.763
A_52_P403246	ref|NM_001080935|ens|ENSMUST00000054783|ens|ENSMUST00000170806|ens|ENSMUST00000164364	B230217C12Rik	-3.761
A_51_P488510	ref|NM_145221|gb|AK173169|gb|AK037695|ens|ENSMUST00000036570	Appl1	-3.761
A_55_P2145257	nap|NAP102544-1|nap|NAP114243-1	NAP102544-1	-3.761
A_55_P2172500	ref|NM_144934|ens|ENSMUST00000051008|gb|BC064744|tc|TC1583491	Mbd3l2	-3.761
A_52_P33382	ref|XM_356935|ref|XM_914955|nap|NAP026524-1	Gm5226	-3.761
A_51_P353856	ref|NM_026861|ens|ENSMUST00000039803|gb|AK049109|gb|AK035384	Ubac2	-3.761
A_52_P540219	ref|NM_011594|ens|ENSMUST00000017610|gb|AK178979|gb|AK081522	Timp2	-3.761
A_52_P565940	ref|NM_008739|ens|ENSMUST00000084206|ens|ENSMUST00000099490|gb|AF419220	Nsd1	-3.761
A_30_P01024887	Unknown	chr18:47329242-47329439_R	-3.758
A_55_P2204491	Unknown	A_55_P2204491	-3.758
A_55_P2413924	gb|AK077526|tc|TC1594121|riken|5730437O09	Gm10404	-3.755
A_52_P478256	ref|NM_178614|ens|ENSMUST00000023071|gb|AK161378|gb|AK159740	Samm50	-3.755
A_51_P125446	ref|NM_026963|ens|ENSMUST00000030842|gb|AK007657|gb|AK146824	Lzic	-3.753
A_51_P509098	ref|NM_019734|ens|ENSMUST00000131796|ens|ENSMUST00000126561|ens|ENSMUST00000034000	Asah1	-3.753
A_30_P01028277	Unknown	chr14:115423660-115463160_F	-3.753
A_30_P01019757	Unknown	chr7:26227170-26234328_R	-3.75
A_55_P2064906	Unknown	A_55_P2064906	-3.75
A_55_P1999202	ref|NM_134239|ens|ENSMUST00000091721|tc|NP496233|nap|NAP057759-1	Vmn1r217	-3.75
A_55_P2100550	ref|NM_133767|ens|ENSMUST00000093239|ens|ENSMUST00000101423|ens|ENSMUST00000020749	Mtif2	-3.75
A_51_P322285	ref|NM_001081057|ens|ENSMUST00000165978|ens|ENSMUST00000021703|ens|ENSMUST00000169597	Tecpr2	-3.75
A_51_P419571	ref|NM_027101|ref|NM_027002|ens|ENSMUST00000025106|gb|AK009093	Polr2d	-3.75
A_55_P2048498	ens|ENSMUST00000073111|ens|ENSMUST00000089101|ref|XM_001474426|ref|XM_003086008	ENSMUST00000073111	-3.75
A_51_P499776	ref|NM_026603|ens|ENSMUST00000023869|gb|AK135127|gb|AK018762	Denr	-3.748
A_55_P1993698	ref|NM_001244891|ref|NM_001244903|ref|NM_017368|ref|NM_198683	Celf1	-3.748
A_52_P462472	ref|NM_001077354|ens|ENSMUST00000056502|ens|ENSMUST00000087879|ens|ENSMUST00000118314	C77370	-3.748
A_55_P1994290	gb|AK082307|gb|XM_003085113|tc|TC1622857|riken|C230036B22	AK082307	-3.745
A_66_P115406	ref|NM_008774|ens|ENSMUST00000146577|ens|ENSMUST00000142357|ens|ENSMUST00000155116	Pabpc1	-3.745
A_55_P2058957	ref|NM_001252341|ref|NM_009306|ref|NM_001252342|ens|ENSMUST00000064054	Syt1	-3.745
A_51_P113773	ref|NM_029420|ref|NR_033446|ens|ENSMUST00000155012|ens|ENSMUST00000142337	Slx1b	-3.745
A_52_P20357	ref|NM_009702|ens|ENSMUST00000043160|gb|AK122310|gb|AK145547	Aqr	-3.742
A_55_P2022870	gb|AK163669|riken|B830047I20	AK163669	-3.742
A_52_P256279	ref|NM_173026|ens|ENSMUST00000050248|gb|BC055403|tc|TC1652115	Zbtb11	-3.742
A_55_P2023441	ref|NM_023876|ens|ENSMUST00000122965|gb|AK034529|gb|EF410087	Elp4	-3.742
A_30_P01025476	Unknown	chr2:25182970-25188091_R	-3.74
A_52_P494982	ref|NM_026191|ens|ENSMUST00000081401|ens|ENSMUST00000018569|tc|TC1637879	Dhx40	-3.74
A_55_P2166128	tc|TC1731267	TC1731267	-3.74
A_55_P1978608	nap|NAP111713-1	NAP111713-1	-3.74
A_52_P645159	ref|NM_001013391|ens|ENSMUST00000069168|gb|AK086159|gb|AK168764	Cpsf6	-3.74
A_30_P01031981	Unknown	chr9:78372153-78372834_F	-3.737
A_30_P01031052	Unknown	chr19:16059564-16085402_F	-3.737
A_55_P2269894	gb|AK133925|gb|AV305480|riken|5730529D01	4833417C18Rik	-3.737
A_55_P2044587	ref|NM_001252501|ens|ENSMUST00000076049|ens|ENSMUST00000111756|ens|ENSMUST00000072685	Sorcs1	-3.737
A_30_P01031181	Unknown	chr19:60261340-60273465_F	-3.737
A_55_P2128511	ref|NM_026950|ens|ENSMUST00000087195|tc|TC1670886	Ociad2	-3.735
A_51_P159503	ens|ENSMUST00000093902|ens|ENSMUST00000169768|ens|ENSMUST00000172235|ens|ENSMUST00000131035	Rnf213	-3.735
A_55_P2337213	ref|NM_145511|ens|ENSMUST00000148389|ens|ENSMUST00000132809|ens|ENSMUST00000094477	BC003331	-3.735
A_30_P01020212	Unknown	chr17:15357376-15385701_R	-3.735
A_30_P01029909	Unknown	chr1:141070245-141076841_F	-3.735
A_55_P2072164	ens|ENSMUST00000100000|ref|XR_104751|ref|XR_107433|gb|AK032721	ENSMUST00000100000	-3.732
A_55_P2117710	ref|NR_002896|gb|AK043166|tc|TC1633359|tc|TC1695772	Snhg1	-3.732
A_55_P1993517	ref|NM_001113362|ref|NM_133910|ref|NM_001113364|ens|ENSMUST00000087550	Tbc1d14	-3.732
A_55_P2031966	ref|NM_001099688|ens|ENSMUST00000108504|tc|TC1726658|riken|1700010H23	Fbxo39	-3.73
A_51_P302651	ref|NM_176979|ens|ENSMUST00000035164|gb|BC007170|gb|BC006707	Topbp1	-3.73
A_55_P2145481	ref|NM_146946|ens|ENSMUST00000112948|ens|ENSMUST00000072114|gb|BC127978	Olfr50	-3.73
A_30_P01018886	Unknown	chr7:134779841-134840591_F	-3.727
A_55_P2119552	ref|NR_033123|ens|ENSMUST00000155944|ens|ENSMUST00000084673|ens|ENSMUST00000098117	4933409K07Rik	-3.724
A_52_P392674	ref|NM_019736|ens|ENSMUST00000126200|ens|ENSMUST00000131332|ens|ENSMUST00000026324	Acot9	-3.724
A_51_P483922	ref|NM_133847|ens|ENSMUST00000089027|ens|ENSMUST00000152807|ens|ENSMUST00000149390	Tm9sf4	-3.724
A_55_P2074371	ref|NM_145833|ens|ENSMUST00000051674|gb|AF521097|nap|NAP098592-001	Lin28a	-3.722
A_51_P499854	ref|NM_010284|ens|ENSMUST00000069451|gb|AK143925|gb|BC075720	Ghr	-3.719
A_55_P2135027	Unknown	A_55_P2135027	-3.719
A_52_P123864	ref|NM_024454|ens|ENSMUST00000020343|ens|ENSMUST00000163154|gb|BC055042	Rab21	-3.719
A_51_P140347	ref|NM_172830|ens|ENSMUST00000115694|ens|ENSMUST00000115693|ens|ENSMUST00000074298	Slc4a9	-3.719
A_52_P598835	ref|NM_001162903|gb|AK038660|gb|BC061478|ens|ENSMUST00000172332	2010109K11Rik	-3.719
A_65_P11306	ref|NM_001205095|ref|XR_033816|ref|XR_107970|gb|AK136656	Gm4944	-3.717
A_55_P2115119	ref|NM_027187|ens|ENSMUST00000122931|ens|ENSMUST00000147812|ens|ENSMUST00000109736	Rnaseh2a	-3.717
A_55_P2031045	ref|NM_011489|ref|NM_001113563|ens|ENSMUST00000107358|ens|ENSMUST00000004143	Stat5b	-3.717
A_30_P01028236	Unknown	chr9:20313342-20323517_R	-3.714
A_55_P1960167	ref|NM_001243052|ref|NM_009737|ref|NM_001243053|ens|ENSMUST00000167710	Bcat2	-3.714
A_51_P403413	ref|NM_053131|ens|ENSMUST00000061717|ens|ENSMUST00000170333|gb|AY013788	Pcdhb6	-3.714
A_55_P2034928	ref|NM_001037925|ens|ENSMUST00000081558|gb|AK132621|tc|TC1586165	BC147527	-3.711
A_51_P201971	ref|NM_030241|ens|ENSMUST00000111458|ens|ENSMUST00000059580|gb|BC085306	Setd8	-3.711
A_51_P275101	ref|NM_021439|ens|ENSMUST00000040110|gb|AK003880|tc|TC1584550	Chst11	-3.711
A_65_P11632	ref|NM_021522|ref|NM_001038589|gb|AK172477|gb|AK161208	Usp14	-3.711
A_55_P1989568	ref|NM_175225|ref|NM_001159640|ref|NM_001159641|ens|ENSMUST00000046656	Tasp1	-3.709
A_30_P01033549	Unknown	chr14:56348028-56348470_R	-3.706
A_55_P2025911	ref|NM_009214|ens|ENSMUST00000145477|ens|ENSMUST00000112529|ref|XM_001473434	Sms	-3.706
A_55_P2084345	gb|AK137674|riken|9930022O17|nap|NAP114945-1	Gm2099	-3.706
A_65_P01643	ref|NM_001081345|ens|ENSMUST00000038366|ens|ENSMUST00000169922|gb|BC029703	Chd2	-3.706
A_55_P2107203	ref|NM_031999|ref|NR_003568|ens|ENSMUST00000021738|ens|ENSMUST00000050549	Gpr137b	-3.706
A_55_P2142156	ref|XM_001474528|nap|NAP102338-1|nap|NAP113010-1|nap|NAP115288-1	Gm16441	-3.704
A_55_P2025660	ref|NM_019930|ens|ENSMUST00000045043|ens|ENSMUST00000144326|ens|ENSMUST00000171056	Ranbp9	-3.704
A_52_P144818	ref|NM_021391|ens|ENSMUST00000023133|gb|AK002813|gb|BC025123	Ppp1r1a	-3.701
A_30_P01019007	Unknown	chr17:3004525-3086000_R	-3.701
A_55_P2104587	Unknown	A_55_P2104587	-3.701
A_55_P2093649	nap|NAP114342-1|nap|NAP092644-001	NAP114342-1	-3.701
A_51_P314153	ref|NM_001025586|ref|NM_001025587|ens|ENSMUST00000095273|gb|AK160346	Nr2c2ap	-3.701
A_55_P2044468	ref|NM_001081154|ens|ENSMUST00000078747|ens|ENSMUST00000090300|gb|AK053159	4921513D23Rik	-3.699
A_55_P2012689	ref|NM_011494|ens|ENSMUST00000131738|ens|ENSMUST00000135484|ens|ENSMUST00000156012	Stk16	-3.699
A_51_P251587	ref|NM_026000|ens|ENSMUST00000100729|gb|AK011984|gb|AK168339	Psmd9	-3.699
A_52_P202029	ref|NM_172406|ens|ENSMUST00000027186|gb|AK122305|gb|AK053848	Trak2	-3.699
A_51_P249793	ref|NM_175118|ens|ENSMUST00000060913|gb|AK002934|gb|AK088940	Dusp28	-3.696
A_55_P2037777	gb|BC040756|gb|BB743404|tc|TC1654835	BC040756	-3.696
A_52_P200925	nap|NAP061138-1|nap|NAP111052-1	NAP061138-1	-3.696
A_51_P493213	ref|NM_177469|ens|ENSMUST00000164049|gb|BC056493|gb|AB096262	Gpr123	-3.696
A_55_P2187034	Unknown	A_55_P2187034	-3.696
A_55_P2133315	ref|NM_001103157|ref|NM_028734|ref|NM_001103156|ens|ENSMUST00000115425	Steap2	-3.696
A_55_P1976958	Unknown	A_55_P1976958	-3.696
A_65_P11539	ref|NM_184088|ens|ENSMUST00000172219|ens|ENSMUST00000167614|ens|ENSMUST00000082026	Dennd4c	-3.696
A_30_P01018528	Unknown	chr17:88225376-88238756_R	-3.694
A_55_P1973451	ref|NM_001162476|ref|NM_009291|ref|NM_001162479|ref|NM_001162475	Stra6	-3.694
A_51_P160907	ref|NM_001045529|ens|ENSMUST00000044068|gb|AK172896|gb|AK168211	Morc3	-3.694
A_55_P2060253	ref|NM_001081019	Gm12657	-3.694
A_52_P670874	ref|NM_019480|ens|ENSMUST00000022964|gb|AY009091|gb|AK004366	Ebag9	-3.694
A_51_P217430	ref|NM_023633|ens|ENSMUST00000053744|gb|BC138094|gb|AK080870	2410016O06Rik	-3.691
A_51_P376238	ref|NM_009776|ens|ENSMUST00000023994|gb|AF010254|gb|AK165744	Serping1	-3.691
A_55_P2006906	ref|NM_027870|ens|ENSMUST00000086884|ens|ENSMUST00000081834|gb|AK030729	Armcx3	-3.688
A_51_P291682	ref|NM_134020|ens|ENSMUST00000004508|gb|AK158876|gb|AK078425	Tmed4	-3.688
A_30_P01025981	Unknown	chr4:45079022-45096897_R	-3.688
A_51_P436483	ref|NM_025280|ens|ENSMUST00000042512|gb|AK132548|gb|BC058169	Kin	-3.688
A_51_P237668	ref|NM_009749|ens|ENSMUST00000049130|gb|AK132005|gb|AF097439	Bex2	-3.688
A_51_P174854	ref|NM_019791|ens|ENSMUST00000163883|ens|ENSMUST00000153386|ens|ENSMUST00000139375	Maged1	-3.688
A_52_P152219	ref|NM_173431|ens|ENSMUST00000047783|gb|AJ344253|tc|TC1779721	Rpgrip1l	-3.688
A_55_P2255399	gb|AK170335|tc|TC1597557|riken|F630048H11|nap|NAP056642-1	F630048H11Rik	-3.686
A_52_P160518	ref|NM_019460|ref|NM_001166532|ref|NM_001166531|ens|ENSMUST00000131706	Sfmbt1	-3.686
A_30_P01018357	Unknown	chr15:63902437-63908787_F	-3.686
A_55_P1975640	ref|NM_001033299|ref|NM_001159683|ens|ENSMUST00000109155|ens|ENSMUST00000063710	Zfp217	-3.686
A_51_P439857	ref|NM_030046|ens|ENSMUST00000150878|ens|ENSMUST00000146323|ens|ENSMUST00000136591	Dnajc21	-3.686
A_51_P341664	ref|NM_133228|ens|ENSMUST00000004225|gb|AF242377|gb|AK030724	Zfp87	-3.686
A_52_P211197	ref|NM_026629|ens|ENSMUST00000046276|gb|AK043452|tc|TC1581086	2410066E13Rik	-3.681
A_55_P2115257	ref|NM_001037997|ref|NM_008000|ens|ENSMUST00000000129|ens|ENSMUST00000112833	Fert2	-3.681
A_55_P2013203	ref|NM_001081147|ens|ENSMUST00000053306|gb|AK143340|gb|AK143287	Oxtr	-3.681
A_30_P01025266	Unknown	chr6:31267612-31293337_R	-3.678
A_52_P197627	ref|NM_009471|ens|ENSMUST00000131990|ens|ENSMUST00000023510|gb|AK035821	Umps	-3.678
A_55_P2422243	gb|AK013766|riken|2900072G11	2900072G11Rik	-3.678
A_52_P482925	ref|NM_025814|ref|NM_001113564|ref|NM_001113565|ref|NM_001113566	Serbp1	-3.676
A_51_P483373	ref|NM_145367|ens|ENSMUST00000160046|ens|ENSMUST00000035988|ens|ENSMUST00000168624	Txndc5	-3.676
A_55_P2124676	ref|NM_175266|ens|ENSMUST00000060711|gb|AK043518|gb|AK033908	Epm2aip1	-3.673
A_55_P2052470	ref|NM_025641|tc|TC1632169	Uqcrh	-3.673
A_51_P509808	ref|NM_018828|ens|ENSMUST00000013759|gb|U40750|gb|AK084018	Fnbp4	-3.673
A_52_P432245	ref|NM_175631|ens|ENSMUST00000087950|gb|BC132027|gb|BC132025	Cbln4	-3.673
A_55_P2013760	ref|NM_001135151|ref|NM_144808|ref|NM_001135152|ens|ENSMUST00000082144	Slc39a14	-3.673
A_51_P302566	ref|NM_172778|ens|ENSMUST00000040820|gb|AK054050|gb|AK031833	Maob	-3.673
A_66_P125862	ref|NR_015487|ref|NR_027895|gb|AK020812|gb|AK081943	A930005H10Rik	-3.673
A_55_P2184177	ref|XM_003084696|gb|AK158955|riken|K530019B05|nap|NAP036192-1	Gm19671	-3.673
A_55_P2248320	gb|AK049485|riken|C430016H01	C430003N24Rik	-3.671
A_66_P126159	ref|NM_001080971|gb|BC147687|gb|BC147698|gb|BC147322	Tubb1	-3.671
A_52_P444785	ens|ENSMUST00000144378|gb|BC037393|gb|BI441540|tc|TC1585455	N4bp2l2	-3.671
A_30_P01029167	Unknown	chr13:76326228-76332632_F	-3.671
A_55_P2032849	Unknown	A_55_P2032849	-3.671
A_51_P308814	ref|NM_026654|ens|ENSMUST00000030451|gb|AK046576|gb|AK148609	Toe1	-3.668
A_55_P2227335	ref|NM_011212|ens|ENSMUST00000073961|ens|ENSMUST00000054880|gb|U36758	Ptpre	-3.665
A_55_P2062836	ref|NM_001013026|ens|ENSMUST00000076941|gb|AK087352|gb|AK014607	Ttf2	-3.665
A_55_P2087872	Unknown	A_55_P2087872	-3.665
[truncated: 2,763 more rows]

## Sheet: Table S4
Table S4. Genes up-regulated ≥2.5 fold in the cerebellum of female pups from mothers having FA supplementation during gestation at 20 mg/kg in comparison to mothers at 2 mg/kg diet.
UniqueID	Accession	Symbol	Fold Change
A_30_P01028725	Unknown	chr14:25924039-25924372_F	166.667
A_65_P19832	ref|NM_013697|ens|ENSMUST00000075312|gb|AK050155|gb|AK018701	Ttr	31.25
A_55_P1978636	ens|ENSMUST00000099035|tc|TC1642683	ENSMUST00000099035	25.641
A_51_P234714	ref|NM_025957|ens|ENSMUST00000023953|gb|AK005482|gb|AK005533	Ceacam14	23.2558
A_55_P2165554	ens|ENSMUST00000099046|ens|ENSMUST00000099051|ens|ENSMUST00000099047|ens|ENSMUST00000151376	ENSMUST00000099046	23.2558
A_30_P01031586	Unknown	chr5:110502650-110522475_F	22.7273
A_66_P124164	ens|ENSMUST00000099683|ens|ENSMUST00000099684|ens|ENSMUST00000170073|ens|ENSMUST00000099046	ENSMUST00000099683	22.2222
A_55_P2240919	ens|ENSMUST00000135739|gb|AK029486|tc|TC1626483|riken|4833447H21	ENSMUST00000135739	21.7391
A_55_P2138100	ens|ENSMUST00000099050|ens|ENSMUST00000099049|ens|ENSMUST00000099051|ens|ENSMUST00000099047	ENSMUST00000099050	20.8333
A_55_P2093862	ens|ENSMUST00000099042|ens|ENSMUST00000099056|ens|ENSMUST00000075573|ens|ENSMUST00000099047	ENSMUST00000099042	19.6078
A_30_P01027027	Unknown	chr2:77146893-77155643_F	19.2308
A_55_P2127015	ref|NM_146392|ens|ENSMUST00000035250|gb|BC120861|gb|BC132043	Olfr720	17.5439
A_55_P1985815	ens|ENSMUST00000103673|tc|NP396944|nap|NAP019755-001	ENSMUST00000103673	16.129
A_55_P1954970	Unknown	A_55_P1954970	15.873
A_55_P2011877	ref|NM_012011|ens|ENSMUST00000091197|ens|ENSMUST00000148961|gb|AK009448	Eif2s3y	15.625
A_30_P01027196	Unknown	chr1:173353316-173367449_F	14.9254
A_55_P1952854	tc|TC1619184	TC1619184	14.7059
A_55_P1971120	ref|NM_001168590|ref|NM_026333|ens|ENSMUST00000026602|gb|AK008319	2010106E10Rik	14.4928
A_55_P2118856	ens|ENSMUST00000072455|gb|AK015192|tc|TC1733120|riken|4930423O20	ENSMUST00000072455	14.0845
A_30_P01027483	Unknown	chr17:87674225-87682154_F	13.3333
A_30_P01026933	Unknown	chr10:8662761-8665101_R	13.3333
A_30_P01030200	Unknown	chr8:124355710-124401160_F	13.3333
A_55_P2147636	gb|CJ100031|tc|TC1664483	CJ100031	12.987
A_30_P01028227	Unknown	chr18:35967933-35986564_R	12.987
A_30_P01026767	Unknown	chr1:71718767-71719614_F	12.5
A_55_P1969792	gb|BX514557|tc|TC1676442	BX514557	12.1951
A_55_P2001486	Unknown	A_55_P2001486	12.1951
A_55_P2190217	gb|AK018600|tc|TC1600636|riken|9130007G19|nap|NAP024819-001	9130007G19Rik	12.0482
A_55_P2050169	ref|NM_134244|ens|ENSMUST00000091734|tc|NP1398887|nap|NAP029150-1	Vmn1r197	11.7647
A_55_P1953169	ref|NM_011315|ens|ENSMUST00000006956|gb|BC055885|tc|TC1579237	Saa3	11.7647
A_55_P2074437	Unknown	A_55_P2074437	11.4943
A_51_P321930	ref|NR_037995|ens|ENSMUST00000153297|gb|AK002366|tc|TC1590281	0610009B14Rik	11.4943
A_30_P01028536	Unknown	chr8:110197171-110206546_F	11.236
A_30_P01031427	Unknown	chr1:167219841-167220505_F	10.8696
A_55_P2127809	ref|NM_146570|ens|ENSMUST00000099919|ens|ENSMUST00000099917|tc|TC1599950	Olfr1006	10.7527
A_30_P01030043	Unknown	chr9:65647428-65677009_F	10.5263
A_55_P1970494	Unknown	A_55_P1970494	10.3093
A_55_P2163605	gb|DV654517	DV654517	10.3093
A_55_P1974377	ref|NM_001039120|ens|ENSMUST00000099205|gb|DQ012037|gb|BC139131	Defb26	10.2041
A_51_P444822	ref|NM_146360|ens|ENSMUST00000052997|gb|BC127050|tc|TC1599512	Olfr574	10.101
A_55_P2249379	ref|NR_040337|gb|AK016549|riken|4932434L04|nap|NAP022832-001	Gm16982	10.101
A_55_P2079645	ref|NM_001004159|ens|ENSMUST00000088455|gb|AY365133|gb|AK156711	Clec4b2	10
A_55_P2021355	nap|NAP094492-001	NAP094492-001	9.90099
A_30_P01032919	Unknown	chr5:113594167-113645342_R	9.90099
A_55_P2369534	gb|AK141396|gb|BB416972|riken|C430049E01	C430049E01Rik	9.80392
A_55_P2006812	ref|NM_001113406|ens|ENSMUST00000171542|tc|TC1671591	Krtap11-1	9.80392
A_55_P1955268	ens|ENSMUST00000109160	ENSMUST00000109160	9.80392
A_55_P2178882	ref|XR_105618|ref|XR_106863|gb|AK003851|tc|NP359359	1110020C17Rik	9.70874
A_30_P01031470	Unknown	chr6:31037606-31037912_R	9.61538
A_30_P01031381	Unknown	chr2:153325670-153352170_F	9.34579
A_30_P01025298	Unknown	chr17:33439305-33441112_R	9.34579
A_30_P01018137	Unknown	chr9:65368908-65377592_R	9.34579
A_30_P01027682	Unknown	chr16:21305700-21306107_F	9.34579
A_30_P01026494	Unknown	chr4:88745771-88776323_F	9.25926
A_55_P2098170	ref|NM_146706|ref|NM_146707|ens|ENSMUST00000079827|ens|ENSMUST00000080365	Olfr401	9.17431
A_55_P2058245	gb|AK015118|tc|TC1606036|riken|4930412E21|nap|NAP073941-1	4930412E21Rik	9.17431
A_55_P2112459	ref|NM_029383|ens|ENSMUST00000038693|gb|AK008821|gb|AV360254	Cldn22	9.09091
A_55_P2001336	gb|AK036897|tc|TC1599685|riken|9930022F21|nap|NAP117545-1	Gpr31c	8.92857
A_66_P126915	gb|AK021326|riken|D730003K21|nap|NAP077431-1	D730003K21Rik	8.84956
A_52_P380263	ref|NM_013723|ens|ENSMUST00000026698|gb|AF290209|gb|BC052442	Podxl	8.77193
A_55_P2013406	Unknown	A_55_P2013406	8.77193
A_55_P2168256	gb|AK137725|riken|9930117E08	Gm3881	8.69565
A_55_P2056580	ens|ENSMUST00000161614|ref|XR_105770|ref|XR_107014|gb|AK045496	ENSMUST00000161614	8.62069
A_55_P2033676	ref|NM_009511|ens|ENSMUST00000100988|ens|ENSMUST00000011315|gb|AK142357	Vipr2	8.62069
A_55_P1979242	ref|NM_134110|ens|ENSMUST00000113971|ens|ENSMUST00000047383|gb|AK008619	Kcne2	8.54701
A_55_P2061645	ens|ENSMUST00000082419|gb|AK140300|gb|BC071253|tc|TC1717053	ND6	8.54701
A_30_P01031499	Unknown	chr16:90103524-90104408_R	8.54701
A_30_P01026287	Unknown	chr8:49911596-49912196_R	8.47458
A_30_P01032428	Unknown	chr8:26428975-26490975_R	8.47458
A_30_P01031441	Unknown	chr8:67542714-67561694_F	8.40336
A_55_P2043867	gb|AK039881|riken|A430025B11	AK039881	8.40336
A_51_P364871	ref|NM_146368|ens|ENSMUST00000100145|gb|BC114393|gb|BC114424	Olfr361	8.33333
A_66_P134394	ref|NM_033614|ref|NM_001170959|ens|ENSMUST00000025956|ens|ENSMUST00000112329	Pde6c	8.26446
A_30_P01018389	Unknown	chr3:95460633-95461443_R	8.19672
A_55_P2020726	Unknown	A_55_P2020726	8.19672
A_55_P1998937	ref|NM_177635|gb|AF539596|ens|ENSMUST00000041964|tc|NP659936	H2-M11	8.19672
A_55_P2087008	ens|ENSMUST00000115842|gb|AK029018|tc|TC1595352|riken|4732482D04	Dsg3	8.13008
A_55_P2070451	gb|BU961056	BU961056	8.13008
A_55_P2387515	ref|XR_105147|ref|XR_107933|tc|TC1641323	9130208D14Rik	8.13008
A_30_P01023952	Unknown	chr5:32392912-32395033_F	8.06452
A_51_P349904	ens|ENSMUST00000054653|gb|AK015211|gb|BY714766|tc|TC1619354	ENSMUST00000054653	8.06452
A_30_P01028337	Unknown	chr5:15184252-15184923_F	8.06452
A_51_P368394	ref|NM_019964|ens|ENSMUST00000061866|gb|AB028856|gb|AK006026	Dnajb8	8
A_55_P2002054	ref|NM_177201|ens|ENSMUST00000112666|ens|ENSMUST00000112662|ens|ENSMUST00000046962	Phf8	8
A_51_P403814	ref|NM_001166067|ens|ENSMUST00000039212|gb|AK049248|gb|AK049140	Slc4a5	7.93651
A_55_P2089467	nap|NAP062147-1	NAP062147-1	7.87402
A_55_P2018357	ref|NM_175270|ens|ENSMUST00000061328|gb|AK033641|gb|AK033423	Sowahb	7.87402
A_30_P01018134	Unknown	chr5:33788271-33788845_R	7.8125
A_55_P2105507	Unknown	A_55_P2105507	7.8125
A_55_P2066505	gb|AY500847|gb|X15313|gb|AK220229	Mpo	7.75194
A_30_P01027141	Unknown	chr13:66104025-66114075_R	7.75194
A_55_P1973417	gb|BC048373|gb|BC055446|gb|BC021350|gb|BC080715	BC048373	7.69231
A_30_P01025973	Unknown	chr1:77819988-77820546_F	7.69231
A_52_P534810	ref|NM_001013750|ens|ENSMUST00000059937|gb|BC150996|gb|AK076972	Gm597	7.69231
A_30_P01023531	Unknown	chr8:48476637-48492537_R	7.63359
A_55_P1957792	ref|NM_146597|ens|ENSMUST00000080899|gb|BC120573|tc|TC1683377	Olfr702	7.63359
A_55_P2181464	Unknown	A_55_P2181464	7.63359
A_30_P01018255	Unknown	chr3:106858397-106896812_R	7.57576
A_30_P01023219	Unknown	chr8:15580278-15583962_R	7.57576
A_51_P339293	ref|NM_146610|ens|ENSMUST00000079767|gb|BC140123|gb|BC140163	Olfr972	7.57576
A_55_P2056571	Unknown	A_55_P2056571	7.5188
A_55_P2115906	ref|NM_181680|ref|NM_181682|ens|ENSMUST00000076737|gb|AY314983	Dsg1c	7.5188
A_30_P01028278	Unknown	chr2:75444518-75497268_R	7.5188
A_55_P1996181	ref|NM_001103368|ens|ENSMUST00000165834	Vmn2r80	7.5188
A_52_P853177	ref|NM_011923|ens|ENSMUST00000004208|gb|AK155464|tc|TC1614009	Angptl2	7.5188
A_66_P127563	gb|DQ372760|gb|AB117094|nap|NAP112220-1	DQ372760	7.46269
A_51_P386802	ref|NR_040445|ens|ENSMUST00000035860|gb|AK006064|tc|TC1589204	1700017G19Rik	7.40741
A_55_P2130516	ref|NM_009489|ens|ENSMUST00000094864|ens|ENSMUST00000174433|ens|ENSMUST00000174506	Vmn2r37	7.40741
A_55_P2054703	nap|NAP061306-1|nap|NAP060700-1|nap|NAP062657-1	NAP061306-1	7.40741
A_55_P2303868	gb|AK050516|tc|TC1613479|riken|C820006M04|nap|NAP117042-1	5033421B08Rik	7.40741
A_55_P2149975	ref|NM_009220|ref|NM_001103152|ens|ENSMUST00000164198|ens|ENSMUST00000166553	Ssty1	7.40741
A_55_P2018337	ref|NM_001039201|ref|NM_029826|ens|ENSMUST00000097522|ens|ENSMUST00000026485	Hdhd2	7.35294
A_30_P01024758	Unknown	chr13:41337973-41379821_F	7.35294
A_55_P2363170	gb|BY714637	4930406D18Rik	7.35294
A_30_P01020148	Unknown	chr6:86477309-86537554_F	7.35294
A_55_P2182372	ref|XM_915096|ref|XM_976192	Gm7254	7.29927
A_55_P2328082	ref|NR_040387|gb|AK142074|riken|D230021C23	AI606473	7.29927
A_30_P01020418	Unknown	chr3:3030146-3033623_F	7.24638
A_30_P01032499	Unknown	chr8:85952719-85958369_F	7.24638
A_55_P2421835	gb|AK015812|riken|4930517G19|nap|NAP074454-1	4930517G19Rik	7.24638
A_52_P78931	ref|NM_001167937|ref|NM_001167938|gb|BC157933|gb|AK139701	D6Ertd527e	7.24638
A_30_P01027391	Unknown	chr15:96984422-97000322_F	7.24638
A_51_P415546	ref|NM_054074|ens|ENSMUST00000063112|gb|BC119422|gb|BC141871	Defb6	7.19424
A_55_P2424702	gb|AK017080|gb|AV266161|riken|4933436F18|nap|NAP073581-1	4933436F18Rik	7.19424
A_55_P2030923	ref|NM_001081388|ens|ENSMUST00000031370|ens|ENSMUST00000111346|tc|TC1597580	Rimbp2	7.19424
A_51_P474053	ref|NM_001166206|gb|AK005451|gb|BC099428|ens|ENSMUST00000040941	Erv3	7.19424
A_55_P2136895	ref|NR_036630|ens|ENSMUST00000124276|gb|BC065044|gb|BQ840068	Gm1082	7.14286
A_55_P2004511	ref|NM_001169153|ref|NM_145634|ens|ENSMUST00000106561|ens|ENSMUST00000051264	Cd300lf	7.0922
A_30_P01021479	Unknown	chr7:71220656-71221612_R	7.0922
A_52_P52910	ref|NM_146149|ens|ENSMUST00000047620|gb|AK008396|gb|AK008553	Fam151a	7.0922
A_55_P1987884	ref|NM_178786|ens|ENSMUST00000069769|ens|ENSMUST00000106565|ens|ENSMUST00000106564	Skint4	7.04225
A_55_P2120025	gb|DV058394	Gm7596	7.04225
A_30_P01025695	Unknown	chr4:98943050-98959998_R	6.99301
A_51_P164393	ref|NM_153519|ref|NM_001146002|ens|ENSMUST00000050236|gb|AF196282	Txndc2	6.99301
A_55_P2076692	ref|NM_001177848|ref|NM_001033240|ens|ENSMUST00000099096|ens|ENSMUST00000109342	Wfdc6a	6.94444
A_55_P2014352	Unknown	A_55_P2014352	6.94444
A_55_P1973081	ref|NM_053232|ens|ENSMUST00000168416|gb|BC150722|tc|NP407201	Vmn1r29	6.94444
A_55_P2069781	Unknown	A_55_P2069781	6.89655
A_51_P263993	ref|NM_008280|ens|ENSMUST00000164994|ens|ENSMUST00000034731|gb|AY228765	Lipc	6.89655
A_52_P179785	ref|NM_138952|ens|ENSMUST00000170586|gb|AF461040|gb|AF487539	Ripk2	6.84932
A_55_P1966155	ref|NM_001012725|ens|ENSMUST00000094346|ens|ENSMUST00000163351|gb|BC141216	Wfdc6b	6.84932
A_55_P2099459	gb|AK080112|tc|TC1608500|riken|A530063B08|nap|NAP081371-1	Gm4151	6.84932
A_55_P2012107	ref|NM_009491|ens|ENSMUST00000079163	Vmn2r10	6.80272
A_30_P01033163	Unknown	chr7:71231097-71233680_R	6.80272
A_30_P01025408	Unknown	chr3:145269449-145298239_R	6.80272
A_30_P01019239	Unknown	chrX:135882029-135892277_R	6.80272
A_30_P01033180	Unknown	chr14:79724027-79729152_F	6.80272
A_51_P229002	ref|NM_029777|ref|NM_001122685|ens|ENSMUST00000165975|ens|ENSMUST00000140020	Rhbdd1	6.80272
A_55_P2290218	gb|AI853502	AI853502	6.75676
A_55_P2150328	Unknown	A_55_P2150328	6.75676
A_55_P2099139	ref|XM_984157|ref|XM_983726|ens|ENSMUST00000165136|ens|ENSMUST00000163655	Gm8127	6.75676
A_51_P288295	ens|ENSMUST00000103496|gb|FM179740|gb|AF218639|gb|AF218655	ENSMUST00000103496	6.75676
A_55_P2182056	ref|NM_153102|ens|ENSMUST00000080541|ens|ENSMUST00000107130|ens|ENSMUST00000107129	Zfp352	6.75676
A_55_P2061371	ref|NR_003564|gb|BC099439|ens|ENSMUST00000061938|ens|ENSMUST00000121228	Gm15698	6.75676
A_55_P2153091	Unknown	A_55_P2153091	6.75676
A_55_P2100949	ens|ENSMUST00000060930|ens|ENSMUST00000136004	Ccdc158	6.75676
A_55_P2122884	ref|NM_011195|gb|BC119062|gb|BC120746|gb|U16958	Ptcra	6.75676
A_30_P01022731	Unknown	chr8:60132300-60146830_R	6.71141
A_55_P2022629	ref|NM_181859|gb|AB049996|gb|AB022180|nap|NAP122334-001	Oxct2b	6.71141
A_55_P2362877	gb|AK015549|tc|TC1600092|riken|4930471E19|nap|NAP074237-1	4930471E19Rik	6.71141
A_55_P2116350	Unknown	A_55_P2116350	6.71141
A_30_P01033165	Unknown	chr6:83391748-83398316_F	6.71141
A_55_P2196447	gb|AK020480|gb|C88829|tc|TC1592502|riken|9430069I07	9430069I07Rik	6.71141
A_30_P01021561	Unknown	chr7:134643616-134651441_F	6.71141
A_30_P01028397	Unknown	chr11:95644899-95658549_F	6.71141
A_30_P01024110	Unknown	chr18:47327300-47333819_R	6.71141
A_30_P01021354	Unknown	chr18:5813291-5813708_R	6.71141
A_30_P01019480	Unknown	chr17:74580316-74599991_R	6.66667
A_55_P1966608	ref|XM_003086781|nap|NAP059589-1|nap|NAP113137-1|nap|NAP113250-1	LOC100505009	6.66667
A_30_P01031365	Unknown	chr6:13801450-13853450_F	6.66667
A_66_P114445	Unknown	A_66_P114445	6.66667
A_55_P2277541	gb|AK014916|gb|AV283472|tc|TC1600199|riken|4921518B13	4921518B13Rik	6.62252
A_51_P220150	ref|NM_001039554|ens|ENSMUST00000030840|gb|AK031675|gb|BC023373	Angptl7	6.62252
A_30_P01031120	Unknown	chr13:114111261-114117957_F	6.62252
A_55_P1994462	ref|NM_019404|ens|ENSMUST00000033765|gb|AJ627045|gb|AK052712	Avpr2	6.62252
A_55_P1996434	Unknown	A_55_P1996434	6.57895
A_30_P01021342	Unknown	chr1:64686823-64728598_F	6.57895
A_30_P01022513	Unknown	chr6:28161665-28189840_F	6.53595
A_55_P2014411	ref|NM_001105067|ens|ENSMUST00000169683	Vmn2r35	6.53595
A_55_P2027057	ref|NM_144809|ens|ENSMUST00000166345|ens|ENSMUST00000172335|ens|ENSMUST00000167994	Prdm9	6.49351
A_30_P01017817	Unknown	chr2:84344350-84370075_F	6.49351
A_55_P2247275	gb|AK084148|tc|TC1613969|riken|D230003L03	D330013E07Rik	6.49351
A_55_P2141729	ens|ENSMUST00000113683|gb|AK045231|tc|TC1593835|riken|B130049M08	Snrnp27	6.49351
A_55_P1988571	ens|ENSMUST00000103641|ens|ENSMUST00000103578|ens|ENSMUST00000103609|gb|X63928	ENSMUST00000103641	6.49351
A_55_P2159415	ref|NM_030224|ens|ENSMUST00000018988|gb|BC137682|gb|BC120835	Fndc8	6.49351
A_55_P2221484	ref|NR_045715|ref|NR_045716|gb|AK165234|tc|TC1706431	F420014N23Rik	6.45161
A_55_P2091525	Unknown	A_55_P2091525	6.45161
A_55_P2086323	gb|BC051408	BC051408	6.45161
A_30_P01032400	Unknown	chr11:33414450-33450750_F	6.45161
A_52_P551844	ens|ENSMUST00000108880|gb|AK079810|gb|BC096763|tc|TC1703075	Ccdc69	6.45161
A_30_P01027915	Unknown	chr19:54011403-54018978_F	6.41026
A_30_P01022027	Unknown	chr18:60906766-60920702_F	6.41026
A_30_P01025152	Unknown	chr16:9249688-9275013_R	6.41026
A_55_P2401624	ens|ENSMUST00000168138|ref|XR_104898|ref|XR_107647|gb|AK049864	ENSMUST00000168138	6.41026
A_30_P01022200	Unknown	chr17:29183003-29217681_F	6.41026
A_30_P01023301	Unknown	chr4:146889506-146890173_F	6.36943
A_55_P2148554	ens|ENSMUST00000141133	ENSMUST00000141133	6.36943
A_30_P01027854	Unknown	chr16:38071700-38088275_R	6.36943
A_66_P119550	ens|ENSMUST00000045546|ref|XM_001476076|ref|XM_978766|tc|NP818202	Olfr607	6.28931
A_66_P101819	ref|XR_104759|ref|XR_107435|gb|AK053216|riken|E030042O20	E030042O20Rik	6.28931
A_30_P01028358	Unknown	chr1:188535096-188536977_R	6.28931
A_55_P2162622	ens|ENSMUST00000103685|gb|M23096|gb|M23097|gb|M37284	ENSMUST00000103685	6.28931
A_55_P2047330	ref|NM_001024672|ens|ENSMUST00000075675|gb|AK144032|tc|TC1697842	AB099516	6.28931
A_55_P2285461	Unknown	A_55_P2285461	6.25
A_30_P01021735	Unknown	chr15:73455424-73477275_F	6.25
A_51_P372073	ref|NM_001040692|ref|NM_001168646|ref|NM_001136087|ens|ENSMUST00000022105	Slc6a18	6.21118
A_52_P25026	ref|NM_133203|ens|ENSMUST00000088019|ens|ENSMUST00000122219|ens|ENSMUST00000014687	Klra17	6.21118
A_30_P01031985	Unknown	chr6:89207813-89209131_R	6.17284
A_30_P01023154	Unknown	chr16:50715231-50841124_R	6.17284
A_30_P01031865	Unknown	chr7:49715933-49771497_F	6.17284
A_30_P01019699	Unknown	chr1:23262523-23263246_R	6.17284
A_55_P2151414	ens|ENSMUST00000090235|ens|ENSMUST00000089693|gb|BC171937|gb|AJ011023	Hemt1	6.17284
A_55_P2208373	gb|BY705319	1500002O10Rik	6.17284
A_30_P01024600	Unknown	chr8:126396600-126407275_R	6.17284
A_51_P484054	ref|NM_010172|ens|ENSMUST00000098925|ens|ENSMUST00000033820|gb|AK171362	F7	6.17284
A_52_P221776	ref|NM_010616|ens|ENSMUST00000030042|ens|ENSMUST00000131760|gb|AK018598	Kif12	6.13497
A_55_P2205186	gb|AK017932|gb|AV313996|riken|5830415G21|nap|NAP074848-1	5830415G21Rik	6.13497
A_55_P2123864	ens|ENSMUST00000096285|ens|ENSMUST00000133852|ref|XM_003085301|ref|XM_001481298	ENSMUST00000096285	6.13497
A_30_P01019313	Unknown	chr3:26982754-26983352_R	6.13497
A_55_P2025483	ref|NM_178916|ref|NM_001131068|ref|NM_001131069|ens|ENSMUST00000050997	Rfesd	6.13497
A_51_P376741	ref|NM_177901|ens|ENSMUST00000093342|gb|BC120779|gb|BC117078	4933402J07Rik	6.09756
A_55_P2120566	Unknown	A_55_P2120566	6.09756
A_55_P2026238	Unknown	A_55_P2026238	6.09756
A_55_P1989456	ref|NR_040748|gb|AK029958|tc|TC1624517|riken|4932411C10	Gm6639	6.09756
A_30_P01028589	Unknown	chr7:134835448-134842613_F	6.09756
A_55_P2302413	gb|BC002189|tc|TC1594247	BC002189	6.09756
A_30_P01031873	Unknown	chr4:153321746-153324612_R	6.0241
A_51_P157802	ref|NM_025731|ens|ENSMUST00000025929|gb|AK014971|gb|AK006527	Hrasls5	6.0241
A_55_P2036095	ref|XR_107511|gb|AK141565|tc|TC1662215|tc|TC1688353	Gm3764	6.0241
A_55_P2079812	ref|NM_001011542|ens|ENSMUST00000072368|ens|ENSMUST00000098140|gb|BC148580	Olfr1532-ps1	6.0241
A_30_P01030450	Unknown	chr8:87504644-87513694_F	5.98802
A_55_P2242550	ref|NR_040566|gb|AK016020|gb|AV269324|riken|4930542D17	4930542D17Rik	5.98802
A_55_P1989708	gb|AK032954|tc|TC1609085|riken|6720480N08|nap|NAP075791-1	Gm3052	5.98802
A_55_P2179074	ref|NM_001243760|ref|NM_007575|ref|NM_001243761|ens|ENSMUST00000100187	Ciita	5.95238
A_55_P2039354	Unknown	A_55_P2039354	5.95238
A_30_P01027098	Unknown	chr4:119405156-119461821_F	5.95238
A_55_P2115876	tc|TC1736506|nap|NAP114901-1	TC1736506	5.95238
A_30_P01026660	Unknown	chr2:155289631-155292565_R	5.95238
A_55_P2287760	ref|NR_045447|ens|ENSMUST00000163069|gb|AK002805|riken|0610038L08	0610038L08Rik	5.95238
A_55_P2114188	ref|NR_037975|ens|ENSMUST00000053318|gb|AK052867|riken|D830013H12	Gm5105	5.95238
A_52_P320394	ref|NM_207537|ens|ENSMUST00000094383|gb|BC107192|gb|BC107193	Mrgprb3	5.95238
A_55_P2182389	ref|NM_028047|ens|ENSMUST00000108434|ens|ENSMUST00000146381|ens|ENSMUST00000002280	1500002O20Rik	5.91716
A_55_P2239928	gb|CD766363	1810013D15Rik	5.91716
A_55_P1952196	Unknown	A_55_P1952196	5.91716
A_52_P35072	gb|AK006995|riken|1700084K02|nap|NAP091888-1	1700084K02Rik	5.91716
A_30_P01032452	Unknown	chr13:95613081-95640256_R	5.91716
A_30_P01033062	Unknown	chrX:92119889-92128492_R	5.91716
A_30_P01017518	Unknown	chr10:62812866-62831016_R	5.88235
A_55_P2039180	ref|NM_027996|ref|NM_001252081|ref|NM_001252082|ens|ENSMUST00000022358	2310021P13Rik	5.88235
A_55_P1971867	ref|NM_153143|ens|ENSMUST00000050555|gb|AK161602|gb|AK170258	Kctd11	5.84795
A_30_P01021154	Unknown	chr13:19611679-19620954_F	5.84795
A_30_P01024865	Unknown	chr12:117623500-117643575_F	5.84795
A_55_P2102838	gb|BE853708	BE853708	5.84795
A_55_P2007699	ref|NM_028016|ens|ENSMUST00000112580|ens|ENSMUST00000112581|ens|ENSMUST00000012540	Nanog	5.81395
A_51_P305239	ens|ENSMUST00000038250|ref|XM_003085004|ref|XM_003085901|gb|AK016429	ENSMUST00000038250	5.81395
A_30_P01028171	Unknown	chr5:15033568-15033987_F	5.81395
A_55_P2124070	ref|NM_001162864|ens|ENSMUST00000047034|gb|AK173279|gb|BC059249	Ttbk1	5.81395
A_55_P1984566	nap|NAP115085-1|nap|NAP111523-1	NAP115085-1	5.78035
A_55_P2090289	ref|NM_001166719|ens|ENSMUST00000074381|nap|NAP002164-002	Vmn1r34	5.78035
A_55_P2044957	ref|NM_134176|ens|ENSMUST00000096612|gb|BC132386|gb|BC138489	Vmn1r4	5.74713
A_55_P2156436	nap|NAP062047-1	NAP062047-1	5.74713
A_30_P01022840	Unknown	chr9:113676535-113677163_F	5.74713
A_30_P01026468	Unknown	chr7:69008096-69070309_R	5.74713
A_30_P01028455	Unknown	chr6:82608223-82669023_F	5.71429
A_55_P1968763	ref|NM_199022|ens|ENSMUST00000110480|ens|ENSMUST00000042246|gb|AK148576	Shc4	5.71429
A_30_P01024725	Unknown	chr13:59969950-59989725_F	5.71429
A_55_P2110052	ref|NM_001042542|ref|NM_009651|ens|ENSMUST00000115751|ens|ENSMUST00000115750	Akap4	5.71429
A_55_P2070832	Unknown	A_55_P2070832	5.71429
A_52_P68883	ref|NM_183026|ens|ENSMUST00000052601|gb|BC116198|gb|AJ578468	Defb14	5.71429
A_55_P2120856	ens|ENSMUST00000066461	ENSMUST00000066461	5.71429
A_55_P2052380	ref|NM_194336|ens|ENSMUST00000100961|ens|ENSMUST00000050011|ens|ENSMUST00000100960	Gbp6	5.68182
A_55_P1968325	ref|NM_178630|ens|ENSMUST00000115016|ens|ENSMUST00000115017|gb|AK029793	Agbl3	5.68182
A_30_P01024537	Unknown	chr1:4889810-4890012_R	5.68182
A_55_P2139546	ref|NM_028189|ens|ENSMUST00000034260|tc|TC1583281	B3gnt3	5.68182
A_52_P459564	ref|NM_010575|ens|ENSMUST00000130433|ens|ENSMUST00000131247|ens|ENSMUST00000151625	Itga2b	5.64972
A_55_P2401646	ref|NM_029726|ens|ENSMUST00000075979|ens|ENSMUST00000095762|gb|AF223416	Trdn	5.64972
A_30_P01031564	Unknown	chr10:62262341-62269593_F	5.64972
A_30_P01018536	Unknown	chr11:114686321-114705990_F	5.64972
A_30_P01033152	Unknown	chr2:151773018-151776377_R	5.61798
A_55_P2094945	gb|BG067755|nap|NAP012247-001	BG067755	5.61798
A_55_P2067538	ref|NM_133193|ens|ENSMUST00000095020|gb|BC117797|gb|AF284433	Il1rl2	5.58659
A_55_P2161410	ref|NM_009253|ens|ENSMUST00000168797|gb|BC053337|gb|BC011158	Serpina3m	5.58659
A_55_P2164829	ref|NR_038005|ens|ENSMUST00000059648|gb|AK087762|gb|HM015003	4933413J09Rik	5.58659
A_55_P2047763	ref|NR_040763|gb|AK076865|gb|BB615505|tc|TC1635592	4930519F24Rik	5.58659
A_30_P01024772	Unknown	chr17:15111725-15139800_R	5.58659
A_51_P377228	ens|ENSMUST00000067468|gb|AK044378|tc|TC1590676|riken|A930010C09	ENSMUST00000067468	5.55556
A_55_P2033366	ref|NM_008169|gb|E06820|gb|E06821|gb|D10028	Grin1	5.55556
A_55_P2106778	Unknown	A_55_P2106778	5.55556
A_30_P01017717	Unknown	chr16:64765397-64765884_F	5.55556
A_55_P2139019	ens|ENSMUST00000123698|ens|ENSMUST00000125069|ens|ENSMUST00000163378|ens|ENSMUST00000136547	Hivep3	5.55556
A_55_P2183055	ref|NM_007893|ens|ENSMUST00000056032|gb|X76858|gb|AK144176	E4f1	5.52486
A_51_P324814	ref|NM_010664|ens|ENSMUST00000023803|gb|AK167072|gb|AK167265	Krt18	5.52486
A_55_P2022624	ref|NM_001253877|ref|NM_001253878|ref|NM_001253879|ref|NM_013827	Mtf2	5.52486
A_30_P01031939	Unknown	chr13:53100475-53113850_F	5.52486
A_55_P2401004	gb|AK138270|riken|A230049L08	B230110C06Rik	5.52486
A_30_P01031547	Unknown	chr18:69923410-69965360_R	5.52486
A_30_P01033013	Unknown	chr8:67213300-67271700_F	5.52486
A_55_P2049211	ref|NR_003517|ref|NR_003518|gb|AK144226|gb|AK169597	Pisd-ps1	5.52486
A_55_P2115681	Unknown	A_55_P2115681	5.49451
A_52_P127877	gb|AF510860|nap|NAP114885-1	Flg	5.49451
A_30_P01019630	Unknown	chr1:81657350-81765250_F	5.49451
A_51_P161636	ref|NM_201375|ref|NM_001102409|ref|NM_001102410|ref|NM_001102412	Kng2	5.49451
A_30_P01025915	Unknown	chr2:176908707-176991202_R	5.49451
A_66_P137410	ref|NM_001039231|ens|ENSMUST00000071978|ens|ENSMUST00000089906|gb|AK132470	Zfp951	5.46448
A_55_P2102350	ref|NM_029682|ens|ENSMUST00000119603|ens|ENSMUST00000054956|gb|BC018343	Stambpl1	5.46448
A_55_P2133001	ref|NM_024469|gb|BC051555|gb|BC037742|gb|BC023231	Bhlhe41	5.46448
A_55_P2137291	gb|AK082708|tc|TC1593638|riken|C230092H20|nap|NAP084984-1	Gm16487	5.43478
A_30_P01022359	Unknown	chr3:30099759-30133959_F	5.43478
A_30_P01024318	Unknown	chr2:75444518-75497268_F	5.43478
A_55_P2370250	gb|AK036325|riken|9630056N24	Syn3	5.43478
A_55_P2064976	ref|NR_028384|gb|AK014838|gb|AK015922|gb|BC031206	4930528A17Rik	5.43478
A_55_P2360356	ref|NR_045431|gb|AK016599|tc|NP741622|riken|4933401D09	4933401D09Rik	5.40541
A_66_P113141	gb|AK042438|tc|TC1593591|riken|A630091L03|nap|NAP081983-1	Gm9878	5.40541
A_52_P350344	ref|NM_001037744|ens|ENSMUST00000045976|gb|BC099499|tc|TC1591062	Timm8a2	5.40541
A_55_P1999888	ref|NM_011998|ens|ENSMUST00000109222|gb|AK009113|gb|BC057886	Chst4	5.37634
A_30_P01028216	Unknown	chr4:33375464-33377138_R	5.37634
A_55_P1958260	Unknown	A_55_P1958260	5.37634
A_51_P398118	ref|NM_134218|gb|BC140450|gb|BC146554|ens|ENSMUST00000124841	Vmn1r208	5.37634
A_55_P2370419	gb|BQ550053	AA409749	5.37634
A_55_P2047200	Unknown	A_55_P2047200	5.37634
A_30_P01026961	Unknown	chr12:81217572-81233910_F	5.37634
A_55_P2100290	ref|NM_007416|ens|ENSMUST00000067258|ens|ENSMUST00000124306|ens|ENSMUST00000167574	Adra1b	5.34759
A_52_P430322	ref|XM_003085277|ref|XM_984840|nap|NAP020145-001	Gm17759	5.34759
A_30_P01027513	Unknown	chr3:151746091-151753763_F	5.34759
A_30_P01019182	Unknown	chr1:138473514-138476054_R	5.34759
A_30_P01031761	Unknown	chr7:96640618-96649018_R	5.34759
A_55_P2144160	ref|NM_147047|ens|ENSMUST00000098197|tc|NP646592|nap|NAP021320-001	Olfr618	5.34759
A_55_P2096742	ref|NM_001007472|gb|AJ862873|gb|AJ862874|gb|AJ862875	Noto	5.31915
A_30_P01029701	Unknown	chr17:84895250-84908450_F	5.31915
A_30_P01024092	Unknown	chr2:94082835-94101939_F	5.31915
A_51_P448856	ref|NM_019680|ens|ENSMUST00000033429|ens|ENSMUST00000114958|gb|AF016714	Elf4	5.29101
A_51_P341336	ref|NM_025778|ens|ENSMUST00000163589|ens|ENSMUST00000032321|gb|AK016670	Bcl2l14	5.29101
A_55_P2138921	Unknown	A_55_P2138921	5.29101
A_30_P01030343	Unknown	chr17:8719950-8783850_R	5.26316
A_30_P01028027	Unknown	chr18:38776580-38841080_R	5.26316
A_55_P1985346	ens|ENSMUST00000156409|gb|BG099879	ENSMUST00000156409	5.26316
A_55_P2314316	gb|CA491940	0610008F07Rik	5.26316
A_51_P255257	ref|NM_146723|ens|ENSMUST00000055146|gb|BC107332|gb|BC107333	Olfr513	5.2356
A_30_P01031356	Unknown	chr1:167515313-167516122_F	5.2356
A_66_P107583	ref|NM_194063|ref|NM_001114157|ens|ENSMUST00000081327|ens|ENSMUST00000115203	Rhox3a	5.2356
A_55_P2035852	ens|ENSMUST00000128681|gb|BY706965|tc|TC1672892	ENSMUST00000128681	5.2356
A_52_P416327	ref|NM_178687|ref|NM_001039149|ens|ENSMUST00000037142|gb|AK036455	Cd226	5.20833
A_55_P2118609	ref|NM_011371|ens|ENSMUST00000009732|gb|Y11274|tc|TC1592196	St6galnac1	5.20833
A_30_P01023123	Unknown	chr14:78957377-78962977_F	5.20833
A_55_P1961433	Unknown	A_55_P1961433	5.18135
A_55_P2118153	gb|AK005972|tc|TC1596277|riken|1700014B07|nap|NAP013721-001	1700014B07Rik	5.18135
A_30_P01030656	Unknown	chr1:138570107-138632310_R	5.18135
A_55_P2352652	gb|BG864327	Gm12346	5.18135
A_51_P107959	ens|ENSMUST00000098226|ens|ENSMUST00000131357|ref|XR_033917|ref|XR_034525	ENSMUST00000098226	5.15464
A_55_P2109827	ref|NM_001164071|ref|NM_001164072|ref|NM_011529|ens|ENSMUST00000112501	Tank	5.15464
A_55_P1976042	Unknown	A_55_P1976042	5.15464
A_55_P2212968	ref|NM_001113394|ref|NM_001113393|ref|NM_001113392|ens|ENSMUST00000161559	Cd247	5.15464
A_55_P2136000	gb|AK145256|riken|G930028J06	AK145256	5.12821
A_30_P01025574	Unknown	chr15:79795261-79796945_R	5.12821
A_55_P1978156	gb|AK080246|gb|BB225028|tc|TC1610925|riken|A530089E07	AK080246	5.12821
A_66_P126323	ref|NR_040511|ens|ENSMUST00000114915|ens|ENSMUST00000125091|gb|AK020309	9230102O04Rik	5.12821
A_51_P230552	ref|NM_009053|ens|ENSMUST00000026156|ens|ENSMUST00000123273|gb|U94350	Rfng	5.10204
A_51_P478722	ref|NM_011579|ref|NM_001145164|ens|ENSMUST00000068063|ens|ENSMUST00000046745	Tgtp1	5.10204
A_30_P01025031	Unknown	chr18:5988500-6022000_F	5.10204
A_30_P01021075	Unknown	chr18:75518299-75524782_R	5.07614
A_55_P1975492	ref|NM_001160141|ref|NM_207162|ref|NM_001160137|ref|NM_001160142	LOC100041223	5.07614
A_55_P2143591	Unknown	A_55_P2143591	5.07614
A_52_P628171	ref|NM_001037177|ref|NM_001037178|ens|ENSMUST00000029057|ens|ENSMUST00000109182	Nfatc2	5.05051
A_51_P317254	ref|NM_139221|ens|ENSMUST00000051965|gb|BC099849|gb|AJ437646	Defb11	5.05051
A_52_P199557	ref|NM_028509|ref|NM_001164236|gb|AK076643|gb|AK006598	1700034J05Rik	5.05051
A_30_P01022028	Unknown	chr13:9185198-9185778_F	5.05051
A_30_P01025739	Unknown	chr5:33773842-33942967_F	5.05051
A_55_P2003941	ref|NM_001034868|ens|ENSMUST00000098433|gb|AK148121|riken|G370024M05	Mrgprx2	5.02513
A_55_P2165249	ref|NM_001205343|ref|NM_130887|ens|ENSMUST00000021646|gb|AK053198	Papln	5.02513
A_30_P01025098	Unknown	chr9:96964067-96973567_R	5.02513
A_30_P01023563	Unknown	chr6:30983012-31009987_F	5.02513
A_55_P1974700	ref|NM_028707|ens|ENSMUST00000025205|ens|ENSMUST00000115716|gb|AK018116	Psd2	5
A_30_P01025328	Unknown	chrX:50087925-50101700_R	5
A_51_P222741	ref|NM_010381|gb|AY303781|gb|AY303783|gb|AY303782	H2-Ea-ps	5
A_55_P2150138	ens|ENSMUST00000125987	ENSMUST00000125987	5
A_55_P1954744	nap|NAP023477-001	NAP023477-001	5
A_55_P1970287	ref|NM_001163730|ref|NM_148949|ens|ENSMUST00000076768|ens|ENSMUST00000094413	Gm9125	4.97512
A_30_P01024524	Unknown	chr7:151085617-151100071_F	4.97512
A_55_P2148323	ref|NM_172403|ens|ENSMUST00000093064|ens|ENSMUST00000108819|ens|ENSMUST00000073924	2810021J22Rik	4.9505
A_51_P356842	ref|NM_207230|ens|ENSMUST00000082307|ref|XM_003085375|nap|NAP098943-001	Olfr320	4.9505
A_30_P01029530	Unknown	chr16:90116006-90119297_R	4.92611
A_55_P2089565	ref|NM_181319|ref|NM_145224|ens|ENSMUST00000118986|ens|ENSMUST00000168174	Tbx22	4.92611
A_30_P01025248	Unknown	chr4:3745750-3756200_R	4.92611
A_55_P1997595	ref|NM_028878|ens|ENSMUST00000091501|gb|AK028784|gb|AB096860	Slc6a19	4.92611
A_55_P2020923	ref|NM_001256060|gb|AK139551|riken|B020004C17	B020004C17Rik	4.92611
A_55_P2099742	ref|NM_011888|ens|ENSMUST00000166898|ens|ENSMUST00000115914|ens|ENSMUST00000102957	Ccl19	4.92611
A_55_P1988403	gb|AK136239|riken|7420489F09	Gm8541	4.92611
A_30_P01018073	Unknown	chr3:93152559-93153151_F	4.92611
A_30_P01021318	Unknown	chr4:123155515-123361565_F	4.92611
A_51_P470851	ref|NM_146223|ens|ENSMUST00000045068|gb|AK044211|gb|BC017128	Cplx3	4.92611
A_30_P01027795	Unknown	chr13:83867711-83878140_F	4.92611
A_30_P01018909	Unknown	chr10:98761521-98885681_F	4.92611
A_55_P1953058	ref|NM_001012269|ens|ENSMUST00000089739|tc|TC1643955|nap|NAP059890-1	Olfr1513	4.92611
A_55_P2137045	Unknown	A_55_P2137045	4.90196
A_55_P2302888	gb|BB209673|nap|NAP049488-1	AU042410	4.90196
A_55_P2083949	gb|AK129238|tc|NP859858|tc|TC1688160	Scfd1	4.90196
A_30_P01028498	Unknown	chr2:112014068-112049540_F	4.90196
A_55_P2140478	ens|ENSMUST00000103607|ens|ENSMUST00000103668|gb|AY029362|gb|S80124	ENSMUST00000103607	4.90196
A_55_P2152981	ref|NM_027046|ens|ENSMUST00000062439|gb|AK005741|gb|BC049741	Ccdc54	4.90196
A_55_P2133195	ref|NM_001033767|ens|ENSMUST00000031549|gb|AK149583|tc|TC1587716	Gm4951	4.90196
A_30_P01018363	Unknown	chr12:21381390-21381723_F	4.90196
A_66_P100226	ref|NM_001011852|ens|ENSMUST00000082191|gb|BC150841|tc|TC1599997	Olfr1029	4.87805
A_30_P01026351	Unknown	chr15:83281223-83284791_R	4.87805
A_30_P01025632	Unknown	chr17:6426800-6528950_R	4.87805
A_30_P01022780	Unknown	chr8:126268510-126290810_R	4.87805
A_55_P1984362	ens|ENSMUST00000103264|gb|GU599190|gb|GU599498|gb|GU599764	ENSMUST00000103264	4.87805
A_30_P01018766	Unknown	chr2:83517176-83519228_R	4.87805
A_55_P2424627	ref|NR_045459|ens|ENSMUST00000172874|gb|AK014779|tc|TC1616418	4833427F10Rik	4.87805
A_30_P01017585	Unknown	chr15:73227424-73257474_F	4.85437
A_55_P2099373	gb|AK135677|riken|7420403B16	Gm12633	4.85437
A_30_P01020475	Unknown	chr10:3229404-3229856_F	4.85437
A_55_P2061049	Unknown	A_55_P2061049	4.85437
A_55_P2351255	gb|AK016655|gb|AV278915|riken|4933404M09|nap|NAP073412-1	4933404M09Rik	4.85437
A_51_P114772	ref|NM_170588|ref|NM_170590|ens|ENSMUST00000147627|ens|ENSMUST00000109607	Cpne1	4.85437
A_55_P2004283	gb|AK156149|riken|F830009H16	AK156149	4.83092
A_30_P01026654	Unknown	chr15:73227424-73257474_R	4.83092
A_55_P1973573	ref|NM_001037810|gb|AK041712|tc|TC1669024|riken|A630031I19	Spn	4.83092
A_55_P2213483	gb|C78535	D7Ertd183e	4.80769
A_52_P573467	ref|NM_008644|ens|ENSMUST00000078656|ens|ENSMUST00000170832|gb|U37531	Prol1	4.80769
A_55_P2259248	gb|AK043585|tc|TC1612200|riken|A830010I12|nap|NAP082500-1	AI835086	4.80769
A_55_P1971009	ref|NM_010373|ens|ENSMUST00000015588|ens|ENSMUST00000089549|gb|X12821	Gzme	4.80769
A_55_P2185689	ref|NM_030106|ens|ENSMUST00000073674|gb|AK028086|gb|AK018998	Tmsb15a	4.80769
A_30_P01029646	Unknown	chr4:116790373-116797823_R	4.80769
A_30_P01018167	Unknown	chr13:74642700-74701900_R	4.80769
A_55_P2097393	ref|NM_026132|ens|ENSMUST00000102897|ens|ENSMUST00000154540|gb|AY495589	Txndc8	4.80769
A_30_P01031175	Unknown	chr1:52706748-52712402_R	4.78469
A_30_P01028510	Unknown	chr8:59966759-59989059_R	4.78469
A_55_P2212344	gb|AK017069|tc|TC1599827|riken|4933435G04|nap|NAP073597-1	4933435G04Rik	4.78469
A_51_P187491	ref|NM_053087|ens|ENSMUST00000041516|gb|AK010136|gb|AJ291391	Epgn	4.78469
A_55_P2047012	ref|NR_045158|gb|AK016770|ens|ENSMUST00000075909|tc|TC1589780	4933411G06Rik	4.78469
A_30_P01032341	Unknown	chr5:123440192-123451767_F	4.78469
A_55_P2015777	Unknown	A_55_P2015777	4.78469
A_55_P1962159	nap|NAP113342-1|nap|NAP115461-1|nap|NAP115218-1|nap|NAP102004-1	NAP113342-1	4.7619
A_30_P01023462	Unknown	chr3:108763862-108772151_R	4.7619
A_51_P134785	ref|NM_146771|ens|ENSMUST00000057439|gb|BC127992|tc|NP646818	Olfr1176	4.7619
A_55_P2010690	Unknown	A_55_P2010690	4.7619
A_51_P477481	ref|NM_026841|gb|BC060289|gb|AK004321|gb|BC094615	1110059M19Rik	4.7619
A_55_P2107117	tc|TC1664233|tc|TC1641867	TC1664233	4.7619
A_30_P01018888	Unknown	chr6:129151512-129208737_R	4.71698
A_55_P2162970	tc|TC1705286	TC1705286	4.71698
A_55_P2017164	ref|XM_001474034|ref|XM_985410	Gm8239	4.69484
A_30_P01029405	Unknown	chrX:151738814-151740969_R	4.69484
A_55_P2118081	ref|NM_001163353|ens|ENSMUST00000169764|ens|ENSMUST00000150895	Gm12171	4.69484
A_55_P1962439	gb|AK134839|riken|6330594M07	AK134839	4.69484
A_55_P2053439	ref|NM_008412|ens|ENSMUST00000107316|ens|ENSMUST00000053107|gb|BC160201	Ivl	4.69484
A_55_P1997696	ref|NM_025806|ens|ENSMUST00000032336|gb|AK003169|gb|AK003711	Plbd1	4.69484
A_30_P01017606	Unknown	chr12:33796826-33823746_F	4.6729
A_55_P1972104	ref|NM_212441|ref|NM_212442|ref|NM_016870|ens|ENSMUST00000106528	Acsm3	4.6729
A_55_P2176670	ref|XM_003085258|nap|NAP061168-1	Pabpc1l2b-ps	4.6729
A_55_P2416534	gb|AK142377|riken|D430027E22	5033428I22Rik	4.6729
A_51_P225903	ref|NM_173070|ens|ENSMUST00000062129|gb|AY158996|gb|BC107019	Sprr4	4.6729
A_30_P01019400	Unknown	chr16:94775095-94775634_F	4.6729
A_55_P2179605	Unknown	A_55_P2179605	4.6729
A_55_P2238132	ref|NR_040693|gb|AK006966|riken|1700081H04|nap|NAP091839-1	1700081H04Rik	4.6729
A_30_P01019696	Unknown	chr5:74340084-74346709_F	4.65116
A_30_P01027071	Unknown	chr8:124569775-124639500_F	4.65116
A_55_P2250514	gb|AK016828|gb|AV280626|tc|NP741502|riken|4933416A02	4933416A02Rik	4.65116
A_55_P1993080	Unknown	A_55_P1993080	4.65116
A_55_P2077515	Unknown	A_55_P2077515	4.65116
A_30_P01022891	Unknown	chr11:69106907-69112857_R	4.62963
A_55_P2173857	gb|AK015935|gb|AK016790|gb|ES316437|gb|BY715496	Orly	4.62963
A_30_P01027086	Unknown	chr12:12876192-12918398_F	4.62963
A_52_P48480	ref|NM_009356|ens|ENSMUST00000047840|gb|BC145989|gb|AK006524	Prss40	4.62963
A_51_P408784	gb|AK014688|ens|ENSMUST00000115074|riken|4833412N02|nap|NAP000834-002	Abcb8	4.62963
A_55_P2323466	gb|BI852147	AI463170	4.62963
A_30_P01025358	Unknown	chr11:70196232-70203307_F	4.60829
A_55_P2130997	gb|AK142706|riken|D830015D18	D830050J10Rik	4.60829
A_55_P2020361	ref|NM_197945|ens|ENSMUST00000045761|ens|ENSMUST00000089561|ens|ENSMUST00000110260	Prosapip1	4.60829
A_55_P1987855	Unknown	A_55_P1987855	4.60829
A_55_P1975412	ref|NM_146067|ens|ENSMUST00000145169|ens|ENSMUST00000096272|gb|AK029442	Cpped1	4.60829
A_55_P2337306	gb|AK017052|gb|AV284429|riken|4933434C23|nap|NAP013167-001	4933434C23Rik	4.60829
A_55_P2415150	ref|NR_040634|ens|ENSMUST00000142569|gb|AK009160|tc|TC1654050	2310005A03Rik	4.60829
A_30_P01033060	Unknown	chr1:59435775-59448812_F	4.60829
A_30_P01031090	Unknown	chr17:84359207-84360270_R	4.60829
A_30_P01024184	Unknown	chr1:87348082-87409907_F	4.60829
A_30_P01020459	Unknown	chr15:99762797-99786472_R	4.58716
A_55_P2088765	gb|AK015212|ens|ENSMUST00000111746|tc|TC1622628|riken|4930427H18	Sox5	4.58716
A_30_P01030396	Unknown	chr4:131903928-131909578_R	4.58716
A_30_P01023347	Unknown	chr16:91187988-91188416_R	4.58716
A_55_P1986612	Unknown	A_55_P1986612	4.58716
A_30_P01029165	Unknown	chr7:71221826-71222801_R	4.58716
A_52_P565847	ref|NM_001004153|ens|ENSMUST00000067969|ens|ENSMUST00000171749|ens|ENSMUST00000163910	AU018091	4.56621
A_51_P170959	gb|AK005011|tc|TC1601827|riken|1300015B06|nap|NAP009698-001	Proz	4.56621
A_51_P303696	ref|NM_001033547|ens|ENSMUST00000165785|ens|ENSMUST00000060041|gb|BC150917	4922505E12Rik	4.56621
A_52_P636987	ref|NM_001195271|ens|ENSMUST00000105113|ref|XM_912681|ref|XM_003085256	Gm362	4.56621
A_55_P2308117	gb|AK009506|tc|NP745049|riken|2310026I22|nap|NAP090730-1	2310026I22Rik	4.56621
A_30_P01017444	Unknown	chr10:93871635-93873477_F	4.56621
A_55_P1978890	ref|NM_001102474|gb|EF494894|gb|EF494895|gb|EF494896	Skint3	4.56621
A_30_P01019946	Unknown	chr2:22753100-22780375_R	4.56621
A_55_P2041137	ens|ENSMUST00000161581	ENSMUST00000161581	4.56621
A_30_P01027897	Unknown	chr12:72103832-72116875_F	4.56621
A_55_P2181538	ref|NM_016771|gb|BC066190	Sult1d1	4.54545
A_30_P01030897	Unknown	chr2:116798318-116802164_R	4.54545
A_55_P2053788	Unknown	A_55_P2053788	4.54545
A_55_P1970279	ref|NM_001033425|ens|ENSMUST00000133749|ens|ENSMUST00000095595|ens|ENSMUST00000115504	Zscan10	4.54545
A_55_P2053918	ref|XM_003086274	Gm14166	4.54545
A_30_P01019737	Unknown	chr12:21380896-21387071_F	4.52489
A_55_P2058487	ref|XR_105456|tc|TC1659526	Gm4419	4.52489
A_30_P01031309	Unknown	chr2:48805604-48974396_F	4.52489
A_66_P110606	ens|ENSMUST00000015981|gb|AK028898|tc|TC1582754|riken|4732468D23	Sqstm1	4.52489
A_55_P2292380	gb|AK021345|tc|TC1622650|riken|D730047E02|nap|NAP077517-1	D730047E02Rik	4.52489
A_30_P01025432	Unknown	chr18:61781410-61788685_R	4.52489
A_55_P2169989	ens|ENSMUST00000054218|ens|ENSMUST00000145094|tc|TC1676117	4930534B04Rik	4.52489
A_55_P2158324	Unknown	A_55_P2158324	4.52489
A_55_P1957729	ref|NM_139219|ens|ENSMUST00000057076|gb|BC109177|gb|AJ437647	Defb9	4.5045
A_30_P01022190	Unknown	chr18:32389816-32394927_F	4.5045
A_30_P01019131	Unknown	chr17:21752466-21793451_F	4.5045
A_55_P2283119	ref|XR_104822|ref|XR_107543|gb|AK040960|tc|TC1588031	A530020G20Rik	4.5045
A_55_P2245467	gb|AK016904|tc|TC1600593|riken|4933424P20|nap|NAP073485-1	4930452A19Rik	4.5045
A_55_P1972074	ref|NM_001104550|ens|ENSMUST00000170424|nap|NAP112830-1	Vmn2r98	4.5045
A_51_P452659	ref|NM_173008|ens|ENSMUST00000057612|gb|BC141044|gb|EU850434	A430110N23Rik	4.5045
A_66_P118047	gb|AK155799|riken|F730222N21	Gm4606	4.5045
A_55_P1976376	ref|NM_174990|ref|NM_001243200|ens|ENSMUST00000090070|ens|ENSMUST00000118802	Gimap4	4.5045
A_30_P01030248	Unknown	chr2:71576218-71603818_R	4.4843
A_55_P2006084	ref|XM_003084476|ref|XM_988496	Gm7897	4.4843
A_55_P2022798	Unknown	A_55_P2022798	4.4843
A_30_P01023374	Unknown	chr17:33425193-33449090_F	4.4843
A_55_P1998047	ref|NM_001025241|ref|NM_001017393|ref|NM_023546|ref|NM_001160136	LOC434960	4.4843
A_55_P2033972	ens|ENSMUST00000095853|ens|ENSMUST00000111479|nap|NAP064941-1	ENSMUST00000095853	4.4843
A_30_P01026782	Unknown	chr4:130039725-130069550_F	4.46429
A_55_P2036764	ref|NM_146026|ens|ENSMUST00000107633|ens|ENSMUST00000062172|ens|ENSMUST00000054311	Prr15l	4.46429
A_55_P1965564	ref|NM_001122734|ref|NM_001099920|ref|NM_001082966|ref|NM_001198988	Gm15085	4.46429
A_30_P01028701	Unknown	chr4:97106832-97107437_F	4.46429
A_30_P01023160	Unknown	chr3:26975624-26988699_F	4.46429
A_51_P113906	ref|NM_025467|ens|ENSMUST00000032128|gb|AK007451|gb|AK008986	Gkn2	4.44444
A_30_P01027818	Unknown	chr17:85418489-85427364_R	4.44444
A_55_P1993438	ref|NM_146933|ens|ENSMUST00000056002|gb|BC125495|gb|BC132182	Olfr790	4.44444
A_55_P2053564	ref|NM_001034898|ens|ENSMUST00000087923|gb|AK143446|tc|TC1592161	Ms4a15	4.44444
A_52_P471282	ref|NM_144878|ens|ENSMUST00000111525|ens|ENSMUST00000028014|gb|BC106858	Fmo4	4.44444
A_55_P2162727	ref|NM_183000|ens|ENSMUST00000049346|gb|BC054460|tc|TC1586261	Accn3	4.44444
A_55_P2171354	tc|TC1616796	TC1616796	4.44444
A_55_P2121190	Unknown	A_55_P2121190	4.44444
A_55_P2131213	ref|NM_001085506|gb|AK136064|ens|ENSMUST00000088481|tc|TC1680248	Magea10	4.44444
A_55_P2098530	ref|NM_001039666|ens|ENSMUST00000074253|gb|BC107359|gb|BC119522	Krt40	4.44444
A_55_P2330977	ref|NR_033620|gb|BC051435|tc|TC1595154	Olfr947-ps1	4.42478
A_55_P1960456	ref|NM_028451|ens|ENSMUST00000071487|gb|AK007597|gb|AK169738	Larp1	4.42478
A_30_P01025171	Unknown	chr15:60732209-60732822_R	4.42478
A_55_P2161923	ref|NM_001033960|ref|NM_146121|ens|ENSMUST00000130601|ens|ENSMUST00000066055	Rabgap1	4.42478
A_55_P2014973	nap|NAP067756-1	NAP067756-1	4.42478
A_30_P01021938	Unknown	chr15:66684765-66685491_F	4.42478
A_51_P262701	ref|NM_019775|ens|ENSMUST00000022576|gb|AK004045|gb|AB021968	Cpb2	4.42478
A_55_P2034525	Unknown	A_55_P2034525	4.40529
A_30_P01033673	Unknown	chr10:39666719-39679959_R	4.40529
A_51_P484671	ref|NM_138305|ref|NM_001159537|ref|NM_001159536|ens|ENSMUST00000127756	Adcy3	4.40529
A_51_P266248	gb|AK134885|gb|BC037128|tc|TC1650351|tc|TC1605289	Ighv14-2	4.38596
A_55_P2109932	ref|NM_198167|ens|ENSMUST00000113523|gb|AK159673|gb|AK090200	Tmem63b	4.38596
A_30_P01027512	Unknown	chr3:95443575-95462543_F	4.38596
A_51_P359137	ref|NM_021791|ens|ENSMUST00000147806|ens|ENSMUST00000025806|gb|AB046665	Doc2g	4.38596
A_30_P01027349	Unknown	chrX:157039851-157040326_F	4.38596
A_55_P1997220	ref|NM_138945|ens|ENSMUST00000025374|gb|BC145941|tc|NP518879	Pou4f3	4.38596
A_30_P01031654	Unknown	chr10:61486151-61488363_F	4.38596
A_55_P2105678	ref|NM_028481|ens|ENSMUST00000100945|ens|ENSMUST00000047677|gb|AK040158	Ccdc18	4.38596
A_30_P01025389	Unknown	chr16:64758224-64765700_F	4.38596
A_30_P01030984	Unknown	chr9:14460976-14488051_R	4.38596
A_55_P2362931	gb|AY512949|tc|TC1595317	AY512949	4.38596
A_52_P311042	ens|ENSMUST00000103481|gb|X67195|gb|X63801|gb|EU568218	ENSMUST00000103481	4.38596
A_30_P01026240	Unknown	chr15:77164450-77201325_F	4.38596
A_30_P01023711	Unknown	chr6:86448774-86450531_R	4.36681
A_55_P2228710	gb|AK017599|tc|TC1600331|riken|5730422E09|nap|NAP023287-001	5730422E09Rik	4.36681
A_55_P1964920	tc|TC1614033	TC1614033	4.34783
A_30_P01024107	Unknown	chrX:20378510-20379091_F	4.34783
A_30_P01029296	Unknown	chr5:122047900-122065325_F	4.34783
A_55_P2137984	Unknown	A_55_P2137984	4.34783
A_55_P2014710	ref|NM_021545	Naip7	4.34783
A_30_P01030805	Unknown	chr1:183811267-183816309_F	4.34783
A_55_P1967168	ref|NM_172668|ens|ENSMUST00000028689|ens|ENSMUST00000111341|gb|BC132240	Lrp4	4.34783
A_30_P01030870	Unknown	chr5:23363666-23371611_R	4.329
A_55_P2098195	ref|NM_146285|ens|ENSMUST00000072063|tc|TC1632441|nap|NAP021623-001	Olfr801	4.329
A_30_P01027920	Unknown	chr9:37063322-37063718_F	4.329
A_55_P2407110	gb|BX511707	AA416453	4.329
A_55_P1963920	ref|NM_001045526|ens|ENSMUST00000108534|gb|AK138818|riken|A430084P05	A430084P05Rik	4.329
A_55_P2024125	ref|NM_001170918|ref|NM_020512|ens|ENSMUST00000073571|gb|BC119163	Olfr1507	4.329
A_66_P115004	ref|NM_146017|ens|ENSMUST00000020366|gb|BC027245|gb|BC031196	Gabrp	4.329
A_51_P402994	ref|NM_012008|ens|ENSMUST00000091190|gb|AK154382|gb|AJ007376	Ddx3y	4.329
A_55_P1992351	ref|NR_003644|ens|ENSMUST00000049520|gb|AK075762|gb|BC048504	1700049L16Rik	4.329
A_30_P01032775	Unknown	chrX:92149320-92151107_R	4.329
A_30_P01028697	Unknown	chr15:74477943-74478029_F	4.329
A_30_P01019138	Unknown	chr14:76912477-76931702_R	4.31034
A_55_P2095558	gb|AK005548|gb|BY705763|riken|1600027J07|nap|NAP090822-1	1600027J07Rik	4.31034
A_55_P2017247	ref|NM_146785|gb|BC111098|tc|TC1600151|nap|NAP057850-1	Olfr915	4.31034
A_66_P130103	ref|NM_026024|ens|ENSMUST00000027687|gb|AK021213|gb|AK012565	Ube2t	4.31034
A_55_P2063626	ref|NM_010768|ens|ENSMUST00000117488|ens|ENSMUST00000105330|ens|ENSMUST00000150605	Matk	4.31034
A_55_P1985067	ens|ENSMUST00000114274|gb|AK142047|riken|D230012M05	Robo1	4.31034
A_30_P01028226	Unknown	chr1:63163023-63180223_R	4.31034
A_55_P2011862	ref|NM_008653|ens|ENSMUST00000137942|ens|ENSMUST00000028718|ens|ENSMUST00000169776	Mybpc3	4.31034
A_55_P2035996	Unknown	A_55_P2035996	4.29185
A_30_P01025379	Unknown	chr13:94182877-94203935_F	4.29185
A_30_P01031352	Unknown	chr1:38886199-38892924_F	4.29185
A_55_P2113310	ens|ENSMUST00000023262	ENSMUST00000023262	4.2735
A_55_P2178753	ref|NM_008121|ens|ENSMUST00000132256|ens|ENSMUST00000072600|gb|AY390401	Gja5	4.2735
A_55_P2161635	ref|NM_001126325|ref|NM_177571|ens|ENSMUST00000105772|ens|ENSMUST00000094522	Gm13088	4.2735
A_55_P2001935	nap|NAP069501-1	NAP069501-1	4.2735
A_30_P01028431	Unknown	chr19:27448093-27462793_F	4.2735
A_55_P1984932	ref|NM_001029993|ref|NM_001029994|ens|ENSMUST00000017622|ens|ENSMUST00000093073	Zc3h18	4.2735
A_55_P2222377	gb|BF788177	AA408650	4.2735
A_55_P1986823	ref|XR_105495|ref|XR_106719|gb|CO803228|tc|TC1674376	Gm8075	4.25532
A_55_P2169668	nap|NAP060597-1	NAP060597-1	4.25532
A_55_P2076378	ens|ENSMUST00000053635|gb|AK029660|tc|TC1592764|riken|4930432E11	ENSMUST00000053635	4.25532
A_30_P01030295	Unknown	chr7:48794017-48815817_R	4.25532
A_55_P1997195	Unknown	A_55_P1997195	4.25532
A_55_P2039518	ref|XR_106101|ref|XR_107249|gb|AK006139|gb|BU936470	1700019P21Rik	4.25532
A_30_P01023834	Unknown	chr5:124485370-124502361_R	4.23729
A_55_P2193487	gb|AA986695	AA986695	4.23729
A_66_P133151	ens|ENSMUST00000130532|gb|AK020435|riken|9430024E24|nap|NAP021485-001	ENSMUST00000130532	4.23729
A_55_P2332401	Unknown	A_55_P2332401	4.23729
A_30_P01024969	Unknown	chr17:26613904-26614277_F	4.23729
A_55_P1993483	Unknown	A_55_P1993483	4.21941
A_55_P2051832	Unknown	A_55_P2051832	4.21941
A_55_P2115772	Unknown	A_55_P2115772	4.21941
A_30_P01021907	Unknown	chr13:60508775-60534625_F	4.21941
A_51_P403942	ens|ENSMUST00000047020|ref|XM_003084687|ref|XM_003086559|gb|AK020867	LOC100503495	4.21941
A_55_P2149801	ens|ENSMUST00000147386|ens|ENSMUST00000145676|gb|AK040172|gb|BB206100	Abhd15	4.21941
A_30_P01027608	Unknown	chr6:117329899-117516899_F	4.20168
A_30_P01029135	Unknown	chr1:42759171-42771337_R	4.20168
A_51_P286978	ref|NM_029671|ens|ENSMUST00000031900|gb|AK006606|gb|BC048592	1700034O15Rik	4.20168
A_52_P484442	ref|NM_001037707|ref|NM_011754|ens|ENSMUST00000172448|ens|ENSMUST00000085788	Zfp27	4.20168
A_55_P2357721	gb|CK329697	CK329697	4.20168
A_55_P2140418	ref|NM_001037751|ens|ENSMUST00000100493|gb|AK136677|gb|DQ012044	Defb48	4.20168
A_66_P128733	ref|XR_105474|ref|XR_106690|gb|BC106175|tc|TC1656832	BC106175	4.1841
A_55_P2101696	ref|NM_008141|ens|ENSMUST00000130013|ens|ENSMUST00000142568|ens|ENSMUST00000058669	Gnat2	4.1841
A_30_P01021627	Unknown	chr1:182686731-182709331_F	4.1841
A_55_P2076545	ref|NM_007976|ens|ENSMUST00000086040|gb|AK137537|riken|9830132N20	F5	4.1841
A_51_P338476	ref|NM_145712|ens|ENSMUST00000057920|gb|AY255608|gb|U57554	Mtnr1b	4.1841
A_30_P01032834	Unknown	chr9:65647428-65677119_F	4.1841
A_55_P2019138	ref|NM_001043322|ref|NM_010230|ens|ENSMUST00000028542|ens|ENSMUST00000081349	Fmn1	4.1841
A_66_P124052	ref|NM_016778|ens|ENSMUST00000027499|gb|AF027707|gb|AK171258	Bok	4.16667
A_55_P1966274	ref|NM_001029868|ens|ENSMUST00000002080|gb|BC056462|ens|ENSMUST00000114438	Pdzd4	4.16667
A_55_P1995512	ref|NM_175408|ens|ENSMUST00000095987|gb|AK053212|gb|BC096053	Tmem139	4.14938
A_55_P2233462	gb|AK012274|tc|TC1604045|riken|2700022O18|nap|NAP091368-1	2700022O18Rik	4.14938
A_30_P01025094	Unknown	chr15:102026122-102033597_F	4.14938
A_66_P126848	ref|NM_001038697|gb|BC104362|ens|ENSMUST00000097029|nap|NAP103413-1	Gm5635	4.14938
A_55_P2057107	Unknown	A_55_P2057107	4.13223
A_55_P1990567	ref|NM_174991|ens|ENSMUST00000110015|ens|ENSMUST00000089710|ens|ENSMUST00000042035	Bai1	4.13223
A_30_P01019440	Unknown	chrX:120324027-120326909_R	4.13223
A_55_P1991401	ref|NM_027708|ens|ENSMUST00000031732|ens|ENSMUST00000136028|gb|AK016870	Fbxo24	4.13223
A_52_P1037027	ref|NR_040692|ens|ENSMUST00000142822|ens|ENSMUST00000124790|gb|AK014119	Gm10664	4.13223
A_55_P2061036	ens|ENSMUST00000156689|gb|AK144522|tc|TC1589541|riken|G630089A18	Fam83e	4.13223
A_30_P01027832	Unknown	chr18:6144775-6202232_F	4.13223
A_30_P01025337	Unknown	chr6:148162552-148176577_R	4.11523
A_55_P2185860	ref|NM_021400|ref|NM_001110146|ens|ENSMUST00000164600|ens|ENSMUST00000111902	Prg4	4.11523
A_55_P2162879	ref|NM_146384|tc|TC1600468|nap|NAP100551-001|nap|NAP108618-1	Olfr208	4.11523
A_30_P01033617	Unknown	chrX:92139043-92140820_R	4.09836
A_30_P01018120	Unknown	chr5:77188300-77205150_R	4.09836
A_55_P2136164	Unknown	A_55_P2136164	4.09836
A_30_P01026765	Unknown	chr8:72663625-72673010_R	4.08163
A_30_P01031407	Unknown	chr13:54399275-54445825_R	4.08163
A_55_P1971903	ref|NM_008867|ens|ENSMUST00000112525|ens|ENSMUST00000067708|ens|ENSMUST00000168748	Pla2r1	4.08163
A_55_P2054827	ref|NM_178717|ens|ENSMUST00000058007|gb|AK084001|tc|TC1586578	Rxfp3	4.06504
A_30_P01025488	Unknown	chr11:22681800-22707775_F	4.06504
A_30_P01018884	Unknown	chr7:137669440-137672712_F	4.06504
A_30_P01022577	Unknown	chr4:155585650-155608700_F	4.04858
A_55_P2050872	ref|NM_001029984|ens|ENSMUST00000094337|gb|AY513660|gb|DQ119292	Fcrlb	4.04858
A_30_P01022759	Unknown	chr7:106525007-106525661_R	4.04858
A_55_P2131583	Unknown	A_55_P2131583	4.04858
A_55_P2072925	Unknown	A_55_P2072925	4.04858
A_51_P421876	ref|NM_016850|ref|NM_001252601|ref|NM_001252600|ens|ENSMUST00000127223	Irf7	4.04858
A_55_P2009037	Unknown	A_55_P2009037	4.04858
A_66_P107068	nap|NAP029108-1	NAP029108-1	4.04858
A_55_P2204676	Unknown	A_55_P2204676	4.03226
A_51_P450518	ref|NM_028299|ens|ENSMUST00000149267|ens|ENSMUST00000146863|ens|ENSMUST00000037190	2700029M09Rik	4.03226
A_30_P01032095	Unknown	chr15:5446560-5549135_R	4.01606
A_55_P2114110	ref|NM_153112|ens|ENSMUST00000068023|gb|AK143204|tc|TC1647697	Cadm4	4.01606
A_30_P01030035	Unknown	chr18:6144775-6202105_F	4
A_55_P2004551	ref|NM_016659|ens|ENSMUST00000080955|ens|ENSMUST00000032288|gb|BC140968	Klra1	4
A_51_P447785	ref|NM_028089|ens|ENSMUST00000025966|gb|AY206875|gb|AK008580	Cyp2c55	4
A_30_P01028565	Unknown	chr5:77227402-77229990_R	4
A_51_P369330	ref|NM_146868|ens|ENSMUST00000093866|gb|BC148389|gb|BC153011	Olfr894	3.98406
A_52_P436522	ref|NM_026500|ens|ENSMUST00000129218|ens|ENSMUST00000027655|gb|AK013179	Ddx59	3.98406
A_30_P01024572	Unknown	chr11:49932129-49938154_R	3.98406
A_55_P2364703	ref|NR_040766|gb|AK050253|riken|C730031C05|nap|NAP077381-1	9430037G07Rik	3.98406
A_30_P01029686	Unknown	chr6:31017987-31174287_F	3.98406
A_55_P2168140	ref|XM_621386|ref|XM_905258|nap|NAP059999-1	Gm5958	3.98406
A_30_P01025250	Unknown	chr8:57977383-57985712_F	3.98406
A_30_P01018727	Unknown	chr9:95295459-95301266_F	3.98406
A_55_P2279852	gb|BG069336	AU019202	3.96825
A_30_P01023536	Unknown	chr1:85300475-85331475_F	3.96825
A_55_P2071829	ref|NM_001081242|ens|ENSMUST00000040025|ens|ENSMUST00000039509|tc|TC1613264	Tln2	3.96825
A_55_P2163389	ref|NM_146709|ens|ENSMUST00000052254|gb|BC138439|gb|BC138440	Olfr411	3.93701
A_51_P420128	ref|NR_045726|ens|ENSMUST00000151164|gb|AK006904|tc|TC1726273	1700066J24Rik	3.93701
A_55_P2056106	Unknown	A_55_P2056106	3.93701
A_55_P1990221	ens|ENSMUST00000128078|gb|CF969522|tc|TC1700694	ENSMUST00000128078	3.92157
A_55_P1989081	Unknown	A_55_P1989081	3.92157
A_30_P01031399	Unknown	chrX:8898275-8909200_F	3.92157
A_51_P181865	ref|NM_028053|ens|ENSMUST00000030127|gb|AB261159|gb|AK153075	Tmem38b	3.90625
A_55_P2180824	Unknown	A_55_P2180824	3.90625
A_55_P2157645	ref|XM_003085107	Gm17783	3.90625
A_66_P121059	ref|NR_028265|gb|AK081334|gb|AJ517767|gb|AK013406	Mirg	3.90625
A_30_P01023598	Unknown	chr3:35236023-35241498_R	3.89105
A_30_P01029688	Unknown	chr1:36095331-36095706_F	3.89105
A_30_P01018681	Unknown	chr5:125861675-125880125_F	3.89105
A_55_P2115435	ref|NM_013638|ens|ENSMUST00000050864|gb|AK132894|gb|BC090986	Prm3	3.89105
A_30_P01032672	Unknown	chr5:147538052-147546377_R	3.89105
A_30_P01022976	Unknown	chr4:131734714-131741964_F	3.87597
A_30_P01019878	Unknown	chr12:103151385-103157796_F	3.87597
A_30_P01019750	Unknown	chr17:32044823-32045974_R	3.87597
A_55_P1952256	ref|NM_172301|ens|ENSMUST00000134080|ens|ENSMUST00000072119|ref|XM_485921	Ccnb1	3.87597
A_30_P01028043	Unknown	chr4:3009566-3009932_R	3.87597
A_30_P01019798	Unknown	chrX:12755425-12772575_R	3.861
A_55_P2061170	ref|NM_198664|ens|ENSMUST00000084621|gb|BC022630|gb|AK148289	Tbc1d2	3.861
A_30_P01019299	Unknown	chr17:88890039-88905680_F	3.84615
A_51_P244824	ref|NM_011932|ens|ENSMUST00000029806|gb|AF186023|gb|AK169564	Dapp1	3.84615
A_52_P539250	ref|NM_027665|ens|ENSMUST00000050342|gb|AK016888|gb|AY190760	Adam30	3.83142
A_55_P2299374	gb|AK046275|riken|B230363O11|nap|NAP083282-1	4930588A03Rik	3.83142
A_51_P275053	ref|NM_024279|ens|ENSMUST00000010579|gb|AK018926|gb|BC048522	Spaca7	3.83142
A_51_P466829	ref|NM_175474|ens|ENSMUST00000056654|gb|AK033618|gb|AK081460	Fam109a	3.81679
A_52_P88054	ref|NM_007699|ens|ENSMUST00000045537|ens|ENSMUST00000170432|gb|S74916	Chrm4	3.81679
A_55_P1970785	gb|AK140579|gb|AK157539|tc|TC1603916|tc|TC1652722	AK140579	3.81679
A_30_P01033639	Unknown	chr3:27837825-27880925_R	3.81679
A_30_P01019037	Unknown	chr19:5834117-5835940_R	3.81679
A_55_P2178733	ref|NM_019636|ens|ENSMUST00000140960|ens|ENSMUST00000167647|ens|ENSMUST00000121370	Tbc1d1	3.80228
A_51_P438619	ref|NM_175407|ens|ENSMUST00000040275|gb|BC058972|gb|AK077362	Sobp	3.80228
A_55_P2171683	Unknown	A_55_P2171683	3.78788
A_51_P262670	ref|NM_019547|ens|ENSMUST00000130430|ens|ENSMUST00000029014|ens|ENSMUST00000155512	Rbm38	3.78788
A_55_P1964332	Unknown	A_55_P1964332	3.77358
A_30_P01023167	Unknown	chr2:104590593-104606218_F	3.77358
A_55_P2109983	ref|NM_010822|ens|ENSMUST00000144903|ens|ENSMUST00000142964|ens|ENSMUST00000020528	Mpg	3.7594
A_30_P01033069	Unknown	chr7:134649844-134651551_F	3.7594
A_52_P335466	ref|NM_001081270|ens|ENSMUST00000040855|ens|ENSMUST00000054307|ens|ENSMUST00000034592	Dscaml1	3.7594
A_55_P2208682	gb|AK081211|gb|AI853328|riken|C030005I17	B230334C09Rik	3.7594
A_55_P2132694	ref|NM_029291|ens|ENSMUST00000109932|ens|ENSMUST00000171367|ens|ENSMUST00000163518	Ascc2	3.7594
A_55_P1998504	tc|TC1691444|nap|NAP063565-1	TC1691444	3.7594
A_55_P2066598	ref|NM_011012|ref|NM_001252565|ref|NR_045540|ref|NR_045541	Oprl1	3.7594
A_30_P01021174	Unknown	chr8:19678750-20038750_F	3.7594
A_30_P01020408	Unknown	chr2:25774411-25783757_F	3.74532
A_55_P1975011	ref|NM_025388|ens|ENSMUST00000138974|ens|ENSMUST00000080001|gb|AK003897	Ufc1	3.74532
A_55_P2183715	Unknown	A_55_P2183715	3.74532
A_55_P2027496	ref|NM_172960|ens|ENSMUST00000161311|ens|ENSMUST00000023209|ens|ENSMUST00000161783	Adck5	3.74532
A_55_P2075041	ref|NM_172534|ens|ENSMUST00000050983|gb|AK029964|tc|TC1592792	4932411E22Rik	3.74532
A_55_P2104011	ref|XM_489506|ref|XM_622598|gb|BC100524|tc|TC1781583	Gm5767	3.74532
A_55_P2020502	Unknown	A_55_P2020502	3.74532
A_51_P234025	ref|NM_148930|ens|ENSMUST00000035199|gb|AK134183|gb|AK146880	Rbm5	3.74532
A_55_P2271058	gb|AF032130	Dep1	3.74532
A_30_P01030381	Unknown	chr17:88225376-88238756_F	3.74532
A_52_P108502	ref|NM_001033270|ens|ENSMUST00000074344|ens|ENSMUST00000164548|ens|ENSMUST00000057015	Slc4a7	3.74532
A_30_P01022990	Unknown	chr13:38757503-38767928_R	3.74532
A_55_P2044613	ref|NM_001256042|ref|NM_011939|ref|NM_001256044|ref|NR_045689	Hsf4	3.74532
A_55_P2061555	ref|NM_146513|ens|ENSMUST00000060728|gb|BC160270|tc|NP830904	Olfr95	3.74532
A_55_P2045711	ens|ENSMUST00000098595|ref|XR_106142|ref|XR_108065|gb|AK157878	ENSMUST00000098595	3.73134
A_30_P01019499	Unknown	chr7:126872550-126886125_R	3.73134
A_55_P1959142	Unknown	A_55_P1959142	3.73134
A_66_P132621	ref|NM_147026|ens|ENSMUST00000073226|gb|BC140398|gb|BC148690	Olfr532	3.73134
A_55_P1971518	Unknown	A_55_P1971518	3.71747
A_55_P2176087	ens|ENSMUST00000099960	Cox11	3.71747
A_55_P2024046	ref|NM_001080934|ens|ENSMUST00000106532|ens|ENSMUST00000133636|gb|BC052932	Slc16a5	3.71747
A_30_P01031588	Unknown	chr1:134167181-134181457_R	3.71747
A_66_P109368	ref|NM_029525|ref|NM_001033636|ens|ENSMUST00000027056|gb|AK136059	Prex2	3.71747
A_55_P1997215	Unknown	A_55_P1997215	3.71747
A_55_P2183750	ref|NM_008679|ens|ENSMUST00000088095|ens|ENSMUST00000099082|gb|BC093478	Ncoa3	3.7037
A_30_P01032113	Unknown	chr3:96074625-96086375_F	3.7037
A_30_P01023506	Unknown	chr18:61788148-61788307_R	3.7037
A_30_P01021255	Unknown	chr13:74738675-74756950_R	3.7037
A_55_P2099585	gb|X56569|gb|X56574|tc|NP053399|tc|TC1660695	Rarb	3.7037
A_55_P1995018	ref|NM_001177522|ref|NM_007851|ref|NM_001177528|ref|NM_001177486	Gm14850	3.69004
A_51_P492897	ref|NM_177607|ens|ENSMUST00000062145|gb|AK077205|tc|TC1591507	4933430I17Rik	3.69004
A_51_P400976	ref|NM_138954|ref|NM_001145013|ens|ENSMUST00000045215|gb|AK139569	Rfpl4	3.69004
A_30_P01032937	Unknown	chr1:74084292-74138492_F	3.69004
A_55_P2119687	gb|W17435	W17435	3.69004
A_55_P2129691	ref|NM_001198794|ref|NM_206536|ens|ENSMUST00000086361|ens|ENSMUST00000076326	AB124611	3.67647
A_30_P01022005	Unknown	chr11:119254413-119296960_F	3.67647
A_55_P2007791	ens|ENSMUST00000062557|gb|AK007108|tc|TC1674132|riken|1700101I19	ENSMUST00000062557	3.67647
A_30_P01032879	Unknown	chr3:152810906-152815072_R	3.663
A_30_P01020119	Unknown	chr15:102920547-102933472_F	3.663
A_52_P544476	ref|NR_001579|gb|BB660202	Terc	3.663
A_55_P1980257	ref|NM_028375|ens|ENSMUST00000114827	Cxx1c	3.64964
A_30_P01024832	Unknown	chr4:145450600-145461600_R	3.64964
A_52_P518922	ref|NM_001033228|ens|ENSMUST00000036276|ens|ENSMUST00000061673|gb|AK043769	Itga1	3.64964
A_55_P2030903	ref|NM_001162957|ens|ENSMUST00000169670|gb|AK038980|gb|AK045992	Rsph4a	3.64964
A_30_P01022853	Unknown	chr13:19618491-19618836_R	3.64964
A_30_P01022195	Unknown	chr13:64381475-64415350_F	3.64964
A_55_P2057370	ref|NM_144785|ens|ENSMUST00000025666|gb|AF529221|gb|BC021384	Slc22a19	3.64964
A_30_P01032920	Unknown	chr16:4867322-4874772_R	3.64964
A_52_P81693	ens|ENSMUST00000100870|ens|ENSMUST00000087848|ref|XM_003084652|nap|NAP027526-1	LOC100502592	3.64964
A_55_P2085302	ref|NM_001080817|ens|ENSMUST00000098915|ens|ENSMUST00000074510|nap|NAP030842-1	Prdm10	3.64964
A_55_P2187141	ref|NM_021396|ens|ENSMUST00000112576|gb|AK089369|gb|AK141111	Pdcd1lg2	3.63636
A_51_P379083	ref|NM_010086|ens|ENSMUST00000051614|gb|BC145785|gb|AK133199	Adam24	3.63636
A_55_P2035662	ref|NM_009636|ens|ENSMUST00000102923|ens|ENSMUST00000109829|gb|AK128980	Aebp1	3.63636
A_30_P01030508	Unknown	chr5:33779273-33780113_R	3.63636
A_55_P2130034	ref|NM_181419|ens|ENSMUST00000086280|ens|ENSMUST00000086281|gb|AK032725	Zfp599	3.63636
A_55_P2049323	ref|XR_106688|ref|XR_105446|gb|AK089512|riken|F730043H23	Gm4755	3.63636
A_55_P2258261	gb|AK050412|riken|C730046D02|nap|NAP077377-1	1810008I18Rik	3.63636
A_55_P1963957	nap|NAP069436-1	NAP069436-1	3.62319
A_55_P2092717	ref|NM_001170884|ens|ENSMUST00000163255|ens|ENSMUST00000087602|ens|ENSMUST00000167113	Trim43b	3.62319
A_55_P2173210	ref|XM_003084464|nap|NAP063609-1	Gm16340	3.62319
A_55_P2090429	ref|NM_010063|ref|NM_001191023|ref|NM_001191026|ref|NM_001191025	Dync1i1	3.62319
A_55_P2049572	ref|NM_008876|ens|ENSMUST00000108557|ens|ENSMUST00000018429|gb|AK170701	Pld2	3.62319
A_66_P109397	ref|NM_001081386|ens|ENSMUST00000094626|tc|TC1653205|tc|TC1632451	Cdh19	3.62319
A_51_P161362	ref|NM_145552|ens|ENSMUST00000030684|ens|ENSMUST00000147550|ref|XR_107628	Gnl2	3.62319
A_55_P2118784	ref|NM_054048|ens|ENSMUST00000066646|ens|ENSMUST00000025920|ens|ENSMUST00000113369	Rcor2	3.62319
A_55_P2016691	gb|AK006642|tc|TC1650325|riken|1700039I01|nap|NAP091744-1	1700039I01Rik	3.61011
A_55_P2315762	gb|AK045275|tc|TC1647431|riken|B130054P17|nap|NAP083065-1	AK045275	3.61011
A_30_P01031289	Unknown	chr1:6181200-6204300_R	3.61011
A_55_P2033690	ref|XM_003086875|tc|TC1691804	LOC637916	3.61011
A_66_P125847	ref|NM_139134|ens|ENSMUST00000023568|gb|AK031063|gb|AK076523	Chodl	3.61011
A_55_P2357254	gb|BB554159	5330430P22Rik	3.61011
A_55_P2027312	ref|NM_177613|ens|ENSMUST00000020550|ens|ENSMUST00000166603|ens|ENSMUST00000021240	Cdc34	3.61011
A_55_P2039463	ref|NM_024273|ref|NM_007473|ref|NM_176912|ref|NM_001146005	4930455C21Rik	3.61011
A_55_P2090996	ref|NM_026932|ens|ENSMUST00000030501|gb|AK167070|gb|AK007491	Ebna1bp2	3.59712
A_30_P01031613	Unknown	chr17:84470764-84486339_F	3.59712
A_55_P2002469	ens|ENSMUST00000067987|gb|AK020839|gb|BF120433|tc|TC1690415	ENSMUST00000067987	3.59712
A_30_P01020701	Unknown	chr13:19611679-19620954_R	3.59712
A_55_P2153620	ref|NM_001039959|ens|ENSMUST00000092955|ens|ENSMUST00000043246|ens|ENSMUST00000079602	Ahnak	3.59712
A_30_P01023572	Unknown	chr4:134866237-134867024_F	3.58423
A_30_P01027713	Unknown	chr5:92562352-92562839_F	3.58423
A_51_P149257	ref|NM_153104|ens|ENSMUST00000054173|gb|BC141532|gb|AJ457190	Phospho1	3.58423
A_52_P445360	ref|NM_023256|ens|ENSMUST00000017743|gb|AK008079|gb|AK018567	Krt20	3.58423
A_55_P2174736	ref|XR_106548|ref|XR_105368	Gm3515	3.57143
A_55_P1953545	ref|NM_001204973|ref|NM_010238|ref|NR_037970|ens|ENSMUST00000151986	Brd2	3.57143
A_55_P2126662	ref|NM_001243064|ref|NM_007616|ens|ENSMUST00000115456|ens|ENSMUST00000007799	Cav1	3.57143
A_51_P358066	ref|NM_153588|ref|NM_001122667|ens|ENSMUST00000009713|ens|ENSMUST00000149359	Mkl2	3.57143
A_30_P01023736	Unknown	chr5:125205454-125209470_F	3.57143
A_30_P01026013	Unknown	chr4:59093718-59108018_R	3.57143
A_55_P2050902	ref|NM_021564|ref|NM_001083905|ref|NM_001083904|ens|ENSMUST00000167399	Fetub	3.55872
A_55_P2028949	ref|NR_002880|gb|DQ012048	Defb48-ps	3.55872
A_55_P1952720	ref|NM_183285|ens|ENSMUST00000106533|ens|ENSMUST00000103035|ens|ENSMUST00000106534	Kctd2	3.55872
A_30_P01033332	Unknown	chr16:40463859-40464481_R	3.55872
A_30_P01018753	Unknown	chr7:67111261-67120645_F	3.55872
A_55_P1993858	ref|NR_001460	Rmrp	3.55872
A_55_P1959525	ref|NR_026907|gb|AK017044|gb|AY081954|tc|TC1588056	Wbscr25	3.55872
A_30_P01018634	Unknown	chr12:77544397-77564122_F	3.55872
A_52_P125253	ref|NM_146630|ens|ENSMUST00000054748|gb|BC148279|gb|BC148324	Olfr123	3.55872
A_55_P2106250	ref|NM_025960|ens|ENSMUST00000136873|ens|ENSMUST00000108455|ens|ENSMUST00000002112	Trappc6a	3.55872
A_30_P01030615	Unknown	chr7:119780610-119782250_F	3.55872
A_55_P1954292	ref|XM_003086811|nap|NAP113132-1|nap|NAP113228-1|nap|NAP058264-1	LOC100048702	3.55872
A_30_P01023052	Unknown	chr18:73863912-73864665_F	3.55872
A_55_P1982916	ref|NM_172449|ens|ENSMUST00000107939|ens|ENSMUST00000039627|ens|ENSMUST00000153578	Bzrap1	3.5461
A_30_P01027304	Unknown	chr14:77261377-77274982_F	3.5461
A_30_P01028595	Unknown	chr18:90750100-90772025_F	3.53357
A_55_P2001518	ref|NM_023898|ens|ENSMUST00000057650|gb|AK020922|gb|BC058192	Pde6h	3.53357
A_51_P308347	ref|NM_172826|ens|ENSMUST00000053218|gb|AY297430|gb|AK141226	Dact2	3.53357
A_55_P2006754	ens|ENSMUST00000044844|gb|AK149678|gb|AK171084|gb|AK154902	F630110N24Rik	3.53357
A_55_P2146640	gb|AV575311|tc|TC1770227	AV575311	3.53357
A_55_P2361437	ref|NM_145823|ens|ENSMUST00000166405|ens|ENSMUST00000103064|gb|AK034285	Pitpnc1	3.53357
A_52_P510877	ref|NM_009743|ens|ENSMUST00000128172|ens|ENSMUST00000089053|ens|ENSMUST00000007803	Bcl2l1	3.53357
A_51_P433778	ref|NM_009354|ens|ENSMUST00000022104|gb|AF051911|gb|BC082327	Tert	3.53357
A_51_P468456	ref|NM_011310|ens|ENSMUST00000001047|gb|BC100690|gb|BC099893	S100a3	3.52113
A_55_P1959973	ref|NM_175539|gb|AK076436|ens|ENSMUST00000115057|tc|TC1588022	Dcaf12l2	3.52113
A_52_P582555	ref|NM_172991|ens|ENSMUST00000163726|ens|ENSMUST00000042753|gb|AK047811	C030048B08Rik	3.50877
A_52_P62011	ref|NR_033518|gb|AK009885|gb|AK136084|gb|BC061003	Gm16039	3.50877
A_55_P2425442	gb|AI853652	D030036P13Rik	3.50877
A_55_P2082979	ref|NM_172161|ref|NM_001113553|ens|ENSMUST00000059286|ens|ENSMUST00000089022	Irak2	3.50877
A_55_P2129402	ref|XM_001477350|ref|XM_001477721|ref|XM_003084864|ref|XM_003085694	Gm9736	3.50877
A_30_P01020816	Unknown	chr7:144563845-144603732_R	3.4965
A_55_P2156126	ens|ENSMUST00000118651|ens|ENSMUST00000134125|ens|ENSMUST00000144312|ens|ENSMUST00000079897	Sema6c	3.4965
A_55_P2050513	ref|NM_001162919|ref|NM_001162920|ref|NM_001012311|ens|ENSMUST00000099719	Pgbd1	3.4965
A_55_P2041788	ref|NM_010302|gb|M63659|tc|TC1580301|nap|NAP012003-001	Gna12	3.4965
A_30_P01026027	Unknown	chr7:129294166-129301366_F	3.4965
A_52_P660477	ref|NM_012046|ref|NM_001083959|ref|NM_001083960|ens|ENSMUST00000144044	Spo11	3.4965
A_30_P01018436	Unknown	chr4:136856064-136875614_F	3.4965
A_55_P2135521	gb|AK035368|tc|TC1617596|riken|9530025M18|nap|NAP078774-1	Gm14703	3.48432
A_55_P1998697	Unknown	A_55_P1998697	3.48432
A_55_P2123162	ens|ENSMUST00000127358|gb|BY129299	Prr5l	3.48432
A_30_P01026290	Unknown	chr10:62262341-62271961_F	3.48432
A_55_P1979893	ref|NM_017376|ref|NM_153484|ens|ENSMUST00000052561|ens|ENSMUST00000109553	Tef	3.48432
A_51_P249104	ens|ENSMUST00000099638|gb|AK028639|ens|ENSMUST00000037284|tc|TC1591935	ENSMUST00000099638	3.48432
A_55_P1962304	ref|NM_139198|ens|ENSMUST00000031264|gb|AJ422151|gb|AK007369	Plac8	3.47222
A_55_P2017694	ref|NM_001110337|ens|ENSMUST00000053361|gb|AK049149|tc|TC1699602	Gprc5c	3.47222
A_51_P154083	ref|NM_019721|ens|ENSMUST00000173896|ens|ENSMUST00000174351|ens|ENSMUST00000022767	Mettl3	3.47222
A_55_P2048224	Unknown	A_55_P2048224	3.47222
A_55_P2019362	gb|AK145208|ens|ENSMUST00000100660|riken|G930020B17	Deptor	3.47222
A_55_P2164524	ref|NM_001033813|gb|AK137156|tc|TC1591246|riken|9530015I07	Zfp872	3.47222
A_30_P01029677	Unknown	chr2:22753100-22780375_F	3.47222
A_55_P2036452	ref|XM_001473693|ref|XM_913547|gb|AK132136|ens|ENSMUST00000173283	Gm7221	3.47222
A_55_P1992989	ref|NM_207207|ens|ENSMUST00000046149|gb|AK131626|gb|BC048517	Mrps26	3.47222
A_55_P2026715	ref|NM_175111|ens|ENSMUST00000023555|gb|AK038142|tc|TC1597680	Hspbap1	3.47222
A_30_P01028686	Unknown	chr4:155564927-155571580_R	3.46021
A_55_P2138744	ref|NR_027377|gb|AK141975|tc|TC1655159|riken|D130078L04	Gm17769	3.46021
A_55_P2069856	ref|NM_177296|ens|ENSMUST00000115251|ens|ENSMUST00000012679|gb|BC064646	Tnpo3	3.46021
A_30_P01025765	Unknown	chr4:44240894-44241570_R	3.46021
A_55_P2122066	ref|NM_001163415|ref|NM_011154|ref|NR_028110|gb|AK054122	Ppp2r3d	3.46021
A_55_P2154377	nap|NAP063250-1	NAP063250-1	3.46021
A_55_P2105512	ref|NM_024193|ens|ENSMUST00000153353|ens|ENSMUST00000150745|ens|ENSMUST00000103198	Nop56	3.44828
A_55_P2167655	tc|TC1775372	TC1775372	3.44828
A_55_P2114626	Unknown	A_55_P2114626	3.44828
A_55_P2046453	ref|NM_144829|ens|ENSMUST00000070395|gb|AK168281|gb|BC005711	Aarsd1	3.44828
A_30_P01026718	Unknown	chr1:39763924-39774099_F	3.43643
A_51_P239924	ref|NM_009090|ens|ENSMUST00000109521|gb|AK160053|gb|AK146763	Polr2c	3.43643
A_55_P2072453	ref|NM_001081361|ens|ENSMUST00000048462|ens|ENSMUST00000110992|gb|AK004989	Mosc1	3.43643
A_55_P2100272	gb|AK019622|ens|ENSMUST00000111208|tc|TC1654072|riken|4930449O14	Defb30	3.43643
A_55_P2148833	ens|ENSMUST00000015270|gb|BC038884|gb|AK169072|gb|BC027751	0610007P22Rik	3.43643
A_55_P2056166	gb|CJ049677	CJ049677	3.43643
A_51_P226962	ref|NM_015830|gb|AK148209|tc|TC1643688|tc|TC1619870	Solh	3.42466
A_55_P2116515	nap|NAP094932-001	NAP094932-001	3.42466
A_51_P473259	ref|NM_170778|ens|ENSMUST00000165462|ens|ENSMUST00000039177|gb|AK054474	Dpyd	3.42466
A_30_P01027948	Unknown	chr6:117829576-117834247_F	3.41297
A_51_P162144	ref|NM_021879|ens|ENSMUST00000144739|ens|ENSMUST00000032633|gb|AK087494	Oca2	3.41297
A_30_P01028563	Unknown	chr17:6817346-6819981_F	3.41297
A_55_P2424647	gb|AK030550|riken|5330430C19	AK030550	3.41297
A_55_P2377471	ref|NR_033534|gb|AK136150|riken|7420464G15	Olfr1300-ps1	3.40136
A_55_P2214841	ref|NM_010571|ens|ENSMUST00000057314|ens|ENSMUST00000169753|gb|BC098235	Irs3	3.40136
A_55_P2117731	ref|NM_027470|ens|ENSMUST00000108283|ens|ENSMUST00000032823|gb|AK088512	Pak4	3.40136
A_30_P01031156	Unknown	chr5:100845342-100869667_F	3.40136
A_51_P486308	ref|NM_001081012|ens|ENSMUST00000165373|ens|ENSMUST00000107202|ens|ENSMUST00000167158	4930473A06Rik	3.38983
A_55_P2317929	ens|ENSMUST00000068730|gb|AK017085|gb|BC049643|tc|TC1594677	ENSMUST00000068730	3.38983
A_55_P2106941	gb|AK032119|tc|TC1621536|riken|6330597M22|nap|NAP075032-1	AK032119	3.38983
A_55_P1973868	ref|NM_001042779|ref|NM_009153|ens|ENSMUST00000102530|ens|ENSMUST00000102531	Sema3b	3.38983
A_55_P2126394	ref|NM_008782|ens|ENSMUST00000172949|ens|ENSMUST00000174242|ens|ENSMUST00000143235	Pax5	3.38983
A_51_P324975	ref|NM_146776|ens|ENSMUST00000054364|gb|BC140456|tc|TC1614655	Olfr821	3.38983
A_55_P2025033	ref|NM_028760|ref|NM_001164362|ref|NM_028293|ens|ENSMUST00000116506	Cep55	3.37838
A_52_P19016	ref|NM_016680|ens|ENSMUST00000086041|gb|AK159443|gb|AF325456	Clasrp	3.37838
A_30_P01033544	Unknown	chr11:95097483-95097918_F	3.37838
A_30_P01026306	Unknown	chr19:57426515-57435165_R	3.37838
A_30_P01026901	Unknown	chr16:3111550-3130500_R	3.37838
A_55_P2322719	ens|ENSMUST00000134422|ref|XR_104740|ref|XR_107453|gb|AK016149	ENSMUST00000134422	3.37838
A_55_P2078690	Unknown	A_55_P2078690	3.37838
A_55_P2034517	ens|ENSMUST00000156066|ens|ENSMUST00000131423|gb|AK029684|gb|BB014467	Abcc12	3.367
A_55_P2025615	ref|NM_001242430|ref|NM_153515|ens|ENSMUST00000115808|ens|ENSMUST00000048298	Ammecr1l	3.367
A_30_P01026042	Unknown	chr19:61226425-61270975_R	3.367
A_30_P01020725	Unknown	chr16:14803358-14819925_R	3.367
A_55_P2100485	ref|NM_007939|ens|ENSMUST00000030420|gb|AK220393|gb|U72207	Epha8	3.367
A_55_P1978920	Unknown	A_55_P1978920	3.3557
A_55_P2410325	gb|AK011582|tc|TC1607827|riken|2610028D06	2610028D06Rik	3.3557
A_30_P01021434	Unknown	chr16:91174611-91200786_F	3.3557
A_30_P01030666	Unknown	chr6:47700758-47717846_F	3.3557
A_51_P198694	ref|NM_144909|ens|ENSMUST00000072228|gb|AK149377|gb|BC012412	Gckr	3.3557
A_30_P01018386	Unknown	chr17:41231055-41249764_R	3.3557
A_55_P2025635	Unknown	A_55_P2025635	3.3557
A_55_P2054728	ref|NM_178886|ens|ENSMUST00000111222|ens|ENSMUST00000058790|gb|AK032208	Ldlrad3	3.3557
A_55_P2117400	ens|ENSMUST00000092891|gb|AK032173|tc|TC1586849|riken|6430407F10	Cacng7	3.3557
A_30_P01025931	Unknown	chr12:113434415-113453161_F	3.34448
A_51_P453246	ref|NM_001160356|ens|ENSMUST00000096253|gb|BC029863|gb|AK131602	AI462493	3.34448
A_55_P2115582	ref|NM_015747|ens|ENSMUST00000110315|ens|ENSMUST00000028880|gb|M73696	Slc20a1	3.34448
A_55_P2022724	ref|NR_030716|ens|ENSMUST00000149978|tc|TC1679759	5430417L22Rik	3.34448
A_30_P01028974	Unknown	chr11:116562925-116574575_R	3.34448
A_52_P578723	ref|NM_177379|ref|NM_001195632|ens|ENSMUST00000168954|ens|ENSMUST00000047637	Arhgap32	3.34448
A_55_P2030790	nap|NAP059513-1	NAP059513-1	3.33333
A_55_P2167537	ref|NM_181549|ens|ENSMUST00000039597|gb|AK132888|tc|TC1626603	Clec18a	3.33333
A_30_P01027754	Unknown	chr14:65431652-65437902_R	3.33333
A_55_P2196037	gb|AK041714|riken|A630031M23	A630031M23Rik	3.32226
A_30_P01018667	Unknown	chr4:109071198-109078776_F	3.32226
A_55_P2034893	ref|NM_138657|ens|ENSMUST00000045540|gb|AK138734|tc|TC1615467	Socs7	3.32226
A_30_P01026651	Unknown	chr6:90848183-90861277_R	3.32226
A_55_P2120324	ref|NM_001003666|ref|NM_183027|ref|NR_033621|ens|ENSMUST00000049705	Zfp457	3.31126
A_55_P1957509	ref|NM_001039941|ref|NM_001039943|ref|NM_001039944|ref|NM_173412	Cypt8	3.31126
A_66_P139088	ens|ENSMUST00000128180|gb|AK080422|gb|BB639734|tc|TC1716203	ENSMUST00000128180	3.31126
A_55_P2328425	gb|AK080119|riken|A530064N14	A530064N14Rik	3.31126
A_30_P01031771	Unknown	chr7:118248833-118267766_R	3.31126
A_55_P1954448	ref|NM_028021|ens|ENSMUST00000107900|ens|ENSMUST00000048102|ens|ENSMUST00000107899	Myh14	3.31126
A_30_P01028712	Unknown	chr8:49853937-49874087_F	3.30033
A_55_P2007530	ref|NM_025728|ref|NM_029160|ens|ENSMUST00000065425|ens|ENSMUST00000161310	Spag16	3.30033
A_55_P1983848	ref|NM_028924|ref|NM_001082976|ens|ENSMUST00000110047|gb|AK016683	Tc2n	3.30033
A_55_P2168707	ens|ENSMUST00000135347|gb|AK009639|gb|GU266552|tc|TC1753813	ENSMUST00000135347	3.28947
A_55_P2022524	ref|NM_009035|ref|NM_001080927|ref|NM_001080928|ens|ENSMUST00000114639	Rbpj	3.28947
A_51_P462385	ref|NM_008061|ens|ENSMUST00000019469|gb|U00445|gb|AK050279	G6pc	3.28947
A_30_P01027382	Unknown	chr7:49829800-49843475_F	3.28947
A_55_P2027777	Unknown	A_55_P2027777	3.28947
A_55_P2180685	ref|NM_147055|ens|ENSMUST00000060440|ens|ENSMUST00000106859|gb|BC104080	Olfr649	3.28947
A_55_P2320840	gb|AK047372|tc|TC1608841|riken|B930053N02|nap|NAP020988-001	B930053N02Rik	3.28947
A_55_P2149274	ref|NM_001161338|ref|NM_024480|ens|ENSMUST00000154278|ens|ENSMUST00000073128	Sh3bp5l	3.28947
A_55_P2021330	Unknown	A_55_P2021330	3.28947
A_30_P01017830	Unknown	chrX:18810088-18814982_R	3.27869
A_30_P01020528	Unknown	chr9:121093500-121104550_F	3.27869
A_30_P01021258	Unknown	chr6:47969966-47970583_R	3.27869
A_30_P01021626	Unknown	chr7:91558475-91733625_R	3.26797
A_55_P2049922	ref|NM_026782|ens|ENSMUST00000128751|gb|BC022730|nap|NAP111679-1	1110021J02Rik	3.26797
A_55_P2141796	Unknown	A_55_P2141796	3.26797
A_55_P2089076	ref|NM_001099314|ens|ENSMUST00000107884|gb|CA481548|nap|NAP061895-1	Msmp	3.26797
A_55_P2256158	gb|AK043779|gb|AI843084|tc|TC1750421|riken|A830032D15	4930506C21Rik	3.26797
A_66_P103411	ens|ENSMUST00000150678|gb|AK042275|tc|TC1590460|riken|A630077M18	ENSMUST00000150678	3.26797
A_55_P2063047	ens|ENSMUST00000132973|gb|CF616562|nap|NAP071199-1	ENSMUST00000132973	3.26797
A_30_P01029892	Unknown	chr14:44284425-44300475_R	3.25733
A_55_P2041868	ref|NM_001081211	Ptafr	3.25733
A_52_P58524	ref|NM_010893|ens|ENSMUST00000007253|ens|ENSMUST00000173269|gb|BC004666	Neu1	3.25733
A_55_P2080649	ref|NM_183140|ref|NM_001145935|ref|NM_001145936|ens|ENSMUST00000106355	Zfp691	3.25733
A_30_P01031897	Unknown	chr12:33808493-33829143_F	3.25733
A_30_P01025679	Unknown	chr1:167797702-167798519_R	3.25733
A_52_P131353	ref|NM_177343|ens|ENSMUST00000100446|ens|ENSMUST00000114987|ens|ENSMUST00000044009	Camk1d	3.25733
A_55_P2188237	ens|ENSMUST00000125922|gb|AK013453|tc|TC1721177|riken|2810489J07	C530008M17Rik	3.24675
A_51_P384402	ref|NM_019454|ens|ENSMUST00000102517|gb|AK052322|gb|AK004739	Dll4	3.24675
A_30_P01025657	Unknown	chr13:73472571-73483846_F	3.24675
A_30_P01023198	Unknown	chr1:45800000-45834825_R	3.24675
A_55_P2030805	ref|NM_019785|ens|ENSMUST00000021479|gb|AK161642|gb|BC002227	Actr10	3.24675
A_55_P2219731	gb|BI134269	AI413759	3.24675
A_30_P01022422	Unknown	chr4:149383134-149451259_F	3.24675
A_51_P502422	ref|NM_025790|ens|ENSMUST00000006900|gb|AK144523|gb|AK002261	Acot13	3.24675
A_55_P2020706	ens|ENSMUST00000103162|gb|AK009015|gb|BC060287|ens|ENSMUST00000139855	Sgca	3.24675
A_55_P2042993	ref|NM_022989|ens|ENSMUST00000028336|gb|AK035521|gb|AK032740	Arl6ip6	3.24675
A_55_P2113375	Unknown	A_55_P2113375	3.23625
A_55_P2064386	gb|AK135408|riken|6820415M23	Gm4098	3.23625
A_55_P2097284	Unknown	A_55_P2097284	3.23625
A_55_P1996988	ref|NM_001164497|ref|NM_001164498|ref|NM_001164499|ens|ENSMUST00000118952	Papd5	3.23625
A_55_P2130555	ens|ENSMUST00000111272|tc|TC1714246	Prdm11	3.23625
A_51_P107807	ref|NM_147111|ens|ENSMUST00000084811|gb|AF121985|gb|BC101949	Olfr586	3.22581
A_55_P2164779	tc|TC1637029	TC1637029	3.22581
A_30_P01027075	Unknown	chr18:35977112-35977538_F	3.22581
A_30_P01026902	Unknown	chr5:111612191-111652286_F	3.21543
A_51_P106059	ref|NM_009423|ens|ENSMUST00000017530|ens|ENSMUST00000149437|gb|AK035056	Traf4	3.20513
A_30_P01033117	Unknown	chr13:94185501-94185936_F	3.20513
A_30_P01031707	Unknown	chr4:33338918-33378389_F	3.20513
A_55_P2359560	gb|AK082636|riken|C230073G13|nap|NAP023506-001	C230073G13Rik	3.20513
A_30_P01025870	Unknown	chr2:180161459-180189542_R	3.20513
A_55_P2119244	ref|NM_021403|ens|ENSMUST00000144211|gb|BC051947|tc|TC1585792	Srrm3	3.20513
A_30_P01030899	Unknown	chr2:132079092-132086642_F	3.19489
A_55_P2126259	ref|NM_177186|ens|ENSMUST00000105608|gb|BC058728|gb|AK142259	Slc35e2	3.19489
A_55_P2348409	gb|AK084992|gb|AI848933|riken|D430022A14	D430022A14Rik	3.19489
A_55_P2051094	ref|NM_011281|ens|ENSMUST00000107290|ens|ENSMUST00000029795|ens|ENSMUST00000107292	Rorc	3.19489
A_55_P2006410	Unknown	A_55_P2006410	3.19489
A_55_P1970636	ref|NM_133952|ens|ENSMUST00000107368|ens|ENSMUST00000032748|gb|BC004717	Unc45a	3.19489
A_55_P2381429	ens|ENSMUST00000139847|gb|AK013575|tc|TC1603455|riken|2900022L22	Lias	3.19489
A_30_P01027477	Unknown	chrX:92151384-92157256_R	3.18471
A_55_P2007981	ref|NM_019445|ens|ENSMUST00000085858|ens|ENSMUST00000030039|ens|ENSMUST00000165284	Fmn2	3.18471
A_30_P01030117	Unknown	chr8:56194344-56199712_F	3.1746
A_55_P2115318	ref|NM_174993|ref|NM_001166619|ref|NM_001166620|ens|ENSMUST00000071848	Fmr1nb	3.16456
A_55_P2058613	Unknown	A_55_P2058613	3.16456
A_51_P126198	ref|NM_010019|ens|ENSMUST00000034944|gb|BC022165|gb|AB018002	Dapk2	3.16456
A_30_P01023028	Unknown	chr13:74516152-74528284_R	3.16456
A_52_P251450	ref|NM_016675|ens|ENSMUST00000054889|gb|AK004990|gb|BC085494	Cldn2	3.16456
A_30_P01030507	Unknown	chr14:77036103-77036386_F	3.16456
A_55_P1995836	ref|XM_003085336	Gm14390	3.15457
A_30_P01019691	Unknown	chr12:3199327-3200827_F	3.15457
A_55_P1975660	ref|NM_053149|ens|ENSMUST00000107764|ens|ENSMUST00000071096|gb|AK171906	Hemgn	3.15457
A_55_P2423586	ref|NM_010164|ref|NM_001252192|ens|ENSMUST00000168081|ens|ENSMUST00000027066	Eya1	3.14465
A_55_P2319533	ens|ENSMUST00000155499|gb|AK018667|tc|TC1600330|riken|9130410C08	ENSMUST00000155499	3.14465
A_52_P299771	ref|NM_007535|ens|ENSMUST00000066460|gb|BC120720|gb|BC132545	Bcl2a1c	3.14465
A_30_P01021178	Unknown	chr11:55315017-55322092_R	3.14465
A_55_P2142116	Unknown	A_55_P2142116	3.14465
A_55_P2156366	gb|AK081017|tc|TC1667769|riken|B930054O08|nap|NAP083596-1	B930054O08	3.14465
A_30_P01031574	Unknown	chr12:112220578-112220962_F	3.14465
A_51_P279623	ref|NM_030240|ens|ENSMUST00000032918|gb|AK219667|gb|BC054744	2900092E17Rik	3.1348
A_30_P01025206	Unknown	chr13:51248372-51259297_R	3.1348
A_55_P2040763	ref|NM_027016|ens|ENSMUST00000029256|gb|AK088093|gb|BC023720	Sec62	3.1348
A_30_P01027879	Unknown	chr6:47959825-47960502_R	3.1348
A_55_P2136289	ens|ENSMUST00000019386|gb|BC057871|ens|ENSMUST00000113743|tc|TC1578135	Ripk4	3.1348
A_55_P1999947	ref|XM_914045|ref|XM_989129	4930485B16Rik	3.1348
A_55_P1962164	ref|XR_030795|ref|XR_031644|ens|ENSMUST00000163475|tc|TC1642804	2610021A01Rik	3.1348
A_30_P01029435	Unknown	chr6:99472981-99484210_F	3.1348
A_55_P2027412	Unknown	A_55_P2027412	3.125
A_51_P108226	ref|NM_183249|ens|ENSMUST00000070832|gb|AK003352|gb|AK003164	1100001G20Rik	3.125
A_51_P153693	ref|NM_001001981|ref|NM_001136226|ens|ENSMUST00000151622|ens|ENSMUST00000053760	Utp14b	3.125
A_55_P1956882	ref|NM_009948|ref|NR_004843|ens|ENSMUST00000052315|ens|ENSMUST00000109313	Cpt1b	3.125
A_30_P01027497	Unknown	chr5:37051650-37110575_F	3.125
A_55_P1995473	ref|NM_013641|ens|ENSMUST00000159935|gb|AK218198|gb|AK164746	Ptger1	3.125
A_55_P1967320	nap|NAP114236-1	NAP114236-1	3.125
A_55_P2170263	Unknown	A_55_P2170263	3.125
A_66_P130115	ref|NM_019699|ens|ENSMUST00000025567|gb|HQ264057|gb|HQ264058	Fads2	3.125
A_51_P308597	ref|NM_008104|ens|ENSMUST00000021791|gb|D88611|gb|AK135689	Gcm2	3.125
A_55_P1954212	ref|NM_026943|ens|ENSMUST00000049294|ens|ENSMUST00000080358|ref|XM_001480921	Snrpd2	3.125
A_30_P01020110	Unknown	chr5:110424250-110443025_R	3.125
A_30_P01018573	Unknown	chr3:127170996-127201096_R	3.11526
A_30_P01021550	Unknown	chr19:55715078-55776694_R	3.11526
A_55_P2016962	Unknown	A_55_P2016962	3.11526
A_66_P140974	ref|NM_001081047|ens|ENSMUST00000144504|ens|ENSMUST00000030645|gb|BC113805	Cnksr1	3.11526
A_55_P2090718	ref|NM_026398|ens|ENSMUST00000140083|ens|ENSMUST00000081497|gb|AK005290	Pop5	3.11526
A_55_P2139942	ref|NM_007587|ens|ENSMUST00000032907|gb|AK132582|gb|X97991	Calca	3.11526
A_51_P237865	ref|NM_021283|ref|NR_027491|ens|ENSMUST00000000889|gb|M25892	Il4	3.10559
A_55_P2179610	Unknown	A_55_P2179610	3.10559
A_30_P01030610	Unknown	chr9:75330657-75332641_F	3.10559
A_55_P1986552	ref|NM_023061|ens|ENSMUST00000098852|ens|ENSMUST00000034650|gb|AB035508	Mcam	3.10559
A_55_P1997831	ref|NM_028146|ref|NM_001170975|ens|ENSMUST00000074879|ens|ENSMUST00000171501	Dbndd1	3.10559
A_51_P117903	ens|ENSMUST00000103467|ens|ENSMUST00000103463|gb|EU568223|gb|U37848	ENSMUST00000103467	3.09598
A_30_P01026293	Unknown	chr19:46419916-46421753_F	3.09598
A_55_P1966538	ref|NM_153775|ens|ENSMUST00000131934|ens|ENSMUST00000154099|ens|ENSMUST00000116412	Ctu2	3.09598
A_51_P211822	ref|NM_001013414|ens|ENSMUST00000133203|ens|ENSMUST00000061837|ens|ENSMUST00000108617	Neurl4	3.09598
A_55_P2049835	ref|NM_008751|ens|ENSMUST00000162942|gb|AK083014|gb|AK139424	Nxph1	3.08642
A_55_P2094474	ref|NM_001177394|ref|NM_001177395|gb|BC031611|gb|BC065800	Gm13476	3.08642
A_55_P2111530	ens|ENSMUST00000127261|gb|AK053981|tc|TC1592464|riken|E230008N13	ENSMUST00000127261	3.08642
A_55_P1974961	ref|NM_153804|ens|ENSMUST00000075249|ens|ENSMUST00000101279|gb|AK172977	Plekhg3	3.08642
A_30_P01033410	Unknown	chr13:34693404-34717987_F	3.08642
A_51_P361620	ens|ENSMUST00000051089|gb|BC019122|tc|TC1592191|nap|NAP030915-1	ENSMUST00000051089	3.08642
A_55_P2052420	ref|NM_028385|ens|ENSMUST00000113157|ens|ENSMUST00000042889|gb|AK088328	Setd5	3.08642
A_30_P01019917	Unknown	chr8:34646787-34680312_F	3.08642
A_51_P362538	ref|NM_001166064|ens|ENSMUST00000039517|gb|AK132784|gb|AK049496	Syde2	3.08642
A_51_P124748	ref|NM_009368|ens|ENSMUST00000003687|gb|AK162560|gb|AK132519	Tgfb3	3.07692
A_55_P2053273	ens|ENSMUST00000113289|tc|TC1627523	St6galnac6	3.07692
A_55_P2038559	ref|NR_033504|ens|ENSMUST00000085241|gb|AK049950|tc|TC1594724	Gm9962	3.07692
A_55_P2142425	ref|XR_105044|ref|XR_106378|ref|XR_106384|ref|XR_106379	Gm19333	3.07692
A_30_P01021818	Unknown	chrX:165792277-165807952_R	3.07692
A_55_P1963483	ref|NM_030559|ens|ENSMUST00000134677|ens|ENSMUST00000028900|ens|ENSMUST00000110271	Vps16	3.06748
A_55_P1974452	ref|NM_023684|ens|ENSMUST00000116366|ens|ENSMUST00000126862|ens|ENSMUST00000131284	Lime1	3.06748
A_55_P1954940	gb|AK136006|gb|BB060123|riken|7420445K07	Gm4203	3.06748
A_30_P01021611	Unknown	chr17:12990484-13018375_R	3.06748
A_55_P2171802	ref|NM_177882|ens|ENSMUST00000058844|gb|AK080438|tc|TC1586198	Zfp786	3.06748
A_30_P01020106	Unknown	chr2:27628702-27628903_R	3.06748
A_30_P01025564	Unknown	chr17:5795893-5835243_F	3.06748
A_30_P01029812	Unknown	chr8:28345511-28361105_R	3.06748
A_55_P1997225	ref|NM_001033263|ens|ENSMUST00000105254|ens|ENSMUST00000039259|gb|AK220325	Agap2	3.06748
A_51_P469578	ref|NM_011965|ens|ENSMUST00000172411|ens|ENSMUST00000033008|gb|AK144784	Psma1	3.0581
A_52_P198885	ref|NM_207651|ref|NM_001110273|ens|ENSMUST00000154070|gb|AK032837	Slc14a2	3.0581
A_55_P2040878	ref|NM_001040691|ref|NM_011677|ens|ENSMUST00000112275|ens|ENSMUST00000102584	Ung	3.0581
A_52_P15674	ens|ENSMUST00000056086|gb|AK015362|tc|TC1595784|riken|4930442H23	ENSMUST00000056086	3.0581
A_55_P2155727	ref|NM_194350|ens|ENSMUST00000062002|gb|BC156190|tc|TC1720001	Mafa	3.0581
A_30_P01026576	Unknown	chr2:153643200-153654975_R	3.04878
A_55_P2125663	ref|NR_003283|ens|ENSMUST00000145652|gb|AK049292|riken|C330020A07	Gm11202	3.04878
A_55_P2144512	Unknown	A_55_P2144512	3.04878
A_55_P2137416	Unknown	A_55_P2137416	3.04878
A_55_P2018280	tc|TC1629449|nap|NAP102146-1|nap|NAP113067-1|nap|NAP102152-1	TC1629449	3.04878
A_55_P2243092	gb|BQ174124	A330102I10Rik	3.04878
A_55_P2072110	ref|NM_011889|ens|ENSMUST00000116423|ens|ENSMUST00000023095|gb|AK164861	2014-09-03	3.04878
A_55_P2042615	ens|ENSMUST00000135268|gb|AK082716|tc|TC1594394|riken|C230094I18	ENSMUST00000135268	3.03951
A_30_P01032640	Unknown	chrX:148732853-148761972_R	3.03951
A_55_P2162747	ref|NM_183022|ens|ENSMUST00000037708|gb|BC055772|gb|BC046481	Accn4	3.03951
A_55_P2077801	gb|BB042210	BB042210	3.0303
A_55_P2099526	ref|NM_029938|ens|ENSMUST00000060240|ens|ENSMUST00000093346|ens|ENSMUST00000109737	H2afv	3.0303
A_55_P2053597	Unknown	A_55_P2053597	3.0303
A_51_P143190	ref|NM_008535|ens|ENSMUST00000037165|gb|X57687|gb|AK076114	Lyl1	3.02115
A_55_P2121484	ref|NM_176996|ens|ENSMUST00000001812|gb|AF089721|gb|BC030377	Smo	3.02115
A_55_P2000595	Unknown	A_55_P2000595	3.02115
A_55_P2161278	ens|ENSMUST00000098328|gb|AK139339|gb|AK220503|riken|A830015E22	Spata2l	3.02115
A_30_P01026583	Unknown	chr3:100363012-100369971_F	3.01205
A_52_P58359	ref|NM_021901|ens|ENSMUST00000026236|gb|BC018246|tc|TC1593082	Tlx1	3.01205
A_55_P2054332	ref|NM_010143|ens|ENSMUST00000085925|ens|ENSMUST00000006112|ens|ENSMUST00000159575	Ephb3	3.01205
A_55_P2169559	ref|NM_021349|ens|ENSMUST00000139422|ens|ENSMUST00000101103|gb|AF257673	Tnfrsf13b	3.01205
A_55_P1954680	ref|NR_033532|gb|AK038776|gb|AK080797|tc|NP719858	B230206H07Rik	3.01205
A_52_P550185	ref|NM_026615|ens|ENSMUST00000123021|ens|ENSMUST00000091142|gb|AK049227	Urm1	3.01205
A_55_P2002150	ref|NM_133757|ens|ENSMUST00000155507|ens|ENSMUST00000132676|ens|ENSMUST00000017859	Pgs1	3.01205
A_55_P2063965	ref|NM_008156	Gpld1	3.003
A_30_P01026346	Unknown	chr15:102026122-102033725_F	3.003
A_51_P436652	ref|NM_013654|ens|ENSMUST00000021011|gb|L04694|gb|S50588	Ccl7	3.003
A_55_P2167447	ref|NM_001039551|ref|NM_053186|ens|ENSMUST00000097776|ens|ENSMUST00000001166	Cnnm3	3.003
A_55_P2015202	gb|AK051305|riken|D130032F16|nap|NAP085509-1	AK051305	2.99401
A_55_P2192532	gb|AK015302|riken|4930433G11|nap|NAP116098-1|nap|NAP057923-1	4933432K03Rik	2.99401
A_66_P116300	ens|ENSMUST00000057722|ref|XR_035252|ref|XR_035310|gb|AK076795	ENSMUST00000057722	2.99401
A_55_P1961736	ref|NM_207649|ref|NM_030598|ens|ENSMUST00000044895|ens|ENSMUST00000044792	Rcan2	2.99401
A_30_P01027966	Unknown	chr1:195327945-195336595_F	2.99401
A_55_P2093211	ref|NM_026205|ens|ENSMUST00000008626|gb|AK005854|gb|AK005850	Rnf151	2.99401
A_30_P01019875	Unknown	chr5:110182844-110228345_R	2.99401
A_55_P2017944	ref|NM_026695|ens|ENSMUST00000004729|gb|AK013284|gb|BC069877	Etfb	2.99401
A_51_P380709	ref|NM_029761|ref|NM_001163686|ens|ENSMUST00000029075|gb|AF418208	Dok5	2.98507
A_30_P01024231	Unknown	chr9:41300137-41301556_F	2.98507
A_55_P2179990	ref|NM_001039119|ens|ENSMUST00000098908|gb|DQ012041|gb|BC145764	Defb33	2.98507
A_55_P2428514	ref|NM_001204959|ens|ENSMUST00000012849|gb|AK131869|gb|AK131613	Retn	2.98507
A_51_P104939	ref|NM_008463|ens|ENSMUST00000014683|gb|BC120550|gb|BC137708	Klra5	2.97619
A_52_P638459	ref|NM_013653|ens|ENSMUST00000035938|gb|BC033508|gb|AK003101	Ccl5	2.97619
A_55_P2163028	ref|NM_010499|ens|ENSMUST00000060427|gb|AK144601|gb|AK150860	Ier2	2.97619
A_30_P01028109	Unknown	chr2:150091945-150119782_F	2.97619
A_51_P497100	ref|NM_010706|ens|ENSMUST00000126603|ens|ENSMUST00000066723|ens|ENSMUST00000137468	Lgals4	2.97619
A_55_P2171912	ref|NM_016975|ens|ENSMUST00000061614|gb|BC138492|gb|BC138493	Gja3	2.97619
A_55_P2004767	ref|NM_001013810|ens|ENSMUST00000079759|ref|XM_911088|ref|XM_001002281	Gm5591	2.96736
A_55_P2345939	gb|AK015485|tc|TC1691490|riken|4930458K08|nap|NAP074171-1	4930458K08Rik	2.96736
A_30_P01029460	Unknown	chr2:145492995-145523670_R	2.96736
A_66_P102706	ref|XR_105263|ref|XR_108091|gb|AK012238|tc|TC1625540	2700012I20Rik	2.96736
A_55_P2067881	Unknown	A_55_P2067881	2.96736
A_55_P1973699	ref|NM_019752|ens|ENSMUST00000154829|ens|ENSMUST00000122955|ens|ENSMUST00000089645	Htra2	2.96736
A_55_P2084686	ref|NM_146156|ref|NM_001163794|ens|ENSMUST00000105876|ens|ENSMUST00000061234	Pdik1l	2.96736
A_55_P1960924	ref|NM_053208|ens|ENSMUST00000080058|gb|AK152056|gb|AK152223	Egln2	2.95858
A_55_P2024461	ref|NM_198100|ens|ENSMUST00000107615|ens|ENSMUST00000066078|ens|ENSMUST00000092755	Tbkbp1	2.95858
A_30_P01029824	Unknown	chr6:11996975-12037300_F	2.95858
A_66_P102526	gb|AK015254|tc|TC1627861|riken|4930430K04|nap|NAP100751-001	Zcwpw2	2.95858
A_30_P01021578	Unknown	chr8:123649699-123649970_R	2.94985
A_66_P131708	ref|NM_027318|ens|ENSMUST00000085941|ens|ENSMUST00000156963|gb|BC026751	Znhit1	2.94985
A_51_P354345	ref|NM_015785|ref|NM_001185153|ens|ENSMUST00000020413|gb|BC139450	Zpbp	2.94985
A_52_P319066	ref|NM_175366|ens|ENSMUST00000082237|gb|AK173330|gb|BC031512	Mex3b	2.94985
A_55_P2115225	ref|NM_007986|ens|ENSMUST00000102732|gb|BC019190|gb|Y10007	Fap	2.94985
A_51_P256224	ref|NM_146202|ens|ENSMUST00000170568|ens|ENSMUST00000060783|gb|AK155155	Zfp768	2.94118
A_51_P501622	ref|NR_027915|gb|AK018960|gb|AK007155|gb|AK018969	1700120K04Rik	2.94118
A_51_P106591	ref|NM_172434|ens|ENSMUST00000029784|gb|AK044506|gb|BC031740	Celf3	2.93255
A_55_P1966372	ref|NM_172592|ens|ENSMUST00000074616|ens|ENSMUST00000109322|gb|AK033354	Srek1	2.93255
A_55_P2059120	ens|ENSMUST00000107663|tc|TC1715973	Skap1	2.93255
A_30_P01028495	Unknown	chr14:105988692-105994145_F	2.93255
A_52_P353541	ref|NM_177598|ens|ENSMUST00000061456|ens|ENSMUST00000163839|ens|ENSMUST00000173606	Fbxw13	2.93255
A_55_P1972852	ref|NM_016766|ref|NM_001164156|ens|ENSMUST00000041190|ens|ENSMUST00000163506	Mcrs1	2.93255
A_55_P1991219	ref|NM_011486|ref|NM_213660|ref|NM_213659|ens|ENSMUST00000156645	Stat3	2.92398
A_55_P1966377	ref|NM_029142|ens|ENSMUST00000069209|gb|BC115663|gb|BC115664	4930502E18Rik	2.92398
A_30_P01017627	Unknown	chr17:26679595-26688270_R	2.92398
A_30_P01027051	Unknown	chr8:72663625-72673010_F	2.92398
A_30_P01030369	Unknown	chr18:70400082-70404236_R	2.92398
A_55_P2305005	gb|AK020767|riken|A430105J06|nap|NAP076109-1	A430105J06Rik	2.91545
A_51_P112627	ref|NM_009180|ens|ENSMUST00000135771|gb|X93999|gb|AK004613	St6galnac2	2.91545
A_30_P01021044	Unknown	chr5:91480533-91502237_R	2.91545
A_55_P2088296	ref|NM_194345|ens|ENSMUST00000022690|gb|BC058108|gb|BC050861	Fam160b2	2.91545
A_55_P2082880	Unknown	A_55_P2082880	2.90698
A_30_P01032625	Unknown	chr4:40720362-40729687_F	2.90698
A_51_P255271	ref|NM_019821|ens|ENSMUST00000012028|gb|AF209703|gb|BC053729	Gltp	2.90698
A_55_P2101426	ref|NM_025578|ens|ENSMUST00000140438|gb|AK004037|gb|BC022953	Mrps25	2.90698
A_55_P2078048	ref|NM_030561|ens|ENSMUST00000064709|ens|ENSMUST00000064683|gb|AK151327	BC004004	2.90698
A_55_P2072403	ref|NM_022724|ref|NR_027509|ens|ENSMUST00000027956|gb|AK083457	Suv39h2	2.90698
A_30_P01023108	Unknown	chr7:26212709-26230775_F	2.90698
A_55_P2063568	ref|NR_003959|ens|ENSMUST00000080123|gb|AK006425|gb|AK016920	Aldoart2	2.90698
A_30_P01023945	Unknown	chrX:12758189-12760546_F	2.89855
A_55_P2061591	ref|NM_027357|gb|AK159750|gb|AK153386|gb|AK159123	Psmd1	2.89855
A_55_P2093286	ref|NM_007470|ens|ENSMUST00000130560|ens|ENSMUST00000115230|gb|AK157917	Apod	2.89855
A_55_P2244142	gb|BC030682|gb|BC052788|nap|NAP124228-1	Klf13	2.89855
A_52_P25420	ref|NM_018873|ens|ENSMUST00000107593|ens|ENSMUST00000107590|ens|ENSMUST00000107596	Srcin1	2.89855
A_30_P01031646	Unknown	chrX:93154123-93164481_R	2.89855
A_51_P273679	ref|NM_028772|ens|ENSMUST00000048001|gb|AK004755|gb|BC024126	Dmgdh	2.89017
A_51_P254262	ref|NM_130858|ens|ENSMUST00000058866|gb|AK038955|gb|AK158760	Nxph3	2.89017
A_52_P606065	ens|ENSMUST00000126189|ens|ENSMUST00000074198|ref|XM_887141|ref|XM_910045	ENSMUST00000126189	2.89017
A_55_P2167070	ref|NM_008447|ens|ENSMUST00000169813|gb|BC058396|tc|TC1575166	Kif5a	2.89017
A_55_P1978633	ref|NR_027707|ref|XM_904788|gb|BC049655|tc|TC1644679	Gm5166	2.89017
A_55_P2019690	ref|NM_001081349|ref|NM_001083809|ref|NM_024497|ens|ENSMUST00000121114	Slc43a1	2.89017
A_55_P2175489	gb|AK038793|ens|ENSMUST00000113787|tc|TC1687209|tc|TC1617567	Sfxn5	2.88184
A_51_P344346	ref|NM_001081665|ens|ENSMUST00000044729|ens|ENSMUST00000169699|gb|BC116335	Ccdc129	2.88184
A_30_P01019316	Unknown	chr3:62727150-62758225_F	2.88184
A_55_P2110185	ref|NM_025855|ref|NM_001110195|ens|ENSMUST00000020034|gb|AK028775	Echdc1	2.88184
A_66_P103894	ens|ENSMUST00000057205|gb|AK080584|tc|TC1619248|tc|TC1694977	Zdhhc22	2.88184
A_55_P2076481	gb|AK145429|tc|TC1645663|riken|I0C0043M05	AK145429	2.88184
A_52_P423174	ref|NM_146230|ens|ENSMUST00000010795|gb|AY273812|gb|AK145953	Acaa1b	2.88184
A_55_P2177243	ref|NM_145920|ens|ENSMUST00000101258|ens|ENSMUST00000167562|ens|ENSMUST00000056365	Evc2	2.88184
A_51_P427828	ens|ENSMUST00000167236|ens|ENSMUST00000093816|gb|AK009836|gb|BC144730	2310046A06Rik	2.87356
A_55_P2164744	ref|NM_001145874|gb|AK142548|ens|ENSMUST00000115116|riken|D630032A04	Muc20	2.87356
A_55_P2028570	ref|NM_018822|ens|ENSMUST00000005173|ens|ENSMUST00000136523|gb|AK076267	Sgsh	2.87356
A_55_P2003266	ref|NM_183187|ens|ENSMUST00000120411|ens|ENSMUST00000121887|ens|ENSMUST00000036070	Fam107a	2.87356
A_30_P01020974	Unknown	chr8:114477602-114488627_F	2.87356
A_52_P489729	ref|NM_016906|ens|ENSMUST00000032168|gb|AK088473|gb|AK153055	Sec61a1	2.87356
A_55_P2386236	ref|NM_001113368|ref|NM_001113369|ref|NM_007543|ref|NM_001039185	Ceacam2	2.86533
A_55_P2250192	tc|TC1670673	TC1670673	2.86533
A_66_P118479	gb|BX518983|tc|TC1666434|nap|NAP063496-1	Gm567	2.86533
A_55_P2121772	ref|NM_001164679|ens|ENSMUST00000093450|gb|BC059855|gb|BC042391	Ano8	2.86533
A_55_P2082539	ref|NM_134198|ens|ENSMUST00000079633|gb|BC127026|tc|NP496264	Vmn1r234	2.86533
A_52_P219230	ref|NM_178611|ref|NM_001113474|ens|ENSMUST00000086400|ens|ENSMUST00000068865	Lair1	2.86533
A_55_P2082025	Unknown	A_55_P2082025	2.86533
A_30_P01031984	Unknown	chr1:35034564-35047457_R	2.85714
A_30_P01021152	Unknown	chr6:128418399-128429399_F	2.85714
A_30_P01027360	Unknown	chr15:79286294-79286651_R	2.85714
A_55_P2011106	ref|NM_008416|ens|ENSMUST00000064922|gb|AK156596|gb|AK149794	Junb	2.85714
A_55_P2004761	ref|NM_001033978|ens|ENSMUST00000050325|gb|AK137912|tc|TC1587688	H2-Eb2	2.85714
A_30_P01018597	Unknown	chrX:121493684-121500532_F	2.85714
A_55_P2028591	ref|NM_008984|ens|ENSMUST00000076553|ens|ENSMUST00000035874|ens|ENSMUST00000037974	Ptprm	2.85714
A_55_P2016064	Unknown	A_55_P2016064	2.849
A_55_P2135860	ref|NM_001081374|ens|ENSMUST00000094026|ens|ENSMUST00000152697|ens|ENSMUST00000153110	Prss36	2.849
A_55_P1984721	ref|NM_001177609|ref|NM_011665|ref|NM_001177610|gb|AK005058	Ube2i	2.849
A_55_P2145804	ref|NM_026531|ref|NM_001162939|ens|ENSMUST00000107425|ens|ENSMUST00000107423	Aen	2.849
A_55_P2173039	ens|ENSMUST00000167843|gb|AK166771|riken|I1C0010N03	ENSMUST00000167843	2.849
A_55_P2092501	ref|NM_134027|ens|ENSMUST00000092735|ens|ENSMUST00000107545|gb|AK135480	Med1	2.84091
A_51_P357647	ref|NM_028333|ens|ENSMUST00000027885|gb|AK027978|gb|AK142319	Angptl1	2.84091
A_55_P2030761	Unknown	A_55_P2030761	2.84091
A_30_P01019680	Unknown	chr1:59775022-59780348_R	2.84091
A_52_P78023	ref|NM_172397|ens|ENSMUST00000045923|gb|AK169829|gb|AK210253	Limd2	2.84091
A_30_P01030929	Unknown	chr19:5841103-5845579_F	2.83286
A_51_P345902	ref|NM_133964|ens|ENSMUST00000072751|gb|AK154104|gb|AK004052	Dohh	2.83286
A_51_P115953	ref|NM_001134697|ens|ENSMUST00000091892|gb|AK042789|tc|TC1584394	Ctxn3	2.83286
A_55_P2244871	Unknown	A_55_P2244871	2.83286
A_55_P2013223	ref|NM_001081159|ens|ENSMUST00000022186|gb|BC147382|gb|BC147383	S100z	2.83286
A_51_P280492	ref|NM_025358|ens|ENSMUST00000088194|gb|AK012366|gb|AK003137	Ndufa9	2.83286
A_66_P115580	gb|AK076360|gb|AK166401|tc|TC1671688|tc|TC1684208	1700038P13Rik	2.83286
A_52_P639751	ref|NM_001033785|ens|ENSMUST00000046557|gb|BC147265|gb|BC147494	Akap14	2.83286
A_55_P2174490	ref|NM_007645|ens|ENSMUST00000128823|ens|ENSMUST00000154014|ens|ENSMUST00000098461	Cd37	2.83286
A_30_P01032107	Unknown	chr12:5303823-5379098_F	2.82486
A_30_P01021824	Unknown	chr19:29969050-29980675_F	2.82486
A_55_P2044364	ref|NM_199467|ens|ENSMUST00000154349|ens|ENSMUST00000108222|gb|AK144799	Mms22l	2.82486
A_30_P01025819	Unknown	chr3:96205368-96217943_F	2.82486
A_55_P2000133	ref|NM_007664|ens|ENSMUST00000025166|gb|AB008811|gb|M31131	Cdh2	2.82486
A_55_P2038162	ref|NM_015807|ens|ENSMUST00000021082|gb|AK007418|gb|AF078840	Nt5c	2.82486
A_55_P2007334	ref|NM_144913|ens|ENSMUST00000031740|gb|AK154415|gb|AK139731	Mepce	2.82486
A_55_P2075127	ref|NM_011037|ens|ENSMUST00000004340|ens|ENSMUST00000169440|ens|ENSMUST00000111979	Pax2	2.82486
A_55_P1953650	ref|NM_001017968|gb|BG173659|tc|TC1630990|nap|NAP099235-001	Zdhhc18	2.82486
A_30_P01023280	Unknown	chr9:51905865-51911474_R	2.82486
A_30_P01033640	Unknown	chr5:13067925-13096000_R	2.82486
A_66_P129048	ref|NM_001190445|ref|NR_033802|ens|ENSMUST00000148406|gb|AK011291	2610002J02Rik	2.8169
A_30_P01026459	Unknown	chr12:83271350-83357214_F	2.8169
A_51_P349961	ref|NM_008096|ens|ENSMUST00000049209|gb|BC010762|gb|AK010965	Gc	2.8169
A_55_P2159869	ref|NM_011762|ens|ENSMUST00000171387|gb|L16904|tc|TC1596279	Zfp59	2.8169
A_55_P2061421	Unknown	A_55_P2061421	2.8169
A_55_P2046253	ref|NM_025753|ens|ENSMUST00000055421|ens|ENSMUST00000166842|gb|BC049728	4933425O20Rik	2.8169
A_55_P2100197	ens|ENSMUST00000090166|ref|XM_003086329|gb|AK142824|gb|BB525011	ENSMUST00000090166	2.8169
A_55_P2018377	tc|TC1771210	TC1771210	2.8169
A_52_P511381	ref|NM_011571|ens|ENSMUST00000060864|gb|AB003494|gb|AK144302	Tesk1	2.8169
A_55_P2158469	Unknown	A_55_P2158469	2.80899
A_30_P01022808	Unknown	chrX:102222494-102267068_F	2.80899
A_30_P01033087	Unknown	chr4:101010948-101032148_R	2.80899
A_51_P283016	ref|NM_009200|ens|ENSMUST00000005490|gb|AK159197|gb|D83262	Slc1a6	2.80112
A_55_P2083939	ref|NM_016849|ref|NR_045611|ens|ENSMUST00000107835|ens|ENSMUST00000107834	Irf3	2.80112
A_51_P296528	ref|NM_026058|ens|ENSMUST00000008350|gb|AK013554|gb|AK051336	Lass4	2.80112
A_55_P2006930	gb|BC025151|gb|U80890|gb|AK035187|gb|AK164389	2610005L07Rik	2.80112
A_55_P1988413	ref|NM_011993|ens|ENSMUST00000121184|ens|ENSMUST00000122844|ens|ENSMUST00000154273	Dpysl4	2.80112
A_55_P2010539	Unknown	A_55_P2010539	2.7933
A_30_P01030626	Unknown	chr10:18036490-18059965_R	2.7933
A_51_P276802	ref|NM_054080|ens|ENSMUST00000078239|gb|AK012162|tc|TC1591493	Akr1c20	2.7933
A_55_P2017501	ens|ENSMUST00000110843|gb|AK038938|tc|TC1606440|riken|A230077G12	Disp2	2.7933
A_55_P2098076	ens|ENSMUST00000100620|gb|BC034276|ens|ENSMUST00000100627|tc|TC1579678	Trim25	2.78552
A_51_P470414	ref|NM_138600|ref|NM_001127338|ens|ENSMUST00000116635|gb|AK004991	Aldh7a1	2.78552
A_51_P429682	ref|NM_007898|ens|ENSMUST00000140011|ens|ENSMUST00000033509|gb|AK008113	Ebp	2.78552
A_55_P2314396	ens|ENSMUST00000159738|gb|AK014921|tc|NP742686|riken|4921518J05	ENSMUST00000159738	2.78552
A_55_P1976744	nap|NAP068797-1	NAP068797-1	2.78552
A_55_P2003903	ref|NM_009751|ens|ENSMUST00000028907|ens|ENSMUST00000099296|gb|AK143180	Bfsp1	2.78552
A_55_P1978258	Unknown	A_55_P1978258	2.78552
A_55_P2063316	ref|NM_001166251|ref|NM_011844|ref|NM_001166249|ens|ENSMUST00000089449	Mgll	2.78552
A_51_P128499	ref|NM_001081066|ens|ENSMUST00000173292|ens|ENSMUST00000043414|gb|AK053114	Dennd3	2.77778
A_30_P01025773	Unknown	chr12:4133875-4243375_R	2.77778
A_55_P2055920	ref|NR_040759|ens|ENSMUST00000143893|ens|ENSMUST00000130683|gb|AK018929	1700095B22Rik	2.77778
A_30_P01019657	Unknown	chr16:4525147-4542122_R	2.77778
A_51_P498591	ref|NM_029587|ens|ENSMUST00000135066|gb|AK005884|gb|BC087908	1700012A03Rik	2.77778
A_55_P2035986	ref|NR_033736|ens|ENSMUST00000097535|gb|AK143622|gb|CK030712	E330020D12Rik	2.77778
A_30_P01026833	Unknown	chr3:100363012-100369462_F	2.77778
A_55_P2393734	gb|AK016863|riken|4933421H12	4933421H12Rik	2.77778
A_55_P2173664	ens|ENSMUST00000170917|gb|AK136780|gb|BG404624|riken|9330010N06	Gm626	2.77008
A_55_P2150962	ref|NM_170684|ens|ENSMUST00000131659|ens|ENSMUST00000037900|ens|ENSMUST00000134235	Cpne7	2.77008
A_30_P01023546	Unknown	chr19:21655691-21665116_R	2.77008
A_55_P1958951	ens|ENSMUST00000091023|ref|XM_003084554|gb|AK016374|tc|TC1596236	4930589L23Rik	2.77008
A_55_P2080396	ref|NM_023167|ens|ENSMUST00000003386|gb|BC051685|tc|TC1737580	Mrpl4	2.77008
A_52_P686760	ref|NM_010272|gb|BC152721|gb|AF092734|tc|TC1599143	Gdf11	2.77008
A_52_P678816	ref|NM_022326|ens|ENSMUST00000099451|gb|AK005428|gb|AF202528	Ctsm	2.77008
A_55_P1984009	ref|NM_001083945|ref|NM_025789|ens|ENSMUST00000115754|ens|ENSMUST00000097423	Rsph3b	2.77008
A_55_P2348126	gb|AK018780|tc|TC1617866|tc|TC1710089|riken|1500032F14	1500032F14Rik	2.77008
A_52_P574759	ref|NM_009036|ens|ENSMUST00000137427|ens|ENSMUST00000017151|gb|AK131814	Rbpjl	2.76243
A_55_P2077517	ens|ENSMUST00000159021|gb|CA890929|tc|TC1695292|nap|NAP039643-1	Arhgef4	2.76243
A_55_P2068922	ref|NM_153402|ens|ENSMUST00000069097|gb|BC145061|gb|BC137964	Eif2c3	2.76243
A_55_P2250164	ref|NM_033583|ens|ENSMUST00000055935|gb|AF464164|gb|AF464163	Pcdhgc5	2.76243
A_55_P2139763	ref|NM_201373|ens|ENSMUST00000165237|gb|BC045615|gb|AK037350	Trim56	2.76243
A_55_P2063166	ref|NM_177767|ref|NM_001093757|ens|ENSMUST00000109556|gb|AK156765	Ogfod1	2.76243
A_30_P01027335	Unknown	chr3:79075801-79076428_F	2.75482
A_51_P283708	ref|NM_008628|ens|ENSMUST00000024967|gb|U21011|gb|AK157842	Msh2	2.75482
A_55_P1997300	ref|NM_027930|ens|ENSMUST00000169712|gb|AK011410|gb|BB700376	Fam54a	2.75482
A_55_P2297867	gb|BG080185|tc|TC1647552|nap|NAP040184-1	C85181	2.75482
A_30_P01025042	Unknown	chr16:93121505-93142255_F	2.75482
A_55_P2100222	gb|AK031311|tc|TC1594633|riken|6030405G12|nap|NAP075553-1	Gm5433	2.75482
A_30_P01026584	Unknown	chr16:57811599-58042454_F	2.74725
A_30_P01024645	Unknown	chr6:127111250-127142925_F	2.74725
A_30_P01028786	Unknown	chr2:71575871-71583454_R	2.74725
A_30_P01027849	Unknown	chr8:41941084-41947630_R	2.73973
A_55_P2020636	Unknown	A_55_P2020636	2.73973
A_51_P275751	ref|NM_033477|ens|ENSMUST00000061859|ens|ENSMUST00000173873|gb|BC138707	D17H6S53E	2.73973
A_55_P2092760	ref|NM_177370|ens|ENSMUST00000101610|ens|ENSMUST00000036320|ens|ENSMUST00000109878	Rhbdd3	2.73973
A_55_P2059337	ref|NM_023229|ens|ENSMUST00000149085|ens|ENSMUST00000151900|ens|ENSMUST00000030800	Fastk	2.73973
A_55_P2035559	ref|NM_153563|ens|ENSMUST00000106707|ens|ENSMUST00000064759|gb|AK032065	Fam40a	2.73973
A_30_P01025809	Unknown	chr12:88235624-88264465_F	2.73973
A_51_P514085	ref|NM_013606|ref|NR_003508|ens|ENSMUST00000024112|gb|BC007127	Mx2	2.73224
A_55_P2030020	ref|NR_015546|ens|ENSMUST00000064930|gb|AK160721|gb|BC094571	C130026L21Rik	2.73224
A_55_P2097340	ref|NM_145621|ens|ENSMUST00000035700|gb|BC017634|gb|AK085143	Camkv	2.73224
A_55_P2203284	ref|XM_003085417|ref|XM_003085789|gb|AK033665|tc|TC1766134	9130213A22Rik	2.73224
A_30_P01023649	Unknown	chr5:110158475-110223700_F	2.7248
A_30_P01027278	Unknown	chr13:112210279-112212150_R	2.7248
A_55_P2063553	Unknown	A_55_P2063553	2.7248
A_51_P357341	ref|NM_033444|ens|ENSMUST00000007257|gb|AK150382|gb|AK153509	Clic1	2.7248
A_55_P2180854	ref|NM_203492|ens|ENSMUST00000058092|gb|BC100302|tc|TC1589858	Mrgprg	2.7248
A_55_P2171715	ref|NM_010270|ref|NM_001010930|ens|ENSMUST00000031978|gb|AK019000	Mrps33	2.7248
A_55_P2037513	ref|NM_011116|ens|ENSMUST00000117611|ens|ENSMUST00000117095|gb|AK153508	Pld3	2.7248
A_55_P2163795	tc|TC1581015|nap|NAP026161-1|nap|NAP004821-001	TC1581015	2.7248
A_30_P01024920	Unknown	chrX:50400250-50410825_R	2.7248
A_30_P01023917	Unknown	chr16:90038086-90127636_R	2.7248
A_55_P2362196	ref|NM_177911|ens|ENSMUST00000026893|gb|AF486627|gb|AK035279	Tgm4	2.7248
A_55_P2185504	ref|NM_010767|ens|ENSMUST00000103219|ens|ENSMUST00000136647|gb|AJ250369	Masp2	2.7248
A_55_P1958172	ref|NM_183190|ens|ENSMUST00000067673|ens|ENSMUST00000113013|gb|AY039036	Ms4a5	2.7248
A_55_P2331546	ens|ENSMUST00000151170|gb|AK081964|riken|C130090D04|nap|NAP089841-1	ENSMUST00000151170	2.7248
A_55_P1980854	ref|NM_027480|ens|ENSMUST00000154707|ens|ENSMUST00000119336|gb|AK173316	Ankrd24	2.7248
A_55_P1953231	ref|NM_011840|ens|ENSMUST00000034920|ens|ENSMUST00000113945|gb|AB019374	Map2k5	2.71739
A_55_P1971498	ref|NM_027270|ens|ENSMUST00000087133|gb|AK013041|gb|BC064811	Exoc1	2.71739
A_30_P01021199	Unknown	chr4:56013597-56020622_R	2.71739
A_55_P2286243	gb|AK038689|tc|TC1597496|riken|A230055D09	2410137F16Rik	2.71739
A_55_P2062573	ref|NM_001204134|ref|NM_030888|ens|ENSMUST00000022853|gb|AK128898	C1qtnf3	2.71739
A_55_P2186302	gb|AK044503|tc|TC1588747|riken|A930017G19|nap|NAP076300-1	Gm9866	2.71003
A_55_P2037066	ref|NM_001177767|ref|NM_009051|ref|NM_001103158|ens|ENSMUST00000105725	Gm13138	2.71003
A_55_P2116664	ref|NM_133255|ref|NM_001167991|ens|ENSMUST00000098561|ens|ENSMUST00000064495	Hook2	2.71003
A_55_P2114736	nap|NAP068989-1	NAP068989-1	2.7027
A_51_P113588	ref|NM_146050|ens|ENSMUST00000022269|gb|AK009397|gb|AK010206	Oit1	2.7027
A_30_P01023587	Unknown	chrX:33750475-33770425_F	2.7027
A_55_P2097434	ref|XM_003084907|ref|XM_003085824	Strm	2.7027
A_30_P01022508	Unknown	chr5:54053882-54054174_F	2.7027
A_30_P01024353	Unknown	chr3:117935228-118089771_R	2.7027
A_51_P376711	ens|ENSMUST00000126693|gb|BC028660|tc|TC1591914	ENSMUST00000126693	2.7027
A_55_P2076777	ref|NM_001109973|ref|NM_010783|ens|ENSMUST00000035375|ens|ENSMUST00000066368	Mdfi	2.7027
A_30_P01031148	Unknown	chr12:21548850-21568550_R	2.69542
A_55_P1966470	Unknown	A_55_P1966470	2.69542
A_51_P424878	ref|NM_025582|ens|ENSMUST00000030935|gb|AK005188|gb|AK012999	2810405K02Rik	2.69542
A_55_P1975937	tc|TC1763058	TC1763058	2.69542
A_30_P01031383	Unknown	chr9:96670035-96682896_F	2.69542
A_30_P01022642	Unknown	chr1:73664661-73911040_R	2.68817
A_55_P1955841	ref|NM_008906|ref|NM_001038492|ens|ENSMUST00000103093|ens|ENSMUST00000017904	Ctsa	2.68817
A_52_P475854	ref|NM_001008421|gb|AK166160|gb|AK160864|gb|BC086676	Nol10	2.68817
A_30_P01028039	Unknown	chr8:122712014-122732520_F	2.68817
A_51_P148122	ref|NM_027910|ref|NM_001163729|ens|ENSMUST00000071841|ens|ENSMUST00000165007	Klhdc3	2.68817
A_55_P2109412	ens|ENSMUST00000103603|ens|ENSMUST00000103666|ens|ENSMUST00000103630|gb|X63927	ENSMUST00000103603	2.68817
A_55_P2274961	gb|AK011565|tc|TC1596524|riken|2610027F03|nap|NAP017243-001	2610027F03Rik	2.68097
A_51_P518600	ref|NM_133699|ref|NM_001159632|ens|ENSMUST00000167894|ens|ENSMUST00000140751	Atp6v1c2	2.68097
A_55_P2112991	ref|NM_009208|ens|ENSMUST00000006751|gb|BC080271|tc|TC1605126	Slc4a3	2.68097
A_30_P01019919	Unknown	chrX:20376867-20377837_F	2.68097
A_55_P2063761	gb|AK050857|riken|D030026J23|nap|NAP085101-1	AK050857	2.68097
A_30_P01026304	Unknown	chr1:69566918-69567447_R	2.68097
A_55_P1964138	ref|NM_013784|ens|ENSMUST00000070699|gb|AK132928|gb|EU234001	Pign	2.68097
A_55_P2368680	gb|AK132758|riken|4922505F16	Gm10741	2.68097
A_55_P2141088	ens|ENSMUST00000107162|ens|ENSMUST00000107165|ens|ENSMUST00000107166|nap|NAP039851-1	Odz4	2.68097
A_51_P212782	ref|NM_008361|ens|ENSMUST00000028881|gb|BC013644|gb|BC011437	Il1b	2.6738
A_30_P01021922	Unknown	chr3:62727150-62758225_R	2.6738
A_55_P2175318	ens|ENSMUST00000101405|gb|AK155135|gb|U42384|ens|ENSMUST00000163244	Dfna5	2.6738
A_55_P2097329	ens|ENSMUST00000156064|ens|ENSMUST00000137004|gb|AK166391|gb|AK164757	Sgsm3	2.6738
A_55_P2032445	ref|NM_026331|ens|ENSMUST00000037064|gb|AK019700|gb|AK021203	Slc25a37	2.6738
A_55_P2000137	ref|NM_011214|ref|NM_001083119|ens|ENSMUST00000105986|ens|ENSMUST00000127633	Ptpru	2.6738
A_55_P1965124	tc|TC1648943|nap|NAP040041-1	TC1648943	2.6738
A_55_P1972277	ref|NM_001110516|gb|AK149268|riken|A930008A01	Samd11	2.6738
A_55_P2050360	Unknown	A_55_P2050360	2.6738
A_55_P2212006	gb|AK010742|tc|TC1715511|riken|2410087M07|nap|NAP019924-001	2410087M07Rik	2.6738
A_55_P1952920	ref|NR_027236|ens|ENSMUST00000154570|gb|AK129002|gb|AK038960	AI854703	2.66667
A_51_P362959	ref|NM_025386|ens|ENSMUST00000151737|ens|ENSMUST00000143656|ens|ENSMUST00000097672	Fbxo36	2.66667
A_55_P2056014	nap|NAP123678-1	NAP123678-1	2.66667
A_66_P112399	ref|NR_015528|gb|AK009222|gb|BC029722|gb|AK159419	BC029722	2.66667
A_55_P2149500	ref|NM_010630|ens|ENSMUST00000004294|gb|D49545|tc|TC1580057	Kifc2	2.65957
A_55_P2200466	ref|XM_003084739|ref|XM_003086648|gb|BC002195|tc|TC1593839	1500002F19Rik	2.65957
A_55_P2038347	ref|NM_134246|ens|ENSMUST00000021653|ens|ENSMUST00000120927|gb|AY563097	Acot3	2.65957
A_55_P2182911	Unknown	A_55_P2182911	2.65957
A_55_P2008740	ref|NM_010186|ens|ENSMUST00000090775|ens|ENSMUST00000029748|gb|AK033874	Fcgr1	2.65957
A_55_P2252601	ref|XR_104791|ref|XR_107521|gb|AK015605|tc|TC1600549	4930481B07Rik	2.65957
A_55_P2159573	ref|NM_001204931|ref|NM_139292|ens|ENSMUST00000105354|gb|AK002562	Reep6	2.65957
A_55_P2162452	ref|NM_011900|ens|ENSMUST00000018905|gb|BC026776|gb|AB024713	Mpdu1	2.65957
A_30_P01025862	Unknown	chr3:137736327-137752677_F	2.65252
A_51_P399845	ref|NM_008006|ens|ENSMUST00000038885|ens|ENSMUST00000138563|gb|AY027551	Fgf2	2.65252
A_30_P01028845	Unknown	chr3:10081893-10094218_R	2.65252
A_30_P01029757	Unknown	chr1:183783306-183834531_F	2.65252
A_30_P01025493	Unknown	chr5:123582742-123588202_F	2.65252
A_55_P2108109	ref|NM_010205|ref|NM_001166361|ref|NM_001166362|ref|NM_001166363	Fgf8	2.65252
A_30_P01033017	Unknown	chr8:47813487-47824869_R	2.65252
A_55_P2094713	ref|NM_053251|ref|XR_035022|ref|XR_107855|gb|BC160210	Gm4736	2.65252
A_55_P2205468	ens|ENSMUST00000031535|gb|M57966|tc|TC1582906|nap|NAP122171-001	Hnf1a	2.6455
A_55_P2005269	ref|NM_007740|ens|ENSMUST00000084261|ens|ENSMUST00000054588|gb|L12215	Col9a1	2.6455
A_55_P2132697	Unknown	A_55_P2132697	2.63852
A_30_P01018625	Unknown	chr12:45415565-45423519_R	2.63852
A_55_P2185143	ens|ENSMUST00000111181|ens|ENSMUST00000111182|gb|AK090036|gb|AF367709	Fkbp6	2.63852
A_52_P938109	ref|NM_025788|ens|ENSMUST00000001975|gb|AK012935|gb|BC052706	Nacc1	2.63852
A_52_P425971	ref|NM_183097|ens|ENSMUST00000140120|ens|ENSMUST00000172548|ens|ENSMUST00000174570	1700067K01Rik	2.63852
A_55_P2113723	gb|AK135714|ens|ENSMUST00000097698|riken|7420405J16	Pecr	2.63852
A_55_P2136533	ref|NM_001033276|ens|ENSMUST00000023741|gb|BC058659|tc|TC1604638	Mll2	2.63852
A_52_P550049	ref|NM_001110832|ref|NM_010913|ens|ENSMUST00000162460|ens|ENSMUST00000078800	Nfya	2.63852
A_55_P2065537	tc|TC1676666|tc|TC1722797	TC1676666	2.63852
A_30_P01022068	Unknown	chr10:126818382-126856582_R	2.63158
A_30_P01025729	Unknown	chr12:76744947-76778372_R	2.63158
A_55_P2002792	ref|NM_007887|ens|ENSMUST00000067695|gb|U41636|tc|TC1596559	Dub1	2.63158
A_51_P424781	ref|NM_025323|ens|ENSMUST00000046207|gb|AK003683|gb|AK002375	0610009D07Rik	2.63158
A_51_P234233	ref|NM_001009545|ens|ENSMUST00000063317|gb|AK029742|gb|BC111877	Adam6b	2.63158
A_55_P2170978	ref|NM_026720|ens|ENSMUST00000075870|ens|ENSMUST00000163858|ens|ENSMUST00000056888	Ankrd13d	2.63158
A_51_P384318	ref|NM_023143|ens|ENSMUST00000068593|gb|AF148216|gb|BC004637	C1ra	2.62467
A_55_P1956799	ref|NM_025357|ref|NM_001252591|ref|NR_045569|ens|ENSMUST00000126418	Smpx	2.62467
A_30_P01026451	Unknown	chr3:92065425-92086850_F	2.62467
A_55_P2017577	Unknown	A_55_P2017577	2.62467
A_52_P391210	ref|NM_009353|ref|NM_001083118|ens|ENSMUST00000095178|ens|ENSMUST00000141205	Terf2	2.62467
A_55_P1965861	ref|NM_001243021|gb|AK034698|gb|AK162098|tc|TC1605521	Zfp939	2.6178
A_52_P316405	ref|NM_001081108|ens|ENSMUST00000160157|gb|AK003086|gb|AK003250	0910001L09Rik	2.6178
A_66_P137157	ref|NM_144509|ens|ENSMUST00000031351|gb|AB035383|gb|BC063748	Arl6ip4	2.6178
A_52_P601914	ref|NM_146075|ens|ENSMUST00000055117|gb|AK143224|gb|AK213669	Lemd2	2.6178
A_51_P512960	ens|ENSMUST00000064445|gb|AK083698|tc|TC1593629|riken|D030068E18	Spsb4	2.6178
A_55_P2042713	ref|NM_011822|ens|ENSMUST00000148045|ens|ENSMUST00000026823|gb|AK155173	Pigq	2.6178
A_55_P1980321	ref|NM_021568|ens|ENSMUST00000166520|ens|ENSMUST00000168465|ens|ENSMUST00000168505	Pcbp3	2.6178
A_55_P2083382	ref|NM_033568|ens|ENSMUST00000145749|ens|ENSMUST00000006217|ens|ENSMUST00000107700	Snf8	2.6178
A_30_P01031719	Unknown	chr12:89092175-89105525_F	2.61097
A_30_P01019028	Unknown	chr4:135138014-135174889_R	2.61097
A_30_P01022889	Unknown	chr2:28151215-28151611_F	2.61097
A_55_P1992849	ref|NM_013462|ens|ENSMUST00000081438|gb|AK136495|tc|TC1584849	Adrb3	2.61097
A_51_P376445	ref|NM_008818|gb|AK146449|gb|BC056204|gb|AK146379	Rhox5	2.61097
A_30_P01024714	Unknown	chr1:90508551-90508788_R	2.61097
A_30_P01022623	Unknown	chr11:120094176-120097622_R	2.60417
A_55_P2062058	ref|NM_026797|ref|NM_001048229|ref|NM_001048228|ref|NM_001048227	Dbndd2	2.60417
A_30_P01025193	Unknown	chr13:61837025-61851225_R	2.60417
A_55_P2045859	Unknown	A_55_P2045859	2.60417
A_55_P2051854	nap|NAP113893-1	NAP113893-1	2.60417
A_30_P01025125	Unknown	chr6:95418306-95424131_F	2.5974
A_51_P507778	ref|NM_028725|ens|ENSMUST00000173522|ens|ENSMUST00000037955|gb|AK014586	Sdr42e1	2.5974
A_55_P2114953	ref|NM_011909|ens|ENSMUST00000032198|gb|AF069502|gb|AK149772	Usp18	2.59067
A_55_P2361841	gb|AK016606|tc|NP741617|riken|4933401L05|nap|NAP073452-1	4933401L05Rik	2.59067
A_55_P2058137	ref|NM_001039376|ref|NM_001110163|gb|BC046620|gb|AJ290946	Pde4dip	2.59067
A_55_P1996872	ref|NM_023127|ref|NM_001039368|ens|ENSMUST00000057177|ref|XM_001476827	Polr2k	2.59067
A_51_P282594	ref|NM_026805|ens|ENSMUST00000058472|gb|AK053833|gb|BC059878	Svop	2.59067
A_51_P146223	ref|NM_001033131|ens|ENSMUST00000098559|gb|BC145438|gb|AK131606	Krtdap	2.59067
A_55_P1984347	ref|NM_001114157|ens|ENSMUST00000096457	Rhox3h	2.59067
A_55_P1971298	ref|NM_028782|ens|ENSMUST00000097301|ens|ENSMUST00000047226|gb|AK131910	Lonp1	2.59067
A_66_P139618	ref|NM_001082545|gb|M92418|nap|NAP098315-001	Stfa2	2.59067
A_30_P01032320	Unknown	chr18:38395600-38407525_R	2.58398
A_30_P01019534	Unknown	chr13:9818700-9824125_R	2.58398
A_55_P2036813	ref|NM_030082|ens|ENSMUST00000078267|gb|AK018765|gb|BC051921	Hist3h2ba	2.58398
A_55_P2079175	ref|NM_010065|ens|ENSMUST00000156866|ens|ENSMUST00000035664|ens|ENSMUST00000129156	Dnm1	2.58398
A_30_P01026681	Unknown	chr6:11996975-12037300_R	2.58398
A_52_P250034	gb|AK045208|gb|AK017879|tc|TC1590794|riken|B130047F11	5730590G19Rik	2.58398
A_30_P01023611	Unknown	chr9:121845920-121858120_R	2.57732
A_55_P2105858	ref|NM_030693|ref|NR_033136|ens|ENSMUST00000107893|ens|ENSMUST00000047356	Atf5	2.57732
A_55_P2075237	ref|NM_027895|ref|NM_025563|ref|NM_178589|ref|NM_026696	Ulk3	2.57732
A_55_P2037897	ref|NM_023336|ref|NM_001113574|ref|NM_001113573|ens|ENSMUST00000028282	Brd3	2.57732
A_51_P228892	ref|NM_016927|ens|ENSMUST00000014647|gb|AF182033|tc|TC1586251	Pkd2l2	2.57732
A_30_P01029796	Unknown	chr8:59994074-60002058_F	2.57732
A_55_P1986421	ref|NM_013687|ref|NM_001085555|ens|ENSMUST00000042692|ens|ENSMUST00000043925	Tcp11	2.57069
A_55_P2147200	ref|NM_001081352|ens|ENSMUST00000091466|tc|TC1643583|nap|NAP111590-1	Ttc37	2.57069
A_52_P644690	ref|NM_013520|ens|ENSMUST00000134065|ens|ENSMUST00000146760|ens|ENSMUST00000003516	Flt3l	2.5641
A_55_P2129771	ens|ENSMUST00000015620|tc|TC1650414|tc|TC1747977	Prrt1	2.5641
A_30_P01031172	Unknown	chr14:21621875-21638625_R	2.55754
A_55_P2175832	gb|AK089738|riken|F830012G24|nap|NAP124280-1	Gm10428	2.55754
A_55_P2172693	Unknown	A_55_P2172693	2.55754
A_30_P01018961	Unknown	chr2:175640275-175701875_F	2.55754
A_51_P282557	ref|NM_009779|ens|ENSMUST00000042081|gb|U77460|gb|AK080984	C3ar1	2.55754
A_30_P01026649	Unknown	chr2:104398943-104412968_F	2.55754
A_55_P1956267	ref|NM_018804|ens|ENSMUST00000107505|ens|ENSMUST00000090945|ens|ENSMUST00000107503	Syt11	2.55754
A_55_P2082489	ref|NM_147036|ens|ENSMUST00000057386|gb|BC125358|nap|NAP021758-001	Olfr283	2.55754
A_51_P505823	ref|NM_028013|ens|ENSMUST00000041780|ens|ENSMUST00000167549|gb|AK173036	Endod1	2.55102
A_30_P01019596	Unknown	chr4:8606650-8614031_R	2.55102
A_30_P01029078	Unknown	chr6:37732925-37784092_R	2.55102
A_55_P2077488	ens|ENSMUST00000060348|ref|XM_001477403|ref|XM_001478760|gb|AK017242	5330417H12Rik	2.55102
A_30_P01025759	Unknown	chr2:80338640-80339980_R	2.55102
A_55_P2168254	gb|CF981931	CF981931	2.55102
A_55_P2091916	ens|ENSMUST00000167326|ens|ENSMUST00000165136|ens|ENSMUST00000163655|nap|NAP058266-1	ENSMUST00000167326	2.55102
A_55_P2038484	ref|NM_175017|ens|ENSMUST00000168837|gb|CJ202435	4933427D06Rik	2.54453
A_55_P2006250	ref|NM_010864|gb|AK035816|ens|ENSMUST00000123128|tc|TC1601670	Myo5a	2.54453
A_51_P298538	ref|NM_145404|ens|ENSMUST00000071592|gb|AK154255|gb|AK173304	Prmt7	2.54453
A_55_P2017987	ens|ENSMUST00000067093|gb|AK036090|gb|EF644173|ens|ENSMUST00000159608	Pde8b	2.54453
A_51_P327828	ref|NM_011149|ens|ENSMUST00000034947|gb|AK002357|gb|X58990	Ppib	2.54453
A_30_P01027519	Unknown	chr17:29571806-29603008_F	2.54453
A_55_P2131951	gb|BF149588	BF149588	2.53807
A_30_P01033258	Unknown	chr14:80080060-80080597_R	2.53807
A_52_P253299	ref|NM_001003910|ens|ENSMUST00000166220|ens|ENSMUST00000075632|gb|AK166553	BC030307	2.53807
A_51_P391727	ref|NM_009205|ens|ENSMUST00000024944|gb|AK052623|gb|AK132275	Slc3a1	2.53807
A_52_P374983	gb|AK080381|tc|TC1595732|riken|A630085K21|nap|NAP089660-1	9330175E14Rik	2.53807
A_30_P01030664	Unknown	chr5:23757625-23791625_R	2.53807
A_30_P01032916	Unknown	chr12:4581550-4599600_F	2.53807
A_55_P2135556	ref|NM_023879|ref|NM_001168515|ens|ENSMUST00000111600|ens|ENSMUST00000111603	Rpgrip1	2.53807
A_30_P01019113	Unknown	chr4:105035450-105059250_F	2.53807
A_30_P01032170	Unknown	chr3:19179899-19216399_F	2.53165
A_55_P2004037	ref|XM_003086159|ref|XM_993996|gb|AK014162|gb|AV311382	3110040M04Rik	2.52525
A_55_P2304482	gb|AK053996|tc|TC1611548|riken|E230011F24|nap|NAP088140-1	2700086A05Rik	2.52525
A_52_P209172	ref|NM_001031808|ens|ENSMUST00000045604|gb|AK003340|gb|BC034728	Mrpl41	2.52525
A_30_P01020863	Unknown	chr11:22510175-22522025_F	2.52525
A_52_P614207	ens|ENSMUST00000103399|gb|BC080787|gb|X63815|gb|U61495	ENSMUST00000103399	2.51889
A_55_P2149921	tc|TC1780716	TC1780716	2.51889
A_55_P1998549	ref|NM_011986|ens|ENSMUST00000106116|ens|ENSMUST00000127079|ens|ENSMUST00000030637	Ncdn	2.51889
A_52_P93910	ref|NM_001077403|ref|NM_001077404|ref|NM_010939|ref|NM_001077405	Nrp2	2.51889
A_52_P387954	ref|NM_021608|ens|ENSMUST00000123602|ens|ENSMUST00000033156|gb|AK145958	Dctn5	2.51256
[truncated: 11 more rows]
